# Supplementary material for: CLPP-Null Eukaryotes with Excess Heme Biosynthesis Show L-arginine Reduction, Probably via CLPX-Mediated OAT Activation
Source: Preprints.org preprint supplement (doi:10.20944/preprints202401.1423.v1), 2024-01-19
Supplement: Supplementary file 1 [file supplementary]

## Sheet: PODANS-CLPPnull-proteome-8d
Fasta headers	Protein IDs	Majority protein IDs	Mammals Gene	protein domains	Student's T-test Significant KO_0h_WT_0h q value	Student's T-test Significant KO_0h_WT_0h _p value	Student's T-test q-value KO_0h_WT_0h	Student's T-test p-value KO_0h_WT_0h	Fold change KO/WT	-Log p-value	Student's T-test Difference KO_8d_WT_8d	Student's T-test Test statistic KO_8d_WT_8d	Student's T-test Difference KO_8d_WT_8d_	Student's T-test Test statistic KO_8d_WT_8d_	Peptide counts (all)	Peptide counts (razor+unique)	Peptide counts (unique)	log2 LFQ intensity S02	log2 LFQ intensity S04	log2 LFQ intensity S06	log2 LFQ intensity S08	log2 LFQ intensity S10	log2 LFQ intensity S12	Only identified by site	Reverse	Potential contaminant	Student's T-test significant	Student's T-test significant_	Peptides	Razor + unique peptides	Unique peptides	Sequence coverage [%]	Unique + razor sequence coverage [%]	Unique sequence coverage [%]	Mol. weight [kDa]	Q-value	Score	Intensity	MS/MS count	Peptides S02	Peptides S04	Peptides S06	Peptides S08	Peptides S10	Peptides S12	Razor + unique peptides S02	Razor + unique peptides S04	Razor + unique peptides S06	Razor + unique peptides S08
tr|B2ADP0|B2ADP0_PODAN Podospora anserina S mat+ genomic DNA chromosome 4, supercontig 1 OS=Podospora anserina (strain S / ATCC MYA-4624 / DSM 980 / FGSC 10383) OX=515849 GN=PODANS_4_1620 PE=4 SV=1	B2ADP0	B2ADP0	Nrmt=Ntmt1 or Mettl11b=Nrmt2 or Asmt	Homolog of SAM-dependent methyltransferase / spermidine synthase	+	+	0	1.06895e-07	615.953	6.97104	9.26668	86.537	9.26668	86.537	3	3	3	15.6994	15.6994	15.6994	25.097	24.7538	25.0474				KO_0h_WT_0h	KO_0h_WT_0h	3	3	3	6.7	6.7	6.7	47.278	0	5.2535	98853000	3	0	0	0	3	1	1	0	0	0	3
tr|B2ANA7|B2ANA7_PODAN Podospora anserina S mat+ genomic DNA chromosome 6, supercontig 4 OS=Podospora anserina (strain S / ATCC MYA-4624 / DSM 980 / FGSC 10383) OX=515849 GN=PODANS_6_10020 PE=4 SV=1	B2ANA7	B2ANA7	Bdh2	3-hydroxybutyrate dehydrogenase, type 2; Dehydrogenase that mediates the formation of 2,5- dihydroxybenzoic acid (2,5-DHBA), a siderophore that shares structural similarities with bacterial enterobactin and associates with LCN2, thereby playing a key role in iron homeostasis and transport. Also acts as a 3-hydroxybutyrate dehydrogenase			0.413659	0.111443	0.0105619	0.952945	-6.56499	-2.03605	-6.56499	-2.03605	2	2	2	25.6151	25.357	25.4916	15.6994	25.37	15.6994						2	2	2	10.4	10.4	10.4	29.69	0	3.5695	189090000	1	1	1	1	1	1	0	1	1	1	1
tr|B2ARQ6|B2ARQ6_PODAN Podospora anserina S mat+ genomic DNA chromosome 4, supercontig 4 OS=Podospora anserina (strain S / ATCC MYA-4624 / DSM 980 / FGSC 10383) OX=515849 GN=PODANS_4_6710 PE=4 SV=1	B2ARQ6	B2ARQ6	Rpl33	Mitoribosomal L33 domain, Zn-binding	+	+	0	4.81078e-05	563.558	4.31778	9.13842	18.7036	9.13842	18.7036	1	1	1	15.6994	15.6994	15.6994	25.4867	23.8806	25.1461				KO_0h_WT_0h	KO_0h_WT_0h	1	1	1	12.1	12.1	12.1	6.8753	0.00074294	2.5964	99594000	6	0	0	0	1	1	1	0	0	0	1
tr|B2B147|B2B147_PODAN Podospora anserina S mat+ genomic DNA chromosome 3, supercontig 2 OS=Podospora anserina (strain S / ATCC MYA-4624 / DSM 980 / FGSC 10383) OX=515849 GN=PODANS_3_9280 PE=3 SV=1	B2B147	B2B147	Rpl7	Mitoribosomal protein uL30m	+	+	0	1.54066e-06	261.207	5.81229	8.02905	44.3858	8.02905	44.3858	1	1	1	15.6994	15.6994	15.6994	24.0876	23.5109	23.5869				KO_0h_WT_0h	KO_0h_WT_0h	1	1	1	8	8	8	14.15	0.0043259	2.2012	42380000	1	0	0	0	1	1	1	0	0	0	1
tr|B2AXV7|B2AXV7_PODAN Podospora anserina S mat+ genomic DNA chromosome 1, supercontig 2 OS=Podospora anserina (strain S / ATCC MYA-4624 / DSM 980 / FGSC 10383) OX=515849 GN=PODANS_1_8990 PE=3 SV=1	B2AXV7	B2AXV7	ACAT1	acetyl-Coenzyme A acetyltransferase 1; Plays a major role in ketone body metabolism			0.487612	0.156607	0.868145	0.80519	-0.203992	-1.74126	-0.203992	-1.74126	15	15	15	33.3328	33.0357	33.0906	32.9468	33.0773	32.823						15	15	15	61.2	61.2	61.2	41.303	0	323.31	53885000000	185	12	15	13	14	14	14	12	15	13	14
tr|B2B851|B2B851_PODAN Podospora anserina S mat+ genomic DNA chromosome 2, supercontig 2 OS=Podospora anserina (strain S / ATCC MYA-4624 / DSM 980 / FGSC 10383) OX=515849 GN=PODANS_2_13330 PE=4 SV=1	B2B851	B2B851	Acp1	Acid phosphatase 1, soluble			0.413094	0.109999	60.1631	0.95861	5.91081	2.04752	5.91081	2.04752	1	1	1	15.6994	15.6994	24.3558	24.667	24.3768	24.4432						1	1	1	10.4	10.4	10.4	18.168	0	4.3007	92705000	1	0	0	1	1	1	1	0	0	1	1
tr|B2AMZ4|B2AMZ4_PODAN Podospora anserina S mat+ genomic DNA chromosome 6, supercontig 4 OS=Podospora anserina (strain S / ATCC MYA-4624 / DSM 980 / FGSC 10383) OX=515849 GN=PODANS_6_8460 PE=4 SV=1	B2AMZ4	B2AMZ4	IDH	Heterokaryon incompatibility protein (HET) - Ankyrin Repeat Domain	+	+	0	3.54292e-05	235.762	4.45064	7.88119	20.2038	7.88119	20.2038	1	1	1	15.6994	15.6994	15.6994	24.3578	23.1329	23.2511				KO_0h_WT_0h	KO_0h_WT_0h	1	1	1	2.1	2.1	2.1	70.121	0.004351	2.2633	40680000	1	0	0	0	1	1	1	0	0	0	1
tr|B2ABF7|B2ABF7_PODAN Actin-related protein 2/3 complex subunit 4 OS=Podospora anserina (strain S / ATCC MYA-4624 / DSM 980 / FGSC 10383) OX=515849 GN=PODANS_1_20940 PE=3 SV=1	B2ABF7	B2ABF7		Actin-related protein 2/3 complex subunit 4			0.959036	0.860164	0.985615	0.0654186	-0.0209039	-0.187815	-0.0209039	-0.187815	4	4	4	29.8678	29.911	30.2164	29.9902	30.0017	29.9406						4	4	4	26.6	26.6	26.6	19.639	0	41.895	6408500000	49	4	4	4	4	4	4	4	4	4	4
tr|B2ABN3|B2ABN3_PODAN Podospora anserina S mat+ genomic DNA chromosome 1, supercontig 5 OS=Podospora anserina (strain S / ATCC MYA-4624 / DSM 980 / FGSC 10383) OX=515849 GN=PODANS_1_20415 PE=4 SV=1	B2ABN3	B2ABN3	Muc5ac	Mucin-5AC homologous		+	0.355221	0.0325035	7.40213	1.48807	2.88794	3.21276	2.88794	3.21276	5	5	5	25.929	23.632	24.906	26.5211	28.1069	28.5028					KO_0h_WT_0h	5	5	5	20.3	20.3	20.3	32.849	0	14.424	874070000	12	4	2	4	5	2	4	4	2	4	5
tr|B2AWM1|B2AWM1_PODAN Eukaryotic translation initiation factor 6 OS=Podospora anserina (strain S / ATCC MYA-4624 / DSM 980 / FGSC 10383) OX=515849 GN=TIF6 PE=3 SV=1	B2AWM1	B2AWM1	EIF6	eIF6 homologous; binds to 60S ribosomal subunit, prevents association with 40S		+	0.3685	0.04209	7.22511	1.37582	2.85302	2.94711	2.85302	2.94711	2	2	2	23.5715	25.8398	26.4592	28.6336	27.3325	28.4635					KO_0h_WT_0h	2	2	2	10.2	10.2	10.2	26.523	0	18.118	1120400000	8	1	2	1	2	2	1	1	2	1	2
tr|A0A090D6B4|A0A090D6B4_PODAN Acetyl-coenzyme A synthetase OS=Podospora anserina (strain S / ATCC MYA-4624 / DSM 980 / FGSC 10383) OX=515849 PE=3 SV=1	A0A090D6B4	A0A090D6B4		Acetyl-coenzyme A synthetase		+	0.316906	0.0220868	6.17115	1.65587	2.62554	3.63373	2.62554	3.63373	4	4	4	26.4746	24.1177	25.2156	28.1044	27.4128	28.1673					KO_0h_WT_0h	4	4	4	7.9	7.9	7.9	73.602	0	5.8628	919130000	9	4	4	4	3	2	3	4	4	4	3
tr|A0A090CVN2|A0A090CVN2_PODAN Adenylyl cyclase-associated protein OS=Podospora anserina (strain S / ATCC MYA-4624 / DSM 980 / FGSC 10383) OX=515849 PE=3 SV=1	A0A090CVN2	A0A090CVN2	Cap2	Adenylyl cyclase-associated protein			0.925907	0.696048	1.12087	0.157361	0.164624	0.420024	0.164624	0.420024	2	2	2	25.532	25.1507	25.2311	26.2004	24.9642	25.2431						2	2	2	4.8	4.8	4.8	57.981	0	5.3173	274700000	5	2	2	1	2	1	2	2	2	1	2
tr|B2AWJ2|B2AWJ2_PODAN Alkaline phosphatase OS=Podospora anserina (strain S / ATCC MYA-4624 / DSM 980 / FGSC 10383) OX=515849 GN=PODANS_7_7340 PE=3 SV=1	B2AWJ2	B2AWJ2	Alpl	Alkaline phosphatase			0.955155	0.839427	0.975883	0.0760172	-0.0352198	-0.216177	-0.0352198	-0.216177	2	2	2	25.3101	24.8865	25.3736	25.0481	25.239	25.1775						2	2	2	3.9	3.9	3.9	66.882	0	11.591	232680000	15	2	2	2	2	2	2	2	2	2	2
tr|B2B823|B2B823_PODAN Podospora anserina S mat+ genomic DNA chromosome 2, supercontig 2 OS=Podospora anserina (strain S / ATCC MYA-4624 / DSM 980 / FGSC 10383) OX=515849 GN=PODANS_2_13050 PE=4 SV=1	B2B823	B2B823	NOP2	NOP2, Methyltransferase-like protein 7B homologous		+	0.337043	0.0199075	6.07514	1.70098	2.60292	3.75229	2.60292	3.75229	4	4	4	24.6426	25.246	26.7019	27.6441	27.9987	28.7565					KO_0h_WT_0h	4	4	4	21.3	21.3	21.3	32.857	0	50.953	1106600000	15	3	4	3	3	4	4	3	4	3	3
tr|B2B251|B2B251_PODAN Podospora anserina S mat+ genomic DNA chromosome 6, supercontig 2 OS=Podospora anserina (strain S / ATCC MYA-4624 / DSM 980 / FGSC 10383) OX=515849 GN=PODANS_6_5560 PE=4 SV=1	B2B251	B2B251	OGDH	alpha-ketoglutarate dehydrogenase complex E2 component			0.702498	0.348329	1.67589	0.45801	0.744926	1.06143	0.744926	1.06143	7	7	7	28.1857	26.0064	26.6707	28.1853	27.686	27.2264						7	7	7	11.5	11.5	11.5	117.56	0	49.449	1157700000	12	6	6	6	6	6	4	6	6	6	6
tr|B2APU5|B2APU5_PODAN 2-oxoisovalerate dehydrogenase subunit alpha OS=Podospora anserina (strain S / ATCC MYA-4624 / DSM 980 / FGSC 10383) OX=515849 GN=PODANS_4_6250 PE=3 SV=1	B2APU5	B2APU5	like PDHA1	alpha-ketoglutarate E1 dehydrogenase			0.976429	0.934588	1.02299	0.0293799	0.0327854	0.0873548	0.0327854	0.0873548	5	5	5	28.2035	27.8518	27.6546	27.3663	27.902	28.54						5	5	5	15.4	15.4	15.4	50.857	0	57.652	1576700000	18	5	5	5	4	5	5	5	5	5	4
tr|B2ARN9|B2ARN9_PODAN Podospora anserina S mat+ genomic DNA chromosome 4, supercontig 4 OS=Podospora anserina (strain S / ATCC MYA-4624 / DSM 980 / FGSC 10383) OX=515849 GN=PODANS_4_6880 PE=4 SV=1	B2ARN9	B2ARN9	Rpl27	Mitoribosomal protein mL41		+	0.189	0.00170239	5.98503	2.76894	2.58136	7.48654	2.58136	7.48654	1	1	1	22.6514	22.0739	22.9838	25.5878	24.893	24.9723					KO_0h_WT_0h	1	1	1	13.4	13.4	13.4	9.4168	0	3.4085	133800000	5	1	1	1	1	1	1	1	1	1	1
tr|A0A090CCG8|A0A090CCG8_PODAN Uncharacterized protein OS=Podospora anserina (strain S / ATCC MYA-4624 / DSM 980 / FGSC 10383) OX=515849 PE=4 SV=1	A0A090CCG8	A0A090CCG8	LMBD1	From Ubiquitin-like domain superfamily and BAG superfamily		+	0.18	0.00181851	4.47279	2.74028	2.16117	7.35677	2.16117	7.35677	1	1	1	22.1616	22.7654	22.6812	24.5037	24.442	25.146					KO_0h_WT_0h	1	1	1	3.6	3.6	3.6	40.509	0	12.134	102250000	5	1	1	1	1	1	1	1	1	1	1
tr|B2B5M3|B2B5M3_PODAN Podospora anserina S mat+ genomic DNA chromosome 2, supercontig 2 OS=Podospora anserina (strain S / ATCC MYA-4624 / DSM 980 / FGSC 10383) OX=515849 GN=PODANS_2_5120 PE=4 SV=1	B2B5M3	B2B5M3	Armc4	Armadillo repeat containing 4; Ciliary protein that may be involved in a late step of axonemal outer dynein arm assembly			0.417285	0.108363	25.2017	0.96512	4.65545	2.06073	4.65545	2.06073	1	1	1	15.6994	17.9571	17.8152	17.5372	23.9991	23.9017						1	1	1	2.5	2.5	2.5	60.487	0	7.1936	33115000	2	0	1	1	1	1	1	0	1	1	1
tr|B2A8Y5|B2A8Y5_PODAN Podospora anserina S mat+ genomic DNA chromosome 1, supercontig 1 OS=Podospora anserina (strain S / ATCC MYA-4624 / DSM 980 / FGSC 10383) OX=515849 GN=PODANS_1_7820 PE=4 SV=1	B2A8Y5	B2A8Y5	Rpl44	Mitochondrial LSU ribosomal protein L44 with MRP_L53 domain		+	0.272889	0.00992432	4.03809	2.0033	2.01367	4.61419	2.01367	4.61419	5	5	5	24.2661	24.2799	25.3878	26.8573	26.2019	26.9156					KO_0h_WT_0h	5	5	5	60.2	60.2	60.2	10.924	0	27.524	409800000	20	3	3	5	5	5	5	3	3	5	5
tr|B2APB0|B2APB0_PODAN Podospora anserina S mat+ genomic DNA chromosome 7, supercontig 3 OS=Podospora anserina (strain S / ATCC MYA-4624 / DSM 980 / FGSC 10383) OX=515849 GN=PODANS_7_20 PE=3 SV=1	B2APB0	B2APB0	Atp5g2	ATP synthase, H+ transporting, mitochondrial F0 complex, subunit C2 (subunit 9)			0.464698	0.140559	1.4258	0.852141	0.511774	1.83409	0.511774	1.83409	1	1	1	30.2999	29.9916	30.0541	30.1056	30.944	30.8313						1	1	1	10.9	10.9	10.9	14.849	0	30.06	10695000000	37	1	1	1	1	1	1	1	1	1	1
tr|B2B1C3|B2B1C3_PODAN Podospora anserina S mat+ genomic DNA chromosome 3, supercontig 2 OS=Podospora anserina (strain S / ATCC MYA-4624 / DSM 980 / FGSC 10383) OX=515849 GN=PODANS_3_8980 PE=4 SV=1	B2B1C3	B2B1C3	Ndua4	Domain of MLRQ subunit of mitochondrial NADH-ubiquinone reductase complex I see PMID: 28988874		+	0.221333	0.00390996	3.7848	2.40783	1.92022	5.98849	1.92022	5.98849	1	1	1	25.3358	25.9122	26.3361	27.5235	27.8304	27.9907					KO_0h_WT_0h	1	1	1	16.5	16.5	16.5	10.288	0	51.149	888520000	24	1	1	1	1	1	1	1	1	1	1
tr|B2B564|B2B564_PODAN Podospora anserina S mat+ genomic DNA chromosome 2, supercontig 2 OS=Podospora anserina (strain S / ATCC MYA-4624 / DSM 980 / FGSC 10383) OX=515849 GN=PODANS_2_3640 PE=4 SV=1	B2B564	B2B564	?	Contains SAP motif, found in RNA processing proteins		+	0.371718	0.0310962	3.49186	1.50729	1.804	3.25947	1.804	3.25947	2	2	2	24.517	24.1073	25.8958	26.4103	26.7526	26.7691					KO_0h_WT_0h	2	2	2	7.5	7.5	7.5	40.093	0	9.1646	421140000	7	1	1	2	2	2	1	1	1	2	2
tr|B2ACX4|B2ACX4_PODAN Podospora anserina S mat+ genomic DNA chromosome 3, supercontig 3 OS=Podospora anserina (strain S / ATCC MYA-4624 / DSM 980 / FGSC 10383) OX=515849 GN=PODANS_3_11170 PE=3 SV=1	B2ACX4	B2ACX4		Biotin synthase domain; This radical SAM enzyme employs one cofactor, iron-sulfur.			0.589672	0.269952	19.2146	0.568714	4.26413	1.27933	4.26413	1.27933	1	1	1	25.5435	15.6994	25.8398	26.7188	26.4419	26.7144						1	1	1	6.3	6.3	6.3	44.833	0	9.5911	420670000	5	1	0	1	1	1	1	1	0	1	1
tr|B2A8X0|B2A8X0_PODAN Podospora anserina S mat+ genomic DNA chromosome 1, supercontig 1 OS=Podospora anserina (strain S / ATCC MYA-4624 / DSM 980 / FGSC 10383) OX=515849 GN=PODANS_1_7670 PE=3 SV=1	B2A8X0	B2A8X0	CANX	Calnexin; Calcium-binding protein that interacts with newly synthesized glycoproteins in the endoplasmic reticulum. It may act in assisting protein assembly and/or in the retention within the ER of unassembled protein subunits. It seems to play a major role in the quality control apparatus of the ER by the retention of incorrectly folded proteins.			0.931367	0.750187	0.925959	0.12483	-0.11098	-0.341108	-0.11098	-0.341108	3	3	3	27.1592	27.3649	27.8083	26.8483	27.3991	27.7522						3	3	3	4.2	4.2	4.2	63.574	0	28.404	1081600000	35	3	3	3	2	3	2	3	3	3	2
tr|B2ALX5|B2ALX5_PODAN Podospora anserina S mat+ genomic DNA chromosome 1, supercontig 3 OS=Podospora anserina (strain S / ATCC MYA-4624 / DSM 980 / FGSC 10383) OX=515849 GN=PODANS_1_13140 PE=4 SV=1	B2ALX5	B2ALX5	CPS1 or CAD	Carbamoyl-phosphate synthetase 2, aspartate transcarbamylase, and dihydroorotase			0.55947	0.240405	1.74543	0.619057	0.803582	1.37752	0.803582	1.37752	3	3	3	23.0827	23.9915	25.0295	24.8688	25.0898	24.5558						3	3	3	3	3	3	129.01	0	12.747	150820000	7	2	2	1	1	1	2	2	2	1	1
tr|A0A090CUQ7|A0A090CUQ7_PODAN Putative Carboxymethylenebutenolidase OS=Podospora anserina (strain S / ATCC MYA-4624 / DSM 980 / FGSC 10383) OX=515849 PE=4 SV=1	A0A090CUQ7	A0A090CUQ7	Cmbl	Carboxymethylenebutenolidase-like (Pseudomonas); Cysteine hydrolase			0.486224	0.150993	0.91014	0.821042	-0.135839	-1.77253	-0.135839	-1.77253	5	5	5	28.6512	28.5312	28.6963	28.6074	28.4236	28.4403						5	5	5	31.1	31.1	31.1	30.944	0	25.549	2377700000	27	4	4	4	4	5	4	4	4	4	4
tr|B2B654|B2B654_PODAN Podospora anserina S mat+ genomic DNA chromosome 2, supercontig 2 OS=Podospora anserina (strain S / ATCC MYA-4624 / DSM 980 / FGSC 10383) OX=515849 GN=PODANS_2_6760 PE=4 SV=1	B2B654	B2B654	Nop10	H/ACA ribonucleoprotein complex subunit NOP10, ribosome biogenesis, rRNA processing		+	0.104	0.00132142	3.27044	2.87896	1.70949	8.00394	1.70949	8.00394	1	1	1	20.6399	21.1892	21.1236	22.4859	22.6774	22.9179					KO_0h_WT_0h	1	1	1	17.7	17.7	17.7	7.1983	0	3.331	26815000	4	1	1	1	1	1	1	1	1	1	1
tr|B2ADM3|B2ADM3_PODAN Podospora anserina S mat+ genomic DNA chromosome 4, supercontig 1 OS=Podospora anserina (strain S / ATCC MYA-4624 / DSM 980 / FGSC 10383) OX=515849 GN=PODANS_4_1470 PE=4 SV=1	B2ADM3	B2ADM3	blast: CELA2B	Chymotrypsin-like elastase family member 2B			0.9987	0.98735	1.00376	0.00552906	0.00541051	0.0168682	0.00541051	0.0168682	9	9	9	33.4609	33.4665	33.5741	32.9041	33.6252	33.9884						9	9	9	61.4	61.4	61.4	10.452	0	107.96	74823000000	84	7	9	8	7	9	9	7	9	8	7
tr|B2B0N9|B2B0N9_PODAN Citrate synthase OS=Podospora anserina (strain S / ATCC MYA-4624 / DSM 980 / FGSC 10383) OX=515849 GN=PODANS_3_6780 PE=3 SV=1	B2B0N9	B2B0N9	CS	Citrate synthase			0.41925	0.116752	0.858096	0.932737	-0.22079	-1.99522	-0.22079	-1.99522	19	19	18	35.5677	35.3401	35.4578	35.297	35.3475	35.0588						19	19	18	44.9	44.9	42.6	52.308	0	323.31	263970000000	289	18	17	17	17	17	17	18	17	17	17
tr|B2ANM7|B2ANM7_PODAN Podospora anserina S mat+ genomic DNA chromosome 6, supercontig 4 OS=Podospora anserina (strain S / ATCC MYA-4624 / DSM 980 / FGSC 10383) OX=515849 GN=PODANS_6_10970 PE=4 SV=1	B2ANM7	B2ANM7	Cotl1	Coactosin-like 1 (Dictyostelium); Binds to F-actin in a calcium-independent manner. Has no direct effect on actin depolymerization. Acts as a chaperone for ALOX5 (5LO), influencing both its stability and activity in leukotrienes synthesis			0.920582	0.657131	1.10791	0.182348	0.147845	0.478719	0.147845	0.478719	1	1	1	22.5535	22.9815	23.3886	22.9664	23.5062	22.8947						1	1	1	7.6	7.6	7.6	15.819	0	3.4205	53327000	4	1	1	1	1	1	1	1	1	1	1
tr|B2APU3|B2APU3_PODAN Podospora anserina S mat+ genomic DNA chromosome 4, supercontig 4 OS=Podospora anserina (strain S / ATCC MYA-4624 / DSM 980 / FGSC 10383) OX=515849 GN=PODANS_4_6270 PE=4 SV=1	B2APU3	B2APU3	?	H/ACA ribonucleoprotein complex subunit GAR1 homologous, metallophosphatase DUF2433		+	0.267231	0.00954363	2.98031	2.02029	1.57546	4.66644	1.57546	4.66644	4	4	4	25.0888	25.0917	25.3545	27.3699	26.2615	26.6299					KO_0h_WT_0h	4	4	4	6.9	6.9	6.9	70.248	0	8.5614	472080000	8	1	3	2	4	2	2	1	3	2	4
tr|B2B7U7|B2B7U7_PODAN Podospora anserina S mat+ genomic DNA chromosome 2, supercontig 2 OS=Podospora anserina (strain S / ATCC MYA-4624 / DSM 980 / FGSC 10383) OX=515849 GN=PODANS_2_12310 PE=4 SV=1	B2B7U7	B2B7U7	Cox7a	Cytochrome c oxidase subunit VII		+	0.25275	0.00603795	2.8545	2.21911	1.51324	5.31202	1.51324	5.31202	3	3	3	28.1824	28.8124	29.0699	29.9939	30.2538	30.3568					KO_0h_WT_0h	3	3	3	30	30	30	8.0874	0	61.347	5064000000	53	3	3	3	3	3	3	3	3	3	3
tr|B2AYM6|B2AYM6_PODAN NADH-cytochrome b5 reductase OS=Podospora anserina (strain S / ATCC MYA-4624 / DSM 980 / FGSC 10383) OX=515849 GN=PODANS_1_11620 PE=3 SV=1	B2AYM6	B2AYM6	Cyp5r1	Cytochrome b5 reductase 1; NADH-cytochrome b5 reductases are involved in desaturation and elongation of fatty acids, cholesterol biosynthesis, drug metabolism, and, in erythrocyte, methemoglobin reduction			0.947445	0.797248	0.973767	0.0984068	-0.0383511	-0.274565	-0.0383511	-0.274565	11	11	11	30.7886	30.8855	31.1074	30.6955	31.0471	30.9239						11	11	11	36.7	36.7	36.7	37.851	0	136.16	12147000000	69	10	10	11	11	10	8	10	10	11	11
tr|B2AAU9|B2AAU9_PODAN Podospora anserina S mat+ genomic DNA chromosome 1, supercontig 1 OS=Podospora anserina (strain S / ATCC MYA-4624 / DSM 980 / FGSC 10383) OX=515849 GN=PODANS_1_5240 PE=4 SV=1	B2AAU9	B2AAU9	blast: SDHA	EthD domain, which has ferredoxin properties (PMID: 33663497)		+	0.295765	0.0132838	2.79869	1.87668	1.48475	4.23809	1.48475	4.23809	5	5	5	26.922	27.3956	26.8017	29.0978	28.0858	28.3899					KO_0h_WT_0h	5	5	5	36.7	36.7	36.7	17.007	0	161.81	1631800000	37	3	4	4	5	5	5	3	4	4	5
tr|B2AUD5|B2AUD5_PODAN Podospora anserina S mat+ genomic DNA chromosome 1, supercontig 4 OS=Podospora anserina (strain S / ATCC MYA-4624 / DSM 980 / FGSC 10383) OX=515849 GN=PODANS_1_18770 PE=4 SV=1	B2AUD5	B2AUD5	TRAPPC4	TRAPPC4 = sybindin, tethering ER-derived vesicles		+	0.365275	0.0393559	2.76282	1.40499	1.46614	3.01501	1.46614	3.01501	1	1	1	23.6939	22.57	24.2134	24.8903	24.976	25.0094					KO_0h_WT_0h	1	1	1	6	6	6	20.792	0.0056899	2.0336	137120000	10	1	1	1	1	1	1	1	1	1	1
tr|B2AL36|B2AL36_PODAN Podospora anserina S mat+ genomic DNA chromosome 5, supercontig 9 OS=Podospora anserina (strain S / ATCC MYA-4624 / DSM 980 / FGSC 10383) OX=515849 GN=PODANS_5_8590 PE=4 SV=1	B2AL36	B2AL36		Vacuolar protein sorting-associated protein 7, GPP34 homologous		+	0.27329	0.0112661	2.55549	1.94823	1.3536	4.44777	1.3536	4.44777	1	1	1	23.7076	23.757	24.1773	24.7062	25.4522	25.5443					KO_0h_WT_0h	1	1	1	6.3	6.3	6.3	38.837	0	118.38	169060000	3	1	1	1	1	1	1	1	1	1	1
tr|B2AAL9|B2AAL9_PODAN Podospora anserina S mat+ genomic DNA chromosome 1, supercontig 1 OS=Podospora anserina (strain S / ATCC MYA-4624 / DSM 980 / FGSC 10383) OX=515849 GN=PODANS_1_4470 PE=3 SV=1	B2AAL9	B2AAL9	Cyp51	Cytochrome P450, family 51; Catalyzes C14-demethylation of lanosterol; it transforms lanosterol into 4,4’-dimethyl cholesta-8,14,24-triene-3-beta-ol			0.94331	0.777841	1.06773	0.109109	0.0945536	0.301806	0.0945536	0.301806	4	4	4	26.7809	27.1317	26.3999	26.5507	26.7291	27.3164						4	4	4	10	10	10	59.725	0	11.462	727580000	7	4	4	4	4	4	4	4	4	4	4
tr|B2B7V1|B2B7V1_PODAN Podospora anserina S mat+ genomic DNA chromosome 2, supercontig 2 OS=Podospora anserina (strain S / ATCC MYA-4624 / DSM 980 / FGSC 10383) OX=515849 GN=PODANS_2_12350 PE=4 SV=1	B2B7V1	B2B7V1	blast: BAG3	?		+	0.322786	0.0229445	2.5181	1.63932	1.33234	3.59085	1.33234	3.59085	2	2	2	23.5656	23.6467	23.979	25.7547	24.7942	24.6395					KO_0h_WT_0h	2	2	2	36.1	36.1	36.1	8.0138	0	6.9072	153930000	6	2	1	2	2	2	2	2	1	2	2
tr|B2VLD9|B2VLD9_PODAN Dihydrolipoyl dehydrogenase OS=Podospora anserina (strain S / ATCC MYA-4624 / DSM 980 / FGSC 10383) OX=515849 GN=PODANS_5_5810 PE=3 SV=1	B2VLD9	B2VLD9	DLD	Dihydrolipoamide dehydrogenase; Lipoamide dehydrogenase is a component of the glycine cleavage system as well as of the alpha-ketoacid dehydrogenase complexes. Involved in the hyperactivation of spermatazoa during capacitation and in the spermatazoal acrosome reaction			0.836116	0.496135	0.892792	0.304401	-0.163605	-0.747825	-0.163605	-0.747825	15	15	15	32.5792	31.9277	32.1774	32.2545	32.0617	31.8775						15	15	15	35.4	35.4	35.4	53.95	0	323.31	28935000000	122	15	14	15	15	15	14	15	14	15	15
tr|B2B010|B2B010_PODAN Acetyltransferase component of pyruvate dehydrogenase complex OS=Podospora anserina (strain S / ATCC MYA-4624 / DSM 980 / FGSC 10383) OX=515849 GN=PODANS_3_2310 PE=3 SV=1	B2B010	B2B010	DLAT or PDHX	Dihydrolipoamide S-Acetyltransferase			0.884186	0.587293	0.915977	0.231146	-0.126616	-0.589369	-0.126616	-0.589369	10	10	10	32.2828	31.7473	32.152	32.1716	31.9503	31.6804						10	10	10	36.6	36.6	36.6	48.561	0	323.31	26205000000	118	10	10	10	10	10	9	10	10	10	10
tr|B2VL95|B2VL95_PODAN Podospora anserina S mat+ genomic DNA chromosome 5, supercontig 6 OS=Podospora anserina (strain S / ATCC MYA-4624 / DSM 980 / FGSC 10383) OX=515849 GN=PODANS_5_5370 PE=4 SV=1	B2VL95	B2VL95	DLST	Dihydrolipoamide S-succinyltransferase (E2 component of 2-oxo-glutarate complex)			0.839119	0.495289	0.906023	0.305142	-0.142381	-0.74939	-0.142381	-0.74939	10	10	10	32.5804	31.9718	32.3436	32.1287	32.2866	32.0534						10	10	10	28.8	28.8	28.8	45.954	0	189.34	30476000000	120	9	10	10	10	10	10	9	10	10	10
tr|A0A090CEV3|A0A090CEV3_PODAN Putative NADH-ubiquinone oxidoreductase 9.5 kDa subunit OS=Podospora anserina (strain S / ATCC MYA-4624 / DSM 980 / FGSC 10383) OX=515849 PE=4 SV=1	A0A090CEV3	A0A090CEV3		Putative NADH-ubiquinone oxidoreductase 9.5 kDa subunit		+	0.330741	0.0227132	2.4744	1.64372	1.30708	3.60222	1.30708	3.60222	4	4	4	25.2841	25.5492	25.8444	26.8129	26.3324	27.4536					KO_0h_WT_0h	4	4	4	48.8	48.8	48.8	9.0784	0	10.065	536400000	14	2	2	2	3	2	4	2	2	2	3
tr|B2B7V0|B2B7V0_PODAN Podospora anserina S mat+ genomic DNA chromosome 2, supercontig 2 OS=Podospora anserina (strain S / ATCC MYA-4624 / DSM 980 / FGSC 10383) OX=515849 GN=PODANS_2_12340 PE=4 SV=1	B2B7V0	B2B7V0	?	Putative Pantothenate transporter		+	0.268	0.00501193	2.43428	2.3	1.2835	5.59389	1.2835	5.59389	2	2	2	29.0427	29.737	29.4741	30.6523	30.5437	30.9083					KO_0h_WT_0h	2	2	2	24.7	24.7	24.7	10.339	0	61.596	7461600000	35	2	2	2	2	2	2	2	2	2	2
tr|B2AY44|B2AY44_PODAN Podospora anserina S mat+ genomic DNA chromosome 1, supercontig 2 OS=Podospora anserina (strain S / ATCC MYA-4624 / DSM 980 / FGSC 10383) OX=515849 GN=PODANS_1_9820 PE=4 SV=1	B2AY44	B2AY44		domain from ATP synthase subunit alpha, N-terminal domain-like superfamily or Riboflavin synthase-like beta-barrel, among which ferredoxin:NADP+ reductase and NADH:cytochrome c5 reductase exist			0.737719	0.380606	0.0699472	0.419525	-3.83759	-0.984504	-3.83759	-0.984504	2	2	2	27.0865	27.51	27.3774	15.6994	27.606	27.1557						2	2	2	9.5	9.5	9.5	25.087	0	4.9983	891680000	3	2	2	2	1	2	2	2	2	2	1
tr|A0A090CDL6|A0A090CDL6_PODAN Uncharacterized protein OS=Podospora anserina (strain S / ATCC MYA-4624 / DSM 980 / FGSC 10383) OX=515849 PE=3 SV=1	A0A090CDL6	A0A090CDL6	Lyrm2	domain from complex I LYR			0.494521	0.162035	0.331213	0.790392	-1.59417	-1.71214	-1.59417	-1.71214	2	2	2	21.6726	24.614	23.2484	22.3388	21.1233	21.2903						2	2	2	21.8	21.8	21.8	9.3488	0	2.7505	49139000	6	1	2	2	2	1	2	1	2	2	2
tr|B2AR53|B2AR53_PODAN Podospora anserina S mat+ genomic DNA chromosome 4, supercontig 4 OS=Podospora anserina (strain S / ATCC MYA-4624 / DSM 980 / FGSC 10383) OX=515849 GN=PODANS_4_8610 PE=4 SV=1	B2AR53	B2AR53	Ndubb	NADH:ubiquinone oxidoreductase, ESSS subunit		+	0.348884	0.0365274	2.37836	1.43738	1.24997	3.09132	1.24997	3.09132	4	4	4	26.1178	26.0867	26.0208	27.4221	26.5831	27.9701					KO_0h_WT_0h	4	4	4	33	33	33	12.786	0	11.845	762210000	21	3	3	2	4	4	4	3	3	2	4
tr|B2AWQ9|B2AWQ9_PODAN Podospora anserina S mat+ genomic DNA chromosome 7, supercontig 1 OS=Podospora anserina (strain S / ATCC MYA-4624 / DSM 980 / FGSC 10383) OX=515849 GN=PODANS_7_8000 PE=4 SV=1	B2AWQ9	B2AWQ9		domain from NAD(P)-binding domain superfamily, with a core Rossmann-type fold, which consists of three layers (alpha/beta/alpha) with parallel beta-sheet of 6 strands.			0.68143	0.324642	0.103213	0.488595	-3.2763	-1.12205	-3.2763	-1.12205	1	1	1	24.7868	25.0005	24.6486	24.4676	24.44	15.6994						1	1	1	3.9	3.9	3.9	33.546	0	3.0442	134770000	1	1	1	1	1	1	0	1	1	1	1
tr|B2B0D2|B2B0D2_PODAN Podospora anserina S mat+ genomic DNA chromosome 3, supercontig 2 OS=Podospora anserina (strain S / ATCC MYA-4624 / DSM 980 / FGSC 10383) OX=515849 GN=PODANS_3_5290 PE=4 SV=1	B2B0D2	B2B0D2		domain from Peptidase S8 propeptide/proteinase inhibitor I9 superfamily			0.816258	0.446624	1.17018	0.350058	0.226733	0.843127	0.226733	0.843127	2	2	2	25.6747	25.9638	26.4332	25.9447	26.3908	26.4165						2	2	2	26.5	26.5	26.5	11.028	0	15.752	451770000	17	2	2	2	2	2	2	2	2	2	2
tr|B2AS86|B2AS86_PODAN Podospora anserina S mat+ genomic DNA chromosome 1, supercontig 6 OS=Podospora anserina (strain S / ATCC MYA-4624 / DSM 980 / FGSC 10383) OX=515849 GN=PODANS_1_22680 PE=4 SV=1	B2AS86	B2AS86		domain from Protein PRRC2 (proline-rich and coiled-coil-containing protein 2, also known as BAT2); may play a role in the regulation of pre-mRNA splicing			0.606908	0.277925	1.66364	0.556073	0.734341	1.25462	0.734341	1.25462	1	1	1	22.8558	24.0741	23.6675	25.191	23.7556	23.8539						1	1	1	4.7	4.7	4.7	25.35	0	5.6396	106210000	2	1	1	1	1	1	1	1	1	1	1
tr|B2AWS7|B2AWS7_PODAN Podospora anserina S mat+ genomic DNA chromosome 7, supercontig 1 OS=Podospora anserina (strain S / ATCC MYA-4624 / DSM 980 / FGSC 10383) OX=515849 GN=PODANS_7_8180 PE=4 SV=1	B2AWS7	B2AWS7	Ndufa6	NADH dehydrogenase (ubiquinone) 1 alpha subcomplex 6		+	0.350667	0.032557	2.28885	1.48736	1.19462	3.21103	1.19462	3.21103	4	4	4	27.3652	28.3335	28.2793	29.26	28.8114	29.4904					KO_0h_WT_0h	4	4	4	41.9	41.9	41.9	14.629	0	20.069	2705100000	44	4	4	4	3	3	4	4	4	4	3
tr|B2ASX5|B2ASX5_PODAN Podospora anserina S mat+ genomic DNA chromosome 6, supercontig 1 OS=Podospora anserina (strain S / ATCC MYA-4624 / DSM 980 / FGSC 10383) OX=515849 GN=PODANS_6_11520 PE=4 SV=1	B2ASX5	B2ASX5	Blast: ispH	4-hydroxy-3-methylbut-2-enyl diphosphate reductase; biosynthesis of terpenes		+	0.341871	0.0263349	2.2523	1.57947	1.1714	3.43829	1.1714	3.43829	4	4	4	28.4145	29.3711	29.374	29.9991	30.2732	30.4014					KO_0h_WT_0h	4	4	4	32.7	32.7	32.7	11.025	0	144.81	5566400000	60	4	4	4	4	4	4	4	4	4	4
tr|B2AMI1|B2AMI1_PODAN Podospora anserina S mat+ genomic DNA chromosome 5, supercontig 8 OS=Podospora anserina (strain S / ATCC MYA-4624 / DSM 980 / FGSC 10383) OX=515849 GN=PODANS_5_6880 PE=4 SV=1	B2AMI1	B2AMI1		domain from Subtilisin DY-like, domain			0.931192	0.726282	0.941288	0.138895	-0.0872924	-0.375602	-0.0872924	-0.375602	3	3	3	27.2447	27.4034	26.897	26.7843	27.0984	27.4006						3	3	3	4.7	4.7	4.7	83.867	0	6.9555	897960000	11	3	3	3	3	2	2	3	3	3	3
tr|A0A090D5S4|A0A090D5S4_PODAN Uncharacterized protein OS=Podospora anserina (strain S / ATCC MYA-4624 / DSM 980 / FGSC 10383) OX=515849 PE=4 SV=1	A0A090D5S4	A0A090D5S4		domain from Thioredoxin-like superfamily or from Alkyl hydroperoxide reductase subunit C/ Thiol specific antioxidant (Peroxiredoxin)			0.690447	0.335151	0.74274	0.47476	-0.429071	-1.09468	-0.429071	-1.09468	4	4	4	27.5095	27.4739	27.1621	26.2144	27.1974	27.4465						4	4	4	11.2	11.2	11.2	31.306	0	17.549	942320000	26	3	3	2	2	2	2	3	3	2	2
tr|A0A090CFL2|A0A090CFL2_PODAN Uncharacterized protein OS=Podospora anserina (strain S / ATCC MYA-4624 / DSM 980 / FGSC 10383) OX=515849 PE=4 SV=1	A0A090CFL2	A0A090CFL2		domain from Tuberculosis necrotizing toxin; induces necrosis of infected cells to evade immune responses and killing macrophages; acts via hydrolysis of the essential cellular coenzyme NAD+ in the cytosol.			0.583946	0.260002	3.75992	0.585023	1.9107	1.31117	1.9107	1.31117	1	1	1	21.8791	21.5977	23.1351	21.3579	25.4648	25.5213						1	1	1	4.8	4.8	4.8	26.832	0.0050143	2.0875	113400000	4	1	1	1	1	1	1	1	1	1	1
tr|B2AT34|B2AT34_PODAN Podospora anserina S mat+ genomic DNA chromosome 1, supercontig 4 OS=Podospora anserina (strain S / ATCC MYA-4624 / DSM 980 / FGSC 10383) OX=515849 GN=PODANS_1_14540 PE=4 SV=1	B2AT34	B2AT34	Ndufa2	NADH dehydrogenase (ubiquinone) 1 alpha subcomplex, 2		+	0.262364	0.00845558	2.16725	2.07286	1.11587	4.83093	1.11587	4.83093	5	5	5	27.6264	28.1139	28.351	29.2429	28.9692	29.2267					KO_0h_WT_0h	5	5	5	47.4	47.4	47.4	10.616	0	16.497	2629100000	41	3	4	4	4	4	4	3	4	4	4
tr|B2AR06|B2AR06_PODAN Podospora anserina S mat+ genomic DNA chromosome 4, supercontig 4 OS=Podospora anserina (strain S / ATCC MYA-4624 / DSM 980 / FGSC 10383) OX=515849 GN=PODANS_4_9060 PE=4 SV=1	B2AR06	B2AR06	Ndua1	NADH dehydrogenase [ubiquinone] (complex I), alpha subcomplex subunit 1		+	0.347333	0.0258057	2.12461	1.58829	1.0872	3.46051	1.0872	3.46051	2	2	2	26.4154	26.5397	26.6971	27.5899	27.1381	28.1858					KO_0h_WT_0h	2	2	2	30.2	30.2	30.2	9.67	0	14.105	950910000	21	2	2	2	2	2	2	2	2	2	2
tr|A0A090CVB0|A0A090CVB0_PODAN Uncharacterized protein OS=Podospora anserina (strain S / ATCC MYA-4624 / DSM 980 / FGSC 10383) OX=515849 PE=3 SV=1	A0A090CVB0	A0A090CVB0	Otc	Aspartate/ornithine carbamoyltransferase activity		+	0.325867	0.0187963	2.04001	1.72593	1.02857	3.81888	1.02857	3.81888	4	4	4	24.8188	25.1919	25.424	26.1229	26.5488	25.8488					KO_0h_WT_0h	4	4	4	1.7	1.7	1.7	242.02	0	5.6408	344620000	2	3	3	3	3	2	3	3	3	3	3
tr|B2B5R1|B2B5R1_PODAN Podospora anserina S mat+ genomic DNA chromosome 2, supercontig 2 OS=Podospora anserina (strain S / ATCC MYA-4624 / DSM 980 / FGSC 10383) OX=515849 GN=PODANS_2_5510 PE=4 SV=1	B2B5R1	B2B5R1	?	NADH dehydrogenase [ubiquinone] 1 beta subcomplex subunit 2		+	0.34227	0.0159788	2.02878	1.79646	1.02061	4.01134	1.02061	4.01134	4	4	4	27.9587	28.529	28.6965	29.402	29.2111	29.6329					KO_0h_WT_0h	4	4	4	43.1	43.1	43.1	6.7929	0	15.209	3246600000	43	4	4	4	4	4	4	4	4	4	4
sp|P20682|COX2_PODAN Cytochrome c oxidase subunit 2 OS=Podospora anserina (strain S / ATCC MYA-4624 / DSM 980 / FGSC 10383) OX=515849 GN=COII PE=3 SV=1	P20682	P20682	Cox2	Cytochrome c oxidase subunit 2, contains dinuclear copper A center		+	0.2405	0.00849635	2.00468	2.07077	1.00337	4.82431	1.00337	4.82431	3	3	3	29.2724	29.4762	29.6166	30.4047	30.1728	30.7978					KO_0h_WT_0h	3	3	3	16	16	16	28.541	0	166.24	6719700000	54	3	3	3	3	3	3	3	3	3	3
tr|B2AMD3|B2AMD3_PODAN Podospora anserina S mat+ genomic DNA chromosome 5, supercontig 8 OS=Podospora anserina (strain S / ATCC MYA-4624 / DSM 980 / FGSC 10383) OX=515849 GN=PODANS_5_7600 PE=4 SV=1	B2AMD3	B2AMD3	-	Uncharacterized protein YOR389W-like, putative serine kinase; integral membrane protein		+	0.365753	0.0315815	1.98504	1.50057	0.989171	3.24309	0.989171	3.24309	2	2	2	23.4464	24.0816	24.4937	24.9741	25.0267	24.9884					KO_0h_WT_0h	2	2	2	5	5	5	54.722	0	5.4623	153230000	9	2	2	2	2	2	2	2	2	2	2
tr|B2B6I3|B2B6I3_PODAN Podospora anserina S mat+ genomic DNA chromosome 2, supercontig 2 OS=Podospora anserina (strain S / ATCC MYA-4624 / DSM 980 / FGSC 10383) OX=515849 GN=PODANS_2_7870 PE=4 SV=1	B2B6I3	B2B6I3	Acsm3	Acyl-CoA synthetase medium-chain family member 3; Has medium-chain fatty acid:CoA ligase activity with broad substrate specificity		+	0.350635	0.0361909	1.96312	1.4414	0.973148	3.10086	0.973148	3.10086	16	16	16	27.808	28.3662	28.5489	28.9191	29.0767	29.6467					KO_0h_WT_0h	16	16	16	8.2	8.2	8.2	285.11	0	87.621	2891300000	36	9	13	13	13	9	10	9	13	13	13
tr|B2AZ51|B2AZ51_PODAN Podospora anserina S mat+ genomic DNA chromosome 3, supercontig 2 OS=Podospora anserina (strain S / ATCC MYA-4624 / DSM 980 / FGSC 10383) OX=515849 GN=PODANS_3_4140 PE=4 SV=1	B2AZ51	B2AZ51	Ephx2	Epoxide hydrolase 2, cytoplasmic; Bifunctional enzyme. The C-terminal domain has epoxide hydrolase activity and acts on epoxides (alkene oxides, oxiranes) and arene oxides.			0.628969	0.299316	1.11672	0.52387	0.159266	1.19151	0.159266	1.19151	2	2	2	24.6764	25.0126	24.9778	25.1526	25.1021	24.8899						2	2	2	15	15	15	24.164	0	3.2947	198100000	3	1	2	2	1	1	1	1	2	2	1
tr|B2AX08|B2AX08_PODAN Podospora anserina S mat+ genomic DNA chromosome 7, supercontig 1 OS=Podospora anserina (strain S / ATCC MYA-4624 / DSM 980 / FGSC 10383) OX=515849 GN=PODANS_7_8930 PE=3 SV=1	B2AX08	B2AX08	Timm13	Translocase of inner mitochondrial membrane 13; Mitochondrial intermembrane chaperone that participates in the import and insertion of some multi-pass transmembrane proteins into the mitochondrial inner membrane. Also required for the transfer of beta-barrel precursors from the TOM complex to the sorting and assembly machinery (SAM complex) of the outer membrane. Acts as a chaperone-like protein …		+	0.312952	0.0169874	1.9562	1.76987	0.968051	3.93807	0.968051	3.93807	5	5	5	26.4589	26.884	27.0855	28.0895	27.5444	27.6986					KO_0h_WT_0h	5	5	5	78.6	78.6	78.6	9.1593	0	174.54	1057700000	31	3	4	4	4	4	5	3	4	4	4
tr|B2AZA8|B2AZA8_PODAN Podospora anserina S mat+ genomic DNA chromosome 3, supercontig 2 OS=Podospora anserina (strain S / ATCC MYA-4624 / DSM 980 / FGSC 10383) OX=515849 GN=PODANS_3_3090 PE=4 SV=1	B2AZA8	B2AZA8	-	Proteinase inhibitor I13, potato inhibitor I			0.398036	0.0514797	3.27726	1.28836	1.71249	2.74801	1.71249	2.74801	3	3	3	24.3655	24.0819	22.4271	25.2598	25.122	25.6301						3	3	3	48.8	48.8	48.8	9.2954	0	9.265	173630000	14	3	3	3	3	3	3	3	3	3	3
tr|B2B7C8|B2B7C8_PODAN Podospora anserina S mat+ genomic DNA chromosome 2, supercontig 2 OS=Podospora anserina (strain S / ATCC MYA-4624 / DSM 980 / FGSC 10383) OX=515849 GN=PODANS_2_10670 PE=4 SV=1	B2B7C8	B2B7C8	Ggt1	Gamma-glutamyltransferase 1; Cleaves the gamma-glutamyl bond of extracellular glutathione (gamma-Glu-Cys-Gly), glutathione conjugates, and other gamma-glutamyl compounds. The metabolism of glutathione releases free glutamate and the dipeptide, cysteinyl-glycine, which is hydrolyzed to cysteine and glycine by dipeptidases.			0.704402	0.350289	0.808453	0.455574	-0.306764	-1.05659	-0.306764	-1.05659	9	9	9	30.5309	30.8542	30.4504	29.8845	30.7884	30.2424						9	9	9	20.1	20.1	20.1	64.15	0	65.521	9348300000	56	7	8	9	6	9	7	7	8	9	6
tr|B2B4A5|B2B4A5_PODAN Geranylgeranyl pyrophosphate synthetase involved in carotenoid biosynthesis encoded by the PaAl3 protein OS=Podospora anserina (strain S / ATCC MYA-4624 / DSM 980 / FGSC 10383) OX=515849 GN=PODANS_2_610 PE=3 SV=1	B2B4A5	B2B4A5		Geranylgeranyl pyrophosphate synthetase involved in carotenoid biosynthesis			0.955618	0.83743	1.03782	0.0770513	0.0535571	0.218918	0.0535571	0.218918	11	11	11	30.3646	30.602	30.9984	30.3918	30.9091	30.8248						11	11	11	30.8	30.8	30.8	52.075	0	102.62	10570000000	80	9	10	10	9	10	9	9	10	10	9
tr|B2ASK9|B2ASK9_PODAN Podospora anserina S mat+ genomic DNA chromosome 1, supercontig 6 OS=Podospora anserina (strain S / ATCC MYA-4624 / DSM 980 / FGSC 10383) OX=515849 GN=PODANS_1_23830 PE=4 SV=1	B2ASK9	B2ASK9	Gmfb	Glia maturation factor, beta; This protein causes differentiation of brain cells, stimulation of neural regeneration, and inhibition of proliferation of tumor cells			0.97573	0.92954	1.01277	0.031732	0.0183016	0.0941203	0.0183016	0.0941203	2	2	2	26.0953	26.3383	25.699	26.1589	25.9663	26.0623						2	2	2	20.1	20.1	20.1	15.976	0	5.6206	421560000	7	2	1	1	1	1	1	2	1	1	1
tr|B2ASF1|B2ASF1_PODAN Podospora anserina S mat+ genomic DNA chromosome 1, supercontig 6 OS=Podospora anserina (strain S / ATCC MYA-4624 / DSM 980 / FGSC 10383) OX=515849 GN=PODANS_1_23310 PE=3 SV=1	B2ASF1	B2ASF1		Putative fatty acid synthase subunit alpha			0.399791	0.0548942	3.47442	1.26047	1.79677	2.68585	1.79677	2.68585	2	2	2	20.3938	22.1324	22.1089	23.5937	23.7645	22.6673						2	2	2	1.4	1.4	1.4	204.77	0	6.358	44069000	3	2	1	2	2	2	2	2	1	2	2
tr|B2AC18|B2AC18_PODAN Podospora anserina S mat+ genomic DNA chromosome 2, supercontig 3 OS=Podospora anserina (strain S / ATCC MYA-4624 / DSM 980 / FGSC 10383) OX=515849 GN=PODANS_2_13790 PE=4 SV=1	B2AC18	B2AC18		NADH dehydrogenase [ubiquinone] 1 beta subcomplex subunit 7			0.401231	0.0561657	2.17206	1.25053	1.11906	2.66383	1.11906	2.66383	3	3	3	26.2731	26.8253	26.7547	27.6053	27.1497	28.4553						3	3	3	35.6	35.6	35.6	10.215	0	11.163	1034300000	12	2	3	2	3	2	3	2	3	2	3
tr|B2AVQ0|B2AVQ0_PODAN Glutathione synthetase OS=Podospora anserina (strain S / ATCC MYA-4624 / DSM 980 / FGSC 10383) OX=515849 GN=PODANS_7_2180 PE=3 SV=1	B2AVQ0	B2AVQ0	GSS	Glutathione synthetase			0.92463	0.670912	0.768002	0.173335	-0.380818	-0.457723	-0.380818	-0.457723	2	2	2	26.4099	25.455	24.1033	25.5107	23.957	25.3581						2	2	2	5.7	5.7	5.7	58.305	0	16.785	263740000	4	1	1	1	1	2	1	1	1	1	1
tr|A0A090D4A1|A0A090D4A1_PODAN Aminomethyltransferase OS=Podospora anserina (strain S / ATCC MYA-4624 / DSM 980 / FGSC 10383) OX=515849 PE=3 SV=1	A0A090D4A1	A0A090D4A1	AMT	glycine breakdown			0.929365	0.706477	1.03194	0.150902	0.0453657	0.404595	0.0453657	0.404595	8	8	8	29.8218	29.5911	29.7081	29.5853	29.8949	29.7769						8	8	8	22.1	22.1	22.1	52.183	0	59.911	5358400000	31	6	7	7	6	6	6	6	7	7	6
tr|B2ADD0|B2ADD0_PODAN Podospora anserina S mat+ genomic DNA chromosome 4, supercontig 1 OS=Podospora anserina (strain S / ATCC MYA-4624 / DSM 980 / FGSC 10383) OX=515849 GN=PODANS_4_755 PE=4 SV=1	B2ADD0	B2ADD0		Cytochrome c oxidase subunit 9, mitochondrial			0.3943	0.0568162	2.25536	1.24553	1.17336	2.65279	1.17336	2.65279	3	3	3	27.6875	27.4952	28.19	28.9092	28.3166	29.667						3	3	3	25	25	25	7.5187	0	8.9023	2450400000	29	3	3	3	3	3	3	3	3	3	3
tr|B2B270|B2B270_PODAN Podospora anserina S mat+ genomic DNA chromosome 6, supercontig 2 OS=Podospora anserina (strain S / ATCC MYA-4624 / DSM 980 / FGSC 10383) OX=515849 GN=PODANS_6_5750 PE=3 SV=1	B2B270	B2B270	HSPD1	Heat shock protein 1 (chaperonin); Implicated in mitochondrial protein import and macromolecular assembly.			0.490764	0.158505	0.777159	0.799956	-0.363718	-1.73096	-0.363718	-1.73096	20	20	20	31.9347	31.8133	31.9311	31.9078	31.4823	31.1978						20	20	20	45.9	45.9	45.9	61.131	0	155.39	21601000000	109	19	18	19	18	15	15	19	18	19	18
tr|B2AR88|B2AR88_PODAN Podospora anserina S mat+ genomic DNA chromosome 4, supercontig 4 OS=Podospora anserina (strain S / ATCC MYA-4624 / DSM 980 / FGSC 10383) OX=515849 GN=PODANS_4_8280 PE=4 SV=1	B2AR88	B2AR88	-	Alpha/Beta hydrolase fold, Xaa-Pro dipeptidyl-peptidase-like domain			0.387906	0.0588277	2.01815	1.23042	1.01303	2.61954	1.01303	2.61954	1	1	1	23.348	24.6556	24.2498	25.111	25.0672	25.1143						1	1	1	3.3	3.3	3.3	48.459	0	4.9729	164770000	4	1	1	1	1	1	1	1	1	1	1
tr|B2AFQ4|B2AFQ4_PODAN Kynurenine 3-monooxygenase OS=Podospora anserina (strain S / ATCC MYA-4624 / DSM 980 / FGSC 10383) OX=515849 GN=BNA4 PE=3 SV=1	B2AFQ4	B2AFQ4	Kmo	Hypothetical protein; Catalyzes the hydroxylation of L-kynurenine (L-Kyn) to form 3-hydroxy-L-kynurenine (L-3OHKyn). Required for synthesis of quinolinic acid			0.553204	0.231161	11.5607	0.636086	3.53115	1.41069	3.53115	1.41069	1	1	1	23.2213	15.6994	23.1713	24.107	24.5151	24.0632						1	1	1	3.9	3.9	3.9	58.006	0	8.9024	78800000	4	1	0	1	1	1	1	1	0	1	1
tr|B2AT08|B2AT08_PODAN Podospora anserina S mat+ genomic DNA chromosome 6, supercontig 1 OS=Podospora anserina (strain S / ATCC MYA-4624 / DSM 980 / FGSC 10383) OX=515849 GN=PODANS_6_11850 PE=3 SV=1	B2AT08	B2AT08		Mitochondrial SSU ribosomal protein S19			0.38003	0.0602023	2.68744	1.22039	1.42623	2.59756	1.42623	2.59756	3	3	3	24.1029	23.8535	23.6506	26.3378	24.5793	24.9685						3	3	3	40.7	40.7	40.7	10.367	0	7.823	189060000	7	1	2	2	3	2	2	1	2	2	3
tr|A0A090CMA7|A0A090CMA7_PODAN Putative NADH-ubiquinone oxidoreductase 78 kDa subunit mitochondrial OS=Podospora anserina (strain S / ATCC MYA-4624 / DSM 980 / FGSC 10383) OX=515849 PE=3 SV=1	A0A090CMA7	A0A090CMA7	NDUFS1	iron-sulfur-containing			0.775433	0.412217	0.172998	0.384875	-2.53117	-0.914451	-2.53117	-0.914451	2	2	2	24.0172	23.7213	23.5342	15.6994	24.1124	23.8674						2	2	2	2.5	2.5	2.5	84.312	0.0036496	2.3312	76396000	2	2	1	1	0	1	1	2	1	1	0
tr|B2AEI8|B2AEI8_PODAN Podospora anserina S mat+ genomic DNA chromosome 5, supercontig 1 OS=Podospora anserina (strain S / ATCC MYA-4624 / DSM 980 / FGSC 10383) OX=515849 GN=PODANS_5_2440 PE=4 SV=1	B2AEI8	B2AEI8		Acyltransferase MbtK/IucB-like conserved			0.37757	0.0608761	0.428308	1.21555	-1.22328	-2.587	-1.22328	-2.587	2	2	2	24.0266	23.1269	23.5593	22.1232	21.8037	23.116						2	2	2	3.9	3.9	3.9	57.979	0	3.2626	55930000	5	2	1	1	1	1	1	2	1	1	1
tr|B2B6Q1|B2B6Q1_PODAN Glutathione peroxidase OS=Podospora anserina (strain S / ATCC MYA-4624 / DSM 980 / FGSC 10383) OX=515849 GN=PODANS_2_8460 PE=3 SV=1	B2B6Q1	B2B6Q1	GPX7	Glutathione peroxidase 7; It protects esophageal epithelia from hydrogen peroxide- induced oxidative stress. It suppresses acidic bile acid-induced reactive oxigen species (ROS) and protects against oxidative DNA damage and double-strand breaks			0.379159	0.0617338	2.3213	1.20948	1.21494	2.57375	1.21494	2.57375	4	4	4	26.562	28.1102	27.6745	28.8285	28.6853	28.4778						4	4	4	26.1	26.1	26.1	18.054	0	9.2882	1885200000	28	3	3	4	4	4	4	3	3	4	4
tr|B2ADW0|B2ADW0_PODAN Podospora anserina S mat+ genomic DNA chromosome 4, supercontig 1 OS=Podospora anserina (strain S / ATCC MYA-4624 / DSM 980 / FGSC 10383) OX=515849 GN=PODANS_4_2230 PE=4 SV=1	B2ADW0	B2ADW0	MUC3A	Mucin-3a; Major glycoprotein component of a variety of mucus gels			0.91088	0.630731	1.23953	0.200156	0.309788	0.519663	0.309788	0.519663	3	3	3	26.8992	25.6137	25.1802	26.7316	25.6986	26.1923						3	3	3	5.6	5.6	5.6	75.04	0	10.557	457090000	6	3	3	3	3	3	2	3	3	3	3
tr|B2A9Y0|B2A9Y0_PODAN Podospora anserina S mat+ genomic DNA chromosome 1, supercontig 1 OS=Podospora anserina (strain S / ATCC MYA-4624 / DSM 980 / FGSC 10383) OX=515849 GN=PODANS_1_2160 PE=3 SV=1	B2A9Y0	B2A9Y0	Rps14	mutations in this gene can lead to resistance to emetine, a protein synthesis inhibitor			0.679281	0.321771	8.36945	0.492454	3.06513	1.12967	3.06513	1.12967	1	1	1	15.6994	23.4625	24.1663	24.2943	24.0951	24.1341						1	1	1	5.5	5.5	5.5	24.316	0	3.8395	87293000	4	0	1	1	1	1	1	0	1	1	1
tr|B2AFW8|B2AFW8_PODAN Peptide hydrolase OS=Podospora anserina (strain S / ATCC MYA-4624 / DSM 980 / FGSC 10383) OX=515849 GN=PODANS_0_1400 PE=3 SV=1	B2AFW8	B2AFW8	NAALAD2	N-acetylated alpha-linked acidic dipeptidase 2; Has N-acetylated-alpha-linked-acidic dipeptidase (NAALADase) activity. Also exhibits a dipeptidyl-peptidase IV type activity. Inactivate the peptide neurotransmitter N- acetylaspartylglutamate			0.554169	0.231025	0.039864	0.636341	-4.64877	-1.41119	-4.64877	-1.41119	1	1	1	27.0222	26.6909	26.9188	26.2381	15.6994	24.748						1	1	1	2.3	2.3	2.3	56	0.0014738	2.5059	478830000	5	1	1	1	1	0	1	1	1	1	1
tr|B2AT45|B2AT45_PODAN Podospora anserina S mat+ genomic DNA chromosome 1, supercontig 4 OS=Podospora anserina (strain S / ATCC MYA-4624 / DSM 980 / FGSC 10383) OX=515849 GN=PODANS_1_14630 PE=3 SV=1	B2AT45	B2AT45	Nags	N-acetylglutamate synthase; Plays a role in the regulation of ureagenesis by producing the essential cofactor N-acetylglutamate (NAG), thus modulating carbamoylphosphate synthase I (CPSI) activity			0.812288	0.453562	1.07164	0.343364	0.0998243	0.829288	0.0998243	0.829288	13	13	13	30.164	30.2171	30.4754	30.2518	30.4035	30.5006						13	13	13	17.7	17.7	17.7	96.357	0	78.516	8209600000	87	9	12	11	12	13	12	9	12	11	12
tr|B2AUH6|B2AUH6_PODAN Podospora anserina S mat+ genomic DNA chromosome 1, supercontig 4 OS=Podospora anserina (strain S / ATCC MYA-4624 / DSM 980 / FGSC 10383) OX=515849 GN=PODANS_1_19150 PE=4 SV=1	B2AUH6	B2AUH6	Snrpd1	Small nuclear ribonucleoprotein D1; Core component of the spliceosomal U1, U2, U4 and U5 small nuclear ribonucleoproteins (snRNPs), the building blocks of the spliceosome.			0.38902	0.0685998	2.03592	1.16368	1.02568	2.4747	1.02568	2.4747	1	1	1	25.388	25.2814	25.7817	27.2653	26.2633	25.9996						1	1	1	10.4	10.4	10.4	13.441	0	33.266	451320000	5	1	1	1	1	1	1	1	1	1	1
tr|A0A090CTW5|A0A090CTW5_PODAN Putative translation initiation factor 4 gamma OS=Podospora anserina (strain S / ATCC MYA-4624 / DSM 980 / FGSC 10383) OX=515849 PE=4 SV=1	A0A090CTW5	A0A090CTW5	eIF4G	Translation initiation factor 4 gamma			0.389548	0.0704638	2.37926	1.15203	1.25051	2.44976	1.25051	2.44976	1	1	1	21.8168	22.1496	22.7397	23.8205	22.6263	24.0109						1	1	1	0.8	0.8	0.8	164.71	0.0036603	2.348	53545000	4	1	1	1	1	1	1	1	1	1	1
tr|B2B1S6|B2B1S6_PODAN Podospora anserina S mat+ genomic DNA chromosome 6, supercontig 2 OS=Podospora anserina (strain S / ATCC MYA-4624 / DSM 980 / FGSC 10383) OX=515849 GN=PODANS_6_4310 PE=3 SV=1	B2B1S6	B2B1S6		Isoleucyl-tRNA synthetase			0.389556	0.073061	0.0427772	1.13631	-4.54701	-2.41622	-4.54701	-2.41622	3	3	3	25.0963	23.3102	20.8673	20.1845	15.6994	19.7489						3	3	3	4.1	4.1	4.1	124.31	0.00074405	2.6046	50256000	3	2	2	1	1	0	2	2	2	1	1
tr|B2B3I8|B2B3I8_PODAN Podospora anserina S mat+ genomic DNA chromosome 6, supercontig 2 OS=Podospora anserina (strain S / ATCC MYA-4624 / DSM 980 / FGSC 10383) OX=515849 GN=PODANS_6_6330 PE=4 SV=1	B2B3I8	B2B3I8		NADH:flavin oxidoreductase/NADH oxidase, N-terminal			0.465192	0.139798	1.40802	0.854499	0.493668	1.83877	0.493668	1.83877	13	13	13	30.7782	30.8499	30.4017	31.6296	30.9354	30.9458						13	13	13	29.8	29.8	29.8	42.517	0	120.58	12639000000	88	10	10	12	13	12	12	10	10	12	13
tr|B2B6S4|B2B6S4_PODAN Podospora anserina S mat+ genomic DNA chromosome 2, supercontig 2 OS=Podospora anserina (strain S / ATCC MYA-4624 / DSM 980 / FGSC 10383) OX=515849 GN=PODANS_2_8690 PE=4 SV=1	B2B6S4	B2B6S4	blast:	NADH:ubiquinone oxidoreductase 11.5kD subunit			0.418996	0.106362	2.71865	0.973212	1.44289	2.07718	1.44289	2.07718	4	4	4	25.7318	27.5963	27.594	28.7984	27.8007	28.6516						4	4	4	35.6	35.6	35.6	11.541	0	20.591	1583600000	35	4	4	3	4	4	4	4	4	3	4
tr|B2AYF9|B2AYF9_PODAN Inosine-5-monophosphate dehydrogenase OS=Podospora anserina (strain S / ATCC MYA-4624 / DSM 980 / FGSC 10383) OX=515849 GN=PODANS_1_10970 PE=3 SV=1	B2AYF9	B2AYF9		Inosine-5'-monophosphate dehydrogenase, metal-binding			0.385463	0.0733137	2.50334	1.13481	1.32385	2.41303	1.32385	2.41303	8	8	8	27.3333	29.1048	27.8872	29.76	29.2343	29.3026						8	8	8	20.5	20.5	20.5	56.645	0	97.504	3268000000	35	6	7	8	8	5	6	6	7	8	8
tr|B2AM80|B2AM80_PODAN Podospora anserina S mat+ genomic DNA chromosome 5, supercontig 8 OS=Podospora anserina (strain S / ATCC MYA-4624 / DSM 980 / FGSC 10383) OX=515849 GN=PODANS_5_6560 PE=4 SV=1	B2AM80	B2AM80		NADH dehydrogenase [ubiquinone] 1 alpha subcomplex subunit 13			0.389694	0.075676	2.00441	1.12104	1.00318	2.3838	1.00318	2.3838	5	5	5	28.2634	29.0115	29.2251	30.0956	29.2317	30.1823						5	5	5	43.3	43.3	43.3	13.894	0	25.947	4512200000	42	5	5	5	5	4	5	5	5	5	5
tr|B2B4L7|B2B4L7_PODAN Podospora anserina S mat+ genomic DNA chromosome 2, supercontig 2 OS=Podospora anserina (strain S / ATCC MYA-4624 / DSM 980 / FGSC 10383) OX=515849 GN=PODANS_2_1710 PE=4 SV=1	B2B4L7	B2B4L7		inositol-3-phosphate synthase activity			0.397966	0.0784792	73.0896	1.10525	6.19159	2.35042	6.19159	2.35042	2	2	2	15.6994	23.0404	15.6994	26.2815	23.5126	23.22						2	2	2	4.4	4.4	4.4	62.408	0	4.4006	111930000	2	1	1	0	1	1	1	1	1	0	1
tr|B2AFU0|B2AFU0_PODAN Podospora anserina S mat+ genomic DNA chromosome 6, supercontig 3 OS=Podospora anserina (strain S / ATCC MYA-4624 / DSM 980 / FGSC 10383) OX=515849 GN=PODANS_0_50 PE=4 SV=1	B2AFU0	B2AFU0	Ppt1	Palmitoyl-protein thioesterase 1; Removes thioester-linked fatty acyl groups such as palmitate from modified cysteine residues in proteins or peptides during lysosomal degradation.			0.555112	0.230835	1.08959	0.636699	0.123781	1.41188	0.123781	1.41188	2	2	2	27.2339	27.3003	27.073	27.3816	27.2143	27.3826						2	2	2	10.6	10.6	10.6	40.009	0	6.2619	969840000	12	2	2	2	2	2	2	2	2	2	2
tr|B2AZ90|B2AZ90_PODAN Podospora anserina S mat+ genomic DNA chromosome 3, supercontig 2 OS=Podospora anserina (strain S / ATCC MYA-4624 / DSM 980 / FGSC 10383) OX=515849 GN=PODANS_3_2940 PE=4 SV=1	B2AZ90	B2AZ90	Pm20d1	Peptidase M20 domain containing 1			0.883265	0.583357	0.887609	0.234065	-0.172003	-0.595845	-0.172003	-0.595845	13	13	13	30.577	30.7001	30.4621	29.8603	30.7865	30.5764						13	13	13	24.4	24.4	24.4	68.523	0	83.538	9270700000	78	12	12	12	12	12	10	12	12	12	12
tr|B2ANI8|B2ANI8_PODAN Phosphoglycerate kinase OS=Podospora anserina (strain S / ATCC MYA-4624 / DSM 980 / FGSC 10383) OX=515849 GN=PODANS_6_10610 PE=3 SV=1	B2ANI8	B2ANI8	Pgk1	Phosphoglycerate kinase 1			0.740294	0.379743	0.886804	0.420511	-0.173313	-0.986485	-0.173313	-0.986485	24	24	24	35.1156	34.6364	34.6937	34.5451	34.821	34.5597						24	24	24	67.9	67.9	67.9	44.876	0	323.31	172630000000	408	24	24	24	24	23	23	24	24	24	24
tr|A0A090D8Y7|A0A090D8Y7_PODAN Uncharacterized protein OS=Podospora anserina (strain S / ATCC MYA-4624 / DSM 980 / FGSC 10383) OX=515849 PE=4 SV=1	A0A090D8Y7	A0A090D8Y7	Lsm4	U6 snRNA-associated Sm-like protein			0.399508	0.0800075	87.9628	1.09687	6.45882	2.33279	6.45882	2.33279	2	2	2	15.6994	23.813	15.6994	24.3024	24.2384	26.0475						2	2	2	18.6	18.6	18.6	13.763	0	4.9399	124570000	6	0	1	0	1	2	1	0	1	0	1
tr|A0A090CFJ8|A0A090CFJ8_PODAN Putative phosphoribosylaminoimidazole-succinocarboxamide synthase OS=Podospora anserina (strain S / ATCC MYA-4624 / DSM 980 / FGSC 10383) OX=515849 PE=3 SV=1	A0A090CFJ8	A0A090CFJ8	Paics	Phosphoribosylaminoimidazole carboxylase, phosphoribosylaminoribosylaminoimidazole, succinocarboxamide synthetase; catalyzes steps 6 and 7 of purine biosynthesis			0.947705	0.809765	1.03039	0.091641	0.0431868	0.257128	0.0431868	0.257128	7	7	7	29.7903	29.906	29.9174	30.2404	29.7494	29.7534						7	7	7	29.7	29.7	29.7	33.862	0	44.485	6024500000	49	7	7	7	7	7	7	7	7	7	7
tr|B2A971|B2A971_PODAN Podospora anserina S mat+ genomic DNA chromosome 1, supercontig 1 OS=Podospora anserina (strain S / ATCC MYA-4624 / DSM 980 / FGSC 10383) OX=515849 GN=PODANS_1_8610 PE=4 SV=1	B2A971	B2A971	Polr1c	Polymerase (RNA) I polypeptide C; DNA-dependent RNA polymerase catalyzes the transcription of DNA into RNA using the four ribonucleoside triphosphates as substrates. Common component of RNA polymerases I and III which synthesize ribosomal RNA precursors and small RNAs, such as 5S rRNA and tRNAs, respectively			0.521887	0.199429	1.43836	0.700211	0.524426	1.53563	0.524426	1.53563	3	3	3	24.3853	24.1578	24.5455	25.5203	24.4639	24.6777						3	3	3	6.2	6.2	6.2	41.935	0	8.2457	163220000	6	2	2	3	2	2	2	2	2	3	2
tr|B2VLF8|B2VLF8_PODAN Podospora anserina S mat+ genomic DNA chromosome 5, supercontig 6 OS=Podospora anserina (strain S / ATCC MYA-4624 / DSM 980 / FGSC 10383) OX=515849 GN=PODANS_5_6000 PE=4 SV=1	B2VLF8	B2VLF8	PSMD13	Proteasome (prosome, macropain) 26S subunit, non-ATPase, 13			0.823379	0.48152	1.05471	0.317385	0.0768426	0.775159	0.0768426	0.775159	10	10	10	29.503	29.7332	29.7491	29.6695	29.8565	29.6899						10	10	10	33	33	33	44.032	0	38.735	5247700000	55	10	9	10	9	10	10	10	9	10	9
tr|B2AYP8|B2AYP8_PODAN Podospora anserina S mat+ genomic DNA chromosome 1, supercontig 2 OS=Podospora anserina (strain S / ATCC MYA-4624 / DSM 980 / FGSC 10383) OX=515849 GN=PODANS_1_11820 PE=4 SV=1	B2AYP8	B2AYP8		Domain of Complex I subunit NDUFS6		+	0.341723	0.0273558	1.93781	1.56295	0.954424	3.39688	0.954424	3.39688	5	5	5	27.9075	28.5996	28.5202	29.3048	28.9875	29.5984					KO_0h_WT_0h	5	5	5	55.4	55.4	55.4	11.862	0	24.377	3072900000	53	4	4	4	4	4	5	4	4	4	4
tr|B2VLI8|B2VLI8_PODAN Podospora anserina S mat+ genomic DNA chromosome 5, supercontig 6 OS=Podospora anserina (strain S / ATCC MYA-4624 / DSM 980 / FGSC 10383) OX=515849 GN=PODANS_5_6290 PE=4 SV=1	B2VLI8	B2VLI8	Psmd8	Proteasome (prosome, macropain) 26S subunit, non-ATPase, 8; Acts as a regulatory subunit of the 26S proteasome which is involved in the ATP-dependent degradation of ubiquitinated proteins.			0.81425	0.452657	1.0952	0.344231	0.131193	0.831083	0.131193	0.831083	4	4	4	28.653	28.6233	29.0582	28.8509	28.8238	29.0533						4	4	4	20.9	20.9	20.9	30.702	0	26.218	2910900000	25	4	4	4	4	4	4	4	4	4	4
tr|B2B848|B2B848_PODAN Proteasome subunit alpha type OS=Podospora anserina (strain S / ATCC MYA-4624 / DSM 980 / FGSC 10383) OX=515849 GN=PODANS_2_13300 PE=3 SV=1	B2B848	B2B848	Psma6	Proteasome (prosome, macropain) subunit, alpha type 6; The proteasome is a multicatalytic proteinase complex which is characterized by its ability to cleave peptides with Arg, Phe, Tyr, Leu, and Glu adjacent to the leaving group at neutral or slightly basic pH.			0.931671	0.716249	0.977235	0.144936	-0.0332222	-0.390241	-0.0332222	-0.390241	15	15	15	31.5248	31.4096	31.3662	31.364	31.537	31.3001						15	15	15	68.5	68.5	68.5	28.013	0	180.06	17276000000	103	13	15	13	14	14	14	13	15	13	14
tr|B2A930|B2A930_PODAN Podospora anserina S mat+ genomic DNA chromosome 1, supercontig 1 OS=Podospora anserina (strain S / ATCC MYA-4624 / DSM 980 / FGSC 10383) OX=515849 GN=PODANS_1_8240 PE=4 SV=1	B2A930	B2A930	PSMB7	Proteasome (prosome, macropain) subunit, beta type 7; The proteasome is a multicatalytic proteinase complex which is characterized by its ability to cleave peptides with Arg, Phe, Tyr, Leu, and Glu adjacent to the leaving group at neutral or slightly basic pH. The proteasome has an ATP-dependent proteolytic activity			0.76709	0.402992	1.1337	0.394704	0.181038	0.93441	0.181038	0.93441	2	2	2	26.5379	25.9471	26.4767	26.5936	26.4823	26.4288						2	2	2	19.3	19.3	19.3	29.476	0	7.9387	540870000	16	2	2	2	2	2	2	2	2	2	2
tr|B2B320|B2B320_PODAN Podospora anserina S mat+ genomic DNA chromosome 6, supercontig 2 OS=Podospora anserina (strain S / ATCC MYA-4624 / DSM 980 / FGSC 10383) OX=515849 GN=PODANS_6_1340 PE=3 SV=1	B2B320	B2B320					0.397831	0.0562356	1.97176	1.24999	0.979486	2.66264	0.979486	2.66264	4	4	4	25.757	26.3502	25.7202	27.5296	26.5549	26.6814						4	4	4	7.3	7.3	7.3	72.699	0	8.181	597500000	17	4	4	3	3	2	1	4	4	3	3
tr|A0A090CV76|A0A090CV76_PODAN Serine/threonine-protein phosphatase OS=Podospora anserina (strain S / ATCC MYA-4624 / DSM 980 / FGSC 10383) OX=515849 PE=3 SV=1	A0A090CV76	A0A090CV76	Ppp2ca	Protein phosphatase 2 (formerly 2A), catalytic subunit, alpha isoform; PP2A is the major phosphatase for microtubule-associated proteins (MAPs). PP2A can modulate the activity of phosphorylase B kinase casein kinase 2, mitogen-stimulated S6 kinase, and MAP-2 kinase.			0.627642	0.292632	1.12119	0.533679	0.165026	1.21076	0.165026	1.21076	4	4	4	28.5342	28.6472	28.9472	28.8997	28.7634	28.9604						4	4	4	20.2	20.2	20.2	37.226	0	63.196	2805500000	18	4	3	4	3	4	4	4	3	4	3
tr|A0A090CDR3|A0A090CDR3_PODAN Uncharacterized protein OS=Podospora anserina (strain S / ATCC MYA-4624 / DSM 980 / FGSC 10383) OX=515849 PE=4 SV=1	A0A090CDR3	A0A090CDR3		Oxoglutarate/iron-dependent dioxygenase; Prolyl 3-hydroxylase 2		+	0.246889	0.00626971	1.92346	2.20275	0.943705	5.25643	0.943705	5.25643	1	1	1	22.2807	21.8405	22.3463	22.9362	23.2137	23.1487					KO_0h_WT_0h	1	1	1	4.9	4.9	4.9	39.278	0.0057143	2.0509	41236000	1	1	1	1	1	1	1	1	1	1	1
tr|A0A090C8X5|A0A090C8X5_PODAN Putative 14-3-3 protein homolog OS=Podospora anserina (strain S / ATCC MYA-4624 / DSM 980 / FGSC 10383) OX=515849 PE=3 SV=1	A0A090C8X5	A0A090C8X5		Putative 14-3-3 protein homolog			0.541982	0.218374	0.949969	0.660799	-0.0740484	-1.45882	-0.0740484	-1.45882	15	14	14	33.483	33.5683	33.5821	33.396	33.534	33.4812						15	14	14	65.6	62.3	62.3	27.316	0	323.31	74008000000	150	15	15	15	14	15	13	14	14	14	13
tr|B2AQR4|B2AQR4_PODAN Podospora anserina S mat+ genomic DNA chromosome 4, supercontig 4 OS=Podospora anserina (strain S / ATCC MYA-4624 / DSM 980 / FGSC 10383) OX=515849 GN=PODANS_4_3430 PE=4 SV=1	B2AQR4	B2AQR4	-	putative homogentisate -dioxygenase protein			0.913155	0.644494	1.05112	0.190781	0.0719248	0.498195	0.0719248	0.498195	17	17	17	33.3947	33.7893	33.7179	33.608	33.8604	33.6494						17	17	17	56.1	56.1	56.1	18.77	0	269.37	82625000000	293	17	16	16	16	16	16	17	16	16	16
tr|B2A9D6|B2A9D6_PODAN Podospora anserina S mat+ genomic DNA chromosome 1, supercontig 1 OS=Podospora anserina (strain S / ATCC MYA-4624 / DSM 980 / FGSC 10383) OX=515849 GN=PODANS_1_675 PE=4 SV=1	B2A9D6	B2A9D6	Snrpg	Small nuclear ribonucleoprotein polypeptide G; Core component of the spliceosomal U1, U2, U4 and U5 small nuclear ribonucleoproteins (snRNPs), the building blocks of the spliceosome.		+	0.355086	0.0298458	1.90195	1.52512	0.92748	3.30313	0.92748	3.30313	4	4	4	26.2006	26.3001	26.9454	27.326	27.1908	27.7117					KO_0h_WT_0h	4	4	4	52.9	52.9	52.9	9.3688	0	9.141	963730000	17	4	4	4	4	4	4	4	4	4	4
tr|B2B826|B2B826_PODAN Acidic cytosolic 60S ribosomal protein RplP1 OS=Podospora anserina (strain S / ATCC MYA-4624 / DSM 980 / FGSC 10383) OX=515849 GN=PODANS_2_13080 PE=3 SV=1	B2B826	B2B826	Rplp1	Ribosomal protein, large, P1; Plays an important role in the elongation step of protein synthesis		+	0.333263	0.0160167	1.8897	1.79543	0.918161	4.00849	0.918161	4.00849	3	3	3	26.5671	26.3538	26.6409	27.1901	27.8611	27.2651					KO_0h_WT_0h	3	3	3	70.9	70.9	70.9	10.942	0	10.272	848030000	11	2	2	2	2	3	2	2	2	2	2
tr|B2AM18|B2AM18_PODAN Podospora anserina S mat+ genomic DNA chromosome 1, supercontig 3 OS=Podospora anserina (strain S / ATCC MYA-4624 / DSM 980 / FGSC 10383) OX=515849 GN=PODANS_1_13950 PE=4 SV=1	B2AM18	B2AM18		Magnesium transporter domain		+	0.405176	0.0480978	1.88969	1.31787	0.918147	2.81447	0.918147	2.81447	2	2	2	23.1777	23.1912	24.0138	24.0339	24.5767	24.5265					KO_0h_WT_0h	2	2	2	13	13	13	24.474	0	10.555	102370000	10	2	2	2	2	2	2	2	2	2	2
tr|B2AVL5|B2AVL5_PODAN 54S ribosomal protein L31, mitochondrial OS=Podospora anserina (strain S / ATCC MYA-4624 / DSM 980 / FGSC 10383) OX=515849 GN=PODANS_7_2530 PE=4 SV=1	B2AVL5	B2AVL5		Mitoribosomal protein L31		+	0.206182	0.00314612	1.8742	2.50222	0.906275	6.35271	0.906275	6.35271	2	2	2	24.757	24.8701	25.0962	25.9629	25.6187	25.8606					KO_0h_WT_0h	2	2	2	20.9	20.9	20.9	12.907	0	5.1112	272750000	10	1	1	1	1	1	2	1	1	1	1
tr|A0A090CX80|A0A090CX80_PODAN Coronin OS=Podospora anserina (strain S / ATCC MYA-4624 / DSM 980 / FGSC 10383) OX=515849 PE=3 SV=1	A0A090CX80	A0A090CX80					0.390534	0.0728582	1.89568	1.13752	0.922714	2.41879	0.922714	2.41879	6	6	6	27.1887	28.0858	28.4279	28.7046	28.7551	29.0109						6	6	6	6.9	6.9	6.9	68.003	0	67.95	2230400000	50	5	6	5	6	6	6	5	6	5	6
tr|B2ATD4|B2ATD4_PODAN Podospora anserina S mat+ genomic DNA chromosome 1, supercontig 4 OS=Podospora anserina (strain S / ATCC MYA-4624 / DSM 980 / FGSC 10383) OX=515849 GN=PODANS_1_15480 PE=4 SV=1	B2ATD4	B2ATD4					0.424935	0.0973786	1.89432	1.01154	0.921681	2.1555	0.921681	2.1555	2	2	2	25.6771	26.276	26.8722	26.6986	27.5186	27.3732						2	2	2	14.8	14.8	14.8	12.522	0	37.512	732760000	36	2	2	2	2	2	2	2	2	2	2
tr|B2AAD2|B2AAD2_PODAN Podospora anserina S mat+ genomic DNA chromosome 1, supercontig 1 OS=Podospora anserina (strain S / ATCC MYA-4624 / DSM 980 / FGSC 10383) OX=515849 GN=PODANS_1_3630 PE=4 SV=1	B2AAD2	B2AAD2		Domain of Cytochrome c oxidase assembly factor 3, mitochondrial		+	0.2904	0.0134842	1.86747	1.87017	0.901085	4.21939	0.901085	4.21939	2	2	2	25.2638	25.8343	25.8935	26.6923	26.44	26.5626					KO_0h_WT_0h	2	2	2	26	26	26	8.0993	0	6.0529	461050000	7	1	1	1	2	1	1	1	1	1	2
tr|B2ATG7|B2ATG7_PODAN Podospora anserina S mat+ genomic DNA chromosome 1, supercontig 4 OS=Podospora anserina (strain S / ATCC MYA-4624 / DSM 980 / FGSC 10383) OX=515849 GN=PODANS_1_15800 PE=4 SV=1	B2ATG7	B2ATG7	PDHB	pyruvate dehydrogenase complex subunit beta			0.893002	0.604225	1.05002	0.218802	0.0704136	0.561823	0.0704136	0.561823	8	8	8	31.3373	31.3084	31.591	31.3387	31.6407	31.4686						8	8	8	28.6	28.6	28.6	40.917	0	104.29	17643000000	49	7	5	7	7	7	7	7	5	7	7
tr|A0A090CVA7|A0A090CVA7_PODAN Putative GTP-binding protein OS=Podospora anserina (strain S / ATCC MYA-4624 / DSM 980 / FGSC 10383) OX=515849 PE=4 SV=1	A0A090CVA7	A0A090CVA7	Rab1	RAB1, member RAS oncogene family; The small GTPases Rab are key regulators of intracellular membrane trafficking, from the formation of transport vesicles to their fusion with membranes.			0.557101	0.238015	0.907528	0.623396	-0.139985	-1.38597	-0.139985	-1.38597	6	5	5	27.4509	27.3615	27.4084	27.26	27.4394	27.1014						6	5	5	36.7	31.4	31.4	22.798	0	66.897	1020800000	10	4	3	4	4	4	3	3	2	3	3
tr|B2ASQ1|B2ASQ1_PODAN Podospora anserina S mat+ genomic DNA chromosome 1, supercontig 6 OS=Podospora anserina (strain S / ATCC MYA-4624 / DSM 980 / FGSC 10383) OX=515849 GN=PODANS_1_24260 PE=4 SV=1	B2ASQ1	B2ASQ1	RAB6A	RAB6A, member RAS oncogene family; Protein transport. Regulator of membrane traffic from the Golgi apparatus towards the endoplasmic reticulum (ER)			0.965554	0.900176	1.01674	0.0456724	0.0239557	0.133592	0.0239557	0.133592	1	1	1	28.9702	28.7533	29.351	29.0505	28.9777	29.1182						1	1	1	5.2	5.2	5.2	23.485	0	27.905	3330400000	16	1	1	1	1	1	1	1	1	1	1
tr|B2ASL1|B2ASL1_PODAN Podospora anserina S mat+ genomic DNA chromosome 1, supercontig 6 OS=Podospora anserina (strain S / ATCC MYA-4624 / DSM 980 / FGSC 10383) OX=515849 GN=PODANS_1_23850 PE=4 SV=1	B2ASL1	B2ASL1	Rras2	Related RAS viral (r-ras) oncogene homolog 2; It is a plasma membrane-associated GTP-binding protein with GTPase activity.			0.505816	0.190331	1.12663	0.720491	0.172013	1.5752	0.172013	1.5752	6	6	6	29.919	30.0449	30.0797	30.005	30.2147	30.3399						6	6	6	34.6	34.6	34.6	23.985	0	99.258	6967900000	46	5	6	5	6	6	6	5	6	5	6
tr|B2AQK9|B2AQK9_PODAN Podospora anserina S mat+ genomic DNA chromosome 4, supercontig 4 OS=Podospora anserina (strain S / ATCC MYA-4624 / DSM 980 / FGSC 10383) OX=515849 GN=PODANS_4_3850 PE=4 SV=1	B2AQK9	B2AQK9		SAM-dependent MethylTransferase, Winged helix transcription factor like Arginine repressor		+	0.327077	0.0160721	1.86548	1.79393	0.899549	4.00433	0.899549	4.00433	7	7	7	28.145	27.9418	27.6021	28.565	28.7211	29.1015					KO_0h_WT_0h	7	7	7	20.4	20.4	20.4	47.761	0	35.665	2174000000	25	7	5	7	6	6	7	7	5	7	6
tr|B2ABH4|B2ABH4_PODAN Podospora anserina S mat+ genomic DNA chromosome 1, supercontig 5 OS=Podospora anserina (strain S / ATCC MYA-4624 / DSM 980 / FGSC 10383) OX=515849 GN=PODANS_1_20680 PE=4 SV=1	B2ABH4	B2ABH4	Rpl21	Ribosomal protein L21			0.477266	0.144066	1.33433	0.84144	0.41612	1.81287	0.41612	1.81287	5	5	5	30.8083	31.3042	31.1562	31.8583	31.33	31.3287						5	5	5	31.2	31.2	31.2	18.252	0	14.198	16214000000	45	5	5	5	5	5	5	5	5	5	5
tr|B2B4T2|B2B4T2_PODAN 60S ribosomal protein L36 OS=Podospora anserina (strain S / ATCC MYA-4624 / DSM 980 / FGSC 10383) OX=515849 GN=PODANS_2_2360 PE=3 SV=1	B2B4T2	B2B4T2	Rpl36	Ribosomal protein L36			0.958427	0.855844	1.08675	0.0676054	0.120021	0.193707	0.120021	0.193707	4	3	3	28.9017	29.911	30.2537	30.7275	29.5065	29.1924						4	3	3	30.8	21.5	21.5	11.916	0	10.335	5945300000	34	4	4	4	4	4	4	3	3	3	3
tr|B2B0Y4|B2B0Y4_PODAN Podospora anserina S mat+ genomic DNA chromosome 3, supercontig 2 OS=Podospora anserina (strain S / ATCC MYA-4624 / DSM 980 / FGSC 10383) OX=515849 GN=PODANS_3_7730 PE=4 SV=1	B2B0Y4	B2B0Y4		domain from G-protein beta WD-40 repeat, contained in E3 ubiquitin ligase etc			0.413654	0.0928281	1.88836	1.03232	0.917131	2.1983	0.917131	2.1983	1	1	1	23.4564	23.2256	23.4866	23.5277	24.4802	24.9121						1	1	1	2.8	2.8	2.8	43.691	0	12.906	100140000	3	1	1	1	1	1	1	1	1	1	1
tr|B2B1N9|B2B1N9_PODAN Podospora anserina S mat+ genomic DNA chromosome 6, supercontig 2 OS=Podospora anserina (strain S / ATCC MYA-4624 / DSM 980 / FGSC 10383) OX=515849 GN=PODANS_6_3950 PE=4 SV=1	B2B1N9	B2B1N9	Tuba1c	Tubulin, alpha 1C; Tubulin is the major constituent of microtubules. It binds two moles of GTP, one at an exchangeable site on the beta chain and one at a non-exchangeable site on the alpha chain			0.402456	0.0544224	1.87861	1.26422	0.909663	2.69417	0.909663	2.69417	4	4	4	26.2962	26.9764	27.4415	27.699	27.8576	27.8865						4	4	4	9	9	9	61.453	0	14.685	1105900000	9	4	4	4	4	3	3	4	4	4	4
tr|B2ABP6|B2ABP6_PODAN Podospora anserina S mat+ genomic DNA chromosome 1, supercontig 5 OS=Podospora anserina (strain S / ATCC MYA-4624 / DSM 980 / FGSC 10383) OX=515849 GN=PODANS_1_20540 PE=3 SV=1	B2ABP6	B2ABP6	Vars2	Valyl-tRNA synthetase 2, mitochondrial		+	0.349586	0.0251992	1.84937	1.59861	0.88703	3.48666	0.88703	3.48666	1	1	1	21.7895	21.9421	22.1595	22.8835	22.4359	23.2328					KO_0h_WT_0h	1	1	1	0.9	0.9	0.9	118.42	0	2.6678	35608000	3	1	1	1	1	1	1	1	1	1	1
tr|B2VL96|B2VL96_PODAN Podospora anserina S mat+ genomic DNA chromosome 5, supercontig 6 OS=Podospora anserina (strain S / ATCC MYA-4624 / DSM 980 / FGSC 10383) OX=515849 GN=PODANS_5_5380 PE=3 SV=1	B2VL96	B2VL96		Complex 1 LYR protein		+	0.2656	0.00936051	1.83891	2.0287	0.878855	4.69248	0.878855	4.69248	4	4	4	26.3257	26.745	26.7619	27.7081	27.472	27.2889					KO_0h_WT_0h	4	4	4	39.4	39.4	39.4	11.565	0	15.944	910840000	21	3	3	4	4	4	4	3	3	4	4
tr|B2ADV7|B2ADV7_PODAN Podospora anserina S mat+ genomic DNA chromosome 4, supercontig 1 OS=Podospora anserina (strain S / ATCC MYA-4624 / DSM 980 / FGSC 10383) OX=515849 GN=PODANS_4_2215 PE=4 SV=1	B2ADV7	B2ADV7		?		+	0.216	0.00287944	1.8049	2.54069	0.851922	6.50642	0.851922	6.50642	3	3	3	27.4425	27.4853	27.6196	28.1409	28.4154	28.5468					KO_0h_WT_0h	3	3	3	23.1	23.1	23.1	12.532	0	17.546	1622600000	33	3	3	3	3	3	3	3	3	3	3
tr|B2B7L7|B2B7L7_PODAN Podospora anserina S mat+ genomic DNA chromosome 2, supercontig 2 OS=Podospora anserina (strain S / ATCC MYA-4624 / DSM 980 / FGSC 10383) OX=515849 GN=PODANS_2_11540 PE=4 SV=1	B2B7L7	B2B7L7		Cytochrome c oxidase polypeptide VI, mitochondrial		+	0.348364	0.0279979	1.72513	1.55287	0.786706	3.37177	0.786706	3.37177	8	8	8	30.3949	30.7904	31.0256	31.792	31.4775	31.3016					KO_0h_WT_0h	8	8	8	54.2	54.2	54.2	17.475	0	172.63	14811000000	127	7	7	8	7	7	7	7	7	8	7
tr|B2B7P7|B2B7P7_PODAN Podospora anserina S mat+ genomic DNA chromosome 2, supercontig 2 OS=Podospora anserina (strain S / ATCC MYA-4624 / DSM 980 / FGSC 10383) OX=515849 GN=PODANS_2_11810 PE=3 SV=1	B2B7P7	B2B7P7	SEPT7	Septin 7; Filament-forming cytoskeletal GTPase. Required for normal organization of the actin cytoskeleton. Required for normal progress through mitosis. Involved in cytokinesis			0.511741	0.19306	1.13972	0.714308	0.188682	1.56313	0.188682	1.56313	10	10	9	31.238	31.2726	31.4724	31.3327	31.6571	31.5594						10	10	9	29.4	29.4	27	44.605	0	306.39	17362000000	108	10	10	10	9	9	8	10	10	10	9
tr|A0A090CBJ5|A0A090CBJ5_PODAN Putative serine racemase OS=Podospora anserina (strain S / ATCC MYA-4624 / DSM 980 / FGSC 10383) OX=515849 PE=4 SV=1	A0A090CBJ5	A0A090CBJ5	Srr	Serine racemase; Catalyzes the synthesis of D-serine from L-serine. D- serine is a key coagonist with glutamate at NMDA receptors.			0.542457	0.218259	1.3243	0.661028	0.405235	1.45927	0.405235	1.45927	5	5	5	29.216	28.732	29.3981	29.1966	29.8672	29.4979						5	5	5	20.9	20.9	20.9	38.311	0	123.09	4129700000	20	4	4	4	4	4	4	4	4	4	4
tr|B2B4B1|B2B4B1_PODAN Podospora anserina S mat+ genomic DNA chromosome 2, supercontig 2 OS=Podospora anserina (strain S / ATCC MYA-4624 / DSM 980 / FGSC 10383) OX=515849 GN=PODANS_2_670 PE=4 SV=1	B2B4B1	B2B4B1					0.380901	0.0636592	1.84572	1.19614	0.884182	2.54475	0.884182	2.54475	2	2	2	27.2089	27.5641	28.3787	28.5756	28.6589	28.5698						2	2	2	16.2	16.2	16.2	14.693	0	41.271	1926500000	26	2	2	2	2	2	2	2	2	2	2
tr|B2AA22|B2AA22_PODAN Podospora anserina S mat+ genomic DNA chromosome 1, supercontig 1 OS=Podospora anserina (strain S / ATCC MYA-4624 / DSM 980 / FGSC 10383) OX=515849 GN=PODANS_1_2560 PE=3 SV=1	B2AA22	B2AA22		DNA-directed RNA polymerases I/II/III subunit		+	0.351316	0.0316506	1.71098	1.49962	0.774825	3.24078	0.774825	3.24078	4	4	4	27.0696	27.6296	27.8016	28.418	28.1052	28.302					KO_0h_WT_0h	4	4	4	37.8	37.8	37.8	9.331	0	81.066	1560800000	33	3	4	3	3	3	3	3	4	3	3
tr|B2B1D5|B2B1D5_PODAN Podospora anserina S mat+ genomic DNA chromosome 3, supercontig 2 OS=Podospora anserina (strain S / ATCC MYA-4624 / DSM 980 / FGSC 10383) OX=515849 GN=PODANS_3_9030 PE=4 SV=1	B2B1D5	B2B1D5					0.384431	0.0593762	1.83279	1.22639	0.874039	2.6107	0.874039	2.6107	1	1	1	23.7986	23.7337	24.1203	25.3744	24.3572	24.5431						1	1	1	5.2	5.2	5.2	41.68	0	35.336	136210000	1	1	1	1	1	1	1	1	1	1	1
tr|B2ATY8|B2ATY8_PODAN Superoxide dismutase [Cu-Zn] OS=Podospora anserina (strain S / ATCC MYA-4624 / DSM 980 / FGSC 10383) OX=515849 GN=PODANS_1_17400 PE=3 SV=1	B2ATY8	B2ATY8	Sod1	Superoxide dismutase 1, soluble; Destroys radicals which are normally produced within the cells and which are toxic to biological systems			0.925505	0.693587	1.04533	0.158899	0.0639572	0.423683	0.0639572	0.423683	8	8	8	33.603	33.3965	33.6183	33.3439	33.6822	33.7836						8	8	8	67.5	67.5	67.5	15.951	0	323.31	77011000000	134	8	7	6	7	8	7	8	7	6	7
tr|B2ABJ7|B2ABJ7_PODAN Podospora anserina S mat+ genomic DNA chromosome 1, supercontig 5 OS=Podospora anserina (strain S / ATCC MYA-4624 / DSM 980 / FGSC 10383) OX=515849 GN=PODANS_1_21090 PE=4 SV=1	B2ABJ7	B2ABJ7	Stx5a	Syntaxin 5A; Mediates endoplasmic reticulum to Golgi transport.			0.903742	0.617993	1.15448	0.209017	0.207246	0.539784	0.207246	0.539784	2	2	2	27.5014	27.3016	27.2771	28.0107	26.8168	27.8743						2	2	2	8.9	8.9	8.9	35.068	0	3.815	1152800000	9	2	2	2	2	2	2	2	2	2	2
tr|B2B3E1|B2B3E1_PODAN Podospora anserina S mat+ genomic DNA chromosome 6, supercontig 2 OS=Podospora anserina (strain S / ATCC MYA-4624 / DSM 980 / FGSC 10383) OX=515849 GN=PODANS_6_300 PE=3 SV=1	B2B3E1	B2B3E1	Thop1	Thimet oligopeptidase 1; Involved in the metabolism of neuropeptides under 20 amino acid residues long. Involved in cytoplasmic peptide degradation. Able to degrade the beta-amyloid precursor protein and generate amyloidogenic fragments			0.50737	0.173321	0.547645	0.761148	-0.868688	-1.65473	-0.868688	-1.65473	4	4	4	25.294	25.308	24.2262	24.4947	24.4195	23.3079						4	4	4	7.5	7.5	7.5	81.943	0	16.651	158770000	6	3	3	3	3	2	3	3	3	3	3
tr|B2APH5|B2APH5_PODAN Podospora anserina S mat+ genomic DNA chromosome 5, supercontig 10 OS=Podospora anserina (strain S / ATCC MYA-4624 / DSM 980 / FGSC 10383) OX=515849 GN=PODANS_5_10350 PE=4 SV=1	B2APH5	B2APH5	TXN1	Thioredoxin 1; Participates in various redox reactions through the reversible oxidation of its active center dithiol to a disulfide and catalyzes dithiol-disulfide exchange reactions			0.759257	0.396783	1.18277	0.401447	0.242172	0.948059	0.242172	0.948059	3	3	3	24.5146	25.2617	25.2191	25.0863	25.2749	25.3607						3	3	3	21.8	21.8	21.8	17.78	0	6.8024	222560000	2	3	2	2	2	2	2	3	2	2	2
tr|A0A090CN17|A0A090CN17_PODAN Putative NADH:ubiquinone oxidoreductase 20.1kD subunit OS=Podospora anserina (strain S / ATCC MYA-4624 / DSM 980 / FGSC 10383) OX=515849 PE=4 SV=1	A0A090CN17	A0A090CN17					0.392032	0.0581158	1.81165	1.23571	0.857307	2.63116	0.857307	2.63116	5	5	5	28.028	28.7051	28.9264	29.6521	29.0539	29.5254						5	5	5	21.6	21.6	21.6	22.578	0	14.3	3395200000	34	4	5	5	5	5	5	4	5	5	5
tr|B2ARC6|B2ARC6_PODAN NADH dehydrogenase [ubiquinone] flavoprotein 1, mitochondrial OS=Podospora anserina (strain S / ATCC MYA-4624 / DSM 980 / FGSC 10383) OX=515849 GN=PODANS_4_7950 PE=3 SV=1	B2ARC6	B2ARC6	NDUFV1	iron-sulfur-containing NADH dehydrogenase [ubiquinone] flavoprotein 1, mitochondrial		+	0.358909	0.0377915	1.69772	1.42261	0.763603	3.05639	0.763603	3.05639	8	8	8	28.2956	27.8229	28.4987	29.006	28.694	29.208					KO_0h_WT_0h	8	8	8	28.2	28.2	28.2	54.339	0	43.815	2539700000	24	6	7	4	7	7	7	6	7	4	7
tr|B2AP91|B2AP91_PODAN Podospora anserina S mat+ genomic DNA chromosome 7, supercontig 3 OS=Podospora anserina (strain S / ATCC MYA-4624 / DSM 980 / FGSC 10383) OX=515849 GN=PODANS_7_390 PE=4 SV=1	B2AP91	B2AP91					0.408891	0.0901789	1.75912	1.0449	0.814856	2.22431	0.814856	2.22431	3	3	3	25.8562	26.3708	26.5963	27.6761	26.7759	26.8158						3	3	3	25.4	25.4	25.4	13.36	0	17.828	697070000	23	3	3	3	3	3	3	3	3	3	3
tr|B2AXK5|B2AXK5_PODAN Podospora anserina S mat+ genomic DNA chromosome 7, supercontig 1 OS=Podospora anserina (strain S / ATCC MYA-4624 / DSM 980 / FGSC 10383) OX=515849 GN=PODANS_7_10880 PE=3 SV=1	B2AXK5	B2AXK5	OAT or ABAT	ornithine aminotransferase			0.386574	0.0591943	1.74568	1.22772	0.803793	2.61362	0.803793	2.61362	13	13	13	29.9359	29.6433	30.4018	31.1928	30.4578	30.7418						13	13	13	36.8	36.8	36.8	50.354	0	100.48	9009200000	60	11	11	12	13	11	9	11	11	12	13
tr|B2AW44|B2AW44_PODAN Podospora anserina S mat+ genomic DNA chromosome 7, supercontig 1 OS=Podospora anserina (strain S / ATCC MYA-4624 / DSM 980 / FGSC 10383) OX=515849 GN=PODANS_7_5900 PE=4 SV=1	B2AW44	B2AW44		transmembrane helix			0.505222	0.173603	2.17105	0.760442	1.11839	1.65335	1.11839	1.65335	1	1	1	26.1217	26.2155	27.6378	26.9174	27.8945	28.5182						1	1	1	5.4	5.4	5.4	18.762	0	4.2876	1120500000	5	1	1	1	1	1	1	1	1	1	1
tr|B2AYJ3|B2AYJ3_PODAN Alanine--tRNA ligase OS=Podospora anserina (strain S / ATCC MYA-4624 / DSM 980 / FGSC 10383) OX=515849 GN=ALA1 PE=3 SV=1	B2AYJ3	B2AYJ3		Alanine--tRNA ligase		+	0.338062	0.0268088	1.6947	1.57172	0.761031	3.41884	0.761031	3.41884	3	3	3	26.6946	26.9411	26.9062	28.0137	27.3183	27.493					KO_0h_WT_0h	3	3	3	5.6	5.6	5.6	101.17	0	23.746	990480000	11	3	1	2	2	2	1	3	1	2	2
tr|A0A090CWU2|A0A090CWU2_PODAN Triosephosphate isomerase OS=Podospora anserina (strain S / ATCC MYA-4624 / DSM 980 / FGSC 10383) OX=515849 PE=3 SV=1	A0A090CWU2	A0A090CWU2	TPI1	Triosephosphate isomerase 1			0.925764	0.686946	0.974027	0.163077	-0.0379664	-0.433589	-0.0379664	-0.433589	13	13	13	33.985	34.0467	34.0755	33.9028	34.164	33.9265						13	13	13	55.4	55.4	55.4	26.445	0	323.31	104490000000	170	12	12	11	12	10	12	12	12	11	12
tr|B2B5X6|B2B5X6_PODAN Podospora anserina S mat+ genomic DNA chromosome 2, supercontig 2 OS=Podospora anserina (strain S / ATCC MYA-4624 / DSM 980 / FGSC 10383) OX=515849 GN=PODANS_2_6080 PE=4 SV=1	B2B5X6	B2B5X6	Trmt112	tRNA methyltransferase 11-2 homolog (S. cerevisiae); Participates both in methylation of protein and tRNA species.			0.425405	0.120366	2.25303	0.919497	1.17187	1.96857	1.17187	1.96857	2	2	2	23.2644	24.8455	24.2819	25.0055	24.8553	26.0466						2	2	2	18.4	18.4	18.4	15.059	0	4.7529	193970000	10	2	2	2	2	2	2	2	2	2	2
tr|B2B244|B2B244_PODAN Cytochrome c oxidase polypeptide 5 encoded by the cox5 protein OS=Podospora anserina (strain S / ATCC MYA-4624 / DSM 980 / FGSC 10383) OX=515849 GN=PODANS_6_5480 PE=4 SV=1	B2B244	B2B244					0.399518	0.0884038	1.72176	1.05353	0.78388	2.24222	0.78388	2.24222	5	5	5	29.4248	30.2926	30.3774	31.1273	30.7852	30.534						5	5	5	37.5	37.5	37.5	18.242	0	50.614	9181300000	77	5	5	5	5	5	5	5	5	5	5
tr|B2B473|B2B473_PODAN Podospora anserina S mat+ genomic DNA chromosome 2, supercontig 2 OS=Podospora anserina (strain S / ATCC MYA-4624 / DSM 980 / FGSC 10383) OX=515849 GN=PODANS_2_280 PE=3 SV=1	B2B473	B2B473	Ppm1a	Protein phosphatase 1A, magnesium dependent, alpha isoform; Enzyme with a broad specificity.			0.39152	0.0690755	1.71127	1.16068	0.77507	2.46826	0.77507	2.46826	5	5	5	28.5167	29.4313	29.3273	29.7421	30.112	29.7463						5	5	5	14.4	14.4	14.4	47.052	0	17.349	4740500000	48	4	5	4	5	5	5	4	5	4	5
tr|B2B093|B2B093_PODAN Podospora anserina S mat+ genomic DNA chromosome 3, supercontig 2 OS=Podospora anserina (strain S / ATCC MYA-4624 / DSM 980 / FGSC 10383) OX=515849 GN=PODANS_3_8360 PE=4 SV=1	B2B093	B2B093	PRPS2	Phosphoribosyl pyrophosphate synthetase 2; Catalyzes the synthesis of phosphoribosylpyrophosphate (PRPP) that is essential for nucleotide synthesis		+	0.250133	0.00506461	1.68956	2.29545	0.756644	5.57775	0.756644	5.57775	1	1	1	24.5358	24.95	24.8383	25.4383	25.6307	25.525					KO_0h_WT_0h	1	1	1	3.4	3.4	3.4	47.115	0	7.2648	232430000	12	1	1	1	1	1	1	1	1	1	1
tr|B2AZ65|B2AZ65_PODAN Orotate phosphoribosyltransferase encoded by the ura5 protein OS=Podospora anserina (strain S / ATCC MYA-4624 / DSM 980 / FGSC 10383) OX=515849 GN=PODANS_3_4280 PE=3 SV=1	B2AZ65	B2AZ65	Umps	Uridine monophosphate synthetase			0.533836	0.209705	1.15982	0.678392	0.213905	1.49309	0.213905	1.49309	4	4	4	29.1869	29.3065	29.5365	29.7564	29.4426	29.4725						4	4	4	21	21	21	25.014	0	24.896	4435300000	24	3	4	3	4	4	4	3	4	3	4
tr|A0A090CMV1|A0A090CMV1_PODAN Uncharacterized protein OS=Podospora anserina (strain S / ATCC MYA-4624 / DSM 980 / FGSC 10383) OX=515849 PE=4 SV=1	A0A090CMV1	A0A090CMV1	blast: Triap1 or CCZ1	TP53-regulated inhibitor of apoptosis 1 (modulating mitochondrial cardiolipin) or Vacuolar fusion protein CCZ1 homolog		+	0.330455	0.0186404	1.67828	1.72955	0.746981	3.8286	0.746981	3.8286	2	2	2	23.7266	24.0511	24.3705	24.6778	24.8511	24.8602					KO_0h_WT_0h	2	2	2	20.9	20.9	20.9	15.609	0	8.6533	140510000	7	2	2	2	2	2	1	2	2	2	2
tr|B2AWB6|B2AWB6_PODAN Podospora anserina S mat+ genomic DNA chromosome 7, supercontig 1 OS=Podospora anserina (strain S / ATCC MYA-4624 / DSM 980 / FGSC 10383) OX=515849 GN=PODANS_7_6610 PE=4 SV=1	B2AWB6	B2AWB6	Yeats2	YEATS domain containing 2; Component of the ATAC complex, a complex with histone acetyltransferase activity on histones H3 and H4			0.957842	0.829196	1.04708	0.081343	0.0663783	0.230247	0.0663783	0.230247	3	3	3	25.4332	25.1824	25.8718	25.2379	25.5036	25.945						3	3	3	10.3	10.3	10.3	32.889	0	6.2831	296530000	4	1	1	3	2	1	2	1	1	3	2
tr|B2B852|B2B852_PODAN Mitogen-activated protein kinase OS=Podospora anserina (strain S / ATCC MYA-4624 / DSM 980 / FGSC 10383) OX=515849 GN=PODANS_2_13340 PE=3 SV=1	B2B852	B2B852		Mitogen-activated protein kinase		+	0.355955	0.037942	1.66448	1.42088	0.735072	3.05232	0.735072	3.05232	6	6	6	28.4372	28.1591	28.1921	28.5566	29.149	29.2881					KO_0h_WT_0h	6	6	6	19.6	19.6	19.6	46.597	0	38.02	2615500000	33	5	5	6	4	5	5	5	5	6	4
tr|B2AP29|B2AP29_PODAN Podospora anserina S mat+ genomic DNA chromosome 7, supercontig 3 OS=Podospora anserina (strain S / ATCC MYA-4624 / DSM 980 / FGSC 10383) OX=515849 GN=PODANS_7_1500 PE=4 SV=1	B2AP29	B2AP29	#N/A	#N/A			0.412565	0.10953	0.0197123	0.960466	-5.66476	-2.05129	-5.66476	-2.05129	1	1	1	23.8226	24.407	24.132	15.6994	23.9686	15.6994						1	1	1	6.6	6.6	6.6	28.1	0.0089965	1.6937	71883000	1	1	1	1	0	1	0	1	1	1	0
tr|B2A9E5|B2A9E5_PODAN Podospora anserina S mat+ genomic DNA chromosome 1, supercontig 1 OS=Podospora anserina (strain S / ATCC MYA-4624 / DSM 980 / FGSC 10383) OX=515849 GN=PODANS_1_600 PE=4 SV=1	B2A9E5	B2A9E5	#N/A	#N/A			0.545974	0.220535	0.878406	0.656523	-0.18704	-1.45049	-0.18704	-1.45049	1	1	1	25.4783	25.4405	25.159	25.3286	25.1277	25.0605						1	1	1	3	3	3	40.74	0.0096752	1.6855	243530000	1	1	1	1	1	1	1	1	1	1	1
tr|B2ASH5|B2ASH5_PODAN Podospora anserina S mat+ genomic DNA chromosome 1, supercontig 6 OS=Podospora anserina (strain S / ATCC MYA-4624 / DSM 980 / FGSC 10383) OX=515849 GN=PODANS_1_23510 PE=4 SV=1	B2ASH5	B2ASH5	#N/A	#N/A			0.798254	0.424238	0.107716	0.37239	-3.21469	-0.888994	-3.21469	-0.888994	1	1	1	27.2954	25.4697	25.1157	27.0584	25.479	15.6994						1	1	1	3.2	3.2	3.2	38.674	0.0063425	1.9201	434070000	1	1	1	1	1	1	0	1	1	1	1
tr|B2B0U1|B2B0U1_PODAN Podospora anserina S mat+ genomic DNA chromosome 3, supercontig 2 OS=Podospora anserina (strain S / ATCC MYA-4624 / DSM 980 / FGSC 10383) OX=515849 GN=PODANS_3_7300 PE=4 SV=1	B2B0U1	B2B0U1	#N/A	#N/A			0.800972	0.427257	0.105473	0.369311	-3.24505	-0.882695	-3.24505	-0.882695	1	1	1	26.8132	25.3875	26.5277	26.4831	15.6994	26.8108						1	1	1	1.3	1.3	1.3	69.894	0.0069832	1.7919	470080000	7	1	1	1	1	1	1	1	1	1	1
tr|B2B292|B2B292_PODAN Podospora anserina S mat+ genomic DNA chromosome 6, supercontig 2 OS=Podospora anserina (strain S / ATCC MYA-4624 / DSM 980 / FGSC 10383) OX=515849 GN=PODANS_6_5940 PE=4 SV=1	B2B292	B2B292	#N/A	#N/A			0.807931	0.437316	0.177147	0.359205	-2.49698	-0.861966	-2.49698	-0.861966	1	1	1	23.8878	23.9842	24.0931	15.6994	24.4529	24.3219						1	1	1	3	3	3	54.643	0.0076709	1.7599	93947000	1	1	1	1	0	1	1	1	1	1	0
tr|B2ALQ8|B2ALQ8_PODAN V-type proton ATPase subunit H OS=Podospora anserina (strain S / ATCC MYA-4624 / DSM 980 / FGSC 10383) OX=515849 GN=PODANS_1_13520 PE=3 SV=1	B2ALQ8	B2ALQ8	#N/A	#N/A			0.809386	0.440483	0.117345	0.356071	-3.09117	-0.855519	-3.09117	-0.855519	1	1	1	25.9061	26.0649	26.0772	15.6994	26.5613	26.514						1	1	1	2.3	2.3	2.3	53.14	0.0063336	1.914	398740000	2	1	1	1	0	1	1	1	1	1	0
tr|B2AZI0|B2AZI0_PODAN Podospora anserina S mat+ genomic DNA chromosome 3, supercontig 2 OS=Podospora anserina (strain S / ATCC MYA-4624 / DSM 980 / FGSC 10383) OX=515849 GN=PODANS_3_4510 PE=4 SV=1	B2AZI0	B2AZI0	#N/A	#N/A			0.821375	0.468475	0.896067	0.329314	-0.158321	-0.800101	-0.158321	-0.800101	1	1	1	24.9077	24.7111	25.0799	24.9874	24.813	24.4234						1	1	1	3.3	3.3	3.3	33.881	0.0043321	2.2167	179640000	6	1	1	1	1	1	1	1	1	1	1
tr|B2AYT4|B2AYT4_PODAN Podospora anserina S mat+ genomic DNA chromosome 1, supercontig 2 OS=Podospora anserina (strain S / ATCC MYA-4624 / DSM 980 / FGSC 10383) OX=515849 GN=PODANS_1_12160 PE=4 SV=1	B2AYT4	B2AYT4	#N/A	#N/A			0.819478	0.469335	0.771483	0.328517	-0.374294	-0.79844	-0.374294	-0.79844	1	1	1	23.7869	24.9489	24.0032	23.2653	24.2112	24.1395						1	1	1	2.1	2.1	2.1	48.915	0.0083391	1.7246	111660000	1	1	1	1	1	1	1	1	1	1	1
tr|A0A090CI72|A0A090CI72_PODAN Kinesin-like protein OS=Podospora anserina (strain S / ATCC MYA-4624 / DSM 980 / FGSC 10383) OX=515849 PE=3 SV=1	A0A090CI72	A0A090CI72	#N/A	#N/A			0.821868	0.476116	0.248844	0.322287	-2.00669	-0.785427	-2.00669	-0.785427	2	2	2	22.7627	22.7485	22.9002	15.6994	23.6385	23.0534						2	2	2	3.3	3.3	3.3	70.083	0.0043073	2.1493	43754000	2	1	1	1	0	2	1	1	1	1	0
tr|B2A9Q7|B2A9Q7_PODAN Podospora anserina S mat+ genomic DNA chromosome 1, supercontig 1 OS=Podospora anserina (strain S / ATCC MYA-4624 / DSM 980 / FGSC 10383) OX=515849 GN=PODANS_1_1455 PE=4 SV=1	B2A9Q7	B2A9Q7	#N/A	#N/A			0.838044	0.515179	0.898813	0.288042	-0.153907	-0.713098	-0.153907	-0.713098	1	1	1	26.7409	26.0717	26.6175	26.4332	26.329	26.2061						1	1	1	1.5	1.5	1.5	49.487	0.00074627	2.6525	554140000	6	1	1	1	1	1	1	1	1	1	1
tr|A0A090CE83|A0A090CE83_PODAN Uncharacterized protein OS=Podospora anserina (strain S / ATCC MYA-4624 / DSM 980 / FGSC 10383) OX=515849 PE=4 SV=1	A0A090CE83	A0A090CE83	#N/A	#N/A			0.877451	0.570225	0.155848	0.243954	-2.68179	-0.617665	-2.68179	-0.617665	2	2	2	24.0871	27.9979	27.9287	28.1675	28.1013	15.6994						2	2	2	2.1	2.1	2.1	82.466	0.0083333	1.7194	1440000000	9	1	2	2	2	2	2	1	2	2	2
tr|B2AM15|B2AM15_PODAN Podospora anserina S mat+ genomic DNA chromosome 1, supercontig 3 OS=Podospora anserina (strain S / ATCC MYA-4624 / DSM 980 / FGSC 10383) OX=515849 GN=PODANS_1_13920 PE=4 SV=1	B2AM15	B2AM15	#N/A	#N/A			0.924383	0.675166	0.933934	0.170589	-0.0986067	-0.451289	-0.0986067	-0.451289	1	1	1	24.5962	24.1813	24.1881	24.0126	24.5599	24.0974						1	1	1	0.3	0.3	0.3	241.96	0.0057061	2.0492	123110000	3	1	1	1	1	1	1	1	1	1	1
tr|B2AWA3|B2AWA3_PODAN Podospora anserina S mat+ genomic DNA chromosome 7, supercontig 1 OS=Podospora anserina (strain S / ATCC MYA-4624 / DSM 980 / FGSC 10383) OX=515849 GN=PODANS_7_6480 PE=4 SV=1	B2AWA3	B2AWA3	#N/A	#N/A			0.941017	0.773888	0.970121	0.111322	-0.0437641	-0.307388	-0.0437641	-0.307388	1	1	1	26.5277	26.1126	26.2293	26.1404	26.3802	26.2177						1	1	1	4.9	4.9	4.9	17.363	0.0057021	2.047	565410000	9	1	1	1	1	1	1	1	1	1	1
tr|B2B6W2|B2B6W2_PODAN Podospora anserina S mat+ genomic DNA chromosome 2, supercontig 2 OS=Podospora anserina (strain S / ATCC MYA-4624 / DSM 980 / FGSC 10383) OX=515849 GN=PODANS_2_9090 PE=4 SV=1	B2B6W2	B2B6W2	#N/A	#N/A			0.961107	0.879075	1.05178	0.0559743	0.072834	0.162115	0.072834	0.162115	1	1	1	23.2466	23.6259	23.9261	24.4147	23.5774	23.025						1	1	1	0.7	0.7	0.7	106.18	0.006993	1.8344	82253000	6	1	1	1	1	1	1	1	1	1	1
tr|B2B481|B2B481_PODAN Podospora anserina S mat+ genomic DNA chromosome 2, supercontig 2 OS=Podospora anserina (strain S / ATCC MYA-4624 / DSM 980 / FGSC 10383) OX=515849 GN=PODANS_2_360 PE=4 SV=1	B2B481	B2B481	#N/A	#N/A			0.947368	0.788529	1.02703	0.103182	0.0384808	0.286771	0.0384808	0.286771	1	1	1	25.4466	25.8148	25.8443	25.8142	25.6747	25.7322						1	1	1	3	3	3	30.019	0.00074184	2.5764	333300000	8	1	1	1	1	1	1	1	1	1	1
tr|B2AT60|B2AT60_PODAN Podospora anserina S mat+ genomic DNA chromosome 1, supercontig 4 OS=Podospora anserina (strain S / ATCC MYA-4624 / DSM 980 / FGSC 10383) OX=515849 GN=PODANS_1_14760 PE=3 SV=1	B2AT60	B2AT60	#N/A	#N/A			0.708765	0.355549	1.32179	0.449101	0.402489	1.0437	0.402489	1.0437	2	2	2	25.6731	24.5855	24.6341	25.6622	25.1623	25.2756						2	2	2	9.2	9.2	9.2	63.326	0	14.374	235990000	4	1	1	1	1	2	1	1	1	1	1
tr|B2ATH0|B2ATH0_PODAN Podospora anserina S mat+ genomic DNA chromosome 1, supercontig 4 OS=Podospora anserina (strain S / ATCC MYA-4624 / DSM 980 / FGSC 10383) OX=515849 GN=PODANS_1_15830 PE=4 SV=1	B2ATH0	B2ATH0	#N/A	#N/A			0.68974	0.332713	4.37087	0.47793	2.12792	1.10096	2.12792	1.10096	1	1	1	16.866	15.6994	17.2443	16.6994	17.0153	22.4788						1	1	1	15.9	15.9	15.9	9.835	0.005694	2.0349	6358800	1	1	0	1	1	1	1	1	0	1	1
tr|B2B5L1|B2B5L1_PODAN Pah2 homeobox protein encoded by the pah2 protein OS=Podospora anserina (strain S / ATCC MYA-4624 / DSM 980 / FGSC 10383) OX=515849 GN=PODANS_2_4990 PE=4 SV=1	B2B5L1	B2B5L1	#N/A	#N/A			0.61494	0.284141	12.5894	0.546466	3.65413	1.23582	3.65413	1.23582	1	1	1	15.6994	24.5305	24.5803	25.5805	25.1811	25.0109						1	1	1	1	1	1	76.233	0.0083218	1.7145	171350000	4	0	1	1	1	1	1	0	1	1	1
tr|B2B1H0|B2B1H0_PODAN Podospora anserina S mat+ genomic DNA chromosome 3, supercontig 2 OS=Podospora anserina (strain S / ATCC MYA-4624 / DSM 980 / FGSC 10383) OX=515849 GN=PODANS_3_10100 PE=4 SV=1	B2B1H0	B2B1H0	#N/A	#N/A			0.540712	0.214299	4.04946	0.66898	2.01773	1.47475	2.01773	1.47475	2	2	2	28.9673	29.5808	30.8804	30.2502	30.9436	34.288						2	2	2	2.7	2.7	2.7	119.42	0.0043134	2.1821	27622000000	4	2	2	2	2	2	2	2	2	2	2
sp|P19041|NU1M_PODAN NADH-ubiquinone oxidoreductase chain 1 OS=Podospora anserina (strain S / ATCC MYA-4624 / DSM 980 / FGSC 10383) OX=515849 GN=ND1 PE=3 SV=2	P19041	P19041	#N/A	#N/A			0.49997	0.185786	16.4377	0.730988	4.03894	1.59571	4.03894	1.59571	1	1	1	15.6994	21.7382	24.1098	23.9944	24.4109	25.2589						1	1	1	2.2	2.2	2.2	41.079	0.0043478	2.2402	100770000	2	0	1	1	1	1	1	0	1	1	1
tr|B2B1I8|B2B1I8_PODAN Podospora anserina S mat+ genomic DNA chromosome 3, supercontig 2 OS=Podospora anserina (strain S / ATCC MYA-4624 / DSM 980 / FGSC 10383) OX=515849 GN=PODANS_3_10260 PE=4 SV=1	B2B1I8	B2B1I8	#N/A	#N/A			0.486715	0.150685	1.39116	0.821931	0.476291	1.77429	0.476291	1.77429	1	1	1	22.6502	23.2465	23.4169	23.3163	23.7535	23.6726						1	1	1	8.3	8.3	8.3	15.584	0.0057184	2.0551	65690000	7	1	1	1	1	1	1	1	1	1	1
tr|B2B542|B2B542_PODAN AdoMet-dependent rRNA methyltransferase SPB1 OS=Podospora anserina (strain S / ATCC MYA-4624 / DSM 980 / FGSC 10383) OX=515849 GN=SPB1 PE=3 SV=1	B2B542	B2B542		AdoMet-dependent rRNA methyltransferase SPB1		+	0.34595	0.0331546	1.60233	1.47946	0.680173	3.19195	0.680173	3.19195	1	1	1	25.6864	26.0887	26.1969	26.4012	26.709	26.9023					KO_0h_WT_0h	1	1	1	1.4	1.4	1.4	107.47	0.0096819	1.6871	526030000	3	1	1	1	1	1	1	1	1	1	1
tr|B2B761|B2B761_PODAN Podospora anserina S mat+ genomic DNA chromosome 2, supercontig 2 OS=Podospora anserina (strain S / ATCC MYA-4624 / DSM 980 / FGSC 10383) OX=515849 GN=PODANS_2_10020 PE=4 SV=1	B2B761	B2B761					0.409089	0.0867007	1.68008	1.06198	0.748528	2.25979	0.748528	2.25979	3	3	3	23.2102	23.0218	23.1837	23.3797	23.7864	24.4953						3	3	3	19.5	19.5	19.5	23.109	0	9.1611	76779000	6	1	2	2	1	3	3	1	2	2	1
tr|B2AEW8|B2AEW8_PODAN Podospora anserina S mat+ genomic DNA chromosome 5, supercontig 1 OS=Podospora anserina (strain S / ATCC MYA-4624 / DSM 980 / FGSC 10383) OX=515849 GN=PODANS_5_1280 PE=4 SV=1	B2AEW8	B2AEW8	CHDH	Choline dehydrogenase		+	0.322807	0.0231388	1.59454	1.63566	0.67314	3.5814	0.67314	3.5814	15	15	15	29.9244	30.4628	30.4815	31.0377	30.8846	30.9657					KO_0h_WT_0h	15	15	15	33.4	33.4	33.4	64.991	0	235	10555000000	115	12	15	10	11	12	13	12	15	10	11
			#N/A	#N/A					1
tr|B2AZ56|B2AZ56_PODAN Acyl-CoA desaturase OS=Podospora anserina (strain S / ATCC MYA-4624 / DSM 980 / FGSC 10383) OX=515849 GN=PODANS_3_4190 PE=3 SV=1	B2AZ56	B2AZ56		Acyl-CoA desaturase		+	0.339286	0.0342508	1.59025	1.46533	0.66925	3.15797	0.66925	3.15797	4	4	4	28.1495	28.4096	28.7608	29.0442	28.9481	29.3353					KO_0h_WT_0h	4	4	4	8.2	8.2	8.2	53.802	0	62.266	2858000000	23	3	3	3	4	4	3	3	3	3	4
tr|B2B2N4|B2B2N4_PODAN Eukaryotic translation initiation factor 3 subunit G OS=Podospora anserina (strain S / ATCC MYA-4624 / DSM 980 / FGSC 10383) OX=515849 GN=TIF35 PE=3 SV=1	B2B2N4	B2B2N4					0.386835	0.0584212	1.66423	1.23343	0.734854	2.62615	0.734854	2.62615	3	3	3	26.0844	26.4195	26.9795	27.3083	27.0294	27.3503						3	3	3	16.2	16.2	16.2	32.611	0	51.427	767510000	24	3	3	3	3	3	3	3	3	3	3
tr|B2AZR2|B2AZR2_PODAN Autophagy-related protein OS=Podospora anserina (strain S / ATCC MYA-4624 / DSM 980 / FGSC 10383) OX=515849 GN=PODANS_3_5250 PE=3 SV=1	B2AZR2	B2AZR2					0.378776	0.0606941	1.66233	1.21685	0.733209	2.58984	0.733209	2.58984	6	6	6	28.081	28.6615	29.047	29.4019	29.301	29.2862						6	6	6	38.8	38.8	38.8	14.025	0	24.344	3288600000	67	6	5	5	5	6	6	6	5	5	5
tr|B2B6H8|B2B6H8_PODAN Podospora anserina S mat+ genomic DNA chromosome 2, supercontig 2 OS=Podospora anserina (strain S / ATCC MYA-4624 / DSM 980 / FGSC 10383) OX=515849 GN=PODANS_2_7820 PE=4 SV=1	B2B6H8	B2B6H8					0.405754	0.0839616	1.65818	1.07592	0.729597	2.28887	0.729597	2.28887	4	4	4	27.673	27.3497	26.7079	27.7115	28.2144	27.9935						4	4	4	13.1	13.1	13.1	44.186	0	91.151	1293100000	12	2	2	2	4	3	3	2	2	2	4
tr|A0A090D5Y6|A0A090D5Y6_PODAN Putative fungal-specific cytosolic translation elongation factor 3 (EEF3) OS=Podospora anserina (strain S / ATCC MYA-4624 / DSM 980 / FGSC 10383) OX=515849 PE=4 SV=1	A0A090D5Y6	A0A090D5Y6					0.399455	0.0880019	1.65163	1.05551	0.723892	2.24633	0.723892	2.24633	8	8	8	29.1766	29.0025	29.6703	29.7304	29.779	30.5116						8	8	8	12.7	12.7	12.7	116.92	0	44.728	5341700000	49	6	7	6	7	6	6	6	7	6	7
tr|B2AP75|B2AP75_PODAN Patrx3 thioredoxin encoded by the PaTrx3 protein OS=Podospora anserina (strain S / ATCC MYA-4624 / DSM 980 / FGSC 10383) OX=515849 GN=PODANS_7_210 PE=4 SV=1	B2AP75	B2AP75					0.40119	0.0871433	1.62625	1.05977	0.701551	2.25519	0.701551	2.25519	3	3	3	25.9846	26.8654	26.794	27.5056	27.1644	27.0787						3	3	3	25.8	25.8	25.8	13.797	0	33.949	787730000	39	3	3	3	3	3	3	3	3	3	3
tr|B2AUK0|B2AUK0_PODAN Podospora anserina S mat+ genomic DNA chromosome 1, supercontig 4 OS=Podospora anserina (strain S / ATCC MYA-4624 / DSM 980 / FGSC 10383) OX=515849 GN=PODANS_1_19370 PE=3 SV=1	B2AUK0	B2AUK0					0.397488	0.0572565	1.62007	1.24218	0.69606	2.6454	0.69606	2.6454	3	3	3	22.5799	22.767	22.8945	23.5345	22.9776	23.8176						3	3	3	16.6	16.6	16.6	17.551	0	3.7158	56399000	3	1	1	1	2	2	1	1	1	1	2
tr|B2AM00|B2AM00_PODAN Dihydrolipoamide acetyltransferase component of pyruvate dehydrogenase complex OS=Podospora anserina (strain S / ATCC MYA-4624 / DSM 980 / FGSC 10383) OX=515849 GN=PODANS_1_13390 PE=3 SV=1	B2AM00	B2AM00	DBT	Dihydrolipoamide branched chain transacylase E2; The branched-chain alpha-keto dehydrogenase complex catalyzes the overall conversion of alpha-keto acids to acyl-CoA and CO(2)			0.37985	0.0605584	1.6069	1.21783	0.684278	2.59196	0.684278	2.59196	3	3	3	26.5908	27.4664	26.9692	27.6424	27.5987	27.838						3	3	3	6.4	6.4	6.4	56.679	0	15.384	1070600000	14	2	2	3	3	3	3	2	2	3	3
tr|B2B0C8|B2B0C8_PODAN Podospora anserina S mat+ genomic DNA chromosome 3, supercontig 2 OS=Podospora anserina (strain S / ATCC MYA-4624 / DSM 980 / FGSC 10383) OX=515849 GN=PODANS_3_8690 PE=4 SV=1	B2B0C8	B2B0C8		Hsp90 associated co-chaperone		+	0.328655	0.0229261	1.58991	1.63967	0.668946	3.59174	0.668946	3.59174	5	5	5	29.6233	30.1342	29.9214	30.5841	30.3563	30.7453					KO_0h_WT_0h	5	5	5	28.9	28.9	28.9	22.568	0	35.277	7806400000	40	5	4	4	4	5	4	5	4	4	4
tr|A0A090CSH2|A0A090CSH2_PODAN Uncharacterized protein OS=Podospora anserina (strain S / ATCC MYA-4624 / DSM 980 / FGSC 10383) OX=515849 PE=4 SV=1	A0A090CSH2	A0A090CSH2					0.398241	0.0549459	1.59976	1.26006	0.677853	2.68494	0.677853	2.68494	2	2	2	23.1625	23.9154	23.5168	24.0657	24.0973	24.4653						2	2	2	4.4	4.4	4.4	48.427	0.0036523	2.3319	95882000	1	2	2	2	1	1	1	2	2	2	1
tr|A0A090CC53|A0A090CC53_PODAN Uncharacterized protein OS=Podospora anserina (strain S / ATCC MYA-4624 / DSM 980 / FGSC 10383) OX=515849 PE=4 SV=1	A0A090CC53	A0A090CC53		domain from ZNF706/At2g23090 superfamily			0.396628	0.0772099	1.59763	1.11233	0.675936	2.36537	0.675936	2.36537	4	4	4	27.4703	27.0479	27.6669	28.4293	27.6712	28.1125						4	4	4	53.2	53.2	53.2	8.5917	0	24.563	1403200000	25	3	4	4	3	4	4	3	4	4	3
tr|B2B7C9|B2B7C9_PODAN Glutaredoxin OS=Podospora anserina (strain S / ATCC MYA-4624 / DSM 980 / FGSC 10383) OX=515849 GN=PODANS_2_10680 PE=3 SV=1	B2B7C9	B2B7C9	GLRX5	Iron-sulfur-cluster biogenesis		+	0.356368	0.0375604	1.58108	1.42527	0.660909	3.06267	0.660909	3.06267	7	7	7	28.4363	28.8932	29.1412	29.5297	29.5635	29.3603					KO_0h_WT_0h	7	7	7	43.7	43.7	43.7	17.393	0	55.667	3711500000	73	7	7	7	7	7	7	7	7	7	7
tr|A0A090C9D6|A0A090C9D6_PODAN Aminopeptidase OS=Podospora anserina (strain S / ATCC MYA-4624 / DSM 980 / FGSC 10383) OX=515849 PE=3 SV=1	A0A090C9D6	A0A090C9D6	Npepps	Aminopeptidase puromycin sensitive; Aminopeptidase with broad substrate specificity for several peptides. Involved in proteolytic events essential for cell growth and viability. May act as regulator of neuropeptide activity. Plays a role in the antigen-processing pathway for MHC class I molecules.		+	0.106857	0.00136909	1.57626	2.86357	0.656507	7.92967	0.656507	7.92967	3	3	3	26.0473	25.9991	26.0429	26.5249	26.7848	26.7491					KO_0h_WT_0h	3	3	3	3.3	3.3	3.3	99.11	0	6.7299	530510000	14	3	3	3	3	3	2	3	3	3	3
tr|B2AR87|B2AR87_PODAN 3-hydroxy-3-methylglutaryl coenzyme A synthase OS=Podospora anserina (strain S / ATCC MYA-4624 / DSM 980 / FGSC 10383) OX=515849 GN=PODANS_4_8290 PE=3 SV=1	B2AR87	B2AR87		3-hydroxy-3-methylglutaryl coenzyme A synthase in isoprenoid and steroid synthesis pathway		+	0.368133	0.0392417	1.56707	1.40625	0.648069	3.01796	0.648069	3.01796	13	13	13	31.2068	31.1953	30.979	32.1654	31.4926	31.6673					KO_0h_WT_0h	13	13	13	34.8	34.8	34.8	51.186	0	93.138	18349000000	90	10	10	9	12	12	10	10	10	9	12
tr|A0A090D6E8|A0A090D6E8_PODAN Putative Cytochrome c oxidase polypeptide VIb OS=Podospora anserina (strain S / ATCC MYA-4624 / DSM 980 / FGSC 10383) OX=515849 PE=4 SV=1	A0A090D6E8	A0A090D6E8	Coxb1	Cytochrome c oxidase, subunit VIb polypeptide 1		+	0.263143	0.00998614	1.55859	2.0006	0.64024	4.60594	0.64024	4.60594	4	4	4	30.6896	30.7937	31.1319	31.577	31.4428	31.5162					KO_0h_WT_0h	4	4	4	31.3	31.3	31.3	13.658	0	36.67	15192000000	64	4	4	4	4	4	4	4	4	4	4
tr|B2AVE7|B2AVE7_PODAN Podospora anserina S mat+ genomic DNA chromosome 7, supercontig 1 OS=Podospora anserina (strain S / ATCC MYA-4624 / DSM 980 / FGSC 10383) OX=515849 GN=PODANS_7_3200 PE=4 SV=1	B2AVE7	B2AVE7	Snrpd2	Small nuclear ribonucleoprotein D2; Core component of the spliceosomal U1, U2, U4 and U5 small nuclear ribonucleoproteins (snRNPs), the building blocks of the spliceosome.		+	0.413282	0.0494474	1.55636	1.30586	0.63818	2.78732	0.63818	2.78732	2	2	2	25.6434	26.4125	26.1489	26.6306	26.7579	26.7309					KO_0h_WT_0h	2	2	2	19.8	19.8	19.8	13.296	0	37.168	544910000	13	1	1	1	1	2	1	1	1	1	1
tr|B2AMV3|B2AMV3_PODAN Peptidylprolyl isomerase OS=Podospora anserina (strain S / ATCC MYA-4624 / DSM 980 / FGSC 10383) OX=515849 GN=PODANS_5_5270 PE=4 SV=1	B2AMV3	B2AMV3					0.396571	0.0566064	1.57277	1.24713	0.653307	2.65633	0.653307	2.65633	4	4	4	27.666	27.7656	28.2494	28.668	28.7568	28.2161						4	4	4	21.1	21.1	21.1	19.601	0	15.057	1965700000	14	4	4	4	4	4	3	4	4	4	4
tr|B2API3|B2API3_PODAN Podospora anserina S mat+ genomic DNA chromosome 5, supercontig 10 OS=Podospora anserina (strain S / ATCC MYA-4624 / DSM 980 / FGSC 10383) OX=515849 GN=PODANS_5_10420 PE=4 SV=1	B2API3	B2API3					0.398407	0.057919	1.57217	1.23718	0.652761	2.6344	0.652761	2.6344	3	3	3	27.4914	27.3306	27.3886	28.4484	27.6108	28.1097						3	3	3	10.1	10.1	10.1	37.148	0	43.5	1394100000	15	2	3	3	3	3	1	2	3	3	3
tr|B2ALZ4|B2ALZ4_PODAN MtHMG1 mitochondrial protein encoded by the mthmg1 protein OS=Podospora anserina (strain S / ATCC MYA-4624 / DSM 980 / FGSC 10383) OX=515849 GN=PODANS_1_13340 PE=4 SV=1	B2ALZ4	B2ALZ4					0.42586	0.0978414	1.57156	1.00948	0.6522	2.15128	0.6522	2.15128	2	2	2	25.2574	25.5043	24.8783	26.3345	25.5244	25.7377						2	2	2	6.6	6.6	6.6	34.461	0	6.2309	307380000	9	2	1	2	2	1	1	2	1	2	2
tr|B2AUB9|B2AUB9_PODAN Podospora anserina S mat+ genomic DNA chromosome 1, supercontig 4 OS=Podospora anserina (strain S / ATCC MYA-4624 / DSM 980 / FGSC 10383) OX=515849 GN=PODANS_1_18610 PE=4 SV=1	B2AUB9	B2AUB9					0.423871	0.0982609	1.56816	1.00762	0.649071	2.14746	0.649071	2.14746	2	2	2	23.5739	24.2368	23.6256	24.1784	24.3231	24.8821						2	2	2	8.4	8.4	8.4	42.987	0	10.745	116090000	3	1	1	1	1	2	1	1	1	1	1
tr|B2B590|B2B590_PODAN Podospora anserina S mat+ genomic DNA chromosome 2, supercontig 2 OS=Podospora anserina (strain S / ATCC MYA-4624 / DSM 980 / FGSC 10383) OX=515849 GN=PODANS_2_3890 PE=3 SV=1	B2B590	B2B590					0.419911	0.100687	0.600771	0.997025	-0.735112	-2.12576	-0.735112	-2.12576	6	6	6	28.2255	27.2255	27.722	27.3552	26.897	26.7153						6	6	6	10.9	10.9	10.9	64	0	35.536	1099000000	12	6	4	4	3	3	2	6	4	4	3
tr|B2AXA0|B2AXA0_PODAN Podospora anserina S mat+ genomic DNA chromosome 7, supercontig 1 OS=Podospora anserina (strain S / ATCC MYA-4624 / DSM 980 / FGSC 10383) OX=515849 GN=PODANS_7_9830 PE=4 SV=1	B2AXA0	B2AXA0					0.414386	0.10105	0.855929	0.995463	-0.224436	-2.12256	-0.224436	-2.12256	6	6	6	28.6611	28.5433	28.8456	28.3422	28.5285	28.506						6	6	6	31.1	31.1	31.1	41.08	0	67.001	2406700000	26	4	5	6	6	6	5	4	5	6	6
tr|B2AVZ3|B2AVZ3_PODAN Podospora anserina S mat+ genomic DNA chromosome 7, supercontig 1 OS=Podospora anserina (strain S / ATCC MYA-4624 / DSM 980 / FGSC 10383) OX=515849 GN=PODANS_7_5390 PE=4 SV=1	B2AVZ3	B2AVZ3					0.416209	0.101579	0.0170293	0.993196	-5.87584	-2.11793	-5.87584	-2.11793	1	1	1	24.0005	24.7555	24.2663	23.9959	15.6994	15.6994						1	1	1	2.2	2.2	2.2	65.036	0	7.0502	82013000	1	1	1	1	1	0	0	1	1	1	1
tr|B2AT83|B2AT83_PODAN Podospora anserina S mat+ genomic DNA chromosome 1, supercontig 4 OS=Podospora anserina (strain S / ATCC MYA-4624 / DSM 980 / FGSC 10383) OX=515849 GN=PODANS_1_14990 PE=4 SV=1	B2AT83	B2AT83					0.413155	0.101728	0.80572	0.99256	-0.311649	-2.11663	-0.311649	-2.11663	11	11	11	31.5081	31.0091	31.1713	30.903	30.9337	30.9168						11	11	11	43.4	43.4	43.4	38.82	0	152.34	13810000000	87	9	10	11	9	10	11	9	10	11	9
sp|B2AWF0|PURA_PODAN Adenylosuccinate synthetase OS=Podospora anserina (strain S / ATCC MYA-4624 / DSM 980 / FGSC 10383) OX=515849 GN=Pa_7_6930 PE=3 SV=1	B2AWF0	B2AWF0					0.418915	0.103775	0.812592	0.983909	-0.299397	-2.09896	-0.299397	-2.09896	9	9	9	29.9731	29.5876	29.6301	29.4452	29.5511	29.2964						9	9	9	28.5	28.5	28.5	47.084	0	97.26	4868500000	60	7	6	7	7	7	8	7	6	7	7
tr|B2AY82|B2AY82_PODAN Protein disulfide-isomerase OS=Podospora anserina (strain S / ATCC MYA-4624 / DSM 980 / FGSC 10383) OX=515849 GN=PODANS_1_10200 PE=3 SV=1	B2AY82	B2AY82					0.416583	0.104626	0.762347	0.980362	-0.391479	-2.09173	-0.391479	-2.09173	25	25	25	33.2771	32.7373	33.3029	32.7377	32.754	32.6511						25	25	25	56.7	56.7	56.7	55.138	0	323.31	49350000000	235	24	23	22	23	22	23	24	23	22	23
tr|B2ASL9|B2ASL9_PODAN Mitogen-activated protein kinase OS=Podospora anserina (strain S / ATCC MYA-4624 / DSM 980 / FGSC 10383) OX=515849 GN=PODANS_1_23930 PE=3 SV=1	B2ASL9	B2ASL9					0.415935	0.107224	0.612612	0.969709	-0.706955	-2.07005	-0.706955	-2.07005	3	3	3	27.568	27.4518	27.3535	26.1229	27.2713	26.8582						3	3	3	8.4	8.4	8.4	40.809	0	8.7389	910750000	10	3	3	3	3	3	3	3	3	3	3
tr|A0A090CJV2|A0A090CJV2_PODAN Nucleoside diphosphate kinase OS=Podospora anserina (strain S / ATCC MYA-4624 / DSM 980 / FGSC 10383) OX=515849 PE=3 SV=1	A0A090CJV2	A0A090CJV2					0.414251	0.107234	0.91455	0.969669	-0.128866	-2.06997	-0.128866	-2.06997	14	14	14	36.4935	36.4293	36.5989	36.3329	36.4535	36.3487						14	14	14	86.9	86.9	86.9	16.895	0	323.31	562340000000	389	14	14	14	14	14	14	14	14	14	14
tr|A0A090D6X7|A0A090D6X7_PODAN Uncharacterized protein OS=Podospora anserina (strain S / ATCC MYA-4624 / DSM 980 / FGSC 10383) OX=515849 PE=4 SV=1	A0A090D6X7	A0A090D6X7					0.415347	0.108584	0.471869	0.964234	-1.08354	-2.05893	-1.08354	-2.05893	1	1	1	27.2402	26.9216	26.7178	24.8728	26.4569	26.2993						1	1	1	3.8	3.8	3.8	40.131	0.003655	2.3378	601440000	7	1	1	1	1	1	1	1	1	1	1
tr|B2B824|B2B824_PODAN Podospora anserina S mat+ genomic DNA chromosome 2, supercontig 2 OS=Podospora anserina (strain S / ATCC MYA-4624 / DSM 980 / FGSC 10383) OX=515849 GN=PODANS_2_13060 PE=4 SV=1	B2B824	B2B824					0.413723	0.109142	0.07999	0.962009	-3.64404	-2.05442	-3.64404	-2.05442	2	2	2	23.2211	23.2234	21.4398	21.163	15.6994	20.0898						2	2	2	7.8	7.8	7.8	47.879	0	29.7	25880000	5	1	1	2	1	0	1	1	1	2	1
tr|B2B3M4|B2B3M4_PODAN Podospora anserina S mat+ genomic DNA chromosome 6, supercontig 2 OS=Podospora anserina (strain S / ATCC MYA-4624 / DSM 980 / FGSC 10383) OX=515849 GN=PODANS_6_6670 PE=3 SV=1	B2B3M4	B2B3M4					0.414848	0.111308	0.678365	0.953473	-0.559865	-2.03712	-0.559865	-2.03712	13	13	13	31.4034	30.6509	31.2574	30.31	30.8231	30.499						13	13	13	26.9	26.9	26.9	62.106	0	197.87	11841000000	69	13	13	13	12	12	13	13	13	13	12
tr|A0A090CPU5|A0A090CPU5_PODAN Putative 2-nitropropane dioxygenase OS=Podospora anserina (strain S / ATCC MYA-4624 / DSM 980 / FGSC 10383) OX=515849 PE=4 SV=1	A0A090CPU5	A0A090CPU5					0.414544	0.111956	0.0141471	0.950951	-6.14335	-2.03201	-6.14335	-2.03201	1	1	1	24.6855	24.6654	25.2302	15.6994	24.7523	15.6994						1	1	1	5.6	5.6	5.6	30.319	0	3.2741	121210000	3	1	1	1	0	1	0	1	1	1	0
tr|B2B4B9|B2B4B9_PODAN Podospora anserina S mat+ genomic DNA chromosome 2, supercontig 2 OS=Podospora anserina (strain S / ATCC MYA-4624 / DSM 980 / FGSC 10383) OX=515849 GN=PODANS_2_750 PE=4 SV=1	B2B4B9	B2B4B9					0.415621	0.113266	0.595604	0.9459	-0.747576	-2.02179	-0.747576	-2.02179	6	6	6	31.0962	30.9463	31.7338	29.9651	30.8922	30.6762						6	6	6	55.9	55.9	55.9	14.994	0	75.612	12693000000	75	6	6	6	6	6	6	6	6	6	6
tr|A0A090CRQ9|A0A090CRQ9_PODAN Uncharacterized protein OS=Podospora anserina (strain S / ATCC MYA-4624 / DSM 980 / FGSC 10383) OX=515849 PE=4 SV=1	A0A090CRQ9	A0A090CRQ9					0.417603	0.114517	0.472792	0.941131	-1.08072	-2.01216	-1.08072	-2.01216	1	1	1	27.3843	26.6524	26.7814	26.4269	26.2605	24.8886						1	1	1	7.4	7.4	7.4	22.944	0	21.216	597690000	7	1	1	1	1	1	1	1	1	1	1
tr|B2AFJ9|B2AFJ9_PODAN Podospora anserina S mat+ genomic DNA chromosome 5, supercontig 7 OS=Podospora anserina (strain S / ATCC MYA-4624 / DSM 980 / FGSC 10383) OX=515849 GN=PODANS_5_11830 PE=4 SV=1	B2AFJ9	B2AFJ9					0.419542	0.116306	0.576626	0.934397	-0.794291	-1.99857	-0.794291	-1.99857	23	23	23	32.0571	31.7715	32.2241	30.4942	31.4368	31.7388						23	23	23	48.9	48.9	48.9	67.009	0	307	21154000000	103	22	19	22	15	20	21	22	19	22	15
tr|B2AD83|B2AD83_PODAN Podospora anserina S mat+ genomic DNA chromosome 4, supercontig 1 OS=Podospora anserina (strain S / ATCC MYA-4624 / DSM 980 / FGSC 10383) OX=515849 GN=PODANS_4_370 PE=4 SV=1	B2AD83	B2AD83					0.422633	0.119783	0.156024	0.921604	-2.68016	-1.97281	-2.68016	-1.97281	3	3	3	25.9273	26.8611	26.0669	22.0272	26.2421	22.5455						3	3	3	10.2	10.2	10.2	33.401	0	18.344	345760000	9	2	2	1	1	2	1	2	2	1	1
tr|B2ANV3|B2ANV3_PODAN Podospora anserina S mat+ genomic DNA chromosome 7, supercontig 3 OS=Podospora anserina (strain S / ATCC MYA-4624 / DSM 980 / FGSC 10383) OX=515849 GN=PODANS_7_1340 PE=4 SV=1	B2ANV3	B2ANV3					0.427676	0.122333	0.79604	0.912457	-0.329087	-1.95444	-0.329087	-1.95444	4	4	4	28.1673	27.6916	28.1265	27.5538	27.8001	27.6442						4	4	4	14.1	14.1	14.1	42.418	0	50.627	1451700000	28	4	4	4	3	4	4	4	4	4	3
tr|A0A090CIM7|A0A090CIM7_PODAN Putative Phosphoenolpyruvate carboxykinase [ATP] OS=Podospora anserina (strain S / ATCC MYA-4624 / DSM 980 / FGSC 10383) OX=515849 PE=3 SV=1	A0A090CIM7	A0A090CIM7					0.43901	0.128349	0.793669	0.891608	-0.333391	-1.91268	-0.333391	-1.91268	9	9	9	29.2229	29.0901	29.59	28.79	29.0352	29.0777						9	9	9	18.2	18.2	18.2	75.633	0	123.9	3587000000	39	9	9	9	8	7	8	9	9	9	8
tr|A0A090C8N0|A0A090C8N0_PODAN Uncharacterized protein OS=Podospora anserina (strain S / ATCC MYA-4624 / DSM 980 / FGSC 10383) OX=515849 PE=3 SV=1	A0A090C8N0	A0A090C8N0					0.439728	0.129301	0.00210625	0.8884	-8.89111	-1.90627	-8.89111	-1.90627	3	2	2	28.954	29.4106	29.3921	29.6847	15.6994	15.6994						3	2	2	5.6	4	4	75.803	0	8.516	3549100000	5	2	2	2	2	2	2	1	1	1	1
tr|B2B0I7|B2B0I7_PODAN Podospora anserina S mat+ genomic DNA chromosome 3, supercontig 2 OS=Podospora anserina (strain S / ATCC MYA-4624 / DSM 980 / FGSC 10383) OX=515849 GN=PODANS_3_5920 PE=4 SV=1	B2B0I7	B2B0I7					0.441691	0.130864	0.766933	0.883181	-0.382828	-1.89585	-0.382828	-1.89585	2	2	2	30.3158	30.4079	30.476	30.1721	30.2524	29.6268						2	2	2	36.4	36.4	36.4	10.585	0	138.91	7572400000	33	1	2	2	2	2	2	1	2	2	2
tr|B2AV85|B2AV85_PODAN Podospora anserina S mat+ genomic DNA chromosome 7, supercontig 1 OS=Podospora anserina (strain S / ATCC MYA-4624 / DSM 980 / FGSC 10383) OX=515849 GN=PODANS_7_3780 PE=4 SV=1	B2AV85	B2AV85					0.444656	0.131569	0.809721	0.880846	-0.304504	-1.89119	-0.304504	-1.89119	3	3	3	26.1845	25.7611	26.1119	25.7118	25.8789	25.5533						3	3	3	12.3	12.3	12.3	33.825	0	14.241	371560000	8	2	1	2	2	2	1	2	1	2	2
tr|B2AFG1|B2AFG1_PODAN Podospora anserina S mat+ genomic DNA chromosome 5, supercontig 3 OS=Podospora anserina (strain S / ATCC MYA-4624 / DSM 980 / FGSC 10383) OX=515849 GN=PODANS_5_12830 PE=4 SV=1	B2AFG1	B2AFG1					0.444465	0.132136	0.752938	0.878978	-0.409398	-1.88747	-0.409398	-1.88747	2	2	2	26.8708	26.7745	27.3545	26.8225	26.5394	26.4098						2	2	2	20.8	20.8	20.8	16.013	0	8.115	714480000	13	2	2	2	1	2	2	2	2	2	1
tr|B2B079|B2B079_PODAN Podospora anserina S mat+ genomic DNA chromosome 3, supercontig 2 OS=Podospora anserina (strain S / ATCC MYA-4624 / DSM 980 / FGSC 10383) OX=515849 GN=PODANS_3_8220 PE=4 SV=1	B2B079	B2B079					0.461424	0.137874	0.888471	0.860517	-0.170603	-1.85072	-0.170603	-1.85072	13	13	13	32.3589	32.2497	32.2174	32.0971	32.2498	31.9673						13	13	13	35	35	35	47.329	0	249.11	29659000000	95	11	12	11	13	12	12	11	12	11	13
tr|B2APQ9|B2APQ9_PODAN Podospora anserina S mat+ genomic DNA chromosome 5, supercontig 10 OS=Podospora anserina (strain S / ATCC MYA-4624 / DSM 980 / FGSC 10383) OX=515849 GN=PODANS_5_11210 PE=4 SV=1	B2APQ9	B2APQ9					0.462229	0.139852	0.733337	0.854332	-0.447453	-1.83844	-0.447453	-1.83844	17	17	17	36.4398	36.2007	36.1621	35.5241	36.267	35.6691						17	17	17	77.7	77.7	77.7	31.322	0	323.31	436620000000	315	17	17	17	16	17	17	17	17	17	16
tr|B2B5G5|B2B5G5_PODAN Podospora anserina S mat+ genomic DNA chromosome 2, supercontig 2 OS=Podospora anserina (strain S / ATCC MYA-4624 / DSM 980 / FGSC 10383) OX=515849 GN=PODANS_2_4600 PE=4 SV=1	B2B5G5	B2B5G5					0.485242	0.14713	0.791341	0.832298	-0.337629	-1.79478	-0.337629	-1.79478	9	9	9	30.9415	30.6648	30.8109	30.1855	30.7741	30.4448						9	9	9	30.8	30.8	30.8	37.381	0	97.807	10167000000	84	7	7	7	6	7	6	7	7	7	6
tr|B2B2Z5|B2B2Z5_PODAN Podospora anserina S mat+ genomic DNA chromosome 6, supercontig 2 OS=Podospora anserina (strain S / ATCC MYA-4624 / DSM 980 / FGSC 10383) OX=515849 GN=PODANS_6_1590 PE=3 SV=1	B2B2Z5	B2B2Z5					0.486899	0.149708	0.894893	0.824755	-0.160213	-1.77986	-0.160213	-1.77986	11	11	11	31.4446	31.1896	31.4086	31.2711	31.1429	31.1482						11	11	11	33.9	33.9	33.9	44.976	0	93.875	15593000000	86	11	11	11	10	10	10	11	11	11	10
tr|B2B0V8|B2B0V8_PODAN Podospora anserina S mat+ genomic DNA chromosome 3, supercontig 2 OS=Podospora anserina (strain S / ATCC MYA-4624 / DSM 980 / FGSC 10383) OX=515849 GN=PODANS_3_7460 PE=3 SV=1	B2B0V8	B2B0V8					0.486037	0.149884	0.849351	0.824246	-0.235568	-1.77886	-0.235568	-1.77886	28	28	28	36.934	36.7535	36.5678	36.4027	36.67	36.4758						28	28	28	77.1	77.1	77.1	37.325	0	323.31	654930000000	581	25	24	24	24	26	25	25	24	24	24
tr|B2B2X8|B2B2X8_PODAN Podospora anserina S mat+ genomic DNA chromosome 6, supercontig 2 OS=Podospora anserina (strain S / ATCC MYA-4624 / DSM 980 / FGSC 10383) OX=515849 GN=PODANS_6_1760 PE=4 SV=1	B2B2X8	B2B2X8					0.486284	0.154906	0.916828	0.809931	-0.125277	-1.75061	-0.125277	-1.75061	3	3	3	27.6844	27.5198	27.6301	27.4859	27.395	27.5776						3	3	3	14.9	14.9	14.9	37.794	0	39.011	1180600000	15	3	3	3	3	3	3	3	3	3	3
tr|A0A090CXI7|A0A090CXI7_PODAN Putative transcriptional repressor rco-1 OS=Podospora anserina (strain S / ATCC MYA-4624 / DSM 980 / FGSC 10383) OX=515849 PE=4 SV=1	A0A090CXI7	A0A090CXI7					0.490795	0.158001	0.597613	0.80134	-0.742717	-1.73368	-0.742717	-1.73368	4	4	4	27.509	26.715	27.2289	27.1112	25.9231	26.1905						4	4	4	11.2	11.2	11.2	67.95	0	31.144	747460000	13	3	2	4	4	3	3	3	2	4	4
tr|B2AAB7|B2AAB7_PODAN Glucose-6-phosphate 1-epimerase OS=Podospora anserina (strain S / ATCC MYA-4624 / DSM 980 / FGSC 10383) OX=515849 GN=PODANS_1_3490 PE=3 SV=1	B2AAB7	B2AAB7					0.494501	0.161254	0.860672	0.79249	-0.216465	-1.71626	-0.216465	-1.71626	11	11	11	32.1427	32.0903	32.0121	31.7032	32.1002	31.7923						11	11	11	49.7	49.7	49.7	34.282	0	317.5	25480000000	104	11	10	11	11	10	10	11	10	11	11
tr|B2ATG8|B2ATG8_PODAN Sterol 24-C-methyltransferase OS=Podospora anserina (strain S / ATCC MYA-4624 / DSM 980 / FGSC 10383) OX=515849 GN=PODANS_1_15810 PE=3 SV=1	B2ATG8	B2ATG8					0.496114	0.163361	0.582291	0.786852	-0.780188	-1.70518	-0.780188	-1.70518	1	1	1	26.2162	26.2454	26.5799	26.4198	24.9363	25.3448						1	1	1	2.6	2.6	2.6	42.829	0	16.132	422310000	8	1	1	1	1	1	1	1	1	1	1
tr|B2B7S8|B2B7S8_PODAN Ubiquitin carboxyl-terminal hydrolase OS=Podospora anserina (strain S / ATCC MYA-4624 / DSM 980 / FGSC 10383) OX=515849 GN=PODANS_2_12120 PE=3 SV=1	B2B7S8	B2B7S8					0.505844	0.170144	0.0467278	0.769183	-4.41958	-1.67049	-4.41958	-1.67049	1	1	1	21.8712	23.026	23.2886	15.6994	23.5283	15.6994						1	1	1	3.3	3.3	3.3	37.325	0.0014717	2.4709	34722000	3	1	1	1	1	1	1	1	1	1	1
tr|B2APB7|B2APB7_PODAN Podospora anserina S mat+ genomic DNA chromosome 5, supercontig 10 OS=Podospora anserina (strain S / ATCC MYA-4624 / DSM 980 / FGSC 10383) OX=515849 GN=PODANS_5_10500 PE=4 SV=1	B2APB7	B2APB7					0.504917	0.170624	0.67905	0.76796	-0.558411	-1.66809	-0.558411	-1.66809	3	3	3	28.0012	28.2042	27.3426	26.8888	27.3824	27.6016						3	3	3	12.2	12.2	12.2	28.897	0	11.38	1251000000	2	3	3	3	3	3	3	3	3	3	3
tr|B2A9R1|B2A9R1_PODAN Podospora anserina S mat+ genomic DNA chromosome 1, supercontig 1 OS=Podospora anserina (strain S / ATCC MYA-4624 / DSM 980 / FGSC 10383) OX=515849 GN=PODANS_1_1490 PE=3 SV=1	B2A9R1	B2A9R1					0.506303	0.171452	0.0192516	0.765857	-5.69888	-1.66396	-5.69888	-1.66396	2	2	2	24.8328	25.2655	24.3398	15.6994	25.9427	15.6994						2	2	2	9	9	9	39.804	0	6.0237	155950000	4	2	2	1	0	2	0	2	2	1	0
tr|A0A090CNB4|A0A090CNB4_PODAN Copper transport encoded by the Pactr3 protein OS=Podospora anserina (strain S / ATCC MYA-4624 / DSM 980 / FGSC 10383) OX=515849 PE=4 SV=1	A0A090CNB4	A0A090CNB4					0.504523	0.172634	0.00615579	0.762875	-7.34384	-1.65812	-7.34384	-1.65812	2	2	2	27.9214	28.7099	25.4561	15.6994	28.6571	15.6994						2	2	2	13	13	13	21.116	0	108.36	1162600000	5	1	1	1	0	2	0	1	1	1	0
tr|B2B035|B2B035_PODAN Podospora anserina S mat+ genomic DNA chromosome 3, supercontig 2 OS=Podospora anserina (strain S / ATCC MYA-4624 / DSM 980 / FGSC 10383) OX=515849 GN=PODANS_3_6160 PE=4 SV=1	B2B035	B2B035					0.50246	0.174602	0.724644	0.75795	-0.464655	-1.64847	-0.464655	-1.64847	1	1	1	23.3262	23.261	23.7983	22.9562	23.4064	22.6289						1	1	1	4.8	4.8	4.8	25.435	0.0036417	2.3152	60900000	7	1	1	1	1	1	1	1	1	1	1
tr|B2AYY2|B2AYY2_PODAN Podospora anserina S mat+ genomic DNA chromosome 1, supercontig 2 OS=Podospora anserina (strain S / ATCC MYA-4624 / DSM 980 / FGSC 10383) OX=515849 GN=PODANS_1_12620 PE=4 SV=1	B2AYY2	B2AYY2					0.506453	0.175976	0.627325	0.754547	-0.672716	-1.6418	-0.672716	-1.6418	2	2	2	26.1226	25.5707	25.7894	25.8648	25.0196	24.58						2	2	2	17.8	17.8	17.8	11.033	0	3.8767	301090000	7	1	1	1	1	2	1	1	1	1	1
tr|B2B0Q4|B2B0Q4_PODAN Podospora anserina S mat+ genomic DNA chromosome 3, supercontig 2 OS=Podospora anserina (strain S / ATCC MYA-4624 / DSM 980 / FGSC 10383) OX=515849 GN=PODANS_3_6930 PE=3 SV=1	B2B0Q4	B2B0Q4					0.504042	0.176821	0.736727	0.752465	-0.440797	-1.63772	-0.440797	-1.63772	24	24	24	35.0501	34.1228	34.6045	34.1154	34.2054	34.1342						24	24	24	69.5	69.5	69.5	48.855	0	323.31	137770000000	271	22	23	23	23	23	23	22	23	23	23
tr|B2AKW7|B2AKW7_PODAN Podospora anserina S mat+ genomic DNA chromosome 5, supercontig 9 OS=Podospora anserina (strain S / ATCC MYA-4624 / DSM 980 / FGSC 10383) OX=515849 GN=PODANS_5_9150 PE=3 SV=1	B2AKW7	B2AKW7					0.504547	0.177415	0.758569	0.75101	-0.398647	-1.63487	-0.398647	-1.63487	18	18	18	32.009	31.2365	31.5073	31.3336	31.2028	31.0205						18	18	18	38	38	38	56.903	0	173.57	17493000000	116	13	16	16	17	16	16	13	16	16	17
sp|B2B4S6|CYNS_PODAN Cyanate hydratase OS=Podospora anserina (strain S / ATCC MYA-4624 / DSM 980 / FGSC 10383) OX=515849 GN=CYN1 PE=3 SV=1	B2B4S6	B2B4S6					0.501906	0.17778	0.774512	0.750117	-0.36864	-1.63313	-0.36864	-1.63313	9	9	9	32.3088	32.2253	32.1852	31.563	32.3039	31.7464						9	9	9	61.8	61.8	61.8	18.118	0	143.74	27326000000	147	9	9	9	9	9	8	9	9	9	9
tr|B2ASI3|B2ASI3_PODAN Podospora anserina S mat+ genomic DNA chromosome 1, supercontig 6 OS=Podospora anserina (strain S / ATCC MYA-4624 / DSM 980 / FGSC 10383) OX=515849 GN=PODANS_1_23590 PE=4 SV=1	B2ASI3	B2ASI3					0.500595	0.177801	0.79164	0.750066	-0.337083	-1.63303	-0.337083	-1.63303	1	1	1	26.211	26.082	26.1402	25.9795	26.0398	25.4028						1	1	1	2.9	2.9	2.9	34.463	0	16.221	402180000	10	1	1	1	1	1	1	1	1	1	1
tr|B2ANT5|B2ANT5_PODAN 1,3-beta-glucanosyltransferase OS=Podospora anserina (strain S / ATCC MYA-4624 / DSM 980 / FGSC 10383) OX=515849 GN=PODANS_6_9520 PE=3 SV=1;tr|B2B4K7|B2B4K7_PODAN 1,3-beta-glucanosyltransferase OS=Podospora anserina (strain S / ATCC	B2ANT5;B2B4K7	B2ANT5;B2B4K7					0.50369	0.179911	0.729674	0.744943	-0.454676	-1.623	-0.454676	-1.623	2;1	2;1	2;1	26.9544	26.1823	27.0759	26.2558	26.2955	26.2973						2	2	2	4.6	4.6	4.6	49.697	0	28.145	592620000	4	2	1	2	1	1	1	2	1	2	1
tr|B2AWZ1|B2AWZ1_PODAN 3-isopropylmalate dehydrogenase OS=Podospora anserina (strain S / ATCC MYA-4624 / DSM 980 / FGSC 10383) OX=515849 GN=PODANS_7_8770 PE=3 SV=1	B2AWZ1	B2AWZ1					0.502609	0.180994	0.881729	0.742336	-0.181593	-1.6179	-0.181593	-1.6179	11	11	11	31.3359	31.2186	30.9879	31.065	31.0229	30.9096						11	11	11	40.2	40.2	40.2	38.528	0	145.4	13784000000	94	9	11	9	10	10	10	9	11	9	10
tr|B2B159|B2B159_PODAN GrpE protein homolog OS=Podospora anserina (strain S / ATCC MYA-4624 / DSM 980 / FGSC 10383) OX=515849 GN=PODANS_3_9400 PE=3 SV=1	B2B159	B2B159					0.50141	0.184416	0.847794	0.734201	-0.238214	-1.60199	-0.238214	-1.60199	2	2	2	26.7407	26.8369	27.1625	26.8069	26.6761	26.5425						2	2	2	10.9	10.9	10.9	27.256	0	46.714	718330000	13	2	2	2	2	2	2	2	2	2	2
tr|B2ANA6|B2ANA6_PODAN Isocitrate lyase OS=Podospora anserina (strain S / ATCC MYA-4624 / DSM 980 / FGSC 10383) OX=515849 GN=PODANS_6_10010 PE=3 SV=1	B2ANA6	B2ANA6					0.503075	0.185505	0.708473	0.731645	-0.497216	-1.59699	-0.497216	-1.59699	3	3	3	28.3004	28.1555	28.1163	27.0861	27.929	28.0655						3	3	3	7.2	7.2	7.2	66.684	0	13.14	1599500000	14	3	2	3	3	3	3	3	2	3	3
tr|B2B1I7|B2B1I7_PODAN Podospora anserina S mat+ genomic DNA chromosome 3, supercontig 2 OS=Podospora anserina (strain S / ATCC MYA-4624 / DSM 980 / FGSC 10383) OX=515849 GN=PODANS_3_10250 PE=4 SV=1	B2B1I7	B2B1I7					0.500039	0.187018	0.3229	0.728117	-1.63084	-1.5901	-1.63084	-1.5901	3	3	3	25.8339	22.943	22.7574	22.146	21.8283	22.6675						3	3	3	4.4	4.4	4.4	123.16	0	12.918	89992000	3	2	1	2	1	1	1	2	1	2	1
tr|B2AXA4|B2AXA4_PODAN Podospora anserina S mat+ genomic DNA chromosome 7, supercontig 1 OS=Podospora anserina (strain S / ATCC MYA-4624 / DSM 980 / FGSC 10383) OX=515849 GN=PODANS_7_9870 PE=4 SV=1	B2AXA4	B2AXA4					0.500712	0.187346	0.708151	0.727355	-0.497871	-1.58861	-0.497871	-1.58861	6	6	6	28.8915	28.1041	28.7115	28.4471	28.0191	27.7473						6	6	6	14.3	14.3	14.3	64.906	0	49.284	2089400000	15	6	5	4	3	4	3	6	5	4	3
tr|B2AAV4|B2AAV4_PODAN Podospora anserina S mat+ genomic DNA chromosome 1, supercontig 1 OS=Podospora anserina (strain S / ATCC MYA-4624 / DSM 980 / FGSC 10383) OX=515849 GN=PODANS_1_5290 PE=4 SV=1	B2AAV4	B2AAV4					0.503437	0.189168	0.853169	0.723153	-0.229097	-1.5804	-0.229097	-1.5804	4	4	4	25.499	25.0375	25.4111	25.0961	25.028	25.1362						4	4	4	11.9	11.9	11.9	55.804	0	17.09	233430000	8	1	2	1	2	1	2	1	2	1	2
tr|B2AMS7|B2AMS7_PODAN Podospora anserina S mat+ genomic DNA chromosome 5, supercontig 5 OS=Podospora anserina (strain S / ATCC MYA-4624 / DSM 980 / FGSC 10383) OX=515849 GN=PODANS_5_5070 PE=4 SV=1	B2AMS7	B2AMS7					0.50614	0.190036	0.745527	0.721165	-0.423668	-1.57652	-0.423668	-1.57652	13	13	13	31.6005	30.7162	31.0312	30.5484	30.7495	30.779						13	13	13	40.4	40.4	40.4	56.612	0	226.98	12433000000	79	12	10	11	10	11	12	12	10	11	10
tr|B2B230|B2B230_PODAN Histone H3 OS=Podospora anserina (strain S / ATCC MYA-4624 / DSM 980 / FGSC 10383) OX=515849 GN=PODANS_6_5350 PE=3 SV=1	B2B230	B2B230					0.532	0.207785	0.873994	0.682385	-0.194305	-1.50087	-0.194305	-1.50087	3	3	3	31.2472	31.3068	31.2922	31.3289	30.8917	31.0426						3	3	3	16.9	16.9	16.9	15.392	0	7.9233	14736000000	54	3	3	3	3	3	3	3	3	3	3
tr|B2B5Z2|B2B5Z2_PODAN Podospora anserina S mat+ genomic DNA chromosome 2, supercontig 2 OS=Podospora anserina (strain S / ATCC MYA-4624 / DSM 980 / FGSC 10383) OX=515849 GN=PODANS_2_6240 PE=4 SV=1	B2B5Z2	B2B5Z2					0.531	0.207936	0.773575	0.68207	-0.370386	-1.50026	-0.370386	-1.50026	7	7	7	28.44	28.3393	28.2828	28.4571	27.8388	27.6551						7	7	7	14.7	14.7	14.7	57.298	0	36.074	1850300000	26	5	5	5	7	6	6	5	5	5	7
tr|B2A8Z2|B2A8Z2_PODAN Podospora anserina S mat+ genomic DNA chromosome 1, supercontig 1 OS=Podospora anserina (strain S / ATCC MYA-4624 / DSM 980 / FGSC 10383) OX=515849 GN=PODANS_1_7890 PE=3 SV=1	B2A8Z2	B2A8Z2					0.543662	0.218215	0.928828	0.661115	-0.106517	-1.45943	-0.106517	-1.45943	16	16	15	34.606	34.7856	34.7807	34.674	34.6454	34.5335						16	16	15	60	60	56.7	27.065	0	323.31	165940000000	246	15	15	16	16	15	15	15	15	16	16
tr|B2ART7|B2ART7_PODAN Podospora anserina S mat+ genomic DNA chromosome 4, supercontig 4 OS=Podospora anserina (strain S / ATCC MYA-4624 / DSM 980 / FGSC 10383) OX=515849 GN=PODANS_4_6420 PE=3 SV=1	B2ART7	B2ART7					0.54664	0.222125	0.612147	0.653402	-0.70805	-1.44441	-0.70805	-1.44441	12	11	11	31.9469	30.2768	31.2387	30.2906	30.5308	30.5168						12	11	11	23.7	22	22	72.333	0	142.33	12375000000	70	12	10	10	10	10	11	11	9	9	9
tr|B2APG7|B2APG7_PODAN Carbonic anhydrase OS=Podospora anserina (strain S / ATCC MYA-4624 / DSM 980 / FGSC 10383) OX=515849 GN=PODANS_5_10260 PE=3 SV=1	B2APG7	B2APG7					0.549813	0.223707	0.885572	0.650321	-0.175318	-1.43841	-0.175318	-1.43841	6	6	6	31.1172	31.12	31.0726	30.7405	31.154	30.8893						6	6	6	31.6	31.6	31.6	34.914	0	98.533	13094000000	44	6	6	5	5	6	6	6	6	5	5
tr|A0A090CI82|A0A090CI82_PODAN Putative hydroxyacylglutathione hydrolase, cytoplasmic isozyme OS=Podospora anserina (strain S / ATCC MYA-4624 / DSM 980 / FGSC 10383) OX=515849 PE=4 SV=1	A0A090CI82	A0A090CI82					0.550296	0.224126	0.857373	0.649509	-0.222005	-1.43683	-0.222005	-1.43683	7	7	7	29.0687	29.0201	28.9087	28.4861	28.9594	28.886						7	7	7	41.4	41.4	41.4	28.235	0	87.573	3005500000	30	6	5	6	6	6	6	6	5	6	6
tr|B2B0P3|B2B0P3_PODAN Plasma membrane ATPase OS=Podospora anserina (strain S / ATCC MYA-4624 / DSM 980 / FGSC 10383) OX=515849 GN=PODANS_3_6820 PE=3 SV=1	B2B0P3	B2B0P3					0.549801	0.224643	0.421022	0.648507	-1.24803	-1.43488	-1.24803	-1.43488	5	5	5	27.9438	26.196	24.9726	25.0781	24.9498	25.3404						5	5	5	9	9	9	99.807	0	33.355	478290000	10	4	4	4	4	2	2	4	4	4	4
tr|B2ASG4|B2ASG4_PODAN Podospora anserina S mat+ genomic DNA chromosome 1, supercontig 6 OS=Podospora anserina (strain S / ATCC MYA-4624 / DSM 980 / FGSC 10383) OX=515849 GN=PODANS_1_23410 PE=4 SV=1	B2ASG4	B2ASG4					0.555224	0.229442	0.806513	0.639326	-0.310231	-1.417	-0.310231	-1.417	11	11	11	31.0013	30.9662	31.1052	30.2885	30.9792	30.8743						11	11	11	41.9	41.9	41.9	38.213	0	169.07	11965000000	86	9	9	9	9	11	10	9	9	9	9
tr|A0A090C9I4|A0A090C9I4_PODAN Uncharacterized protein OS=Podospora anserina (strain S / ATCC MYA-4624 / DSM 980 / FGSC 10383) OX=515849 PE=4 SV=1	A0A090C9I4	A0A090C9I4					0.557011	0.23054	0.833595	0.637253	-0.262582	-1.41296	-0.262582	-1.41296	7	7	7	28.6116	28.0533	28.429	28.2752	28.0069	28.0241						7	7	7	18.2	18.2	18.2	68.113	0	25.826	1917600000	27	5	5	6	7	5	5	5	5	6	7
tr|B2AWC5|B2AWC5_PODAN Podospora anserina S mat+ genomic DNA chromosome 7, supercontig 1 OS=Podospora anserina (strain S / ATCC MYA-4624 / DSM 980 / FGSC 10383) OX=515849 GN=PODANS_7_6690 PE=4 SV=1	B2AWC5	B2AWC5					0.556288	0.230721	0.0406073	0.636913	-4.62212	-1.4123	-4.62212	-1.4123	4	4	4	26.2417	26.9465	26.9764	26.4129	24.186	15.6994						4	4	4	7.7	7.7	7.7	69.171	0	10.279	449150000	9	2	2	3	3	1	1	2	2	3	3
tr|A0A090CP65|A0A090CP65_PODAN ATP synthase subunit beta OS=Podospora anserina (strain S / ATCC MYA-4624 / DSM 980 / FGSC 10383) OX=515849 PE=3 SV=1	A0A090CP65	A0A090CP65					0.551364	0.231581	0.818859	0.635297	-0.288314	-1.40915	-0.288314	-1.40915	28	28	28	36.1105	35.4337	35.7774	35.4254	35.6069	35.4244						28	28	28	79.8	79.8	79.8	55.449	0	323.31	324610000000	437	27	27	27	26	27	24	27	27	27	26
tr|B2B5F1|B2B5F1_PODAN Superoxide dismutase OS=Podospora anserina (strain S / ATCC MYA-4624 / DSM 980 / FGSC 10383) OX=515849 GN=PODANS_2_4460 PE=3 SV=1	B2B5F1	B2B5F1					0.550405	0.231661	0.342796	0.635147	-1.54458	-1.40886	-1.54458	-1.40886	9	9	9	33.0096	33.4818	32.5415	30.7354	33.5593	30.1045						9	9	9	47.9	47.9	47.9	26.259	0	82.21	42494000000	70	9	9	9	9	9	8	9	9	9	9
sp|Q02655|CYB_PODAN Cytochrome b OS=Podospora anserina (strain S / ATCC MYA-4624 / DSM 980 / FGSC 10383) OX=515849 GN=COB PE=3 SV=1	Q02655	Q02655					0.550104	0.233424	0.807792	0.631855	-0.307944	-1.40245	-0.307944	-1.40245	2	2	2	25.2921	25.4349	25.7501	24.9345	25.1023	25.5165						2	2	2	4.9	4.9	4.9	43.531	0	2.9336	258960000	5	2	2	2	2	2	2	2	2	2	2
tr|B2ANL0|B2ANL0_PODAN Podospora anserina S mat+ genomic DNA chromosome 6, supercontig 4 OS=Podospora anserina (strain S / ATCC MYA-4624 / DSM 980 / FGSC 10383) OX=515849 GN=PODANS_6_10820 PE=4 SV=1	B2ANL0	B2ANL0					0.552289	0.235548	0.827719	0.627921	-0.272787	-1.39479	-0.272787	-1.39479	12	12	12	30.8929	30.9396	30.8953	30.4088	31.0245	30.4761						12	12	12	41.7	41.7	41.7	41.612	0	126.38	11173000000	77	12	12	11	11	11	11	12	12	11	11
tr|B2AE70|B2AE70_PODAN Isocitrate dehydrogenase [NADP] OS=Podospora anserina (strain S / ATCC MYA-4624 / DSM 980 / FGSC 10383) OX=515849 GN=PODANS_4_3040 PE=3 SV=1	B2AE70	B2AE70					0.557172	0.238494	0.865242	0.622522	-0.208824	-1.38427	-0.208824	-1.38427	28	28	28	33.3863	32.9798	32.9187	32.8172	32.9097	32.9314						28	28	28	56.4	56.4	56.4	51.538	0	323.31	51749000000	238	27	27	28	25	26	26	27	27	28	25
sp|B2AM55|NAO_PODAN Nitroalkane oxidase OS=Podospora anserina (strain S / ATCC MYA-4624 / DSM 980 / FGSC 10383) OX=515849 GN=Pa_5_6340 PE=1 SV=1	B2AM55;A0A090CAF4	B2AM55					0.558837	0.240647	0.845102	0.61862	-0.242803	-1.37667	-0.242803	-1.37667	11;2	11;2	11;2	31.3474	31.0506	30.9144	30.7612	31.1032	30.7196						11	11	11	30.9	30.9	30.9	45.481	0	141.26	12875000000	79	10	9	10	9	9	10	10	9	10	9
tr|A0A090CRA2|A0A090CRA2_PODAN Putative laccase OS=Podospora anserina (strain S / ATCC MYA-4624 / DSM 980 / FGSC 10383) OX=515849 PE=3 SV=1	A0A090CRA2	A0A090CRA2					0.562278	0.243647	0.658606	0.613239	-0.602512	-1.36619	-0.602512	-1.36619	7	7	7	30.1015	29.8962	29.9875	28.5186	29.8392	29.8199						7	7	7	10.4	10.4	10.4	86.829	0	81.67	5508500000	48	7	4	5	4	4	4	7	4	5	4
tr|A0A090CKI0|A0A090CKI0_PODAN Putative Phosphoglycerate dehydrogenase or related dehydrogenases OS=Podospora anserina (strain S / ATCC MYA-4624 / DSM 980 / FGSC 10383) OX=515849 PE=4 SV=1	A0A090CKI0	A0A090CKI0					0.564104	0.244962	0.870287	0.610901	-0.200437	-1.36163	-0.200437	-1.36163	10	10	10	29.6382	29.7463	29.8384	29.3658	29.807	29.4487						10	10	10	41.1	41.1	41.1	38.433	0	83.922	5060000000	49	7	8	10	8	9	8	7	8	10	8
tr|B2B2N8|B2B2N8_PODAN Podospora anserina S mat+ genomic DNA chromosome 6, supercontig 2 OS=Podospora anserina (strain S / ATCC MYA-4624 / DSM 980 / FGSC 10383) OX=515849 GN=PODANS_6_2570 PE=3 SV=1	B2B2N8	B2B2N8					0.563713	0.246042	0.702753	0.608992	-0.50891	-1.35791	-0.50891	-1.35791	16	16	16	32.832	32.0096	31.9772	32.1257	31.8808	31.2856						16	16	16	29.9	29.9	29.9	72.906	0	189.71	27455000000	119	15	14	15	15	15	15	15	14	15	15
tr|B2AB77|B2AB77_PODAN Podospora anserina S mat+ genomic DNA chromosome 1, supercontig 1 OS=Podospora anserina (strain S / ATCC MYA-4624 / DSM 980 / FGSC 10383) OX=515849 GN=PODANS_1_6390 PE=4 SV=1	B2AB77	B2AB77					0.575766	0.255458	0.79961	0.592681	-0.322632	-1.32611	-0.322632	-1.32611	9	9	9	33.5115	33.3217	33.6707	32.7441	33.3224	33.4695						9	9	9	62	62	62	21.878	0	180.14	66507000000	167	9	9	9	9	9	9	9	9	9	9
tr|B2AWB5|B2AWB5_PODAN Podospora anserina S mat+ genomic DNA chromosome 7, supercontig 1 OS=Podospora anserina (strain S / ATCC MYA-4624 / DSM 980 / FGSC 10383) OX=515849 GN=PODANS_7_6600 PE=4 SV=1	B2AWB5	B2AWB5					0.583499	0.260203	0.925203	0.584688	-0.112158	-1.31052	-0.112158	-1.31052	5	5	5	31.323	31.1526	31.2413	31.2014	31.1922	30.9869						5	5	5	32.8	32.8	32.8	28.236	0	144.28	14663000000	38	5	5	5	5	5	5	5	5	5	5
tr|B2AVW1|B2AVW1_PODAN Catalase OS=Podospora anserina (strain S / ATCC MYA-4624 / DSM 980 / FGSC 10383) OX=515849 GN=PODANS_7_1610 PE=3 SV=1	B2AVW1	B2AVW1					0.5849	0.261481	0.0825639	0.58256	-3.59835	-1.30636	-3.59835	-1.30636	2	2	2	25.3475	25.0677	23.7318	23.8045	23.848	15.6994						2	2	2	4.1	4.1	4.1	80.472	0	5.9922	121540000	2	2	1	1	1	1	0	2	1	1	1
tr|B2A947|B2A947_PODAN ATP synthase subunit alpha OS=Podospora anserina (strain S / ATCC MYA-4624 / DSM 980 / FGSC 10383) OX=515849 GN=PODANS_1_8390 PE=3 SV=1	B2A947	B2A947					0.584359	0.262488	0.837304	0.58089	-0.256177	-1.30311	-0.256177	-1.30311	30	30	30	35.6739	35.0447	35.423	35.1388	35.2415	34.9928						30	30	30	58.5	58.5	58.5	59.348	0	323.31	249860000000	374	30	27	29	26	28	28	30	27	29	26
tr|A0A090D6W7|A0A090D6W7_PODAN Putative lactoylglutathione lyase OS=Podospora anserina (strain S / ATCC MYA-4624 / DSM 980 / FGSC 10383) OX=515849 PE=4 SV=1	A0A090D6W7	A0A090D6W7					0.583863	0.263615	0.786947	0.57903	-0.345662	-1.29947	-0.345662	-1.29947	5	5	5	28.6878	28.457	28.4523	27.8159	28.6738	28.0705						5	5	5	26.8	26.8	26.8	35.721	0	37.313	2114500000	23	3	5	5	4	4	4	3	5	5	4
tr|B2ACZ7|B2ACZ7_PODAN Podospora anserina S mat+ genomic DNA chromosome 3, supercontig 3 OS=Podospora anserina (strain S / ATCC MYA-4624 / DSM 980 / FGSC 10383) OX=515849 GN=PODANS_3_10910 PE=4 SV=1	B2ACZ7	B2ACZ7					0.583461	0.263789	0.722524	0.578744	-0.468883	-1.29892	-0.468883	-1.29892	15	15	15	31.3164	30.5838	30.9379	31.0294	30.3682	30.0338						15	15	15	33.8	33.8	33.8	58.564	0	96.157	11017000000	51	14	10	12	12	12	11	14	10	12	12
tr|B2AM48|B2AM48_PODAN Podospora anserina S mat+ genomic DNA chromosome 1, supercontig 3 OS=Podospora anserina (strain S / ATCC MYA-4624 / DSM 980 / FGSC 10383) OX=515849 GN=PODANS_1_14250 PE=3 SV=1	B2AM48	B2AM48					0.583	0.264102	0.744556	0.578228	-0.425549	-1.29791	-0.425549	-1.29791	19	19	19	32.707	31.9799	32.1576	32.3101	31.7841	31.4736						19	19	19	40.8	40.8	40.8	59.857	0	268.44	28045000000	150	19	19	19	18	17	16	19	19	19	18
tr|B2AZ71|B2AZ71_PODAN Proteasome subunit alpha type OS=Podospora anserina (strain S / ATCC MYA-4624 / DSM 980 / FGSC 10383) OX=515849 GN=PODANS_3_4340 PE=3 SV=1	B2AZ71	B2AZ71					0.582958	0.26534	0.893611	0.576198	-0.16228	-1.29395	-0.16228	-1.29395	10	10	10	32.4428	32.0409	32.138	32.0784	32.0769	31.9796						10	10	10	53.9	53.9	53.9	26.952	0	229.11	28306000000	143	10	10	10	10	10	9	10	10	10	10
tr|B2B786|B2B786_PODAN Podospora anserina S mat+ genomic DNA chromosome 2, supercontig 2 OS=Podospora anserina (strain S / ATCC MYA-4624 / DSM 980 / FGSC 10383) OX=515849 GN=PODANS_2_10250 PE=3 SV=1	B2B786	B2B786					0.58354	0.265789	0.86564	0.575463	-0.20816	-1.29251	-0.20816	-1.29251	15	15	15	33.282	32.9706	32.8146	32.9698	32.7918	32.6812						15	15	15	56.8	56.8	56.8	33.182	0	231.81	49310000000	180	15	15	14	15	14	15	15	15	14	15
tr|B2B1Z6|B2B1Z6_PODAN Podospora anserina S mat+ genomic DNA chromosome 6, supercontig 2 OS=Podospora anserina (strain S / ATCC MYA-4624 / DSM 980 / FGSC 10383) OX=515849 GN=PODANS_6_4990 PE=3 SV=1	B2B1Z6	B2B1Z6					0.583155	0.267512	0.905044	0.572657	-0.14394	-1.28703	-0.14394	-1.28703	29	29	28	35.574	35.2026	35.3067	35.1842	35.2355	35.2318						29	29	28	73.1	73.1	71.7	53.992	0	323.31	254070000000	398	27	24	27	27	28	27	27	24	27	27
tr|B2AFJ8|B2AFJ8_PODAN Podospora anserina S mat+ genomic DNA chromosome 5, supercontig 7 OS=Podospora anserina (strain S / ATCC MYA-4624 / DSM 980 / FGSC 10383) OX=515849 GN=PODANS_5_11820 PE=4 SV=1	B2AFJ8	B2AFJ8					0.602691	0.276566	0.655671	0.558201	-0.608957	-1.25878	-0.608957	-1.25878	31	31	31	35.5166	35.0723	35.6781	33.9189	35.2005	35.3207						31	31	31	65.1	65.1	65.1	45.827	0	323.31	240010000000	432	30	28	28	26	29	29	30	28	28	26
tr|A0A090CPS7|A0A090CPS7_PODAN Putative Fimbrin OS=Podospora anserina (strain S / ATCC MYA-4624 / DSM 980 / FGSC 10383) OX=515849 PE=4 SV=1	A0A090CPS7	A0A090CPS7					0.608886	0.280324	0.844921	0.55234	-0.243112	-1.24732	-0.243112	-1.24732	4	4	4	26.1147	26.0462	25.934	26.0486	25.8929	25.4242						4	4	4	8.4	8.4	8.4	68.764	0	5.1853	382810000	8	2	2	3	2	3	3	2	2	3	2
tr|B2AV47|B2AV47_PODAN Podospora anserina S mat+ genomic DNA chromosome 7, supercontig 1 OS=Podospora anserina (strain S / ATCC MYA-4624 / DSM 980 / FGSC 10383) OX=515849 GN=PODANS_7_4110 PE=4 SV=1	B2AV47	B2AV47					0.610552	0.281125	0.128039	0.551101	-2.96534	-1.24489	-2.96534	-1.24489	1	1	1	24.2826	22.803	22.8926	15.6994	22.4973	22.8855						1	1	1	4.8	4.8	4.8	35.995	0	3.5429	49181000	1	1	1	1	0	1	1	1	1	1	0
tr|B2A989|B2A989_PODAN Podospora anserina S mat+ genomic DNA chromosome 1, supercontig 1 OS=Podospora anserina (strain S / ATCC MYA-4624 / DSM 980 / FGSC 10383) OX=515849 GN=PODANS_1_1290 PE=4 SV=1	B2A989	B2A989					0.609438	0.281132	0.635813	0.551089	-0.653326	-1.24487	-0.653326	-1.24487	3	3	3	27.6122	27.8489	27.5828	26.0803	27.8644	27.1392						3	3	3	17.6	17.6	17.6	27.965	0	24.156	1111000000	11	3	3	3	3	3	2	3	3	3	3
tr|B2B448|B2B448_PODAN Podospora anserina S mat+ genomic DNA chromosome 2, supercontig 2 OS=Podospora anserina (strain S / ATCC MYA-4624 / DSM 980 / FGSC 10383) OX=515849 GN=PODANS_2_40 PE=4 SV=1	B2B448	B2B448					0.614703	0.283248	0.611817	0.547833	-0.708827	-1.23849	-0.708827	-1.23849	3	3	3	27.2809	26.9909	27.1984	25.3171	27.0501	26.9765						3	3	3	13.2	13.2	13.2	30.127	0	42.657	763260000	10	2	2	2	2	3	3	2	2	2	2
tr|B2AN72|B2AN72_PODAN Glucose-6-phosphate isomerase OS=Podospora anserina (strain S / ATCC MYA-4624 / DSM 980 / FGSC 10383) OX=515849 GN=PODANS_6_9140 PE=3 SV=1	B2AN72	B2AN72					0.621729	0.288116	0.788808	0.540432	-0.342253	-1.224	-0.342253	-1.224	15	15	15	32.982	32.1149	32.3905	32.2613	32.2717	31.9277						15	15	15	36.6	36.6	36.6	60.796	0	323.31	33182000000	112	15	14	13	14	14	11	15	14	13	14
tr|A0A090CLR0|A0A090CLR0_PODAN Putative Glutathione transferase omega OS=Podospora anserina (strain S / ATCC MYA-4624 / DSM 980 / FGSC 10383) OX=515849 PE=4 SV=1	A0A090CLR0	A0A090CLR0					0.625276	0.290078	0.809401	0.537485	-0.305073	-1.21823	-0.305073	-1.21823	8	8	8	29.1127	28.707	28.5568	28.1138	28.7043	28.6431						8	8	8	25.1	25.1	25.1	46.247	0	31.818	2560600000	41	8	8	7	6	8	8	8	8	7	6
tr|B2B0Y0|B2B0Y0_PODAN Podospora anserina S mat+ genomic DNA chromosome 3, supercontig 2 OS=Podospora anserina (strain S / ATCC MYA-4624 / DSM 980 / FGSC 10383) OX=515849 GN=PODANS_3_7690 PE=4 SV=1	B2B0Y0	B2B0Y0					0.625958	0.29534	0.887955	0.529678	-0.171442	-1.20291	-0.171442	-1.20291	8	8	7	30.1803	30.4404	30.6281	30.2523	30.3428	30.1394						8	8	7	39.9	39.9	34.5	22.518	0	28.676	8156500000	65	6	6	6	8	6	6	6	6	6	8
tr|B2VL97|B2VL97_PODAN Histone H2A OS=Podospora anserina (strain S / ATCC MYA-4624 / DSM 980 / FGSC 10383) OX=515849 GN=PODANS_5_5390 PE=3 SV=1	B2VL97	B2VL97					0.626393	0.297169	0.918223	0.526997	-0.123083	-1.19765	-0.123083	-1.19765	3	3	2	29.4248	29.5069	29.3626	29.2519	29.4917	29.1815						3	3	2	28.9	28.9	23.7	14.251	0	12.595	4176900000	25	2	3	2	2	2	2	2	3	2	2
tr|B2AQK3|B2AQK3_PODAN Podospora anserina S mat+ genomic DNA chromosome 4, supercontig 4 OS=Podospora anserina (strain S / ATCC MYA-4624 / DSM 980 / FGSC 10383) OX=515849 GN=PODANS_4_3880 PE=4 SV=1	B2AQK3	B2AQK3					0.625919	0.297381	0.906945	0.526687	-0.140913	-1.19704	-0.140913	-1.19704	14	14	14	32.0175	32.1307	32.1141	31.8201	32.1705	31.8489						14	14	14	70.8	70.8	70.8	29.307	0	323.31	26194000000	164	13	13	14	14	14	13	13	13	14	14
tr|B2ABD8|B2ABD8_PODAN Podospora anserina S mat+ genomic DNA chromosome 1, supercontig 1 OS=Podospora anserina (strain S / ATCC MYA-4624 / DSM 980 / FGSC 10383) OX=515849 GN=PODANS_1_6980 PE=4 SV=1	B2ABD8	B2ABD8					0.628635	0.29879	0.897072	0.524634	-0.156705	-1.19301	-0.156705	-1.19301	9	9	9	29.7298	29.7235	30.0882	29.6067	29.7864	29.6782						9	9	9	46.1	46.1	46.1	33.421	0	120.35	5520700000	64	9	9	9	9	8	8	9	9	9	9
tr|B2ACB8|B2ACB8_PODAN Podospora anserina S mat+ genomic DNA chromosome 3, supercontig 1 OS=Podospora anserina (strain S / ATCC MYA-4624 / DSM 980 / FGSC 10383) OX=515849 GN=PODANS_3_540 PE=3 SV=1	B2ACB8	B2ACB8					0.652104	0.308701	0.915903	0.510462	-0.126733	-1.16516	-0.126733	-1.16516	4	4	4	29.4589	29.4529	29.4422	29.1643	29.5319	29.2776						4	4	4	16.4	16.4	16.4	43.733	0	67.411	4230900000	21	4	4	4	4	4	4	4	4	4	4
tr|B2B483|B2B483_PODAN Podospora anserina S mat+ genomic DNA chromosome 2, supercontig 2 OS=Podospora anserina (strain S / ATCC MYA-4624 / DSM 980 / FGSC 10383) OX=515849 GN=PODANS_2_390 PE=4 SV=1	B2B483	B2B483					0.657842	0.312747	0.0908898	0.504807	-3.45974	-1.15402	-3.45974	-1.15402	2	2	2	24.5923	25.4089	25.3751	24.878	15.6994	24.4198						2	2	2	17.4	17.4	17.4	25.377	0	2.7056	166640000	3	1	2	1	1	0	1	1	2	1	1
tr|B2AD09|B2AD09_PODAN Podospora anserina S mat+ genomic DNA chromosome 3, supercontig 3 OS=Podospora anserina (strain S / ATCC MYA-4624 / DSM 980 / FGSC 10383) OX=515849 GN=PODANS_3_10790 PE=4 SV=1	B2AD09	B2AD09					0.659726	0.313251	0.764001	0.504107	-0.388354	-1.15265	-0.388354	-1.15265	21	21	21	34.18	34.1755	34.0451	33.9619	34.1841	33.0896						21	21	21	59.8	59.8	59.8	42.812	0	323.31	103000000000	276	20	20	20	19	20	18	20	20	20	19
tr|B2AT73|B2AT73_PODAN Podospora anserina S mat+ genomic DNA chromosome 1, supercontig 4 OS=Podospora anserina (strain S / ATCC MYA-4624 / DSM 980 / FGSC 10383) OX=515849 GN=PODANS_1_14890 PE=4 SV=1	B2AT73	B2AT73					0.664409	0.315538	0.111234	0.500949	-3.16833	-1.14642	-3.16833	-1.14642	1	1	1	24.6158	24.1388	24.3986	23.7976	24.1512	15.6994						1	1	1	2.4	2.4	2.4	63.709	0	3.7395	99508000	1	1	1	1	1	1	0	1	1	1	1
tr|B2ADE8|B2ADE8_PODAN Podospora anserina S mat+ genomic DNA chromosome 4, supercontig 1 OS=Podospora anserina (strain S / ATCC MYA-4624 / DSM 980 / FGSC 10383) OX=515849 GN=PODANS_4_910 PE=4 SV=1	B2ADE8	B2ADE8					0.679189	0.323017	0.0457179	0.490775	-4.4511	-1.12635	-4.4511	-1.12635	1	1	1	28.2644	27.642	28.2087	15.6994	27.7903	27.2721						1	1	1	3.5	3.5	3.5	42.048	0	4.7595	1236300000	7	1	1	1	0	1	1	1	1	1	0
tr|B2AVQ4|B2AVQ4_PODAN Podospora anserina S mat+ genomic DNA chromosome 7, supercontig 1 OS=Podospora anserina (strain S / ATCC MYA-4624 / DSM 980 / FGSC 10383) OX=515849 GN=PODANS_7_2150 PE=3 SV=1	B2AVQ4	B2AVQ4					0.678285	0.325116	0.899883	0.487961	-0.152191	-1.1208	-0.152191	-1.1208	7	7	7	29.9967	29.973	30.214	29.7287	29.8839	30.1145						7	7	7	50.3	50.3	50.3	21.467	0	47.15	6542100000	66	6	6	6	7	6	6	6	6	6	7
tr|B2AT86|B2AT86_PODAN Podospora anserina S mat+ genomic DNA chromosome 1, supercontig 4 OS=Podospora anserina (strain S / ATCC MYA-4624 / DSM 980 / FGSC 10383) OX=515849 GN=PODANS_1_15020 PE=4 SV=1	B2AT86	B2AT86					0.683187	0.328235	0.11508	0.483815	-3.1193	-1.1126	-3.1193	-1.1126	1	1	1	24.1027	24.6712	24.4721	24.1697	24.019	15.6994						1	1	1	2.5	2.5	2.5	39.251	0.0014804	2.5374	103870000	6	1	1	1	1	1	0	1	1	1	1
tr|B2B1Q5|B2B1Q5_PODAN Podospora anserina S mat+ genomic DNA chromosome 6, supercontig 2 OS=Podospora anserina (strain S / ATCC MYA-4624 / DSM 980 / FGSC 10383) OX=515849 GN=PODANS_6_4100 PE=3 SV=1	B2B1Q5	B2B1Q5					0.689282	0.330078	0.814905	0.481383	-0.295296	-1.10779	-0.295296	-1.10779	32	32	31	34.6013	33.7142	34.116	33.9272	33.9149	33.7034						32	32	31	56.7	56.7	55	70.678	0	323.31	105340000000	410	31	31	31	30	29	30	31	31	31	30
tr|B2AF50|B2AF50_PODAN Podospora anserina S mat+ genomic DNA chromosome 5, supercontig 1 OS=Podospora anserina (strain S / ATCC MYA-4624 / DSM 980 / FGSC 10383) OX=515849 GN=PODANS_5_520 PE=3 SV=1	B2AF50	B2AF50					0.691761	0.331674	0.783126	0.479289	-0.352684	-1.10365	-0.352684	-1.10365	27	27	27	35.2128	34.4556	34.8176	34.9387	34.2926	34.1967						27	27	27	57.8	57.8	57.8	61.521	0	323.31	167850000000	327	25	24	27	26	25	23	25	24	27	26
tr|B2A8X8|B2A8X8_PODAN Podospora anserina S mat+ genomic DNA chromosome 1, supercontig 1 OS=Podospora anserina (strain S / ATCC MYA-4624 / DSM 980 / FGSC 10383) OX=515849 GN=PODANS_1_7750 PE=4 SV=1	B2A8X8	B2A8X8					0.690248	0.332087	0.0900276	0.478748	-3.47349	-1.10258	-3.47349	-1.10258	2	2	2	26.5505	24.1217	25.241	24.5809	15.6994	25.2124						2	2	2	4.3	4.3	4.3	77.771	0	8.5562	220170000	2	2	1	1	1	0	2	2	1	1	1
tr|B2B4R5|B2B4R5_PODAN S-(hydroxymethyl)glutathione dehydrogenase OS=Podospora anserina (strain S / ATCC MYA-4624 / DSM 980 / FGSC 10383) OX=515849 GN=PODANS_2_2190 PE=3 SV=1	B2B4R5	B2B4R5					0.690673	0.33245	0.822194	0.478273	-0.28245	-1.10164	-0.28245	-1.10164	13	13	13	32.1492	32.283	32.1247	31.4216	32.2704	32.0175						13	13	13	47	47	47	40.414	0	300.03	27075000000	135	11	12	12	11	12	11	11	12	12	11
tr|B2AYW5|B2AYW5_PODAN Podospora anserina S mat+ genomic DNA chromosome 1, supercontig 2 OS=Podospora anserina (strain S / ATCC MYA-4624 / DSM 980 / FGSC 10383) OX=515849 GN=PODANS_1_12470 PE=4 SV=1	B2AYW5	B2AYW5					0.689987	0.334618	0.78965	0.475451	-0.340715	-1.09605	-0.340715	-1.09605	5	5	5	31.6446	31.4064	31.0041	30.5559	31.411	31.0661						5	5	5	33.7	33.7	33.7	22.353	0	29.533	15039000000	24	4	4	5	4	4	4	4	4	5	4
tr|A0A090CN33|A0A090CN33_PODAN Putative PAB1-binding protein OS=Podospora anserina (strain S / ATCC MYA-4624 / DSM 980 / FGSC 10383) OX=515849 PE=4 SV=1	A0A090CN33	A0A090CN33					0.693743	0.337142	0.618777	0.472187	-0.692509	-1.08958	-0.692509	-1.08958	2	2	2	26.5569	25.4032	26.6136	26.1951	24.5327	25.7684						2	2	2	3.1	3.1	3.1	112.92	0	227.9	404020000	8	2	2	2	2	1	2	2	2	2	2
tr|A0A090CWL5|A0A090CWL5_PODAN Putative S-(Hydroxymethyl)glutathione dehydrogenase OS=Podospora anserina (strain S / ATCC MYA-4624 / DSM 980 / FGSC 10383) OX=515849 PE=3 SV=1	A0A090CWL5	A0A090CWL5					0.6935	0.33754	0.792451	0.471675	-0.335607	-1.08856	-0.335607	-1.08856	9	9	9	30.094	30.0912	30.0105	29.1162	30.0096	30.063						9	9	9	34.5	34.5	34.5	38.583	0	75.925	6280800000	81	9	8	8	8	8	8	9	8	8	8
tr|B2AAF6|B2AAF6_PODAN Podospora anserina S mat+ genomic DNA chromosome 1, supercontig 1 OS=Podospora anserina (strain S / ATCC MYA-4624 / DSM 980 / FGSC 10383) OX=515849 GN=PODANS_1_3840 PE=4 SV=1	B2AAF6	B2AAF6					0.691948	0.338154	0.610443	0.470885	-0.712072	-1.087	-0.712072	-1.087	10	10	10	30.7146	30.6487	30.4329	28.616	30.756	30.288						10	10	10	36.8	36.8	36.8	36.295	0	94.258	8430600000	65	9	10	10	5	10	8	9	10	10	5
tr|A0A090D664|A0A090D664_PODAN Uncharacterized protein OS=Podospora anserina (strain S / ATCC MYA-4624 / DSM 980 / FGSC 10383) OX=515849 PE=4 SV=1	A0A090D664	A0A090D664					0.689846	0.338504	0.0457094	0.470437	-4.45136	-1.08611	-4.45136	-1.08611	5	5	5	28.1672	28.6491	27.5983	26.1755	29.1857	15.6994						5	5	5	36.9	36.9	36.9	29.775	0	46.521	1612000000	18	4	5	3	2	5	0	4	5	3	2
tr|A0A090CPN0|A0A090CPN0_PODAN Uncharacterized protein OS=Podospora anserina (strain S / ATCC MYA-4624 / DSM 980 / FGSC 10383) OX=515849 PE=4 SV=1	A0A090CPN0	A0A090CPN0					0.691307	0.339737	0.724179	0.468857	-0.465583	-1.08298	-0.465583	-1.08298	3	3	3	26.5023	26.0677	26.2606	24.9898	26.1905	26.2535						3	3	3	15.2	15.2	15.2	22.547	0	3.8168	435680000	6	1	2	2	2	2	2	1	2	2	2
tr|B2AQN7|B2AQN7_PODAN Podospora anserina S mat+ genomic DNA chromosome 4, supercontig 4 OS=Podospora anserina (strain S / ATCC MYA-4624 / DSM 980 / FGSC 10383) OX=515849 GN=PODANS_4_3610 PE=3 SV=1	B2AQN7	B2AQN7					0.692199	0.340443	0.83861	0.467955	-0.253929	-1.08119	-0.253929	-1.08119	5	5	5	27.7635	27.7727	28.0897	27.2045	27.8042	27.8554						5	5	5	14	14	14	44.449	0	16.666	1374700000	25	5	5	5	4	5	4	5	5	5	4
tr|B2AC27|B2AC27_PODAN Podospora anserina S mat+ genomic DNA chromosome 2, supercontig 3 OS=Podospora anserina (strain S / ATCC MYA-4624 / DSM 980 / FGSC 10383) OX=515849 GN=PODANS_2_14220 PE=4 SV=1	B2AC27	B2AC27					0.697091	0.343643	0.73916	0.463893	-0.436041	-1.07312	-0.436041	-1.07312	5	5	5	26.3101	25.8741	26.224	26.2148	25.9358	24.9494						5	5	5	19.3	19.3	19.3	22.773	0	9.5664	397550000	8	4	5	5	5	4	2	4	5	5	5
tr|B2ACP6|B2ACP6_PODAN Podospora anserina S mat+ genomic DNA chromosome 3, supercontig 1 OS=Podospora anserina (strain S / ATCC MYA-4624 / DSM 980 / FGSC 10383) OX=515849 GN=PODANS_3_1660 PE=4 SV=1	B2ACP6	B2ACP6					0.70651	0.351563	0.0756882	0.453997	-3.72379	-1.05345	-3.72379	-1.05345	3	3	3	26.9885	26.0503	26.3729	26.1735	15.6994	26.3674						3	3	3	13.2	13.2	13.2	33.09	0	6.5127	500520000	2	2	2	2	2	2	2	2	2	2	2
tr|B2AQI2|B2AQI2_PODAN Podospora anserina S mat+ genomic DNA chromosome 4, supercontig 4 OS=Podospora anserina (strain S / ATCC MYA-4624 / DSM 980 / FGSC 10383) OX=515849 GN=PODANS_4_4050 PE=4 SV=1	B2AQI2	B2AQI2					0.708372	0.354404	0.925343	0.450501	-0.111939	-1.04649	-0.111939	-1.04649	2	2	2	26.3462	26.2215	26.1329	25.95	26.1797	26.2351						2	2	2	6.5	6.5	6.5	41.546	0	3.3954	456960000	6	2	1	2	1	2	2	2	1	2	1
tr|B2ALL1|B2ALL1_PODAN Pyruvate kinase OS=Podospora anserina (strain S / ATCC MYA-4624 / DSM 980 / FGSC 10383) OX=515849 GN=PODANS_5_3960 PE=3 SV=1	B2ALL1	B2ALL1					0.707808	0.354475	0.838228	0.450414	-0.254585	-1.04631	-0.254585	-1.04631	25	25	25	33.0334	32.3388	32.6765	32.6656	32.4311	32.1882						25	25	25	55.3	55.3	55.3	57.758	0	323.31	39166000000	186	24	24	24	24	21	21	24	24	24	24
tr|B2ANA8|B2ANA8_PODAN Podospora anserina S mat+ genomic DNA chromosome 6, supercontig 4 OS=Podospora anserina (strain S / ATCC MYA-4624 / DSM 980 / FGSC 10383) OX=515849 GN=PODANS_6_10030 PE=3 SV=1	B2ANA8	B2ANA8					0.708351	0.35581	0.875943	0.448782	-0.191092	-1.04306	-0.191092	-1.04306	2	2	2	27.4875	26.908	27.2764	26.9205	27.0168	27.1613						2	2	2	5.5	5.5	5.5	54.322	0	20.579	889570000	10	2	2	1	2	2	2	2	2	1	2
tr|B2AN14|B2AN14_PODAN Podospora anserina S mat+ genomic DNA chromosome 6, supercontig 4 OS=Podospora anserina (strain S / ATCC MYA-4624 / DSM 980 / FGSC 10383) OX=515849 GN=PODANS_6_8660 PE=4 SV=1	B2AN14	B2AN14					0.712233	0.357923	0.764289	0.446211	-0.38781	-1.03793	-0.38781	-1.03793	5	5	5	30.1079	29.7011	30.0753	28.9309	29.6543	30.1357						5	5	5	35.3	35.3	35.3	22.416	0	99.843	5697600000	44	5	3	4	3	4	5	5	3	4	3
tr|A0A090CBX6|A0A090CBX6_PODAN Uncharacterized protein OS=Podospora anserina (strain S / ATCC MYA-4624 / DSM 980 / FGSC 10383) OX=515849 PE=4 SV=1	A0A090CBX6	A0A090CBX6					0.711395	0.358887	0.709306	0.445042	-0.49552	-1.0356	-0.49552	-1.0356	1	1	1	24.2842	24.2787	23.5092	23.9413	22.7219	23.9223						1	1	1	6.2	6.2	6.2	29.7	0	10.592	91647000	3	1	1	1	1	1	1	1	1	1	1
tr|B2ADP4|B2ADP4_PODAN Podospora anserina S mat+ genomic DNA chromosome 4, supercontig 1 OS=Podospora anserina (strain S / ATCC MYA-4624 / DSM 980 / FGSC 10383) OX=515849 GN=PODANS_4_1650 PE=4 SV=1	B2ADP4	B2ADP4					0.712463	0.359744	0.0846426	0.444007	-3.56247	-1.03354	-3.56247	-1.03354	1	1	1	26.1792	26.0925	26.1912	15.6994	26.1422	25.9339						1	1	1	5.7	5.7	5.7	28.182	0	2.7206	362320000	3	1	1	1	1	1	1	1	1	1	1
tr|B2B7U8|B2B7U8_PODAN Clathrin light chain OS=Podospora anserina (strain S / ATCC MYA-4624 / DSM 980 / FGSC 10383) OX=515849 GN=PODANS_2_12320 PE=3 SV=1	B2B7U8	B2B7U8					0.712596	0.360283	0.830227	0.443356	-0.268423	-1.03224	-0.268423	-1.03224	1	1	1	23.9124	23.5845	24.1483	23.9746	23.5902	23.2751						1	1	1	5	5	5	26.056	0	4.7026	86224000	4	1	1	1	1	1	1	1	1	1	1
tr|B2B555|B2B555_PODAN Podospora anserina S mat+ genomic DNA chromosome 2, supercontig 2 OS=Podospora anserina (strain S / ATCC MYA-4624 / DSM 980 / FGSC 10383) OX=515849 GN=PODANS_2_3550 PE=4 SV=1	B2B555	B2B555					0.715005	0.361817	0.836072	0.441511	-0.258301	-1.02855	-0.258301	-1.02855	14	14	14	31.6894	30.9254	31.083	30.7997	31.122	31.0012						14	14	14	40.2	40.2	40.2	48.113	0	118.79	14154000000	117	13	14	11	10	11	11	13	14	11	10
tr|B2AN60|B2AN60_PODAN Podospora anserina S mat+ genomic DNA chromosome 6, supercontig 4 OS=Podospora anserina (strain S / ATCC MYA-4624 / DSM 980 / FGSC 10383) OX=515849 GN=PODANS_6_9070 PE=3 SV=1	B2AN60	B2AN60					0.718441	0.364146	0.108362	0.438724	-3.20607	-1.02298	-3.20607	-1.02298	1	1	1	25.4699	24.6082	25.3715	15.6994	25.0661	25.0658						1	1	1	8.6	8.6	8.6	19.409	0	10.281	185700000	6	1	1	1	0	1	1	1	1	1	0
tr|A0A090C987|A0A090C987_PODAN Putative mitochondrial histidyl-tRNA synthetase OS=Podospora anserina (strain S / ATCC MYA-4624 / DSM 980 / FGSC 10383) OX=515849 PE=3 SV=1	A0A090C987	A0A090C987					0.720758	0.366178	0.83604	0.436308	-0.258357	-1.01815	-0.258357	-1.01815	6	6	6	29.2745	28.5585	29.048	28.9155	28.7535	28.4369						6	6	6	12.8	12.8	12.8	66.289	0	110.91	2922000000	35	5	6	6	6	5	5	5	6	6	6
tr|B2B7R5|B2B7R5_PODAN Podospora anserina S mat+ genomic DNA chromosome 2, supercontig 2 OS=Podospora anserina (strain S / ATCC MYA-4624 / DSM 980 / FGSC 10383) OX=515849 GN=PODANS_2_11990 PE=3 SV=1	B2B7R5	B2B7R5					0.720348	0.366403	0.869836	0.436041	-0.201185	-1.01762	-0.201185	-1.01762	13	13	13	31.6725	31.644	31.8468	31.1602	31.6094	31.7901						13	13	13	45.6	45.6	45.6	39.569	0	323.31	20030000000	126	9	10	11	9	11	8	9	10	11	9
tr|B2B7D4|B2B7D4_PODAN Podospora anserina S mat+ genomic DNA chromosome 2, supercontig 2 OS=Podospora anserina (strain S / ATCC MYA-4624 / DSM 980 / FGSC 10383) OX=515849 GN=PODANS_2_10730 PE=3 SV=1	B2B7D4	B2B7D4					0.728262	0.3722	0.833517	0.429224	-0.262716	-1.00397	-0.262716	-1.00397	7	7	7	28.0644	27.3885	27.9362	27.8459	27.4363	27.3188						7	7	7	19.1	19.1	19.1	54.391	0	47.482	1303500000	14	6	6	7	7	7	6	6	6	7	7
tr|B2B3T5|B2B3T5_PODAN Podospora anserina S mat+ genomic DNA chromosome 6, supercontig 2 OS=Podospora anserina (strain S / ATCC MYA-4624 / DSM 980 / FGSC 10383) OX=515849 GN=PODANS_6_7220 PE=4 SV=1	B2B3T5	B2B3T5					0.728006	0.372706	0.27684	0.428633	-1.85288	-1.00279	-1.85288	-1.00279	4	4	4	28.2777	28.1224	27.3329	22.4317	28.2208	27.5219						4	4	4	29.4	29.4	29.4	21.865	0	12.209	1297900000	13	2	3	3	3	3	4	2	3	3	3
tr|B2AVL1|B2AVL1_PODAN Podospora anserina S mat+ genomic DNA chromosome 7, supercontig 1 OS=Podospora anserina (strain S / ATCC MYA-4624 / DSM 980 / FGSC 10383) OX=515849 GN=PODANS_7_2570 PE=4 SV=1	B2AVL1	B2AVL1					0.738755	0.378164	0.791068	0.422319	-0.338127	-0.990118	-0.338127	-0.990118	1	1	1	22.586	23.6821	23.1498	22.6418	22.7065	23.0552						1	1	1	11.8	11.8	11.8	17.61	0	21.441	51166000	1	1	1	1	1	1	1	1	1	1	1
tr|B2ABF2|B2ABF2_PODAN Podospora anserina S mat+ genomic DNA chromosome 1, supercontig 5 OS=Podospora anserina (strain S / ATCC MYA-4624 / DSM 980 / FGSC 10383) OX=515849 GN=PODANS_1_20890 PE=4 SV=1	B2ABF2	B2ABF2					0.738268	0.378383	0.074701	0.422068	-3.74273	-0.989614	-3.74273	-0.989614	1	1	1	26.7621	27.067	27.167	15.6994	27.2343	26.8342						1	1	1	3.7	3.7	3.7	27.263	0	3.8137	682630000	5	1	1	1	0	1	1	1	1	1	0
tr|A0A090CKF1|A0A090CKF1_PODAN Uncharacterized protein OS=Podospora anserina (strain S / ATCC MYA-4624 / DSM 980 / FGSC 10383) OX=515849 PE=4 SV=1	A0A090CKF1	A0A090CKF1					0.743025	0.383218	0.809499	0.416554	-0.304899	-0.978529	-0.304899	-0.978529	1	1	1	26.9576	26.1034	26.3011	25.8962	26.0675	26.4837						1	1	1	2.5	2.5	2.5	49.739	0.0014793	2.5309	511720000	5	1	1	1	1	1	1	1	1	1	1
tr|B2AN56|B2AN56_PODAN Podospora anserina S mat+ genomic DNA chromosome 6, supercontig 4 OS=Podospora anserina (strain S / ATCC MYA-4624 / DSM 980 / FGSC 10383) OX=515849 GN=PODANS_6_9040 PE=4 SV=1	B2AN56	B2AN56					0.747959	0.385781	0.14308	0.413659	-2.8051	-0.972702	-2.8051	-0.972702	1	1	1	24.1283	24.3277	24.3545	24.305	15.6994	24.3908						1	1	1	6.9	6.9	6.9	27.929	0	3.0829	103570000	1	1	1	1	1	0	1	1	1	1	1
tr|B2AAN9|B2AAN9_PODAN Proteasome subunit alpha type OS=Podospora anserina (strain S / ATCC MYA-4624 / DSM 980 / FGSC 10383) OX=515849 GN=PODANS_1_4670 PE=3 SV=1	B2AAN9	B2AAN9					0.749208	0.386773	0.962899	0.412544	-0.0545432	-0.970456	-0.0545432	-0.970456	6	6	6	30.9683	30.8689	30.8788	30.7767	30.9364	30.8393						6	6	6	25.6	25.6	25.6	32.014	0	94.15	11852000000	33	6	6	6	6	6	6	6	6	6	6
tr|B2B022|B2B022_PODAN Podospora anserina S mat+ genomic DNA chromosome 3, supercontig 2 OS=Podospora anserina (strain S / ATCC MYA-4624 / DSM 980 / FGSC 10383) OX=515849 GN=PODANS_3_6050 PE=4 SV=1	B2B022	B2B022					0.748278	0.386781	0.917397	0.412535	-0.124382	-0.970439	-0.124382	-0.970439	7	7	7	29.4341	29.369	29.4618	29.0501	29.3861	29.4556						7	7	7	26.9	26.9	26.9	38.066	0	22.861	4151800000	37	6	6	6	5	6	6	6	6	6	5
tr|B2B163|B2B163_PODAN Glutamate decarboxylase OS=Podospora anserina (strain S / ATCC MYA-4624 / DSM 980 / FGSC 10383) OX=515849 GN=PODANS_3_9440 PE=3 SV=1	B2B163	B2B163					0.747664	0.387071	0.799181	0.41221	-0.323406	-0.969783	-0.323406	-0.969783	5	5	5	29.0076	27.9236	28.3226	28.293	27.9359	28.0546						5	5	5	11.4	11.4	11.4	58.333	0	62.599	2004200000	24	5	5	4	5	4	4	5	5	4	5
tr|B2AA33|B2AA33_PODAN Podospora anserina S mat+ genomic DNA chromosome 1, supercontig 1 OS=Podospora anserina (strain S / ATCC MYA-4624 / DSM 980 / FGSC 10383) OX=515849 GN=PODANS_1_2670 PE=3 SV=1	B2AA33	B2AA33					0.749755	0.389547	0.847146	0.40944	-0.239318	-0.9642	-0.239318	-0.9642	17	17	17	32.6994	31.8968	32.4983	32.2357	32.1065	32.0344						17	17	17	35.9	35.9	35.9	66.789	0	268.61	31172000000	189	17	16	16	17	16	16	17	16	16	17
tr|A0A090CD75|A0A090CD75_PODAN Uncharacterized protein OS=Podospora anserina (strain S / ATCC MYA-4624 / DSM 980 / FGSC 10383) OX=515849 PE=4 SV=1	A0A090CD75	A0A090CD75					0.754244	0.392278	0.673856	0.406406	-0.569487	-0.958079	-0.569487	-0.958079	6	6	6	31.4371	31.5983	31.5446	29.7877	31.7076	31.3762						6	6	6	58.8	58.8	58.8	17.356	0	72.375	16571000000	90	6	6	6	6	6	6	6	6	6	6
tr|B2AB88|B2AB88_PODAN Podospora anserina S mat+ genomic DNA chromosome 1, supercontig 1 OS=Podospora anserina (strain S / ATCC MYA-4624 / DSM 980 / FGSC 10383) OX=515849 GN=PODANS_1_6500 PE=4 SV=1	B2AB88	B2AB88					0.754883	0.392883	0.832104	0.405737	-0.265165	-0.956728	-0.265165	-0.956728	3	3	3	28.5123	28.5108	28.3186	27.6473	28.509	28.3899						3	3	3	16.4	16.4	16.4	24.534	0	10.618	2044000000	14	3	3	3	3	3	2	3	3	3	3
tr|A0A090CFS8|A0A090CFS8_PODAN Putative TBC1 domain family member 20 OS=Podospora anserina (strain S / ATCC MYA-4624 / DSM 980 / FGSC 10383) OX=515849 PE=4 SV=1	A0A090CFS8	A0A090CFS8					0.75501	0.393204	0.172314	0.405382	-2.53689	-0.956011	-2.53689	-0.956011	1	1	1	23.4135	22.9876	23.9953	24.1439	22.9425	15.6994						1	1	1	3.2	3.2	3.2	48.888	0.0063739	2.0082	62811000	4	1	1	1	1	1	0	1	1	1	1
tr|A0A090CUG5|A0A090CUG5_PODAN Serine hydroxymethyltransferase OS=Podospora anserina (strain S / ATCC MYA-4624 / DSM 980 / FGSC 10383) OX=515849 PE=3 SV=1	A0A090CUG5	A0A090CUG5					0.760377	0.395583	0.85207	0.402762	-0.230956	-0.950719	-0.230956	-0.950719	25	25	24	34.7181	33.9619	34.2441	33.8777	34.2116	34.1419						25	25	24	60.8	60.8	58.9	53.099	0	323.31	120030000000	267	23	23	22	23	24	22	23	23	22	23
tr|B2B6I6|B2B6I6_PODAN Podospora anserina S mat+ genomic DNA chromosome 2, supercontig 2 OS=Podospora anserina (strain S / ATCC MYA-4624 / DSM 980 / FGSC 10383) OX=515849 GN=PODANS_2_7900 PE=4 SV=1	B2B6I6	B2B6I6					0.760251	0.39603	0.885898	0.402271	-0.174788	-0.949727	-0.174788	-0.949727	3	3	3	30.7134	30.524	30.4875	30.0641	30.5217	30.6148						3	3	3	5.9	5.9	5.9	59.759	0	21.549	9118300000	38	3	3	3	3	3	3	3	3	3	3
tr|B2AD94|B2AD94_PODAN Podospora anserina S mat+ genomic DNA chromosome 4, supercontig 1 OS=Podospora anserina (strain S / ATCC MYA-4624 / DSM 980 / FGSC 10383) OX=515849 GN=PODANS_4_460 PE=4 SV=1	B2AD94	B2AD94					0.759346	0.396333	0.862915	0.40194	-0.21271	-0.949057	-0.21271	-0.949057	10	10	10	29.7242	29.2224	29.1336	29.1209	29.3813	28.9398						10	10	10	28.1	28.1	28.1	57.659	0	88.386	3900200000	42	10	10	7	8	8	8	10	10	7	8
tr|B2AFK7|B2AFK7_PODAN Podospora anserina S mat+ genomic DNA chromosome 5, supercontig 7 OS=Podospora anserina (strain S / ATCC MYA-4624 / DSM 980 / FGSC 10383) OX=515849 GN=PODANS_5_11880 PE=4 SV=1	B2AFK7	B2AFK7					0.761932	0.398463	0.631586	0.399612	-0.662949	-0.944349	-0.662949	-0.944349	4	3	3	27.0665	26.3036	27.1383	24.8846	26.9556	26.6794						4	3	3	15.3	11.9	11.9	28.3	0	5.196	639690000	8	2	3	3	3	3	4	1	2	2	2
tr|B2B7U5|B2B7U5_PODAN Podospora anserina S mat+ genomic DNA chromosome 2, supercontig 2 OS=Podospora anserina (strain S / ATCC MYA-4624 / DSM 980 / FGSC 10383) OX=515849 GN=PODANS_2_12290 PE=4 SV=1	B2B7U5	B2B7U5					0.767095	0.40065	0.746972	0.397234	-0.420874	-0.939536	-0.420874	-0.939536	3	2	2	24.7636	25.3834	25.4936	25.5394	24.5892	24.2493						3	2	2	20.1	20.1	20.1	16.997	0	9.602	213440000	3	2	2	2	3	2	2	1	1	1	2
tr|B2B6C4|B2B6C4_PODAN Podospora anserina S mat+ genomic DNA chromosome 2, supercontig 2 OS=Podospora anserina (strain S / ATCC MYA-4624 / DSM 980 / FGSC 10383) OX=515849 GN=PODANS_2_7370 PE=4 SV=1	B2B6C4	B2B6C4					0.76624	0.401429	0.474228	0.396392	-1.07635	-0.937829	-1.07635	-0.937829	8	8	8	28.9788	28.3689	28.7043	25.4259	28.1616	29.2355						8	8	8	37.9	37.9	37.9	28.268	0	50.223	2296900000	36	5	5	5	4	6	8	5	5	5	4
tr|B2AXC2|B2AXC2_PODAN Podospora anserina S mat+ genomic DNA chromosome 7, supercontig 1 OS=Podospora anserina (strain S / ATCC MYA-4624 / DSM 980 / FGSC 10383) OX=515849 GN=PODANS_7_10070 PE=3 SV=1	B2AXC2	B2AXC2					0.764563	0.401764	0.820271	0.396029	-0.285828	-0.937095	-0.285828	-0.937095	2	2	2	26.0672	26.1566	25.8815	26.3351	25.5013	25.4114						2	2	2	10.7	10.7	10.7	18.801	0	3.9449	383710000	9	2	2	2	2	2	2	2	2	2	2
tr|B2ASI2|B2ASI2_PODAN Podospora anserina S mat+ genomic DNA chromosome 1, supercontig 6 OS=Podospora anserina (strain S / ATCC MYA-4624 / DSM 980 / FGSC 10383) OX=515849 GN=PODANS_1_23580 PE=4 SV=1	B2ASI2	B2ASI2					0.769624	0.406522	0.83199	0.390916	-0.265362	-0.926727	-0.265362	-0.926727	3	3	3	26.4863	25.6539	26.32	25.6259	25.9989	26.0393						3	3	3	15.2	15.2	15.2	37.324	0	5.0757	418380000	10	3	3	2	3	2	3	3	3	2	3
tr|B2AZ61|B2AZ61_PODAN Podospora anserina S mat+ genomic DNA chromosome 3, supercontig 2 OS=Podospora anserina (strain S / ATCC MYA-4624 / DSM 980 / FGSC 10383) OX=515849 GN=PODANS_3_4240 PE=4 SV=1	B2AZ61	B2AZ61					0.769206	0.406871	0.869221	0.390543	-0.202206	-0.92597	-0.202206	-0.92597	3	3	3	28.9291	28.3308	28.539	28.6566	28.2475	28.2882						3	3	3	2.7	2.7	2.7	106.02	0	30.409	2308400000	39	3	3	3	3	3	3	3	3	3	3
tr|B2B319|B2B319_PODAN Podospora anserina S mat+ genomic DNA chromosome 6, supercontig 2 OS=Podospora anserina (strain S / ATCC MYA-4624 / DSM 980 / FGSC 10383) OX=515849 GN=PODANS_6_1350 PE=4 SV=1	B2B319	B2B319					0.773475	0.410326	0.136511	0.386871	-2.87291	-0.918511	-2.87291	-0.918511	1	1	1	24.384	24.7805	25.254	15.6994	24.9326	25.1678						1	1	1	1.7	1.7	1.7	75.131	0	13.968	160440000	3	1	1	1	0	1	1	1	1	1	0
tr|B2B811|B2B811_PODAN Podospora anserina S mat+ genomic DNA chromosome 2, supercontig 2 OS=Podospora anserina (strain S / ATCC MYA-4624 / DSM 980 / FGSC 10383) OX=515849 GN=PODANS_2_12930 PE=4 SV=1	B2B811	B2B811					0.773313	0.410644	0.830727	0.386535	-0.267554	-0.917827	-0.267554	-0.917827	4	4	4	26.7474	26.2859	26.5009	25.8401	26.1641	26.7274						4	4	4	9	9	9	57.791	0	7.2964	535820000	10	3	3	3	3	3	3	3	3	3	3
tr|B2B7X8|B2B7X8_PODAN Isocitrate lyase OS=Podospora anserina (strain S / ATCC MYA-4624 / DSM 980 / FGSC 10383) OX=515849 GN=PODANS_2_12610 PE=3 SV=1	B2B7X8	B2B7X8					0.785529	0.417324	0.580548	0.379526	-0.784512	-0.90356	-0.784512	-0.90356	2	2	2	27.2153	25.2408	26.4319	26.8107	24.7775	24.9464						2	2	2	4.2	4.2	4.2	61.034	0	10.622	464810000	5	2	2	1	2	2	2	2	2	1	2
tr|B2AZU3|B2AZU3_PODAN Podospora anserina S mat+ genomic DNA chromosome 3, supercontig 2 OS=Podospora anserina (strain S / ATCC MYA-4624 / DSM 980 / FGSC 10383) OX=515849 GN=PODANS_3_2460 PE=4 SV=1	B2AZU3	B2AZU3					0.800512	0.426614	0.922721	0.369965	-0.116034	-0.884033	-0.116034	-0.884033	7	7	7	29.6543	29.2858	29.3744	29.4133	29.3685	29.1846						7	7	7	21	21	21	36.985	0	22.284	4213600000	46	6	6	6	6	7	6	6	6	6	6
tr|B2ARK3|B2ARK3_PODAN Podospora anserina S mat+ genomic DNA chromosome 4, supercontig 4 OS=Podospora anserina (strain S / ATCC MYA-4624 / DSM 980 / FGSC 10383) OX=515849 GN=PODANS_4_7190 PE=4 SV=1	B2ARK3	B2ARK3					0.799078	0.429096	0.173154	0.367446	-2.52987	-0.878876	-2.52987	-0.878876	2	2	2	24.0187	23.8633	24.0729	24.3316	24.3342	15.6994						2	2	2	14.8	14.8	14.8	17.377	0	5.7418	92167000	2	1	1	1	1	2	0	1	1	1	1
tr|A0A090D554|A0A090D554_PODAN Uncharacterized protein OS=Podospora anserina (strain S / ATCC MYA-4624 / DSM 980 / FGSC 10383) OX=515849 PE=4 SV=1	A0A090D554	A0A090D554					0.798127	0.429473	0.189834	0.367064	-2.39719	-0.878093	-2.39719	-0.878093	1	1	1	23.4912	23.3464	23.7619	23.471	15.6994	24.2375						1	1	1	0.5	0.5	0.5	301.01	0.006347	1.9246	68089000	1	1	1	1	1	0	1	1	1	1	1
tr|B2AY30|B2AY30_PODAN Podospora anserina S mat+ genomic DNA chromosome 1, supercontig 2 OS=Podospora anserina (strain S / ATCC MYA-4624 / DSM 980 / FGSC 10383) OX=515849 GN=PODANS_1_9680 PE=4 SV=1	B2AY30	B2AY30					0.80128	0.431376	0.116693	0.365144	-3.09921	-0.87416	-3.09921	-0.87416	2	2	2	23.0258	25.9621	27.2829	25.43	15.6994	25.8437						2	2	2	8.6	8.6	8.6	33.733	0	11.231	342630000	2	1	1	2	2	0	2	1	1	2	2
tr|B2B5S6|B2B5S6_PODAN Proteasome subunit alpha type OS=Podospora anserina (strain S / ATCC MYA-4624 / DSM 980 / FGSC 10383) OX=515849 GN=PODANS_2_5640 PE=3 SV=1	B2B5S6	B2B5S6					0.800166	0.431844	0.946266	0.364673	-0.0796827	-0.873193	-0.0796827	-0.873193	12	12	12	31.967	31.8001	31.9497	31.786	31.9698	31.7219						12	12	12	49.1	49.1	49.1	29.664	0	158.86	23545000000	118	11	11	12	12	12	12	11	11	12	12
tr|B2AXI0|B2AXI0_PODAN Malate dehydrogenase OS=Podospora anserina (strain S / ATCC MYA-4624 / DSM 980 / FGSC 10383) OX=515849 GN=PODANS_7_10620 PE=3 SV=1	B2AXI0	B2AXI0					0.810094	0.437259	0.917503	0.359261	-0.124215	-0.862081	-0.124215	-0.862081	15	14	14	34.5266	34.836	34.7753	34.3805	34.747	34.6379						15	14	14	78	73.9	73.9	25.559	0	260.86	163420000000	235	15	15	15	15	15	15	14	14	14	14
tr|B2B829|B2B829_PODAN Podospora anserina S mat+ genomic DNA chromosome 2, supercontig 2 OS=Podospora anserina (strain S / ATCC MYA-4624 / DSM 980 / FGSC 10383) OX=515849 GN=PODANS_2_13110 PE=4 SV=1	B2B829	B2B829					0.808666	0.438547	0.147025	0.357984	-2.76587	-0.859456	-2.76587	-0.859456	1	1	1	24.7193	25.5465	24.179	24.6267	25.8211	15.6994						1	1	1	4.1	4.1	4.1	35.076	0	6.8397	180810000	4	1	1	1	1	1	0	1	1	1	1
tr|B2B5S0|B2B5S0_PODAN Podospora anserina S mat+ genomic DNA chromosome 2, supercontig 2 OS=Podospora anserina (strain S / ATCC MYA-4624 / DSM 980 / FGSC 10383) OX=515849 GN=PODANS_2_5580 PE=3 SV=1	B2B5S0	B2B5S0					0.810463	0.440343	0.908004	0.356209	-0.13923	-0.855804	-0.13923	-0.855804	16	16	16	31.7858	31.7476	31.7463	31.3021	31.833	31.7268						16	16	16	41	41	41	49.667	0	253.72	21172000000	128	15	13	14	14	15	14	15	13	14	14
tr|A0A090CHV4|A0A090CHV4_PODAN Uncharacterized protein OS=Podospora anserina (strain S / ATCC MYA-4624 / DSM 980 / FGSC 10383) OX=515849 PE=4 SV=1	A0A090CHV4	A0A090CHV4					0.816845	0.445134	0.889428	0.351509	-0.16905	-0.84612	-0.16905	-0.84612	5	5	5	28.8675	29.2824	29.1718	29.2445	28.8417	28.7283						5	5	5	64.6	64.6	64.6	14.3	0	17.679	3309300000	25	4	4	4	5	5	5	4	4	4	5
tr|B2AND0|B2AND0_PODAN Podospora anserina S mat+ genomic DNA chromosome 6, supercontig 4 OS=Podospora anserina (strain S / ATCC MYA-4624 / DSM 980 / FGSC 10383) OX=515849 GN=PODANS_6_10220 PE=4 SV=1	B2AND0	B2AND0					0.816332	0.446159	0.732282	0.35051	-0.449528	-0.84406	-0.449528	-0.84406	4	4	4	27.0537	26.3532	26.504	25.3381	26.1951	27.0292						4	4	4	17.2	17.2	17.2	33.627	0	21.69	576400000	7	4	3	3	2	3	3	4	3	3	2
tr|B2B514|B2B514_PODAN Importin subunit alpha OS=Podospora anserina (strain S / ATCC MYA-4624 / DSM 980 / FGSC 10383) OX=515849 GN=PODANS_2_3200 PE=3 SV=1	B2B514	B2B514					0.813026	0.447254	0.630229	0.349445	-0.666051	-0.841862	-0.666051	-0.841862	2	2	2	26.4223	26.2247	26.3879	24.9347	24.8464	27.2557						2	2	2	4.1	4.1	4.1	64.245	0	6.4252	478660000	7	2	2	2	2	2	2	2	2	2	2
tr|B2AL21|B2AL21_PODAN Podospora anserina S mat+ genomic DNA chromosome 5, supercontig 9 OS=Podospora anserina (strain S / ATCC MYA-4624 / DSM 980 / FGSC 10383) OX=515849 GN=PODANS_5_9690 PE=4 SV=1	B2AL21	B2AL21					0.813203	0.447863	0.188724	0.348855	-2.40565	-0.840642	-2.40565	-0.840642	2	2	2	23.8429	23.793	23.8267	15.6994	24.0199	24.5264						2	2	2	5.7	5.7	5.7	51.546	0	3.7363	85634000	3	2	2	2	0	1	1	2	2	2	0
tr|B2B810|B2B810_PODAN Podospora anserina S mat+ genomic DNA chromosome 2, supercontig 2 OS=Podospora anserina (strain S / ATCC MYA-4624 / DSM 980 / FGSC 10383) OX=515849 GN=PODANS_2_12920 PE=4 SV=1	B2B810	B2B810					0.815885	0.450309	0.841534	0.34649	-0.248906	-0.835756	-0.248906	-0.835756	3	3	3	28.4908	28.1513	27.9926	28.335	28.0885	27.4645						3	3	3	31	31	31	15.111	0	62.699	1751600000	21	3	3	3	2	2	2	3	3	3	2
tr|B2B5M5|B2B5M5_PODAN Podospora anserina S mat+ genomic DNA chromosome 2, supercontig 2 OS=Podospora anserina (strain S / ATCC MYA-4624 / DSM 980 / FGSC 10383) OX=515849 GN=PODANS_2_5140 PE=3 SV=1	B2B5M5	B2B5M5					0.815296	0.452036	0.160712	0.344827	-2.63745	-0.832317	-2.63745	-0.832317	1	1	1	24.7498	24.4952	24.7292	25.5495	24.813	15.6994						1	1	1	3.1	3.1	3.1	48.802	0	7.3906	158260000	1	1	1	1	1	1	0	1	1	1	1
sp|B2B3P6|LAP1_PODAN Leucine aminopeptidase 1 OS=Podospora anserina (strain S / ATCC MYA-4624 / DSM 980 / FGSC 10383) OX=515849 GN=LAP1 PE=3 SV=1	B2B3P6	B2B3P6					0.815302	0.452485	0.891185	0.344396	-0.166203	-0.831424	-0.166203	-0.831424	6	6	6	29.3658	28.923	29.2032	28.7292	29.257	29.0073						6	6	6	24.1	24.1	24.1	43.948	0	30.579	3444900000	29	6	6	5	4	6	4	6	6	5	4
tr|B2AWM8|B2AWM8_PODAN Podospora anserina S mat+ genomic DNA chromosome 7, supercontig 1 OS=Podospora anserina (strain S / ATCC MYA-4624 / DSM 980 / FGSC 10383) OX=515849 GN=PODANS_7_7700 PE=3 SV=1	B2AWM8	B2AWM8					0.813333	0.453489	0.908882	0.343434	-0.137835	-0.829433	-0.137835	-0.829433	16	16	16	31.7199	31.1676	31.3738	31.2165	31.3565	31.2748						16	16	16	36.3	36.3	36.3	56.572	0	203.56	16583000000	103	13	15	13	15	14	15	13	15	13	15
tr|B2AT46|B2AT46_PODAN Nicotinate-nucleotide pyrophosphorylase [carboxylating] OS=Podospora anserina (strain S / ATCC MYA-4624 / DSM 980 / FGSC 10383) OX=515849 GN=PODANS_1_14640 PE=3 SV=1	B2AT46	B2AT46					0.812266	0.455135	0.917932	0.34186	-0.123541	-0.826174	-0.123541	-0.826174	4	4	4	29.1271	28.8176	28.6746	28.8369	28.7945	28.6172						4	4	4	16	16	16	33.103	0	44.148	2844700000	32	4	4	4	4	4	4	4	4	4	4
tr|B2B0M9|B2B0M9_PODAN Podospora anserina S mat+ genomic DNA chromosome 3, supercontig 2 OS=Podospora anserina (strain S / ATCC MYA-4624 / DSM 980 / FGSC 10383) OX=515849 GN=PODANS_3_6680 PE=4 SV=1	B2B0M9	B2B0M9					0.814803	0.457747	0.887194	0.339374	-0.172679	-0.821021	-0.172679	-0.821021	3	3	3	27.2823	27.747	27.4312	27.0304	27.5827	27.3293						3	3	3	16.2	16.2	16.2	26.408	0	12.358	1076200000	13	3	3	3	2	3	3	3	3	3	2
tr|B2AKR1|B2AKR1_PODAN Podospora anserina S mat+ genomic DNA chromosome 5, supercontig 9 OS=Podospora anserina (strain S / ATCC MYA-4624 / DSM 980 / FGSC 10383) OX=515849 GN=PODANS_5_8240 PE=4 SV=1	B2AKR1	B2AKR1					0.819914	0.465867	0.874632	0.331738	-0.193253	-0.805151	-0.193253	-0.805151	6	6	6	29.5093	29.8507	29.8663	29.1834	29.9103	29.5529						6	6	6	37.8	37.8	37.8	20.039	0	26.849	5117300000	75	5	5	6	6	6	5	5	5	6	6
tr|B2ALP3|B2ALP3_PODAN Podospora anserina S mat+ genomic DNA chromosome 5, supercontig 4 OS=Podospora anserina (strain S / ATCC MYA-4624 / DSM 980 / FGSC 10383) OX=515849 GN=PODANS_5_4230 PE=4 SV=1	B2ALP3	B2ALP3					0.820136	0.466785	0.860957	0.330883	-0.215986	-0.80337	-0.215986	-0.80337	2	2	2	26.5948	26.1158	26.5226	25.7479	26.4051	26.4322						2	2	2	17.2	17.2	17.2	20.615	0	32.376	506230000	9	2	2	1	1	2	2	2	2	1	1
tr|B2AC35|B2AC35_PODAN Podospora anserina S mat+ genomic DNA chromosome 2, supercontig 3 OS=Podospora anserina (strain S / ATCC MYA-4624 / DSM 980 / FGSC 10383) OX=515849 GN=PODANS_2_14080 PE=4 SV=1	B2AC35	B2AC35					0.821614	0.467926	0.838718	0.329823	-0.253743	-0.801162	-0.253743	-0.801162	8	8	8	29.1698	29.2848	29.1824	28.3522	29.4072	29.1163						8	8	8	29	29	29	39.025	0	38.001	3503700000	23	5	5	7	5	6	5	5	5	7	5
tr|B2AML5|B2AML5_PODAN Podospora anserina S mat+ genomic DNA chromosome 5, supercontig 5 OS=Podospora anserina (strain S / ATCC MYA-4624 / DSM 980 / FGSC 10383) OX=515849 GN=PODANS_5_4450 PE=4 SV=1	B2AML5	B2AML5					0.821042	0.468756	0.810271	0.329053	-0.303523	-0.799558	-0.303523	-0.799558	2	2	2	26.8742	26.5852	27.0012	25.8106	26.7557	26.9837						2	2	2	7.7	7.7	7.7	45.691	0	5.1158	662890000	19	2	2	2	2	2	2	2	2	2	2
tr|B2B361|B2B361_PODAN Podospora anserina S mat+ genomic DNA chromosome 6, supercontig 2 OS=Podospora anserina (strain S / ATCC MYA-4624 / DSM 980 / FGSC 10383) OX=515849 GN=PODANS_6_960 PE=4 SV=1	B2B361	B2B361					0.821667	0.471785	0.843502	0.326256	-0.245537	-0.793723	-0.245537	-0.793723	2	2	2	26.8868	26.8473	26.7712	27.1589	26.1037	26.5061						2	2	2	17.5	17.5	17.5	17.762	0	17.327	676630000	13	2	2	2	2	2	2	2	2	2	2
tr|B2AYG5|B2AYG5_PODAN Podospora anserina S mat+ genomic DNA chromosome 1, supercontig 2 OS=Podospora anserina (strain S / ATCC MYA-4624 / DSM 980 / FGSC 10383) OX=515849 GN=PODANS_1_11030 PE=4 SV=1	B2AYG5	B2AYG5					0.82128	0.474411	0.247428	0.323845	-2.01492	-0.788685	-2.01492	-0.788685	2	2	2	22.6065	22.8233	23.0245	23.3322	15.6994	23.378						2	2	2	14.2	14.2	14.2	27.755	0	3.4236	43803000	1	1	2	1	1	0	1	1	2	1	1
tr|A0A090CCC2|A0A090CCC2_PODAN Tubulin alpha chain OS=Podospora anserina (strain S / ATCC MYA-4624 / DSM 980 / FGSC 10383) OX=515849 PE=3 SV=1	A0A090CCC2	A0A090CCC2					0.831784	0.488114	0.115961	0.311479	-3.10829	-0.762749	-3.10829	-0.762749	5	5	5	26.8901	26.8699	26.7839	28.9139	26.6057	15.6994						5	5	5	18.9	18.9	18.9	50.409	0	92.559	984630000	9	2	3	3	4	3	1	2	3	3	4
tr|B2AM25|B2AM25_PODAN Podospora anserina S mat+ genomic DNA chromosome 1, supercontig 3 OS=Podospora anserina (strain S / ATCC MYA-4624 / DSM 980 / FGSC 10383) OX=515849 GN=PODANS_1_14020 PE=4 SV=1	B2AM25	B2AM25					0.837546	0.493927	0.955167	0.306337	-0.0661748	-0.751914	-0.0661748	-0.751914	11	11	11	31.2661	31.1709	31.2628	31.2276	31.2694	31.0043						11	11	11	51.9	51.9	51.9	29.155	0	95.1	14833000000	108	10	10	10	10	10	10	10	10	10	10
tr|B2AC85|B2AC85_PODAN Podospora anserina S mat+ genomic DNA chromosome 3, supercontig 1 OS=Podospora anserina (strain S / ATCC MYA-4624 / DSM 980 / FGSC 10383) OX=515849 GN=PODANS_3_210 PE=4 SV=1	B2AC85	B2AC85					0.840141	0.495236	0.909794	0.305188	-0.136388	-0.749487	-0.136388	-0.749487	9	9	9	29.0637	28.9575	28.8842	28.5181	29.1205	28.8576						9	9	9	27	27	27	51.267	0	50.538	3032300000	22	8	7	8	7	7	5	8	7	8	7
tr|B2B367|B2B367_PODAN Podospora anserina S mat+ genomic DNA chromosome 6, supercontig 2 OS=Podospora anserina (strain S / ATCC MYA-4624 / DSM 980 / FGSC 10383) OX=515849 GN=PODANS_6_890 PE=4 SV=1	B2B367	B2B367					0.834454	0.496804	0.897515	0.303815	-0.155992	-0.746588	-0.155992	-0.746588	1	1	1	26.9838	26.3078	26.4252	26.3902	26.4284	26.4304						1	1	1	3.6	3.6	3.6	44.49	0	10.105	574600000	11	1	1	1	1	1	1	1	1	1	1
tr|B2AYP1|B2AYP1_PODAN 6-phosphogluconate dehydrogenase, decarboxylating OS=Podospora anserina (strain S / ATCC MYA-4624 / DSM 980 / FGSC 10383) OX=515849 GN=PODANS_1_11750 PE=3 SV=1	B2AYP1	B2AYP1					0.833535	0.49828	0.890997	0.302526	-0.166508	-0.743863	-0.166508	-0.743863	21	21	21	34.6389	34.1708	34.2637	33.882	34.4769	34.2149						21	21	21	44.3	44.3	44.3	57.295	0	282.09	126680000000	253	20	21	20	20	21	20	20	21	20	20
tr|B2AXG1|B2AXG1_PODAN Podospora anserina S mat+ genomic DNA chromosome 7, supercontig 1 OS=Podospora anserina (strain S / ATCC MYA-4624 / DSM 980 / FGSC 10383) OX=515849 GN=PODANS_7_10450 PE=3 SV=1	B2AXG1	B2AXG1					0.834327	0.498749	0.890544	0.302118	-0.167241	-0.742998	-0.167241	-0.742998	10	10	10	29.7037	28.9572	29.1766	29.0511	29.1875	29.0972						10	10	10	22.6	22.6	22.6	60.63	0	42.182	3744200000	38	8	6	6	7	6	5	8	6	6	7
tr|B2AXY9|B2AXY9_PODAN Succinate dehydrogenase [ubiquinone] flavoprotein subunit, mitochondrial OS=Podospora anserina (strain S / ATCC MYA-4624 / DSM 980 / FGSC 10383) OX=515849 GN=PODANS_1_9290 PE=3 SV=1	B2AXY9	B2AXY9					0.833325	0.498779	0.914526	0.302092	-0.128904	-0.742944	-0.128904	-0.742944	13	13	13	29.5429	29.1242	29.604	29.4539	29.2712	29.1594						13	13	13	31.6	31.6	31.6	70.905	0	178.08	4166200000	42	10	9	9	7	9	6	10	9	9	7
tr|B2AY05|B2AY05_PODAN ATP synthase subunit gamma OS=Podospora anserina (strain S / ATCC MYA-4624 / DSM 980 / FGSC 10383) OX=515849 GN=PODANS_1_9450 PE=3 SV=1	B2AY05	B2AY05					0.832326	0.498789	0.95639	0.302083	-0.0643298	-0.742925	-0.0643298	-0.742925	9	9	9	34.0685	33.832	33.9301	33.8551	33.9803	33.8021						9	9	9	31.8	31.8	31.8	32.508	0	197.08	97198000000	136	9	7	7	7	6	7	9	7	7	7
tr|A0A090DCE4|A0A090DCE4_PODAN Proteasome subunit alpha type OS=Podospora anserina (strain S / ATCC MYA-4624 / DSM 980 / FGSC 10383) OX=515849 PE=3 SV=1	A0A090DCE4	A0A090DCE4					0.834859	0.502274	0.941327	0.299059	-0.0872326	-0.736522	-0.0872326	-0.736522	12	12	12	31.7587	31.4176	31.4694	31.503	31.5241	31.3568						12	12	12	61.2	61.2	61.2	29.519	0	109.13	18361000000	102	10	11	9	12	11	11	10	11	9	12
tr|B2AMM6|B2AMM6_PODAN Proteasome subunit beta type OS=Podospora anserina (strain S / ATCC MYA-4624 / DSM 980 / FGSC 10383) OX=515849 GN=PODANS_5_4560 PE=3 SV=1	B2AMM6	B2AMM6					0.834703	0.503092	0.905958	0.298353	-0.142483	-0.735026	-0.142483	-0.735026	6	6	6	29.3001	29.058	28.9332	28.7848	29.2768	28.8022						6	6	6	28.3	28.3	28.3	25.037	0	43.126	3313500000	33	5	4	5	5	5	3	5	4	5	5
tr|B2AMR6|B2AMR6_PODAN Podospora anserina S mat+ genomic DNA chromosome 5, supercontig 5 OS=Podospora anserina (strain S / ATCC MYA-4624 / DSM 980 / FGSC 10383) OX=515849 GN=PODANS_5_4960 PE=4 SV=1	B2AMR6	B2AMR6					0.84345	0.508714	0.206754	0.293527	-2.27402	-0.724779	-2.27402	-0.724779	1	1	1	24.323	23.5115	24.7768	15.6994	24.9518	25.138						1	1	1	3.2	3.2	3.2	53.9	0	10.28	131060000	4	1	1	1	0	1	1	1	1	1	0
tr|B2AU57|B2AU57_PODAN Podospora anserina S mat+ genomic DNA chromosome 1, supercontig 4 OS=Podospora anserina (strain S / ATCC MYA-4624 / DSM 980 / FGSC 10383) OX=515849 GN=PODANS_1_18020 PE=4 SV=1	B2AU57	B2AU57					0.842559	0.508858	0.143619	0.293403	-2.79969	-0.724516	-2.79969	-0.724516	4	4	4	25.6423	27.2907	24.7698	15.6994	28.2399	25.3645						4	4	4	15.6	15.6	15.6	38.536	0	14.87	605350000	5	2	2	2	0	4	1	2	2	2	0
tr|B2ARL0|B2ARL0_PODAN Podospora anserina S mat+ genomic DNA chromosome 4, supercontig 4 OS=Podospora anserina (strain S / ATCC MYA-4624 / DSM 980 / FGSC 10383) OX=515849 GN=PODANS_4_7120 PE=4 SV=1	B2ARL0	B2ARL0					0.841562	0.508881	0.875642	0.293383	-0.191587	-0.724475	-0.191587	-0.724475	8	8	8	28.1531	28.442	28.6936	27.8172	28.5105	28.3862						8	8	8	34.1	34.1	34.1	37.421	0	60.7	2067000000	24	6	6	7	7	7	6	6	6	7	7
tr|B2AES1|B2AES1_PODAN Podospora anserina S mat+ genomic DNA chromosome 5, supercontig 1 OS=Podospora anserina (strain S / ATCC MYA-4624 / DSM 980 / FGSC 10383) OX=515849 GN=PODANS_5_1700 PE=3 SV=1	B2AES1	B2AES1					0.840842	0.509143	0.905491	0.29316	-0.143228	-0.724	-0.143228	-0.724	14	14	14	31.1758	31.1889	31.4429	30.8177	31.4333	31.1268						14	14	14	40.6	40.6	40.6	46.326	0	198.68	14938000000	123	13	12	14	11	13	14	13	12	14	11
tr|B2B4D6|B2B4D6_PODAN Podospora anserina S mat+ genomic DNA chromosome 2, supercontig 2 OS=Podospora anserina (strain S / ATCC MYA-4624 / DSM 980 / FGSC 10383) OX=515849 GN=PODANS_2_920 PE=3 SV=1	B2B4D6	B2B4D6					0.840042	0.50974	0.920348	0.292651	-0.119748	-0.722918	-0.119748	-0.722918	8	8	8	29.0055	28.5595	28.7239	28.4545	28.6688	28.8063						8	8	8	23	23	23	47.06	0	56.788	2641900000	33	7	7	7	7	8	8	7	7	7	7
tr|A0A090CEV9|A0A090CEV9_PODAN Phosphotransferase OS=Podospora anserina (strain S / ATCC MYA-4624 / DSM 980 / FGSC 10383) OX=515849 PE=3 SV=1	A0A090CEV9	A0A090CEV9					0.839713	0.510092	0.886529	0.292352	-0.173761	-0.72228	-0.173761	-0.72228	18	18	18	30.6193	30.1221	30.3488	29.8038	30.3863	30.3789						18	18	18	42.9	42.9	42.9	57.531	0	164.8	7922100000	91	14	16	17	13	16	15	14	16	17	13
tr|B2B2I8|B2B2I8_PODAN Podospora anserina S mat+ genomic DNA chromosome 6, supercontig 2 OS=Podospora anserina (strain S / ATCC MYA-4624 / DSM 980 / FGSC 10383) OX=515849 GN=PODANS_6_3040 PE=4 SV=1	B2B2I8	B2B2I8					0.840347	0.512607	0.869393	0.290216	-0.20192	-0.717732	-0.20192	-0.717732	3	3	3	26.2938	26.8437	26.8511	26.5705	26.7615	26.0509						3	3	3	13	13	13	30.172	0	7.7625	606710000	14	3	3	3	3	3	3	3	3	3	3
tr|B2AZR3|B2AZR3_PODAN Podospora anserina S mat+ genomic DNA chromosome 3, supercontig 2 OS=Podospora anserina (strain S / ATCC MYA-4624 / DSM 980 / FGSC 10383) OX=515849 GN=PODANS_3_5260 PE=4 SV=1	B2AZR3	B2AZR3					0.838731	0.513306	0.939171	0.289623	-0.0905406	-0.71647	-0.0905406	-0.71647	8	8	8	30.1581	29.8516	29.9428	29.9977	29.719	29.9642						8	8	8	30.5	30.5	30.5	57.539	0	163.56	6202000000	35	8	6	7	7	8	5	8	6	7	7
tr|B2AUE3|B2AUE3_PODAN Podospora anserina S mat+ genomic DNA chromosome 1, supercontig 4 OS=Podospora anserina (strain S / ATCC MYA-4624 / DSM 980 / FGSC 10383) OX=515849 GN=PODANS_1_18850 PE=3 SV=1	B2AUE3	B2AUE3					0.837995	0.514392	0.918927	0.288706	-0.121978	-0.714514	-0.121978	-0.714514	3	3	3	27.644	27.2855	27.4239	27.346	27.0872	27.5543						3	3	3	11.4	11.4	11.4	43.825	0	74.497	1063600000	7	3	3	3	2	2	2	3	3	3	2
tr|B2B2X2|B2B2X2_PODAN Podospora anserina S mat+ genomic DNA chromosome 6, supercontig 2 OS=Podospora anserina (strain S / ATCC MYA-4624 / DSM 980 / FGSC 10383) OX=515849 GN=PODANS_6_1810 PE=4 SV=1	B2B2X2	B2B2X2					0.839413	0.516753	0.926172	0.286717	-0.110647	-0.710271	-0.110647	-0.710271	1	1	1	23.7261	23.8684	24.2162	23.9259	23.734	23.8189						1	1	1	6.3	6.3	6.3	28.203	0	3.8485	93369000	1	1	1	1	1	1	1	1	1	1	1
tr|B2ADS2|B2ADS2_PODAN Podospora anserina S mat+ genomic DNA chromosome 4, supercontig 1 OS=Podospora anserina (strain S / ATCC MYA-4624 / DSM 980 / FGSC 10383) OX=515849 GN=PODANS_4_1890 PE=4 SV=1	B2ADS2	B2ADS2					0.840339	0.517829	0.898305	0.285814	-0.154723	-0.708341	-0.154723	-0.708341	2	2	2	26.9045	26.2874	26.5481	26.6618	26.3792	26.2348						2	2	2	5.6	5.6	5.6	63.239	0	25.246	578070000	6	2	2	2	2	2	2	2	2	2	2
tr|B2AXV1|B2AXV1_PODAN Succinate dehydrogenase [ubiquinone] iron-sulfur subunit, mitochondrial OS=Podospora anserina (strain S / ATCC MYA-4624 / DSM 980 / FGSC 10383) OX=515849 GN=PODANS_1_8920 PE=3 SV=1	B2AXV1	B2AXV1					0.841346	0.519163	0.919406	0.284696	-0.121227	-0.705953	-0.121227	-0.705953	5	5	5	30.0054	30.3156	30.2238	29.9732	30.3435	29.8644						5	5	5	20	20	20	32.057	0	25.829	7061800000	46	5	5	5	5	5	5	5	5	5	5
tr|A0A090D6X4|A0A090D6X4_PODAN Carbonic anhydrase OS=Podospora anserina (strain S / ATCC MYA-4624 / DSM 980 / FGSC 10383) OX=515849 PE=3 SV=1	A0A090D6X4	A0A090D6X4					0.843088	0.521568	0.858266	0.282689	-0.220503	-0.701661	-0.220503	-0.701661	6	6	6	29.1197	29.4167	29.8992	29.6626	29.1928	28.9188						6	6	6	34.8	34.8	34.8	27.281	0	53.075	4272200000	50	4	4	6	5	5	5	4	4	6	5
tr|B2B4F8|B2B4F8_PODAN Podospora anserina S mat+ genomic DNA chromosome 2, supercontig 2 OS=Podospora anserina (strain S / ATCC MYA-4624 / DSM 980 / FGSC 10383) OX=515849 GN=PODANS_2_1140 PE=4 SV=1	B2B4F8	B2B4F8					0.844664	0.524759	0.881497	0.280041	-0.181973	-0.695987	-0.181973	-0.695987	5	5	5	28.4021	28.5563	29.0575	28.149	28.6386	28.6822						5	5	5	17.6	17.6	17.6	38.232	0	101.56	2454400000	39	3	3	4	4	5	5	3	3	4	4
tr|B2B450|B2B450_PODAN Podospora anserina S mat+ genomic DNA chromosome 2, supercontig 2 OS=Podospora anserina (strain S / ATCC MYA-4624 / DSM 980 / FGSC 10383) OX=515849 GN=PODANS_2_60 PE=3 SV=1	B2B450	B2B450					0.844889	0.525917	0.816565	0.279083	-0.292361	-0.693932	-0.292361	-0.693932	14	14	14	31.3079	30.7284	31.3287	30.1483	30.9078	31.4318						14	14	14	16.2	16.2	16.2	102.29	0	96.404	13239000000	59	12	11	12	10	11	10	12	11	12	10
tr|B2AD08|B2AD08_PODAN Podospora anserina S mat+ genomic DNA chromosome 3, supercontig 3 OS=Podospora anserina (strain S / ATCC MYA-4624 / DSM 980 / FGSC 10383) OX=515849 GN=PODANS_3_10800 PE=4 SV=1	B2AD08	B2AD08					0.843917	0.525918	0.911971	0.279082	-0.132941	-0.693932	-0.132941	-0.693932	12	12	12	31.1493	31.1894	31.0873	31.1068	31.2769	30.6435						12	12	12	37.8	37.8	37.8	49.964	0	93.452	13877000000	77	11	11	12	11	9	8	11	11	12	11
tr|B2B0M4|B2B0M4_PODAN Podospora anserina S mat+ genomic DNA chromosome 3, supercontig 2 OS=Podospora anserina (strain S / ATCC MYA-4624 / DSM 980 / FGSC 10383) OX=515849 GN=PODANS_3_6630 PE=4 SV=1	B2B0M4	B2B0M4					0.845421	0.528	0.217855	0.277366	-2.19856	-0.690248	-2.19856	-0.690248	2	2	2	23.8	24.3657	24.5778	15.6994	25.4076	25.0409						2	2	2	5.9	5.9	5.9	43.542	0	2.7737	149630000	3	1	1	1	2	2	2	1	1	1	2
tr|B2ANR7|B2ANR7_PODAN Podospora anserina S mat+ genomic DNA chromosome 6, supercontig 4 OS=Podospora anserina (strain S / ATCC MYA-4624 / DSM 980 / FGSC 10383) OX=515849 GN=PODANS_6_9860 PE=4 SV=1	B2ANR7	B2ANR7					0.848499	0.532355	0.898365	0.273798	-0.154626	-0.682576	-0.154626	-0.682576	8	8	8	28.9923	29.1801	29.2953	28.6046	29.3116	29.0877						8	8	8	47.3	47.3	47.3	28.789	0	65.356	3446000000	51	7	6	7	8	8	8	7	6	7	8
tr|A0A090D6L7|A0A090D6L7_PODAN Uncharacterized protein OS=Podospora anserina (strain S / ATCC MYA-4624 / DSM 980 / FGSC 10383) OX=515849 PE=4 SV=1	A0A090D6L7	A0A090D6L7					0.851237	0.534549	0.744648	0.272013	-0.42537	-0.67873	-0.42537	-0.67873	4	4	4	25.7775	27.1273	27.6781	26.0265	26.9508	26.3294						4	4	4	12.2	12.2	12.2	43.745	0	5.0069	701270000	7	3	4	3	3	4	2	3	4	3	3
tr|B2AZN1|B2AZN1_PODAN Podospora anserina S mat+ genomic DNA chromosome 3, supercontig 2 OS=Podospora anserina (strain S / ATCC MYA-4624 / DSM 980 / FGSC 10383) OX=515849 GN=PODANS_3_4980 PE=3 SV=1	B2AZN1	B2AZN1					0.853432	0.5366	0.738685	0.270349	-0.436969	-0.675143	-0.436969	-0.675143	12	12	12	30.9113	31.7484	31.2516	30.9608	31.8556	29.7841						12	12	12	55.6	55.6	55.6	29.603	0	172.98	15088000000	97	10	12	11	10	11	8	10	12	11	10
tr|B2AX95|B2AX95_PODAN Podospora anserina S mat+ genomic DNA chromosome 7, supercontig 1 OS=Podospora anserina (strain S / ATCC MYA-4624 / DSM 980 / FGSC 10383) OX=515849 GN=PODANS_7_9760 PE=4 SV=1	B2AX95	B2AX95					0.858457	0.540447	0.898401	0.267247	-0.154568	-0.668443	-0.154568	-0.668443	1	1	1	26.9283	26.6341	26.7093	26.9107	26.192	26.7053						1	1	1	5.9	5.9	5.9	24.655	0	15.398	653830000	17	1	1	1	1	1	1	1	1	1	1
tr|B2AQA6|B2AQA6_PODAN Podospora anserina S mat+ genomic DNA chromosome 4, supercontig 4 OS=Podospora anserina (strain S / ATCC MYA-4624 / DSM 980 / FGSC 10383) OX=515849 GN=PODANS_4_4810 PE=4 SV=1	B2AQA6	B2AQA6					0.860759	0.541796	0.849982	0.266164	-0.234496	-0.6661	-0.234496	-0.6661	15	15	15	31.7642	31.4786	31.7351	30.7457	31.799	31.7296						15	15	15	55.1	55.1	55.1	37.877	0	132.45	19312000000	112	14	14	13	13	13	15	14	14	13	13
tr|B2ABC2|B2ABC2_PODAN Podospora anserina S mat+ genomic DNA chromosome 1, supercontig 1 OS=Podospora anserina (strain S / ATCC MYA-4624 / DSM 980 / FGSC 10383) OX=515849 GN=PODANS_1_6830 PE=3 SV=1	B2ABC2	B2ABC2					0.863647	0.546276	0.888063	0.262588	-0.171267	-0.658353	-0.171267	-0.658353	6	6	6	28.8704	29.0282	29.2936	28.4559	28.9924	29.2301						6	6	6	22.6	22.6	22.6	36.746	0	58.248	3228300000	25	6	4	6	5	6	5	6	4	6	5
tr|B2AZP5|B2AZP5_PODAN Glyceraldehyde-3-phosphate dehydrogenase OS=Podospora anserina (strain S / ATCC MYA-4624 / DSM 980 / FGSC 10383) OX=515849 GN=PODANS_3_5110 PE=3 SV=1	B2AZP5	B2AZP5					0.865003	0.547654	0.954464	0.261494	-0.0672379	-0.655979	-0.0672379	-0.655979	23	23	23	37.3224	37.1856	37.1449	37.1741	37.2884	36.9887						23	23	23	75.1	75.1	75.1	36.212	0	323.31	950540000000	616	23	23	23	23	23	23	23	23	23	23
tr|B2ASM0|B2ASM0_PODAN Alpha-1,4 glucan phosphorylase OS=Podospora anserina (strain S / ATCC MYA-4624 / DSM 980 / FGSC 10383) OX=515849 GN=PODANS_1_23940 PE=3 SV=1	B2ASM0	B2ASM0					0.864469	0.548774	0.253952	0.260606	-1.97737	-0.654052	-1.97737	-0.654052	2	2	2	24.6788	23.1106	22.7065	23.4761	25.3884	15.6994						2	2	2	3.6	3.6	3.6	100.58	0	3.9114	98346000	2	2	2	2	2	1	0	2	2	2	2
tr|A0A090D418|A0A090D418_PODAN Putative bifunctional purine biosynthesis protein OS=Podospora anserina (strain S / ATCC MYA-4624 / DSM 980 / FGSC 10383) OX=515849 PE=3 SV=1	A0A090D418	A0A090D418					0.865554	0.550006	0.95048	0.259633	-0.0732721	-0.651936	-0.0732721	-0.651936	17	17	17	30.2696	30.2163	30.4434	30.0919	30.3989	30.2187						17	17	17	38.7	38.7	38.7	64.827	0	148.81	7962700000	75	16	14	17	17	14	15	16	14	17	17
tr|B2ACV8|B2ACV8_PODAN Aspartate aminotransferase OS=Podospora anserina (strain S / ATCC MYA-4624 / DSM 980 / FGSC 10383) OX=515849 GN=PODANS_3_11290 PE=4 SV=1	B2ACV8	B2ACV8					0.874072	0.555727	0.949218	0.255139	-0.075189	-0.642154	-0.075189	-0.642154	19	19	19	34.3546	34.1079	34.1317	34.2493	34.1628	33.9565						19	19	19	58.8	58.8	58.8	42.962	0	323.31	116110000000	265	19	19	19	19	19	19	19	19	19	19
tr|B2AYF5|B2AYF5_PODAN Proliferating cell nuclear antigen OS=Podospora anserina (strain S / ATCC MYA-4624 / DSM 980 / FGSC 10383) OX=515849 GN=PODANS_1_10930 PE=3 SV=1	B2AYF5	B2AYF5					0.879151	0.563274	0.950675	0.24928	-0.0729764	-0.629353	-0.0729764	-0.629353	6	6	6	30.4663	30.4951	30.521	30.486	30.5797	30.1979						6	6	6	25.5	25.5	25.5	28.386	0	54.88	8877600000	75	5	5	5	5	6	5	5	5	5	5
tr|B2A903|B2A903_PODAN Podospora anserina S mat+ genomic DNA chromosome 1, supercontig 1 OS=Podospora anserina (strain S / ATCC MYA-4624 / DSM 980 / FGSC 10383) OX=515849 GN=PODANS_1_7990 PE=4 SV=1	B2A903	B2A903					0.87883	0.563765	0.91518	0.248902	-0.127872	-0.628524	-0.127872	-0.628524	1	1	1	26.4115	26.0872	26.29	25.775	26.3034	26.3267						1	1	1	9.8	9.8	9.8	21.156	0	16.329	467000000	9	1	1	1	1	1	1	1	1	1	1
tr|A0A090CVS5|A0A090CVS5_PODAN Putative mitochondrial of 3-hydroxyisobutyrate dehydrogenase OS=Podospora anserina (strain S / ATCC MYA-4624 / DSM 980 / FGSC 10383) OX=515849 PE=4 SV=1	A0A090CVS5	A0A090CVS5					0.880672	0.567272	0.840617	0.246208	-0.250479	-0.622618	-0.250479	-0.622618	5	5	5	29.9798	29.6471	29.8073	28.782	30.0037	29.897						5	5	5	15.2	15.2	15.2	38.078	0	102.04	5376800000	35	4	4	4	5	4	4	4	4	4	5
tr|B2AZH2|B2AZH2_PODAN Podospora anserina S mat+ genomic DNA chromosome 3, supercontig 2 OS=Podospora anserina (strain S / ATCC MYA-4624 / DSM 980 / FGSC 10383) OX=515849 GN=PODANS_3_4430 PE=4 SV=1	B2AZH2	B2AZH2					0.882102	0.568595	0.89312	0.245197	-0.163074	-0.620397	-0.163074	-0.620397	4	4	4	27.4201	27.6543	28.078	27.8808	27.264	27.5184						4	4	4	16.2	16.2	16.2	21.893	0	6.7728	1274700000	15	3	2	3	4	3	3	3	2	3	4
tr|B2AZF3|B2AZF3_PODAN Podospora anserina S mat+ genomic DNA chromosome 3, supercontig 2 OS=Podospora anserina (strain S / ATCC MYA-4624 / DSM 980 / FGSC 10383) OX=515849 GN=PODANS_3_3500 PE=4 SV=1	B2AZF3	B2AZF3					0.88123	0.568646	0.920551	0.245158	-0.119431	-0.620311	-0.119431	-0.620311	2	2	2	27.6296	27.0235	27.1915	27.0833	27.2943	27.1087						2	2	2	6	6	6	42.05	0	3.7831	948880000	15	2	2	2	2	2	1	2	2	2	2
tr|B2AE98|B2AE98_PODAN Podospora anserina S mat+ genomic DNA chromosome 4, supercontig 3 OS=Podospora anserina (strain S / ATCC MYA-4624 / DSM 980 / FGSC 10383) OX=515849 GN=PODANS_4_9810 PE=4 SV=1	B2AE98	B2AE98					0.880253	0.56865	0.668925	0.245155	-0.580083	-0.620306	-0.580083	-0.620306	7	7	7	29.6105	29.7579	28.6356	27.0305	29.7662	29.467						7	7	7	22.9	22.9	22.9	41.06	0	87.175	3936800000	34	6	7	7	3	6	7	6	7	7	3
tr|B2B6I5|B2B6I5_PODAN Podospora anserina S mat+ genomic DNA chromosome 2, supercontig 2 OS=Podospora anserina (strain S / ATCC MYA-4624 / DSM 980 / FGSC 10383) OX=515849 GN=PODANS_2_7890 PE=4 SV=1	B2B6I5	B2B6I5					0.879504	0.568764	0.888637	0.245068	-0.170334	-0.620113	-0.170334	-0.620113	15	15	15	32.321	32.0839	32.3694	31.5853	32.222	32.4559						15	15	15	64	64	64	37.081	0	163.87	29638000000	141	15	14	15	15	15	15	15	14	15	15
tr|B2ACQ8|B2ACQ8_PODAN Aspartate aminotransferase OS=Podospora anserina (strain S / ATCC MYA-4624 / DSM 980 / FGSC 10383) OX=515849 GN=PODANS_3_1780 PE=4 SV=1	B2ACQ8	B2ACQ8					0.877998	0.569056	0.937643	0.244845	-0.0928891	-0.619624	-0.0928891	-0.619624	17	17	17	32.7434	32.4155	32.3635	32.2933	32.5934	32.357						17	17	17	62	62	62	49.354	0	323.31	35689000000	156	16	14	14	16	14	14	16	14	14	16
tr|B2ANZ0|B2ANZ0_PODAN Podospora anserina S mat+ genomic DNA chromosome 7, supercontig 3 OS=Podospora anserina (strain S / ATCC MYA-4624 / DSM 980 / FGSC 10383) OX=515849 GN=PODANS_7_970 PE=4 SV=1	B2ANZ0	B2ANZ0					0.879626	0.572983	0.82732	0.241858	-0.273482	-0.613056	-0.273482	-0.613056	2	2	2	29.5425	29.2786	28.8	28.609	29.7093	28.4824						2	2	2	24.8	24.8	24.8	23.602	0	28.171	3562800000	13	2	2	2	1	2	2	2	2	2	1
tr|B2AYX5|B2AYX5_PODAN Cytochrome c& encoded by the cyc1 protein OS=Podospora anserina (strain S / ATCC MYA-4624 / DSM 980 / FGSC 10383) OX=515849 GN=PODANS_1_12550 PE=4 SV=1	B2AYX5	B2AYX5					0.880276	0.576536	0.952182	0.239174	-0.0706908	-0.607138	-0.0706908	-0.607138	8	8	8	29.9286	30.1174	30.2674	29.9936	29.9507	30.157						8	8	8	29.8	29.8	29.8	35.707	0	44.379	6783000000	62	6	7	8	5	8	4	6	7	8	5
tr|B2B3G0|B2B3G0_PODAN Podospora anserina S mat+ genomic DNA chromosome 6, supercontig 2 OS=Podospora anserina (strain S / ATCC MYA-4624 / DSM 980 / FGSC 10383) OX=515849 GN=PODANS_6_120 PE=4 SV=1	B2B3G0	B2B3G0					0.879882	0.577099	0.831242	0.23875	-0.266659	-0.606203	-0.266659	-0.606203	6	6	6	28.9947	29.5104	28.8314	28.1551	29.5029	28.8785						6	6	6	30	30	30	32.05	0	57.763	3330500000	24	5	6	4	3	5	5	5	6	4	3
tr|B2AUJ3|B2AUJ3_PODAN Podospora anserina S mat+ genomic DNA chromosome 1, supercontig 4 OS=Podospora anserina (strain S / ATCC MYA-4624 / DSM 980 / FGSC 10383) OX=515849 GN=PODANS_1_19320 PE=3 SV=1	B2AUJ3	B2AUJ3					0.87892	0.577216	0.964247	0.238662	-0.0525252	-0.606008	-0.0525252	-0.606008	8	8	8	28.9452	29.1165	29.1785	29.1157	28.9376	29.0293						8	8	8	16	16	16	76.313	0	70.64	3350200000	39	8	8	7	8	7	6	8	8	7	8
tr|B2B6D1|B2B6D1_PODAN Podospora anserina S mat+ genomic DNA chromosome 2, supercontig 2 OS=Podospora anserina (strain S / ATCC MYA-4624 / DSM 980 / FGSC 10383) OX=515849 GN=PODANS_2_7440 PE=4 SV=1	B2B6D1	B2B6D1					0.882306	0.583411	0.197436	0.234026	-2.34054	-0.595756	-2.34054	-0.595756	3	3	3	25.1702	26.0076	26.2038	15.6994	26.3763	28.2843						3	3	3	18.9	18.9	18.9	29.232	0	52.445	596520000	6	1	2	1	0	2	3	1	2	1	0
tr|B2AW76|B2AW76_PODAN Podospora anserina S mat+ genomic DNA chromosome 7, supercontig 1 OS=Podospora anserina (strain S / ATCC MYA-4624 / DSM 980 / FGSC 10383) OX=515849 GN=PODANS_7_6210 PE=4 SV=1	B2AW76	B2AW76					0.884568	0.58669	0.793379	0.231592	-0.333918	-0.590359	-0.333918	-0.590359	4	4	4	26.7304	26.9022	26.3242	25.2659	27.0469	26.6422						4	4	4	11	11	11	54.848	0	15.254	604510000	13	4	3	4	2	3	4	4	3	4	2
tr|B2AP32|B2AP32_PODAN Podospora anserina S mat+ genomic DNA chromosome 7, supercontig 3 OS=Podospora anserina (strain S / ATCC MYA-4624 / DSM 980 / FGSC 10383) OX=515849 GN=PODANS_7_710 PE=4 SV=1	B2AP32	B2AP32					0.886966	0.590446	0.940305	0.22882	-0.0887992	-0.5842	-0.0887992	-0.5842	1	1	1	25.2393	25.0318	25.2949	25.3581	24.9804	24.9612						1	1	1	3.1	3.1	3.1	51.588	0	21.233	223850000	4	1	1	1	1	1	1	1	1	1	1
tr|B2ARM6|B2ARM6_PODAN Podospora anserina S mat+ genomic DNA chromosome 4, supercontig 4 OS=Podospora anserina (strain S / ATCC MYA-4624 / DSM 980 / FGSC 10383) OX=515849 GN=PODANS_4_7010 PE=4 SV=1	B2ARM6	B2ARM6					0.886009	0.5906	0.872435	0.228707	-0.19688	-0.583949	-0.19688	-0.583949	4	4	4	28.5801	28.4737	29.1174	27.9889	28.7259	28.8658						4	4	4	15.4	15.4	15.4	38.753	0	39.654	2556000000	23	3	2	3	3	2	3	3	2	3	3
tr|A0A090D8W9|A0A090D8W9_PODAN Ubiquitin carboxyl-terminal hydrolase OS=Podospora anserina (strain S / ATCC MYA-4624 / DSM 980 / FGSC 10383) OX=515849 PE=3 SV=1	A0A090D8W9	A0A090D8W9					0.893269	0.602864	0.939283	0.219781	-0.0903676	-0.564019	-0.0903676	-0.564019	1	1	1	25.6397	25.8165	25.5512	25.3249	25.6036	25.8079						1	1	1	4.1	4.1	4.1	26.81	0.0014749	2.5146	312300000	5	1	1	1	1	1	1	1	1	1	1
tr|B2AMU9|B2AMU9_PODAN Podospora anserina S mat+ genomic DNA chromosome 5, supercontig 5 OS=Podospora anserina (strain S / ATCC MYA-4624 / DSM 980 / FGSC 10383) OX=515849 GN=PODANS_5_5230 PE=3 SV=1	B2AMU9	B2AMU9					0.893208	0.603304	0.838139	0.219464	-0.254738	-0.563308	-0.254738	-0.563308	5	5	5	26.5995	27.2225	26.7547	26.167	27.4269	26.2185						5	5	5	20.6	20.6	20.6	37.281	0	8.2815	705370000	6	2	5	2	3	5	2	2	5	2	3
tr|B2B6C7|B2B6C7_PODAN Podospora anserina S mat+ genomic DNA chromosome 2, supercontig 2 OS=Podospora anserina (strain S / ATCC MYA-4624 / DSM 980 / FGSC 10383) OX=515849 GN=PODANS_2_7400 PE=3 SV=1	B2B6C7	B2B6C7					0.892797	0.604584	0.241485	0.218543	-2.04999	-0.561243	-2.04999	-0.561243	3	3	3	25.0499	25.4722	24.2771	15.6994	25.4986	27.4512						3	3	3	5.8	5.8	5.8	56.385	0	19.158	332520000	4	2	2	2	0	3	3	2	2	2	0
tr|B2AP05|B2AP05_PODAN Podospora anserina S mat+ genomic DNA chromosome 7, supercontig 3 OS=Podospora anserina (strain S / ATCC MYA-4624 / DSM 980 / FGSC 10383) OX=515849 GN=PODANS_7_850 PE=4 SV=1	B2AP05	B2AP05					0.896731	0.609103	0.889504	0.21531	-0.168926	-0.553979	-0.168926	-0.553979	5	5	5	27.1896	26.9437	27.0301	26.3048	27.278	27.0739						5	5	5	14.3	14.3	14.3	44.599	0	12.914	806110000	6	4	4	5	4	4	4	4	4	5	4
tr|B2AEN6|B2AEN6_PODAN Podospora anserina S mat+ genomic DNA chromosome 5, supercontig 1 OS=Podospora anserina (strain S / ATCC MYA-4624 / DSM 980 / FGSC 10383) OX=515849 GN=PODANS_5_1990 PE=4 SV=1	B2AEN6	B2AEN6					0.897318	0.612211	0.712089	0.213099	-0.48987	-0.549001	-0.48987	-0.549001	11	9	8	31.8565	31.1598	31.8629	29.417	31.9083	32.0842						11	9	8	45.2	39.5	36.3	29.996	0	83.044	19512000000	88	11	11	11	10	10	11	9	9	9	8
tr|B2B7I4|B2B7I4_PODAN Podospora anserina S mat+ genomic DNA chromosome 2, supercontig 2 OS=Podospora anserina (strain S / ATCC MYA-4624 / DSM 980 / FGSC 10383) OX=515849 GN=PODANS_2_11220 PE=4 SV=1	B2B7I4	B2B7I4					0.90251	0.616376	0.933908	0.210155	-0.0986481	-0.542357	-0.0986481	-0.542357	1	1	1	22.0536	21.6002	21.76	21.5819	21.5814	21.9546						1	1	1	12	12	12	13.38	0	3.4836	21425000	1	1	1	1	1	1	1	1	1	1	1
tr|B2AYB4|B2AYB4_PODAN Podospora anserina S mat+ genomic DNA chromosome 1, supercontig 2 OS=Podospora anserina (strain S / ATCC MYA-4624 / DSM 980 / FGSC 10383) OX=515849 GN=PODANS_1_10540 PE=3 SV=1	B2AYB4	B2AYB4					0.910523	0.627131	0.935149	0.202641	-0.0967318	-0.525323	-0.0967318	-0.525323	27	27	27	35.8872	35.4549	35.4604	35.3816	35.7355	35.3952						27	27	27	65.8	65.8	65.8	47.645	0	323.31	307850000000	616	26	27	26	26	26	26	26	27	26	26
tr|B2AAL7|B2AAL7_PODAN Podospora anserina S mat+ genomic DNA chromosome 1, supercontig 1 OS=Podospora anserina (strain S / ATCC MYA-4624 / DSM 980 / FGSC 10383) OX=515849 GN=PODANS_1_4450 PE=4 SV=1	B2AAL7	B2AAL7					0.911087	0.629462	0.918954	0.201031	-0.121936	-0.521656	-0.121936	-0.521656	3	3	3	29.4561	29.9279	30.0358	29.4882	29.9826	29.5831						3	3	3	10.7	10.7	10.7	26.838	0	12.314	5498400000	51	3	3	3	3	3	3	3	3	3	3
tr|A0A090CHJ3|A0A090CHJ3_PODAN Putative argininosuccinate synthase OS=Podospora anserina (strain S / ATCC MYA-4624 / DSM 980 / FGSC 10383) OX=515849 PE=3 SV=1	A0A090CHJ3	A0A090CHJ3					0.910515	0.630084	0.951761	0.200601	-0.0713285	-0.520678	-0.0713285	-0.520678	15	15	15	33.5254	33.2478	33.2525	33.2415	33.4595	33.1108						15	15	15	45.4	45.4	45.4	46.459	0	204.67	64367000000	175	15	14	14	14	15	14	15	14	14	14
tr|B2AS95|B2AS95_PODAN Podospora anserina S mat+ genomic DNA chromosome 1, supercontig 6 OS=Podospora anserina (strain S / ATCC MYA-4624 / DSM 980 / FGSC 10383) OX=515849 GN=PODANS_1_22770 PE=4 SV=1	B2AS95	B2AS95					0.910317	0.630806	0.872291	0.200104	-0.197119	-0.519545	-0.197119	-0.519545	4	4	4	29.2462	29.3549	29.4819	28.4235	29.6166	29.4514						4	4	4	14.1	14.1	14.1	40.693	0	54.852	3990400000	17	2	2	3	1	2	3	2	2	3	1
tr|B2A9Q8|B2A9Q8_PODAN Podospora anserina S mat+ genomic DNA chromosome 1, supercontig 1 OS=Podospora anserina (strain S / ATCC MYA-4624 / DSM 980 / FGSC 10383) OX=515849 GN=PODANS_1_1460 PE=4 SV=1	B2A9Q8	B2A9Q8					0.910836	0.637519	0.942403	0.195507	-0.085584	-0.50904	-0.085584	-0.50904	1	1	1	27.1071	26.8578	27.4064	26.9914	26.9738	27.1494						1	1	1	4.5	4.5	4.5	27.407	0	3.4263	858150000	9	1	1	1	1	1	1	1	1	1	1
tr|B2B1R9|B2B1R9_PODAN Podospora anserina S mat+ genomic DNA chromosome 6, supercontig 2 OS=Podospora anserina (strain S / ATCC MYA-4624 / DSM 980 / FGSC 10383) OX=515849 GN=PODANS_6_4240 PE=4 SV=1	B2B1R9	B2B1R9					0.9111	0.640418	0.969284	0.193537	-0.0450083	-0.504524	-0.0450083	-0.504524	4	4	4	27.811	27.7931	27.9217	27.9363	27.794	27.6605						4	4	4	13.1	13.1	13.1	39.455	0	19.476	1424000000	19	4	4	4	3	4	3	4	4	4	3
tr|B2AF98|B2AF98_PODAN Podospora anserina S mat+ genomic DNA chromosome 5, supercontig 1 OS=Podospora anserina (strain S / ATCC MYA-4624 / DSM 980 / FGSC 10383) OX=515849 GN=PODANS_5_120 PE=4 SV=1	B2AF98	B2AF98					0.911852	0.642544	0.800066	0.192097	-0.321808	-0.501219	-0.321808	-0.501219	2	2	2	24.8389	25.5431	25.209	23.6588	25.5377	25.4291						2	2	2	4.5	4.5	4.5	43.416	0	4.3742	224820000	9	1	2	2	2	2	2	1	2	2	2
tr|A0A090CXG8|A0A090CXG8_PODAN Putative D-lactate dehydrogenase [cytochrome] 2, mitochondrial OS=Podospora anserina (strain S / ATCC MYA-4624 / DSM 980 / FGSC 10383) OX=515849 PE=4 SV=1	A0A090CXG8	A0A090CXG8					0.917777	0.650388	0.921499	0.186827	-0.117945	-0.489084	-0.117945	-0.489084	8	8	8	28.6605	27.8986	28.1661	28.1828	28.2441	27.9445						8	8	8	21.2	21.2	21.2	60.46	0	61.266	1856600000	25	7	5	7	5	5	6	7	5	7	5
tr|B2ADR0|B2ADR0_PODAN Podospora anserina S mat+ genomic DNA chromosome 4, supercontig 1 OS=Podospora anserina (strain S / ATCC MYA-4624 / DSM 980 / FGSC 10383) OX=515849 GN=PODANS_4_1790 PE=4 SV=1	B2ADR0	B2ADR0					0.918536	0.653632	0.714942	0.184667	-0.484102	-0.48409	-0.484102	-0.48409	4	4	4	27.2664	26.824	26.7259	27.8054	24.5347	27.0238						4	4	4	18	18	18	35.796	0	24.177	786540000	12	3	3	3	4	3	3	3	3	3	4
tr|B2B2G6|B2B2G6_PODAN Podospora anserina S mat+ genomic DNA chromosome 6, supercontig 2 OS=Podospora anserina (strain S / ATCC MYA-4624 / DSM 980 / FGSC 10383) OX=515849 GN=PODANS_6_3260 PE=4 SV=1	B2B2G6	B2B2G6					0.92035	0.657663	0.93671	0.181997	-0.0943254	-0.477905	-0.0943254	-0.477905	8	8	8	31.7572	31.7238	31.9966	31.3924	31.8093	31.993						8	8	8	40.5	40.5	40.5	31.27	0	204.85	22441000000	76	6	8	8	7	7	8	6	8	8	7
tr|A0A090DBY0|A0A090DBY0_PODAN Putative adenosine kinase OS=Podospora anserina (strain S / ATCC MYA-4624 / DSM 980 / FGSC 10383) OX=515849 PE=4 SV=1	A0A090DBY0	A0A090DBY0					0.921312	0.658787	0.94228	0.181255	-0.0857722	-0.476183	-0.0857722	-0.476183	12	12	12	33.4939	33.1967	33.1663	32.9065	33.3518	33.3412						12	12	12	54.4	54.4	54.4	38.374	0	216.5	61502000000	174	12	12	12	12	12	12	12	12	12	12
tr|B2AE72|B2AE72_PODAN Podospora anserina S mat+ genomic DNA chromosome 4, supercontig 2 OS=Podospora anserina (strain S / ATCC MYA-4624 / DSM 980 / FGSC 10383) OX=515849 GN=PODANS_4_3060 PE=4 SV=1	B2AE72	B2AE72					0.92203	0.661189	0.955488	0.179674	-0.065691	-0.472511	-0.065691	-0.472511	9	9	9	30.0758	29.6937	30.0252	29.9906	29.8602	29.7468						9	9	9	33	33	33	39.046	0	57.058	6035100000	45	7	7	7	9	8	7	7	7	7	9
tr|B2AWA7|B2AWA7_PODAN Podospora anserina S mat+ genomic DNA chromosome 7, supercontig 1 OS=Podospora anserina (strain S / ATCC MYA-4624 / DSM 980 / FGSC 10383) OX=515849 GN=PODANS_7_6520 PE=4 SV=1	B2AWA7	B2AWA7					0.921262	0.66206	0.622985	0.179103	-0.682731	-0.471182	-0.682731	-0.471182	3	3	3	25.7562	23.0628	25.9191	22.9708	23.267	26.4521						3	3	3	20.2	20.2	20.2	24.209	0	4.5814	239000000	6	2	3	2	2	2	2	2	3	2	2
tr|B2AXK2|B2AXK2_PODAN S-formylglutathione hydrolase OS=Podospora anserina (strain S / ATCC MYA-4624 / DSM 980 / FGSC 10383) OX=515849 GN=PODANS_7_10850 PE=3 SV=1	B2AXK2	B2AXK2					0.92057	0.662414	0.899342	0.17887	-0.153058	-0.47064	-0.153058	-0.47064	5	5	5	27.7529	27.9373	27.247	26.997	27.8132	27.6678						5	5	5	19.1	19.1	19.1	35.745	0	18.332	1225500000	9	3	3	3	2	4	4	3	3	3	2
tr|B2AC59|B2AC59_PODAN Podospora anserina S mat+ genomic DNA chromosome 2, supercontig 3 OS=Podospora anserina (strain S / ATCC MYA-4624 / DSM 980 / FGSC 10383) OX=515849 GN=PODANS_2_13600 PE=4 SV=1	B2AC59	B2AC59					0.920081	0.662782	0.934282	0.178629	-0.0980708	-0.470079	-0.0980708	-0.470079	18	18	18	32.7337	32.0427	32.3003	32.2494	32.359	32.1741						18	18	18	55.2	55.2	55.2	52.268	0	210.79	32320000000	153	18	15	16	15	17	16	18	15	16	15
tr|B2AW58|B2AW58_PODAN Podospora anserina S mat+ genomic DNA chromosome 7, supercontig 1 OS=Podospora anserina (strain S / ATCC MYA-4624 / DSM 980 / FGSC 10383) OX=515849 GN=PODANS_7_6030 PE=4 SV=1	B2AW58	B2AW58					0.924973	0.66988	0.772031	0.174003	-0.373269	-0.459286	-0.373269	-0.459286	5	5	5	27.6188	28.4737	28.7269	26.8186	27.5643	29.3166						5	5	5	29.9	29.9	29.9	16.477	0	33.259	2008600000	41	5	5	5	5	5	5	5	5	5	5
tr|B2B2C6|B2B2C6_PODAN Podospora anserina S mat+ genomic DNA chromosome 6, supercontig 2 OS=Podospora anserina (strain S / ATCC MYA-4624 / DSM 980 / FGSC 10383) OX=515849 GN=PODANS_6_3610 PE=4 SV=1	B2B2C6	B2B2C6					0.926754	0.673112	0.8912	0.171913	-0.166178	-0.454393	-0.166178	-0.454393	4	4	4	26.5647	27.1889	27.2166	26.2458	27.2343	26.9915						4	4	4	17.3	17.3	17.3	33.243	0	24.151	779110000	13	3	3	4	1	3	2	3	3	4	1
tr|B2AZN8|B2AZN8_PODAN Podospora anserina S mat+ genomic DNA chromosome 3, supercontig 2 OS=Podospora anserina (strain S / ATCC MYA-4624 / DSM 980 / FGSC 10383) OX=515849 GN=PODANS_3_5050 PE=4 SV=1	B2AZN8	B2AZN8					0.925352	0.673611	0.949155	0.171591	-0.075285	-0.453639	-0.075285	-0.453639	8	8	8	30.4135	30.5645	30.9475	30.4711	30.615	30.6135						8	8	8	37.9	37.9	37.9	23.53	0	70.539	9877200000	53	7	7	7	8	7	7	7	7	7	8
tr|B2B3D9|B2B3D9_PODAN Podospora anserina S mat+ genomic DNA chromosome 6, supercontig 2 OS=Podospora anserina (strain S / ATCC MYA-4624 / DSM 980 / FGSC 10383) OX=515849 GN=PODANS_6_320 PE=4 SV=1	B2B3D9	B2B3D9					0.924028	0.675873	0.936048	0.170135	-0.0953458	-0.450223	-0.0953458	-0.450223	4	4	4	28.7516	28.8924	28.7516	29.0843	28.6505	28.3747						4	4	4	28.3	28.3	28.3	16.41	0	56.57	2783400000	23	4	4	4	4	4	2	4	4	4	4
tr|B2AVP6|B2AVP6_PODAN Podospora anserina S mat+ genomic DNA chromosome 7, supercontig 1 OS=Podospora anserina (strain S / ATCC MYA-4624 / DSM 980 / FGSC 10383) OX=515849 GN=PODANS_7_2220 PE=4 SV=1	B2AVP6	B2AVP6					0.927792	0.688947	0.917947	0.161814	-0.123518	-0.430599	-0.123518	-0.430599	15	15	15	31.6723	30.922	30.9631	31.3608	30.9588	30.8673						15	15	15	35.9	35.9	35.9	59.578	0	134.33	14354000000	76	13	13	13	13	14	12	13	13	13	13
tr|B2AKT3|B2AKT3_PODAN Podospora anserina S mat+ genomic DNA chromosome 5, supercontig 9 OS=Podospora anserina (strain S / ATCC MYA-4624 / DSM 980 / FGSC 10383) OX=515849 GN=PODANS_5_8480 PE=3 SV=1	B2AKT3	B2AKT3					0.927081	0.689152	0.926413	0.161685	-0.110272	-0.430294	-0.110272	-0.430294	5	5	5	25.9066	25.098	25.7118	25.3151	25.4827	25.5879						5	5	5	12.1	12.1	12.1	57.097	0	24.411	292840000	15	4	4	3	5	3	3	4	4	3	5
tr|B2AMF7|B2AMF7_PODAN Podospora anserina S mat+ genomic DNA chromosome 5, supercontig 8 OS=Podospora anserina (strain S / ATCC MYA-4624 / DSM 980 / FGSC 10383) OX=515849 GN=PODANS_5_7220 PE=3 SV=1	B2AMF7	B2AMF7					0.926783	0.689845	0.871174	0.161248	-0.198967	-0.429259	-0.198967	-0.429259	1	1	1	26.8865	26.6123	25.7872	25.5995	26.6835	26.4061						1	1	1	11.8	11.8	11.8	20.278	0	23.551	532100000	10	1	1	1	1	1	1	1	1	1	1
tr|B2AAZ8|B2AAZ8_PODAN Podospora anserina S mat+ genomic DNA chromosome 1, supercontig 1 OS=Podospora anserina (strain S / ATCC MYA-4624 / DSM 980 / FGSC 10383) OX=515849 GN=PODANS_1_5690 PE=4 SV=1	B2AAZ8	B2AAZ8					0.924954	0.691231	0.965394	0.160377	-0.0508099	-0.427192	-0.0508099	-0.427192	4	4	4	28.1532	27.8419	27.813	27.8752	27.9727	27.8078						4	4	4	16.5	16.5	16.5	42.858	0	62.222	1519400000	28	4	4	4	4	3	4	4	4	4	4
sp|B2B3L4|MKAR_PODAN Very-long-chain 3-oxoacyl-CoA reductase OS=Podospora anserina (strain S / ATCC MYA-4624 / DSM 980 / FGSC 10383) OX=515849 GN=Pa_6_6580 PE=3 SV=2	B2B3L4	B2B3L4					0.924977	0.692087	0.908817	0.15984	-0.137939	-0.425917	-0.137939	-0.425917	5	5	5	27.7143	28.2065	28.4713	27.5853	27.9902	28.4028						5	5	5	15	15	15	37.416	0	19.472	1745700000	29	4	4	5	4	5	5	4	4	5	4
tr|B2AFG3|B2AFG3_PODAN Podospora anserina S mat+ genomic DNA chromosome 5, supercontig 3 OS=Podospora anserina (strain S / ATCC MYA-4624 / DSM 980 / FGSC 10383) OX=515849 GN=PODANS_5_12810 PE=4 SV=1	B2AFG3	B2AFG3					0.925967	0.693274	0.810962	0.159095	-0.302293	-0.424149	-0.302293	-0.424149	6	6	6	33.0393	33.6696	34.3083	32.1496	33.9174	34.0433						6	6	6	21.8	21.8	21.8	22.195	0	70.457	82995000000	164	6	6	6	6	6	6	6	6	6	6
tr|B2AU12|B2AU12_PODAN Podospora anserina S mat+ genomic DNA chromosome 1, supercontig 4 OS=Podospora anserina (strain S / ATCC MYA-4624 / DSM 980 / FGSC 10383) OX=515849 GN=PODANS_1_17630 PE=4 SV=1	B2AU12	B2AU12					0.924818	0.694232	0.956566	0.158495	-0.0640634	-0.422724	-0.0640634	-0.422724	9	9	9	31.3886	31.4743	31.8561	31.4139	31.57	31.543						9	9	9	38.8	38.8	38.8	26.297	0	186.06	18860000000	118	8	8	9	7	9	9	8	8	9	7
tr|B2AQQ1|B2AQQ1_PODAN Podospora anserina S mat+ genomic DNA chromosome 4, supercontig 4 OS=Podospora anserina (strain S / ATCC MYA-4624 / DSM 980 / FGSC 10383) OX=515849 GN=PODANS_4_3514 PE=4 SV=1	B2AQQ1	B2AQQ1					0.925596	0.697821	0.568783	0.156256	-0.814051	-0.417392	-0.814051	-0.417392	9	9	9	28.1094	27.9699	29.2212	23.8027	29.6526	29.403						9	9	9	34.2	34.2	34.2	25.744	0	26.075	2746800000	48	5	6	6	2	7	9	5	6	6	2
tr|B2ASI4|B2ASI4_PODAN Podospora anserina S mat+ genomic DNA chromosome 1, supercontig 6 OS=Podospora anserina (strain S / ATCC MYA-4624 / DSM 980 / FGSC 10383) OX=515849 GN=PODANS_1_23600 PE=4 SV=1	B2ASI4	B2ASI4					0.926128	0.700007	0.930183	0.154898	-0.104414	-0.414153	-0.104414	-0.414153	2	2	2	25.3	25.1225	25.8458	25.0872	25.5262	25.3418						2	2	2	14	14	14	14.171	0	3.441	264640000	8	1	1	1	2	1	1	1	1	1	2
tr|B2AT51|B2AT51_PODAN Podospora anserina S mat+ genomic DNA chromosome 1, supercontig 4 OS=Podospora anserina (strain S / ATCC MYA-4624 / DSM 980 / FGSC 10383) OX=515849 GN=PODANS_1_14690 PE=4 SV=1	B2AT51	B2AT51					0.92544	0.700056	0.331673	0.154867	-1.59217	-0.41408	-1.59217	-0.41408	3	3	3	24.1694	24.5018	26.0038	15.6994	26.8212	27.3779						3	3	3	24.2	24.2	24.2	17.273	0	13.933	402890000	22	2	2	2	0	2	3	2	2	2	0
tr|B2AU78|B2AU78_PODAN Proteasome subunit beta OS=Podospora anserina (strain S / ATCC MYA-4624 / DSM 980 / FGSC 10383) OX=515849 GN=PODANS_1_18220 PE=3 SV=1	B2AU78	B2AU78					0.928767	0.706901	0.961236	0.150642	-0.057038	-0.40397	-0.057038	-0.40397	4	4	4	28.0815	27.7448	27.6606	27.8309	27.6552	27.8297						4	4	4	35.3	35.3	35.3	30.682	0	16.845	1409800000	21	3	1	2	2	2	3	3	1	2	2
sp|B2AML6|MTNA_PODAN Methylthioribose-1-phosphate isomerase OS=Podospora anserina (strain S / ATCC MYA-4624 / DSM 980 / FGSC 10383) OX=515849 GN=MRI1 PE=3 SV=2	B2AML6	B2AML6					0.93167	0.711993	0.929962	0.147524	-0.104757	-0.39648	-0.104757	-0.39648	5	5	5	28.0583	28.2114	28.3236	27.5875	28.3514	28.3402						5	5	5	18.7	18.7	18.7	42.785	0	38.3	1810200000	28	5	5	5	4	3	5	5	5	5	4
tr|B2AKU1|B2AKU1_PODAN Histone chaperone OS=Podospora anserina (strain S / ATCC MYA-4624 / DSM 980 / FGSC 10383) OX=515849 GN=PODANS_5_8890 PE=3 SV=1	B2AKU1	B2AKU1					0.931517	0.712792	0.410855	0.147037	-1.2833	-0.395307	-1.2833	-0.395307	1	1	1	22.3493	24.0813	23.7319	25.4118	25.2014	15.6994						1	1	1	5.7	5.7	5.7	30.808	0	22.122	120240000	3	1	1	1	1	1	0	1	1	1	1
tr|B2AQD1|B2AQD1_PODAN Podospora anserina S mat+ genomic DNA chromosome 4, supercontig 4 OS=Podospora anserina (strain S / ATCC MYA-4624 / DSM 980 / FGSC 10383) OX=515849 GN=PODANS_4_4550 PE=3 SV=1	B2AQD1	B2AQD1					0.932115	0.714509	0.941747	0.145992	-0.0865885	-0.392789	-0.0865885	-0.392789	7	7	7	29.8566	29.5297	29.7406	29.228	29.8606	29.7785						7	7	7	20.8	20.8	20.8	51.243	0	78.482	5168800000	36	6	7	6	5	7	6	6	7	6	5
tr|B2APQ7|B2APQ7_PODAN Podospora anserina S mat+ genomic DNA chromosome 5, supercontig 10 OS=Podospora anserina (strain S / ATCC MYA-4624 / DSM 980 / FGSC 10383) OX=515849 GN=PODANS_5_11195 PE=4 SV=1	B2APQ7	B2APQ7					0.932176	0.715028	0.889447	0.145677	-0.169019	-0.392028	-0.169019	-0.392028	2	2	2	26.3373	26.1076	25.7425	26.1468	26.4144	25.119						2	2	2	25.8	25.8	25.8	10.467	0	4.5232	413900000	12	1	1	1	1	2	1	1	1	1	1
tr|B2B6B1|B2B6B1_PODAN Podospora anserina S mat+ genomic DNA chromosome 2, supercontig 2 OS=Podospora anserina (strain S / ATCC MYA-4624 / DSM 980 / FGSC 10383) OX=515849 GN=PODANS_2_7240 PE=4 SV=1	B2B6B1	B2B6B1					0.931847	0.715294	0.833416	0.145515	-0.262891	-0.391638	-0.262891	-0.391638	22	22	20	34.7524	34.446	35.0531	33.2308	34.8424	35.3897						22	22	20	88.9	88.9	86.4	29.228	0	323.31	178060000000	315	20	20	20	20	21	21	20	20	20	20
tr|B2B7F3|B2B7F3_PODAN Podospora anserina S mat+ genomic DNA chromosome 2, supercontig 2 OS=Podospora anserina (strain S / ATCC MYA-4624 / DSM 980 / FGSC 10383) OX=515849 GN=PODANS_2_10910 PE=3 SV=1	B2B7F3	B2B7F3					0.93073	0.717254	0.943814	0.144327	-0.0834255	-0.38877	-0.0834255	-0.38877	9	9	9	30.3584	30.3766	30.4578	29.9035	30.4251	30.6138						9	9	9	27.2	27.2	27.2	44.694	0	100.71	8334400000	70	8	7	7	7	8	7	8	7	7	7
tr|B2AFT0|B2AFT0_PODAN Podospora anserina S mat+ genomic DNA chromosome 5, supercontig 7 OS=Podospora anserina (strain S / ATCC MYA-4624 / DSM 980 / FGSC 10383) OX=515849 GN=PODANS_5_12510 PE=3 SV=1	B2AFT0	B2AFT0					0.930019	0.717353	0.918671	0.144267	-0.122379	-0.388625	-0.122379	-0.388625	7	7	7	29.2949	29.3938	29.5941	28.7032	29.5572	29.6553						7	7	7	21.1	21.1	21.1	52.032	0	27.146	4247000000	43	6	6	6	6	6	7	6	6	6	6
tr|B2AZ07|B2AZ07_PODAN Peptidylprolyl isomerase OS=Podospora anserina (strain S / ATCC MYA-4624 / DSM 980 / FGSC 10383) OX=515849 GN=PODANS_3_3700 PE=4 SV=1	B2AZ07	B2AZ07					0.929975	0.71804	0.821307	0.143852	-0.284006	-0.38762	-0.284006	-0.38762	5	5	5	28.7064	29.3992	29.8433	27.7261	29.6338	29.7369						5	5	5	48	48	48	16.112	0	37.936	4059000000	36	5	5	5	5	5	5	5	5	5	5
tr|A0A090CV89|A0A090CV89_PODAN Putative Golgi apparatus membrane protein TVP15 OS=Podospora anserina (strain S / ATCC MYA-4624 / DSM 980 / FGSC 10383) OX=515849 PE=4 SV=1	A0A090CV89	A0A090CV89					0.929091	0.718197	0.813828	0.143756	-0.297204	-0.38739	-0.297204	-0.38739	2	2	2	24.3438	23.3761	24.4372	22.4169	24.1461	24.7025						2	2	2	14.6	14.6	14.6	13.98	0	4.368	123200000	12	2	2	2	2	2	2	2	2	2	2
tr|B2B063|B2B063_PODAN Podospora anserina S mat+ genomic DNA chromosome 3, supercontig 2 OS=Podospora anserina (strain S / ATCC MYA-4624 / DSM 980 / FGSC 10383) OX=515849 GN=PODANS_3_6440 PE=3 SV=1	B2B063	B2B063					0.930051	0.720226	0.945308	0.142531	-0.0811443	-0.384426	-0.0811443	-0.384426	2	2	2	27.5044	26.8321	26.9917	27.1447	26.9598	26.9802						2	2	2	8.3	8.3	8.3	38.838	0	7.1147	854600000	8	2	2	2	2	2	1	2	2	2	2
tr|A0A090CHF6|A0A090CHF6_PODAN Putative transitional endoplasmic reticulum ATPase OS=Podospora anserina (strain S / ATCC MYA-4624 / DSM 980 / FGSC 10383) OX=515849 PE=4 SV=1	A0A090CHF6	A0A090CHF6					0.928561	0.721099	0.914583	0.142005	-0.128813	-0.383152	-0.128813	-0.383152	3	3	3	27.8833	27.4605	26.8204	27.216	27.5075	27.0543						3	3	3	5.3	5.3	5.3	58.002	0	5.7577	1036800000	10	3	2	2	3	3	3	3	2	2	3
tr|A0A090CJE5|A0A090CJE5_PODAN Uncharacterized protein OS=Podospora anserina (strain S / ATCC MYA-4624 / DSM 980 / FGSC 10383) OX=515849 PE=4 SV=1	A0A090CJE5	A0A090CJE5					0.927519	0.721867	0.721556	0.141543	-0.470817	-0.382031	-0.470817	-0.382031	8	8	8	28.1578	28.2051	29.0658	25.6191	29.0429	29.3543						8	8	8	20.2	20.2	20.2	56.056	0	36.724	2461800000	19	7	8	8	3	7	8	7	8	8	3
tr|B2B115|B2B115_PODAN Podospora anserina S mat+ genomic DNA chromosome 3, supercontig 2 OS=Podospora anserina (strain S / ATCC MYA-4624 / DSM 980 / FGSC 10383) OX=515849 GN=PODANS_3_8020 PE=4 SV=1	B2B115	B2B115					0.930313	0.726314	0.981403	0.138875	-0.0270824	-0.375556	-0.0270824	-0.375556	9	9	9	30.3004	30.3795	30.4822	30.318	30.4586	30.3043						9	9	9	28.1	28.1	28.1	47.701	0	181.9	8358800000	68	7	9	9	9	9	9	7	9	9	9
tr|B2ALP2|B2ALP2_PODAN Podospora anserina S mat+ genomic DNA chromosome 5, supercontig 4 OS=Podospora anserina (strain S / ATCC MYA-4624 / DSM 980 / FGSC 10383) OX=515849 GN=PODANS_5_4220 PE=4 SV=1	B2ALP2	B2ALP2					0.929441	0.728116	0.977857	0.137799	-0.0323041	-0.372937	-0.0323041	-0.372937	3	3	3	27.2562	27.121	27.2069	27.2122	27.0112	27.2639						3	3	3	11.3	11.3	11.3	34.928	0	41.68	913070000	21	3	3	3	3	2	3	3	3	3	3
tr|B2B197|B2B197_PODAN Podospora anserina S mat+ genomic DNA chromosome 3, supercontig 2 OS=Podospora anserina (strain S / ATCC MYA-4624 / DSM 980 / FGSC 10383) OX=515849 GN=PODANS_3_9770 PE=3 SV=1	B2B197	B2B197					0.928765	0.729157	0.973129	0.137179	-0.0392965	-0.371426	-0.0392965	-0.371426	5	5	5	29.811	29.4799	29.5535	29.6111	29.5085	29.6069						5	5	5	13.6	13.6	13.6	45.835	0	27.426	4880000000	48	4	4	4	5	3	4	4	4	4	5
tr|A0A090CD32|A0A090CD32_PODAN Uncharacterized protein OS=Podospora anserina (strain S / ATCC MYA-4624 / DSM 980 / FGSC 10383) OX=515849 PE=4 SV=1	A0A090CD32	A0A090CD32					0.927996	0.72951	0.807819	0.136969	-0.307896	-0.370914	-0.307896	-0.370914	6	6	6	29.6912	29.3806	30.4883	28.0434	30.5171	30.0758						6	6	6	54.6	54.6	54.6	14.701	0	60.725	6016900000	73	6	5	6	5	6	5	6	5	6	5
tr|B2B6R5|B2B6R5_PODAN Podospora anserina S mat+ genomic DNA chromosome 2, supercontig 2 OS=Podospora anserina (strain S / ATCC MYA-4624 / DSM 980 / FGSC 10383) OX=515849 GN=PODANS_2_8600 PE=4 SV=1	B2B6R5	B2B6R5					0.928554	0.730898	0.946592	0.136143	-0.0791861	-0.368901	-0.0791861	-0.368901	2	2	2	25.4134	26.1072	25.9029	25.8364	25.7237	25.6258						2	2	2	18.6	18.6	18.6	18.428	0	40.93	346820000	5	2	2	2	2	2	2	2	2	2	2
tr|B2AYA1|B2AYA1_PODAN Podospora anserina S mat+ genomic DNA chromosome 1, supercontig 2 OS=Podospora anserina (strain S / ATCC MYA-4624 / DSM 980 / FGSC 10383) OX=515849 GN=PODANS_1_10390 PE=4 SV=1	B2AYA1	B2AYA1					0.927888	0.731001	0.914355	0.136082	-0.129174	-0.368752	-0.129174	-0.368752	1	1	1	26.7196	25.9054	26.572	26.7479	26.123	25.9386						1	1	1	2.8	2.8	2.8	53.17	0	33.821	523210000	12	1	1	1	1	1	1	1	1	1	1
tr|B2AD47|B2AD47_PODAN Podospora anserina S mat+ genomic DNA chromosome 4, supercontig 1 OS=Podospora anserina (strain S / ATCC MYA-4624 / DSM 980 / FGSC 10383) OX=515849 GN=PODANS_4_60 PE=4 SV=1	B2AD47	B2AD47					0.928011	0.733498	0.91559	0.134601	-0.127227	-0.365135	-0.127227	-0.365135	5	5	5	29.4598	29.7962	29.432	28.801	29.8985	29.6069						5	5	5	14.4	14.4	14.4	44.8	0	21.757	4725500000	28	2	5	5	3	4	4	2	5	5	3
tr|B2B038|B2B038_PODAN Podospora anserina S mat+ genomic DNA chromosome 3, supercontig 2 OS=Podospora anserina (strain S / ATCC MYA-4624 / DSM 980 / FGSC 10383) OX=515849 GN=PODANS_3_6190 PE=4 SV=1	B2B038	B2B038					0.931925	0.737626	0.976569	0.132164	-0.0342064	-0.359169	-0.0342064	-0.359169	5	5	5	27.7315	27.9815	27.9458	27.9357	27.8709	27.7496						5	5	5	22.8	22.8	22.8	31.901	0	30.972	1474300000	30	4	4	5	4	5	4	4	4	5	4
tr|B2ARR1|B2ARR1_PODAN S-methyl-5-thioadenosine phosphorylase OS=Podospora anserina (strain S / ATCC MYA-4624 / DSM 980 / FGSC 10383) OX=515849 GN=PODANS_4_6660 PE=3 SV=1	B2ARR1	B2ARR1					0.93181	0.738655	0.941113	0.131558	-0.0875607	-0.357684	-0.0875607	-0.357684	6	6	6	30.5153	29.8067	29.7641	29.8932	29.9598	29.9705						6	6	6	24.4	24.4	24.4	33.586	0	100.37	6565300000	57	5	4	5	5	5	5	5	4	5	5
tr|A0A090CH09|A0A090CH09_PODAN Putative mitochondrial hydroxymethylglutaryl-CoA lyase OS=Podospora anserina (strain S / ATCC MYA-4624 / DSM 980 / FGSC 10383) OX=515849 PE=4 SV=1	A0A090CH09	A0A090CH09	HMGCL				0.932175	0.742294	0.988401	0.129424	-0.0168317	-0.352441	-0.0168317	-0.352441	5	5	5	29.3429	29.3977	29.2947	29.2575	29.3844	29.3428						5	5	5	17.6	17.6	17.6	39.052	0	73.591	4070200000	32	4	4	5	4	4	4	4	4	5	4
tr|B2B6A8|B2B6A8_PODAN Podospora anserina S mat+ genomic DNA chromosome 2, supercontig 2 OS=Podospora anserina (strain S / ATCC MYA-4624 / DSM 980 / FGSC 10383) OX=515849 GN=PODANS_2_7210 PE=4 SV=1	B2B6A8	B2B6A8					0.931512	0.746351	0.696891	0.127057	-0.520994	-0.346608	-0.520994	-0.346608	4	4	4	27.4253	25.7775	27.4458	23.7264	26.8721	28.4872						4	4	4	19.6	19.6	19.6	37.263	0	25.362	933560000	13	3	3	4	1	4	4	3	3	4	1
tr|B2AVQ2|B2AVQ2_PODAN Podospora anserina S mat+ genomic DNA chromosome 7, supercontig 1 OS=Podospora anserina (strain S / ATCC MYA-4624 / DSM 980 / FGSC 10383) OX=515849 GN=PODANS_7_2170 PE=3 SV=1	B2AVQ2	B2AVQ2					0.931959	0.748645	0.945294	0.125724	-0.0811653	-0.343318	-0.0811653	-0.343318	3	3	3	31.5294	31.5186	32.0526	31.817	31.7325	31.3076						3	3	3	25	25	25	17.625	0	76.779	20640000000	54	2	2	3	2	2	2	2	2	3	2
tr|B2AZ34|B2AZ34_PODAN Mitochondrial fission 1 protein OS=Podospora anserina (strain S / ATCC MYA-4624 / DSM 980 / FGSC 10383) OX=515849 GN=PODANS_3_3970 PE=3 SV=1	B2AZ34	B2AZ34					0.931705	0.749258	0.825782	0.125369	-0.276168	-0.342439	-0.276168	-0.342439	3	3	3	24.5367	25.7523	25.7906	23.7081	25.9245	25.6185						3	3	3	20.9	20.9	20.9	16.986	0	8.9943	267810000	13	2	3	2	2	3	2	2	3	2	2
tr|B2B7Z4|B2B7Z4_PODAN Podospora anserina S mat+ genomic DNA chromosome 2, supercontig 2 OS=Podospora anserina (strain S / ATCC MYA-4624 / DSM 980 / FGSC 10383) OX=515849 GN=PODANS_2_12760 PE=4 SV=1	B2B7Z4	B2B7Z4					0.931735	0.750016	0.953684	0.124929	-0.0684166	-0.341352	-0.0684166	-0.341352	8	8	8	29.8728	29.8176	30.0727	29.5356	29.8464	30.1758						8	8	8	38.4	38.4	38.4	30.275	0	96.89	6015000000	48	6	7	8	7	6	7	6	7	8	7
tr|A0A090D5G1|A0A090D5G1_PODAN Putative lipase/esterase involved in aflatoxin biosynthesis orthologous to A. nidulans stcI, member of the aflatoxin cluster OS=Podospora anserina (strain S / ATCC MYA-4624 / DSM 980 / FGSC 10383) OX=515849 PE=4 SV=1	A0A090D5G1	A0A090D5G1					0.933043	0.753474	0.780645	0.122932	-0.357262	-0.336404	-0.357262	-0.336404	9	9	9	30.2674	29.4831	30.1568	27.6131	30.1561	31.0663						9	9	9	49.8	49.8	49.8	35.243	0	183.35	6890100000	43	8	7	9	5	9	9	8	7	9	5
tr|A0A090CQ94|A0A090CQ94_PODAN Homoserine dehydrogenase OS=Podospora anserina (strain S / ATCC MYA-4624 / DSM 980 / FGSC 10383) OX=515849 PE=3 SV=1	A0A090CQ94	A0A090CQ94					0.932436	0.755656	0.969015	0.121676	-0.0454089	-0.333286	-0.0454089	-0.333286	8	8	8	30.1651	30.3127	30.2912	30.4013	30.2645	29.9669						8	8	8	32.6	32.6	32.6	38.577	0	34.361	7608600000	53	8	7	7	7	8	7	8	7	7	7
tr|B2B1Y2|B2B1Y2_PODAN Serine/threonine-protein phosphatase OS=Podospora anserina (strain S / ATCC MYA-4624 / DSM 980 / FGSC 10383) OX=515849 GN=PODANS_6_4830 PE=3 SV=1	B2B1Y2	B2B1Y2					0.932472	0.756596	0.91088	0.121136	-0.134667	-0.331944	-0.134667	-0.331944	2	2	2	26.4123	25.4639	25.3275	25.2509	26.0052	25.5435						2	2	2	7.7	7.7	7.7	43.378	0	5.2796	333880000	5	2	1	1	1	1	1	2	1	1	1
tr|B2AYQ9|B2AYQ9_PODAN Podospora anserina S mat+ genomic DNA chromosome 1, supercontig 2 OS=Podospora anserina (strain S / ATCC MYA-4624 / DSM 980 / FGSC 10383) OX=515849 GN=PODANS_1_11920 PE=4 SV=1	B2AYQ9	B2AYQ9					0.932044	0.757024	0.968189	0.12089	-0.0466391	-0.331333	-0.0466391	-0.331333	4	4	4	27.3417	26.9283	26.9977	27.1136	26.9256	27.0886						4	4	4	14.1	14.1	14.1	35.106	0	18.969	847190000	12	2	2	4	3	3	3	2	2	4	3
tr|B2ABD2|B2ABD2_PODAN Serine/threonine-protein phosphatase (Fragment) OS=Podospora anserina (strain S / ATCC MYA-4624 / DSM 980 / FGSC 10383) OX=515849 GN=PODANS_1_6920 PE=3 SV=1	B2ABD2	B2ABD2					0.932194	0.757945	0.948855	0.120362	-0.0757402	-0.33002	-0.0757402	-0.33002	2	2	2	26.1456	25.4732	25.5342	25.7383	25.7068	25.4807						2	2	2	5.3	5.3	5.3	57.549	0	9.621	326970000	6	2	2	2	2	2	2	2	2	2	2
tr|B2B736|B2B736_PODAN Podospora anserina S mat+ genomic DNA chromosome 2, supercontig 2 OS=Podospora anserina (strain S / ATCC MYA-4624 / DSM 980 / FGSC 10383) OX=515849 GN=PODANS_2_9780 PE=4 SV=1	B2B736	B2B736					0.931985	0.758646	0.962299	0.119961	-0.0554428	-0.32902	-0.0554428	-0.32902	13	13	13	32.8347	32.682	33.1275	32.6182	32.8905	32.9692						13	13	13	56	56	56	30.006	0	198.18	46904000000	173	13	13	13	13	13	13	13	13	13	13
tr|B2AFM2|B2AFM2_PODAN Podospora anserina S mat+ genomic DNA chromosome 5, supercontig 7 OS=Podospora anserina (strain S / ATCC MYA-4624 / DSM 980 / FGSC 10383) OX=515849 GN=PODANS_5_12000 PE=4 SV=1	B2AFM2	B2AFM2					0.933885	0.761631	0.872692	0.118255	-0.196456	-0.324769	-0.196456	-0.324769	4	4	4	28.4144	28.4144	27.3862	28.3365	28.41	26.8792						4	4	4	18.3	18.3	18.3	34.339	0	52.975	1710000000	31	4	4	4	4	4	3	4	4	4	4
tr|B2AUD4|B2AUD4_PODAN Podospora anserina S mat+ genomic DNA chromosome 1, supercontig 4 OS=Podospora anserina (strain S / ATCC MYA-4624 / DSM 980 / FGSC 10383) OX=515849 GN=PODANS_1_18760 PE=4 SV=1	B2AUD4	B2AUD4					0.934058	0.762848	0.970482	0.117562	-0.0432262	-0.323039	-0.0432262	-0.323039	6	6	6	28.4975	28.657	28.8224	28.6002	28.4588	28.7883						6	6	6	32.6	32.6	32.6	30.834	0	87.387	2516400000	33	4	5	5	5	6	4	4	5	5	5
sp|B2AWZ9|ENOPH_PODAN Enolase-phosphatase E1 OS=Podospora anserina (strain S / ATCC MYA-4624 / DSM 980 / FGSC 10383) OX=515849 GN=UTR4 PE=3 SV=1	B2AWZ9	B2AWZ9					0.933707	0.763673	0.953664	0.117093	-0.0684465	-0.321866	-0.0684465	-0.321866	4	4	4	27.7144	28.127	28.4419	27.9815	28.081	28.0154						4	4	4	24.8	24.8	24.8	25.91	0	23.859	1698300000	27	3	3	3	3	3	4	3	3	3	3
tr|B2AMF8|B2AMF8_PODAN Podospora anserina S mat+ genomic DNA chromosome 5, supercontig 8 OS=Podospora anserina (strain S / ATCC MYA-4624 / DSM 980 / FGSC 10383) OX=515849 GN=PODANS_5_7230 PE=4 SV=1	B2AMF8	B2AMF8					0.941775	0.771464	0.531694	0.112685	-0.911332	-0.310816	-0.911332	-0.310816	1	1	1	20.5176	23.052	22.8489	23.0532	24.9319	15.6994						1	1	1	5.3	5.3	5.3	31.938	0	5.1213	58462000	1	1	1	1	1	1	0	1	1	1	1
tr|B2AD55|B2AD55_PODAN Podospora anserina S mat+ genomic DNA chromosome 4, supercontig 1 OS=Podospora anserina (strain S / ATCC MYA-4624 / DSM 980 / FGSC 10383) OX=515849 GN=PODANS_4_130 PE=3 SV=1	B2AD55	B2AD55					0.941102	0.771609	0.951389	0.112603	-0.0718924	-0.310611	-0.0718924	-0.310611	16	16	16	31.6706	30.9839	31.0652	31.3225	31.1353	31.0461						16	16	16	46.7	46.7	46.7	51.21	0	188.95	15050000000	102	14	15	14	13	13	12	14	15	14	13
tr|A0A090CX11|A0A090CX11_PODAN Putative pH-response transcription factor pacC/RIM101 OS=Podospora anserina (strain S / ATCC MYA-4624 / DSM 980 / FGSC 10383) OX=515849 PE=4 SV=1	A0A090CX11	A0A090CX11					0.942995	0.777117	0.919083	0.109513	-0.121733	-0.302826	-0.121733	-0.302826	1	1	1	25.7898	24.5198	25.5487	25.3583	25.0273	25.1076						1	1	1	1.5	1.5	1.5	63.683	0.0076602	1.742	244510000	7	1	1	1	1	1	1	1	1	1	1
tr|B2B5X0|B2B5X0_PODAN Glutamate dehydrogenase OS=Podospora anserina (strain S / ATCC MYA-4624 / DSM 980 / FGSC 10383) OX=515849 GN=PODANS_2_6020 PE=3 SV=1	B2B5X0	B2B5X0					0.94316	0.779909	0.918556	0.107956	-0.12256	-0.298889	-0.12256	-0.298889	14	14	14	31.2823	30.4738	30.9074	31.4221	30.5681	30.3057						14	14	14	43.8	43.8	43.8	51.684	0	157.44	11913000000	89	13	14	14	14	13	13	13	14	14	14
tr|B2AR95|B2AR95_PODAN Podospora anserina S mat+ genomic DNA chromosome 4, supercontig 4 OS=Podospora anserina (strain S / ATCC MYA-4624 / DSM 980 / FGSC 10383) OX=515849 GN=PODANS_4_8210 PE=4 SV=1	B2AR95	B2AR95					0.942393	0.780032	0.939755	0.107887	-0.0896428	-0.298716	-0.0896428	-0.298716	1	1	1	23.0635	22.5998	23.5978	23.1262	23.0243	22.8416						1	1	1	4.1	4.1	4.1	36.297	0.0043384	2.2179	53020000	1	1	1	1	1	1	1	1	1	1	1
tr|B2AUG8|B2AUG8_PODAN Podospora anserina S mat+ genomic DNA chromosome 1, supercontig 4 OS=Podospora anserina (strain S / ATCC MYA-4624 / DSM 980 / FGSC 10383) OX=515849 GN=PODANS_1_19070 PE=4 SV=1	B2AUG8	B2AUG8					0.941642	0.780105	0.888975	0.107847	-0.169786	-0.298614	-0.169786	-0.298614	2	2	2	28.5054	28.6199	27.3432	27.1954	28.3402	28.4235						2	2	2	10.5	10.5	10.5	21.92	0	7.7277	1817400000	21	2	2	2	2	2	2	2	2	2	2
tr|B2AB95|B2AB95_PODAN Podospora anserina S mat+ genomic DNA chromosome 1, supercontig 1 OS=Podospora anserina (strain S / ATCC MYA-4624 / DSM 980 / FGSC 10383) OX=515849 GN=PODANS_1_6570 PE=4 SV=1	B2AB95	B2AB95					0.945006	0.785688	0.878435	0.10475	-0.186992	-0.290759	-0.186992	-0.290759	3	3	3	25.5669	25.0178	26.3194	24.4303	25.7631	26.1497						3	3	3	10.3	10.3	10.3	55.001	0	18.363	321420000	9	3	3	2	3	3	2	3	3	2	3
tr|B2B487|B2B487_PODAN Podospora anserina S mat+ genomic DNA chromosome 2, supercontig 2 OS=Podospora anserina (strain S / ATCC MYA-4624 / DSM 980 / FGSC 10383) OX=515849 GN=PODANS_2_430 PE=3 SV=1	B2B487	B2B487					0.946789	0.789824	0.923387	0.10247	-0.114992	-0.284955	-0.114992	-0.284955	2	2	2	26.9372	27.2522	26.5126	26.3342	27.4563	26.5665						2	2	2	3.7	3.7	3.7	65.093	0	18.344	752250000	14	2	2	2	2	2	2	2	2	2	2
tr|B2B548|B2B548_PODAN Podospora anserina S mat+ genomic DNA chromosome 2, supercontig 2 OS=Podospora anserina (strain S / ATCC MYA-4624 / DSM 980 / FGSC 10383) OX=515849 GN=PODANS_2_3480 PE=4 SV=1	B2B548	B2B548					0.945302	0.790211	0.945985	0.102257	-0.0801112	-0.284412	-0.0801112	-0.284412	5	5	5	27.2859	27.6538	27.7963	27.1267	27.4297	27.9394						5	5	5	32.7	32.7	32.7	23.005	0	15.554	1192600000	25	4	4	5	4	5	4	4	4	5	4
tr|B2B5G9|B2B5G9_PODAN Podospora anserina S mat+ genomic DNA chromosome 2, supercontig 2 OS=Podospora anserina (strain S / ATCC MYA-4624 / DSM 980 / FGSC 10383) OX=515849 GN=PODANS_2_4640 PE=4 SV=1	B2B5G9	B2B5G9					0.948563	0.796796	0.880729	0.0986528	-0.18323	-0.275196	-0.18323	-0.275196	1	1	1	22.4065	24.4794	22.9953	23.0101	22.7349	23.5866						1	1	1	2.8	2.8	2.8	43.25	0	3.9888	65336000	15	1	1	1	1	1	1	1	1	1	1
tr|B2ADB9|B2ADB9_PODAN Serine hydroxymethyltransferase OS=Podospora anserina (strain S / ATCC MYA-4624 / DSM 980 / FGSC 10383) OX=515849 GN=PODANS_4_660 PE=3 SV=1	B2ADB9	B2ADB9					0.946142	0.802308	0.958877	0.0956588	-0.0605818	-0.267503	-0.0605818	-0.267503	10	9	9	31.1481	30.485	30.9535	30.5883	30.9679	30.8486						10	9	9	25.2	23.5	23.5	59.508	0	131.43	11633000000	64	10	10	10	10	10	10	9	9	9	9
tr|B2ADC3|B2ADC3_PODAN Podospora anserina S mat+ genomic DNA chromosome 4, supercontig 1 OS=Podospora anserina (strain S / ATCC MYA-4624 / DSM 980 / FGSC 10383) OX=515849 GN=PODANS_4_700 PE=4 SV=1	B2ADC3	B2ADC3					0.946416	0.803189	0.965532	0.0951823	-0.0506045	-0.266276	-0.0506045	-0.266276	18	18	18	34.048	33.6357	33.6245	33.9577	33.6849	33.5138						18	18	18	62	62	62	35.007	0	323.31	87115000000	244	18	17	18	18	16	17	18	17	18	18
tr|B2ATX6|B2ATX6_PODAN Podospora anserina S mat+ genomic DNA chromosome 1, supercontig 4 OS=Podospora anserina (strain S / ATCC MYA-4624 / DSM 980 / FGSC 10383) OX=515849 GN=PODANS_1_17280 PE=4 SV=1	B2ATX6	B2ATX6					0.945333	0.80468	0.966524	0.0943766	-0.0491231	-0.264199	-0.0491231	-0.264199	17	17	17	32.9236	32.311	32.517	32.6205	32.5236	32.4602						17	17	17	44.4	44.4	44.4	61.84	0	323.31	38374000000	173	16	16	17	17	16	16	16	16	17	17
tr|B2AP26|B2AP26_PODAN Podospora anserina S mat+ genomic DNA chromosome 7, supercontig 3 OS=Podospora anserina (strain S / ATCC MYA-4624 / DSM 980 / FGSC 10383) OX=515849 GN=PODANS_7_1530 PE=4 SV=1	B2AP26	B2AP26					0.948853	0.811681	0.947265	0.0906145	-0.0781593	-0.254467	-0.0781593	-0.254467	4	4	4	27.8526	28.1984	28.4103	27.5868	28.4768	28.1633						4	4	4	49.5	49.5	49.5	10.993	0	16.239	1782800000	29	4	4	4	3	4	4	4	4	4	3
tr|A0A090CXH1|A0A090CXH1_PODAN Uncharacterized protein OS=Podospora anserina (strain S / ATCC MYA-4624 / DSM 980 / FGSC 10383) OX=515849 PE=3 SV=1	A0A090CXH1	A0A090CXH1					0.950116	0.812973	0.987238	0.0899241	-0.0185305	-0.252675	-0.0185305	-0.252675	18	18	18	33.2053	33.2788	33.32	33.2855	33.34	33.1229						18	18	18	71.3	71.3	71.3	27.029	0	323.31	62627000000	254	17	18	18	18	18	18	17	18	18	18
tr|B2AKU7|B2AKU7_PODAN Podospora anserina S mat+ genomic DNA chromosome 5, supercontig 9 OS=Podospora anserina (strain S / ATCC MYA-4624 / DSM 980 / FGSC 10383) OX=515849 GN=PODANS_5_8950 PE=4 SV=1	B2AKU7	B2AKU7					0.949283	0.812988	0.942795	0.0899158	-0.0849845	-0.252654	-0.0849845	-0.252654	2	2	2	24.2099	23.8874	24.0289	24.5847	23.7769	23.5097						2	2	2	13.5	13.5	13.5	14.579	0	3.3175	103520000	2	2	1	1	1	1	1	2	1	1	1
tr|B2AY56|B2AY56_PODAN Obg-like ATPase 1 OS=Podospora anserina (strain S / ATCC MYA-4624 / DSM 980 / FGSC 10383) OX=515849 GN=PODANS_1_9940 PE=3 SV=1	B2AY56	B2AY56					0.951654	0.817753	0.953125	0.087378	-0.0692628	-0.246051	-0.0692628	-0.246051	16	16	16	30.2997	30.3018	30.608	29.8312	30.4561	30.7145						16	16	16	39.8	39.8	39.8	43.914	0	188.24	8471800000	85	12	12	11	12	14	12	12	12	11	12
tr|A0A090CDJ9|A0A090CDJ9_PODAN Putative 8-O-methyltransferase possibly involved in aflatoxin biosynthesis, member of the aflatoxin cluster OS=Podospora anserina (strain S / ATCC MYA-4624 / DSM 980 / FGSC 10383) OX=515849 PE=4 SV=1	A0A090CDJ9	A0A090CDJ9					0.95758	0.830181	0.87777	0.080827	-0.188085	-0.228889	-0.188085	-0.228889	11	11	11	31.9267	31.5863	32.0918	30.1152	32.1128	32.8125						11	11	11	31.1	31.1	31.1	43.823	0	102.87	25243000000	99	11	11	11	10	11	11	11	11	11	10
tr|B2AXQ1|B2AXQ1_PODAN Podospora anserina S mat+ genomic DNA chromosome 7, supercontig 1 OS=Podospora anserina (strain S / ATCC MYA-4624 / DSM 980 / FGSC 10383) OX=515849 GN=PODANS_7_11310 PE=4 SV=1	B2AXQ1	B2AXQ1					0.956749	0.830246	0.963635	0.0807932	-0.053442	-0.2288	-0.053442	-0.2288	2	2	2	27.1582	27.3648	27.6903	27.0035	27.4908	27.5586						2	2	2	11.6	11.6	11.6	36.634	0	34.776	1060000000	7	2	2	2	2	2	2	2	2	2	2
tr|B2AE37|B2AE37_PODAN Eukaryotic translation initiation factor 3 subunit I OS=Podospora anserina (strain S / ATCC MYA-4624 / DSM 980 / FGSC 10383) OX=515849 GN=TIF34 PE=3 SV=1	B2AE37	B2AE37					0.956114	0.830463	0.990638	0.0806798	-0.0135701	-0.228502	-0.0135701	-0.228502	10	10	10	30.5694	30.6903	30.6964	30.6092	30.7224	30.5838						10	10	10	34.5	34.5	34.5	37.956	0	138.95	10100000000	95	9	10	9	10	10	10	9	10	9	10
tr|B2AAR8|B2AAR8_PODAN Podospora anserina S mat+ genomic DNA chromosome 1, supercontig 1 OS=Podospora anserina (strain S / ATCC MYA-4624 / DSM 980 / FGSC 10383) OX=515849 GN=PODANS_1_4950 PE=4 SV=1	B2AAR8	B2AAR8					0.956239	0.833415	0.980862	0.0791386	-0.0278778	-0.224438	-0.0278778	-0.224438	3	3	3	28.1603	28.3181	28.2366	28.0106	28.2098	28.4109						3	3	3	13.6	13.6	13.6	33.912	0	26.755	1888700000	14	2	3	2	1	3	3	2	3	2	1
tr|B2B7B9|B2B7B9_PODAN Podospora anserina S mat+ genomic DNA chromosome 2, supercontig 2 OS=Podospora anserina (strain S / ATCC MYA-4624 / DSM 980 / FGSC 10383) OX=515849 GN=PODANS_2_10580 PE=4 SV=1	B2B7B9	B2B7B9					0.95647	0.834612	0.973293	0.0785151	-0.0390542	-0.222791	-0.0390542	-0.222791	1	1	1	26.7011	26.5453	26.885	26.389	26.8716	26.7535						1	1	1	3.7	3.7	3.7	38.514	0.00074349	2.5973	663720000	10	1	1	1	1	1	1	1	1	1	1
tr|B2AM29|B2AM29_PODAN 6,7-dimethyl-8-ribityllumazine synthase OS=Podospora anserina (strain S / ATCC MYA-4624 / DSM 980 / FGSC 10383) OX=515849 GN=PODANS_1_14060 PE=3 SV=1	B2AM29	B2AM29					0.956979	0.836946	0.970457	0.0773027	-0.0432638	-0.219584	-0.0432638	-0.219584	5	5	5	30.1047	29.429	29.766	29.6683	29.7575	29.7442						5	5	5	25	25	25	20.855	0	59.974	5450500000	57	5	4	4	4	4	4	5	4	4	4
tr|B2AB72|B2AB72_PODAN Podospora anserina S mat+ genomic DNA chromosome 1, supercontig 1 OS=Podospora anserina (strain S / ATCC MYA-4624 / DSM 980 / FGSC 10383) OX=515849 GN=PODANS_1_6340 PE=4 SV=1	B2AB72	B2AB72					0.956155	0.837076	0.968841	0.0772352	-0.0456676	-0.219405	-0.0456676	-0.219405	7	7	7	29.2769	28.8068	29.0151	29.2961	28.887	28.7787						7	7	7	24.2	24.2	24.2	37.816	0	33.316	3278700000	39	5	6	5	6	6	6	5	6	5	6
tr|A0A090CLR4|A0A090CLR4_PODAN Putative Ubiquitin-activating enzyme E1 1 OS=Podospora anserina (strain S / ATCC MYA-4624 / DSM 980 / FGSC 10383) OX=515849 PE=3 SV=1	A0A090CLR4	A0A090CLR4					0.955082	0.837848	0.931358	0.0768346	-0.102592	-0.218344	-0.102592	-0.218344	3	3	3	26.9387	25.8353	26.9251	26.7037	26.8109	25.8766						3	3	3	5	5	5	115.79	0	10.884	604570000	15	2	2	2	2	2	2	2	2	2	2
tr|B2AC02|B2AC02_PODAN Mannose-6-phosphate isomerase OS=Podospora anserina (strain S / ATCC MYA-4624 / DSM 980 / FGSC 10383) OX=515849 GN=PODANS_2_13950 PE=3 SV=1	B2AC02	B2AC02					0.954336	0.839442	0.969017	0.0760091	-0.0454063	-0.216155	-0.0454063	-0.216155	6	6	6	28.9475	28.4509	28.6035	28.3253	28.8116	28.7287						6	6	6	21	21	21	48.336	0	78.207	2544700000	39	5	4	4	3	5	3	5	4	4	3
tr|B2AMC3|B2AMC3_PODAN Acyl carrier protein OS=Podospora anserina (strain S / ATCC MYA-4624 / DSM 980 / FGSC 10383) OX=515849 GN=PODANS_5_7500 PE=3 SV=1	B2AMC3	B2AMC3					0.956594	0.845204	0.947167	0.0730384	-0.0783094	-0.208255	-0.0783094	-0.208255	2	2	2	26.9923	27.2504	27.0916	27.1754	27.5881	26.3359						2	2	2	15.6	15.6	15.6	15.183	0	5.3846	874210000	19	2	2	2	2	2	2	2	2	2	2
tr|B2A8U7|B2A8U7_PODAN Phosphomannomutase OS=Podospora anserina (strain S / ATCC MYA-4624 / DSM 980 / FGSC 10383) OX=515849 GN=PODANS_1_7430 PE=3 SV=1	B2A8U7	B2A8U7					0.956935	0.846332	0.986979	0.0724593	-0.0189082	-0.206711	-0.0189082	-0.206711	10	10	10	31.113	31.1272	31.3265	31.0506	31.2429	31.2164						10	10	10	48.2	48.2	48.2	30.964	0	55.191	14627000000	88	9	9	9	9	10	10	9	9	9	9
tr|B2ART5|B2ART5_PODAN Podospora anserina S mat+ genomic DNA chromosome 4, supercontig 4 OS=Podospora anserina (strain S / ATCC MYA-4624 / DSM 980 / FGSC 10383) OX=515849 GN=PODANS_4_6440 PE=3 SV=1	B2ART5	B2ART5					0.957319	0.848581	0.970822	0.0713066	-0.0427214	-0.203632	-0.0427214	-0.203632	6	6	5	26.8697	27.1052	27.3624	27.3403	27.0626	26.8062						6	6	5	13.8	13.8	12	59.979	0	20.912	866970000	11	4	5	5	5	3	3	4	5	5	5
tr|B2B6B4|B2B6B4_PODAN Podospora anserina S mat+ genomic DNA chromosome 2, supercontig 2 OS=Podospora anserina (strain S / ATCC MYA-4624 / DSM 980 / FGSC 10383) OX=515849 GN=PODANS_2_7270 PE=4 SV=1	B2B6B4	B2B6B4					0.956504	0.848615	0.887061	0.0712895	-0.172895	-0.203586	-0.172895	-0.203586	10	10	10	28.0162	28.5126	29.3331	26.9687	28.9031	29.4713						10	10	10	20.6	20.6	20.6	71.079	0	126.68	2708400000	46	9	6	9	5	9	10	9	6	9	5
tr|B2B1S3|B2B1S3_PODAN Pyridoxal phosphate homeostasis protein OS=Podospora anserina (strain S / ATCC MYA-4624 / DSM 980 / FGSC 10383) OX=515849 GN=PODANS_6_4280 PE=3 SV=1	B2B1S3	B2B1S3					0.958655	0.85391	0.978666	0.0685878	-0.0311114	-0.196348	-0.0311114	-0.196348	1	1	1	26.6331	27.0627	26.9022	26.6549	26.8625	26.9873						1	1	1	4.9	4.9	4.9	29.31	0	45.472	730420000	15	1	1	1	1	1	1	1	1	1	1
tr|A0A090CJJ4|A0A090CJJ4_PODAN Proteasome subunit beta type OS=Podospora anserina (strain S / ATCC MYA-4624 / DSM 980 / FGSC 10383) OX=515849 PE=3 SV=1	A0A090CJJ4	A0A090CJJ4					0.959162	0.855497	0.994523	0.0677816	-0.00792313	-0.194181	-0.00792313	-0.194181	10	10	10	31.0897	31.0367	31.1175	31.1079	31.1052	31.007						10	10	10	46.8	46.8	46.8	22.314	0	112.74	13650000000	124	9	9	9	10	10	10	9	9	9	10
tr|A0A090CDH4|A0A090CDH4_PODAN Putative fumarate reductase OS=Podospora anserina (strain S / ATCC MYA-4624 / DSM 980 / FGSC 10383) OX=515849 PE=4 SV=1	A0A090CDH4	A0A090CDH4					0.957693	0.856075	0.965395	0.0674881	-0.0508092	-0.193392	-0.0508092	-0.193392	13	13	13	32.4343	31.6472	31.9971	31.7315	32.014	32.1807						13	13	13	32.4	32.4	32.4	66.434	0	187.94	26224000000	108	11	10	12	10	12	11	11	10	12	10
tr|B2AE91|B2AE91_PODAN Peptide hydrolase OS=Podospora anserina (strain S / ATCC MYA-4624 / DSM 980 / FGSC 10383) OX=515849 GN=PODANS_4_9740 PE=3 SV=1	B2AE91	B2AE91					0.958409	0.860445	0.940618	0.065277	-0.0883198	-0.187433	-0.0883198	-0.187433	1	1	1	26.049	25.5295	26.4493	25.961	25.2284	26.5733						1	1	1	3.8	3.8	3.8	39.9	0	11.317	413970000	2	1	1	1	1	1	1	1	1	1	1
tr|A0A090CJI3|A0A090CJI3_PODAN Putative SAM-dependent O-methyltranferase encoded by the PaMTH1 protein OS=Podospora anserina (strain S / ATCC MYA-4624 / DSM 980 / FGSC 10383) OX=515849 PE=4 SV=1	A0A090CJI3	A0A090CJI3					0.958989	0.863263	0.967293	0.0638567	-0.0479749	-0.183594	-0.0479749	-0.183594	22	22	22	36.3979	35.9489	36.2731	35.8026	36.1	36.5735						22	22	22	84.6	84.6	84.6	26.905	0	323.31	491570000000	566	22	22	22	22	22	22	22	22	22	22
tr|A0A090CGF3|A0A090CGF3_PODAN Uncharacterized protein OS=Podospora anserina (strain S / ATCC MYA-4624 / DSM 980 / FGSC 10383) OX=515849 PE=4 SV=1	A0A090CGF3	A0A090CGF3					0.959256	0.864836	0.972178	0.0630662	-0.0407073	-0.181453	-0.0407073	-0.181453	1	1	1	25.6553	25.0655	25.7008	25.4476	25.267	25.5849						1	1	1	7.2	7.2	7.2	25.665	0	36.021	278960000	3	1	1	1	1	1	1	1	1	1	1
tr|B2B7T9|B2B7T9_PODAN Podospora anserina S mat+ genomic DNA chromosome 2, supercontig 2 OS=Podospora anserina (strain S / ATCC MYA-4624 / DSM 980 / FGSC 10383) OX=515849 GN=PODANS_2_12230 PE=4 SV=1	B2B7T9	B2B7T9					0.95969	0.866137	0.953788	0.0624132	-0.0682589	-0.179682	-0.0682589	-0.179682	3	3	3	24.0679	23.308	24.5121	23.6067	24.0485	24.028						3	3	3	17.2	17.2	17.2	19.795	0	13.156	99128000	9	3	2	2	1	2	2	3	2	2	1
tr|B2AS85|B2AS85_PODAN Inositol-1-monophosphatase OS=Podospora anserina (strain S / ATCC MYA-4624 / DSM 980 / FGSC 10383) OX=515849 GN=PODANS_1_22670 PE=3 SV=1	B2AS85	B2AS85					0.958812	0.867687	0.96187	0.0616369	-0.0560862	-0.177574	-0.0560862	-0.177574	3	3	3	26.6905	27.6063	27.5219	27.447	27.1597	27.0436						3	3	3	14.6	14.6	14.6	38.435	0	13.174	976560000	15	2	2	2	3	2	2	2	2	2	3
tr|B2AY18|B2AY18_PODAN Glucose-6-phosphate 1-dehydrogenase OS=Podospora anserina (strain S / ATCC MYA-4624 / DSM 980 / FGSC 10383) OX=515849 GN=PODANS_1_9580 PE=3 SV=1	B2AY18	B2AY18					0.958008	0.867818	0.980305	0.0615712	-0.028698	-0.177396	-0.028698	-0.177396	19	19	19	32.2438	31.8112	32.1281	31.8749	32.2099	32.0123						19	19	19	50.3	50.3	50.3	58.183	0	323.31	26934000000	131	17	17	18	19	17	18	17	17	18	19
tr|B2AFR1|B2AFR1_PODAN Podospora anserina S mat+ genomic DNA chromosome 5, supercontig 7 OS=Podospora anserina (strain S / ATCC MYA-4624 / DSM 980 / FGSC 10383) OX=515849 GN=PODANS_5_12340 PE=4 SV=1	B2AFR1	B2AFR1					0.957259	0.869088	0.973448	0.0609361	-0.0388241	-0.175669	-0.0388241	-0.175669	2	2	2	27.8458	28.0996	28.4046	27.822	28.0673	28.3442						2	2	2	20.7	20.7	20.7	22.973	0	25.439	1743500000	23	2	2	2	2	2	2	2	2	2	2
tr|B2B785|B2B785_PODAN Podospora anserina S mat+ genomic DNA chromosome 2, supercontig 2 OS=Podospora anserina (strain S / ATCC MYA-4624 / DSM 980 / FGSC 10383) OX=515849 GN=PODANS_2_10240 PE=4 SV=1	B2B785	B2B785					0.957585	0.870177	0.961841	0.0603923	-0.0561301	-0.17419	-0.0561301	-0.17419	8	8	8	28.5519	28.5285	28.8722	27.9904	28.8692	28.9245						8	8	8	34.8	34.8	34.8	39.073	0	92.019	2538600000	32	6	6	6	7	7	7	6	6	6	7
tr|B2B6P1|B2B6P1_PODAN Podospora anserina S mat+ genomic DNA chromosome 2, supercontig 2 OS=Podospora anserina (strain S / ATCC MYA-4624 / DSM 980 / FGSC 10383) OX=515849 GN=PODANS_2_8370 PE=4 SV=1	B2B6P1	B2B6P1					0.958575	0.873077	0.829493	0.0589476	-0.269698	-0.170252	-0.269698	-0.170252	5	5	5	27.8204	28.0474	27.8815	24.4824	29.2982	29.1596						5	5	5	45.2	45.2	45.2	11.64	0	17.546	2051300000	28	4	5	5	4	5	5	4	5	5	4
tr|A0A090CFL9|A0A090CFL9_PODAN Transaldolase OS=Podospora anserina (strain S / ATCC MYA-4624 / DSM 980 / FGSC 10383) OX=515849 PE=4 SV=1	A0A090CFL9	A0A090CFL9					0.961779	0.87781	0.987443	0.0565993	-0.0182304	-0.163829	-0.0182304	-0.163829	22	22	22	34.8356	35.0573	35.0907	35.0182	35.0842	34.8265						22	22	22	54.2	54.2	54.2	33.99	0	299.73	204810000000	318	20	19	20	20	21	20	20	19	20	20
tr|B2AN26|B2AN26_PODAN Podospora anserina S mat+ genomic DNA chromosome 6, supercontig 4 OS=Podospora anserina (strain S / ATCC MYA-4624 / DSM 980 / FGSC 10383) OX=515849 GN=PODANS_6_8780 PE=4 SV=1	B2AN26	B2AN26					0.96207	0.881194	0.921864	0.0549287	-0.117374	-0.159244	-0.117374	-0.159244	3	3	3	26.1073	26.0587	26.273	24.564	26.6751	26.8479						3	3	3	16.4	16.4	16.4	35.982	0	5.4403	476020000	4	3	2	3	1	3	2	3	2	3	1
tr|B2AY97|B2AY97_PODAN Alpha-mannosidase OS=Podospora anserina (strain S / ATCC MYA-4624 / DSM 980 / FGSC 10383) OX=515849 GN=PODANS_1_10350 PE=3 SV=1	B2AY97	B2AY97					0.962093	0.883119	0.969785	0.0539809	-0.0442626	-0.156637	-0.0442626	-0.156637	9	9	9	28.0595	28.1786	28.5321	27.7239	28.4462	28.4672						9	9	9	8.2	8.2	8.2	121.86	0	48.163	1942000000	54	5	6	6	6	9	7	5	6	6	6
tr|B2AQH6|B2AQH6_PODAN Podospora anserina S mat+ genomic DNA chromosome 4, supercontig 4 OS=Podospora anserina (strain S / ATCC MYA-4624 / DSM 980 / FGSC 10383) OX=515849 GN=PODANS_4_4110 PE=4 SV=1	B2AQH6	B2AQH6					0.964452	0.890281	0.979941	0.0504731	-0.0292339	-0.14695	-0.0292339	-0.14695	3	3	3	26.432	26.7176	26.535	26.5047	26.2343	26.8579						3	3	3	7	7	7	48.419	0	3.7053	593920000	4	2	1	2	2	2	2	2	1	2	2
tr|B2AYI6|B2AYI6_PODAN Podospora anserina S mat+ genomic DNA chromosome 1, supercontig 2 OS=Podospora anserina (strain S / ATCC MYA-4624 / DSM 980 / FGSC 10383) OX=515849 GN=PODANS_1_11230 PE=4 SV=1	B2AYI6	B2AYI6					0.963914	0.89058	0.955085	0.0503272	-0.0662988	-0.146546	-0.0662988	-0.146546	4	4	4	24.6285	24.5469	25.0911	25.3688	23.9233	24.7755						4	4	4	20.3	20.3	20.3	20.849	0	13.149	174140000	11	3	2	3	2	3	2	3	2	3	2
tr|A0A090CPM0|A0A090CPM0_PODAN Putative Autophagy protein Atg27 OS=Podospora anserina (strain S / ATCC MYA-4624 / DSM 980 / FGSC 10383) OX=515849 PE=4 SV=1	A0A090CPM0	A0A090CPM0					0.963443	0.890972	0.957043	0.0501361	-0.0633437	-0.146016	-0.0633437	-0.146016	3	3	3	24.4267	25.2368	25.9048	24.9769	25.2017	25.1996						3	3	3	9.4	9.4	9.4	38.129	0	6.6821	235060000	5	3	2	3	3	3	3	3	2	3	3
tr|B2ANK0|B2ANK0_PODAN Podospora anserina S mat+ genomic DNA chromosome 6, supercontig 4 OS=Podospora anserina (strain S / ATCC MYA-4624 / DSM 980 / FGSC 10383) OX=515849 GN=PODANS_6_11090 PE=3 SV=1	B2ANK0	B2ANK0					0.962752	0.891097	0.965745	0.0500753	-0.050286	-0.145847	-0.050286	-0.145847	3	3	3	27.6607	27.1154	27.278	27.8891	27.1446	26.8695						3	3	3	16.7	16.7	16.7	31.418	0	83.727	1039900000	20	3	3	3	3	3	3	3	3	3	3
tr|A0A090CMX6|A0A090CMX6_PODAN Putative mitochondrial glutaryl-CoA dehydrogenase OS=Podospora anserina (strain S / ATCC MYA-4624 / DSM 980 / FGSC 10383) OX=515849 PE=3 SV=1	A0A090CMX6	A0A090CMX6					0.964655	0.894443	0.979305	0.0484472	-0.0301704	-0.141327	-0.0301704	-0.141327	2	2	2	24.7105	24.4784	25.1735	24.881	24.6941	24.6968						2	2	2	8.4	8.4	8.4	46.813	0	17.49	173910000	3	1	1	1	1	2	1	1	1	1	1
tr|B2B0B7|B2B0B7_PODAN Podospora anserina S mat+ genomic DNA chromosome 3, supercontig 2 OS=Podospora anserina (strain S / ATCC MYA-4624 / DSM 980 / FGSC 10383) OX=515849 GN=PODANS_3_8590 PE=3 SV=1	B2B0B7	B2B0B7					0.96611	0.898629	0.981147	0.0464196	-0.0274595	-0.135679	-0.0274595	-0.135679	11	11	11	32.6418	32.6297	32.9696	33.0061	32.7316	32.421						11	11	11	67.6	67.6	67.6	11.699	0	323.31	43291000000	157	11	11	11	11	11	11	11	11	11	11
tr|B2B1B8|B2B1B8_PODAN Podospora anserina S mat+ genomic DNA chromosome 3, supercontig 2 OS=Podospora anserina (strain S / ATCC MYA-4624 / DSM 980 / FGSC 10383) OX=515849 GN=PODANS_3_8840 PE=3 SV=1	B2B1B8	B2B1B8					0.966064	0.899764	0.97368	0.0458715	-0.0384801	-0.134149	-0.0384801	-0.134149	13	13	13	32.3067	32.41	32.3713	31.7865	32.7581	32.4281						13	13	13	36.1	36.1	36.1	38.86	0	164.6	33327000000	137	12	12	13	13	13	12	12	12	13	13
tr|B2APU4|B2APU4_PODAN 2-methoxy-6-polyprenyl-1,4-benzoquinol methylase, mitochondrial OS=Podospora anserina (strain S / ATCC MYA-4624 / DSM 980 / FGSC 10383) OX=515849 GN=COQ5 PE=3 SV=1	B2APU4	B2APU4					0.965724	0.902642	0.982091	0.0444844	-0.0260715	-0.130269	-0.0260715	-0.130269	1	1	1	26.3644	26.3014	26.274	26.1063	26.0719	26.6834						1	1	1	4.3	4.3	4.3	38.581	0	51.896	500790000	20	1	1	1	1	1	1	1	1	1	1
tr|B2ADX1|B2ADX1_PODAN Podospora anserina S mat+ genomic DNA chromosome 4, supercontig 2 OS=Podospora anserina (strain S / ATCC MYA-4624 / DSM 980 / FGSC 10383) OX=515849 GN=PODANS_0_370 PE=4 SV=1	B2ADX1	B2ADX1					0.966503	0.904184	0.97256	0.0437431	-0.0401408	-0.128191	-0.0401408	-0.128191	7	7	7	28.4353	28.1035	28.3576	28.453	27.676	28.6471						7	7	7	35.3	35.3	35.3	29.591	0	18.174	1997600000	18	5	4	3	4	5	5	5	4	3	4
tr|B2AAM5|B2AAM5_PODAN Podospora anserina S mat+ genomic DNA chromosome 1, supercontig 1 OS=Podospora anserina (strain S / ATCC MYA-4624 / DSM 980 / FGSC 10383) OX=515849 GN=PODANS_1_4530 PE=3 SV=1	B2AAM5	B2AAM5					0.967746	0.907677	0.989177	0.0420689	-0.0156988	-0.123489	-0.0156988	-0.123489	9	9	9	30.7283	30.808	31.1138	30.8599	30.7877	30.9553						9	9	9	60.2	60.2	60.2	21.259	0	40.322	11867000000	78	8	9	9	9	8	9	8	9	9	9
tr|B2B6B0|B2B6B0_PODAN Podospora anserina S mat+ genomic DNA chromosome 2, supercontig 2 OS=Podospora anserina (strain S / ATCC MYA-4624 / DSM 980 / FGSC 10383) OX=515849 GN=PODANS_2_7230 PE=4 SV=1	B2B6B0	B2B6B0					0.968476	0.909556	0.954926	0.0411704	-0.0665385	-0.120959	-0.0665385	-0.120959	16	16	16	33.8772	33.6318	34.175	32.7957	34.159	34.5297						16	16	16	43.2	43.2	43.2	43.616	0	154.46	102030000000	237	14	15	16	15	15	15	14	15	16	15
tr|B2ABB5|B2ABB5_PODAN Phosphotransferase OS=Podospora anserina (strain S / ATCC MYA-4624 / DSM 980 / FGSC 10383) OX=515849 GN=PODANS_1_6760 PE=3 SV=1	B2ABB5	B2ABB5					0.969886	0.913169	0.966288	0.039449	-0.0494754	-0.1161	-0.0494754	-0.1161	6	6	6	28.4446	27.1607	28.0928	27.4829	28.0931	27.9737						6	6	6	25.7	25.7	25.7	53.477	0	94.658	1539100000	22	6	2	4	4	3	3	6	2	4	4
tr|B2AX33|B2AX33_PODAN 4-nitrophenylphosphatase OS=Podospora anserina (strain S / ATCC MYA-4624 / DSM 980 / FGSC 10383) OX=515849 GN=PODANS_7_9180 PE=4 SV=1	B2AX33	B2AX33					0.970924	0.915392	0.981675	0.0383928	-0.0266819	-0.113111	-0.0266819	-0.113111	3	3	3	27.3335	27.1476	27.0422	27.5814	26.9953	26.8666						3	3	3	10.7	10.7	10.7	33.811	0	10.626	912970000	6	2	2	2	3	3	2	2	2	2	3
tr|A0A090D489|A0A090D489_PODAN V-type proton ATPase subunit C OS=Podospora anserina (strain S / ATCC MYA-4624 / DSM 980 / FGSC 10383) OX=515849 PE=3 SV=1	A0A090D489	A0A090D489					0.970224	0.915523	0.950171	0.0383309	-0.0737413	-0.112936	-0.0737413	-0.112936	3	3	3	26.4089	25.3027	25.945	24.6858	26.2349	26.5147						3	3	3	11.5	11.5	11.5	43.843	0	8.9307	396930000	9	1	3	3	2	2	2	1	3	3	2
tr|B2AVL3|B2AVL3_PODAN Histone H4 OS=Podospora anserina (strain S / ATCC MYA-4624 / DSM 980 / FGSC 10383) OX=515849 GN=PODANS_7_2550 PE=3 SV=1	B2AVL3	B2AVL3					0.972347	0.919801	0.991124	0.036306	-0.0128619	-0.107187	-0.0128619	-0.107187	11	11	11	32.9697	32.9314	33.0468	33.2	32.8543	32.8551						11	11	11	61.2	61.2	61.2	11.356	0	140.36	51107000000	178	11	11	11	10	11	11	11	11	11	10
tr|B2A8Z7|B2A8Z7_PODAN Podospora anserina S mat+ genomic DNA chromosome 1, supercontig 1 OS=Podospora anserina (strain S / ATCC MYA-4624 / DSM 980 / FGSC 10383) OX=515849 GN=PODANS_1_7930 PE=4 SV=1	B2A8Z7	B2A8Z7					0.973869	0.924303	0.980419	0.0341855	-0.0285301	-0.101144	-0.0285301	-0.101144	9	9	9	29.4353	29.3043	29.7142	29.9535	29.3036	29.1111						9	9	9	20.2	20.2	20.2	55.222	0	47.579	4565000000	27	7	5	6	8	6	6	7	5	6	8
tr|B2AXM1|B2AXM1_PODAN Podospora anserina S mat+ genomic DNA chromosome 7, supercontig 1 OS=Podospora anserina (strain S / ATCC MYA-4624 / DSM 980 / FGSC 10383) OX=515849 GN=PODANS_7_11030 PE=4 SV=1	B2AXM1	B2AXM1					0.973084	0.924465	0.956287	0.0341093	-0.0644843	-0.100926	-0.0644843	-0.100926	3	3	3	26.6043	26.746	26.5182	25.2877	27.2192	27.1681						3	3	3	10.8	10.8	10.8	42.644	0	18.938	658680000	9	3	3	3	3	3	2	3	3	3	3
tr|B2B7M8|B2B7M8_PODAN Formate dehydrogenase OS=Podospora anserina (strain S / ATCC MYA-4624 / DSM 980 / FGSC 10383) OX=515849 GN=PODANS_2_11630 PE=3 SV=1	B2B7M8	B2B7M8					0.973369	0.926385	0.988935	0.0332087	-0.0160522	-0.0983516	-0.0160522	-0.0983516	17	17	17	33.6748	33.3474	33.322	33.3119	33.6664	33.3178						17	17	17	57.7	57.7	57.7	46.247	0	323.31	70615000000	222	17	16	16	16	16	16	17	16	16	16
tr|A0A090CJ43|A0A090CJ43_PODAN Uncharacterized protein OS=Podospora anserina (strain S / ATCC MYA-4624 / DSM 980 / FGSC 10383) OX=515849 PE=4 SV=1	A0A090CJ43	A0A090CJ43					0.974945	0.929819	0.871466	0.0316014	-0.198484	-0.0937454	-0.198484	-0.0937454	2	2	2	23.561	25.3436	26.3842	21.0208	26.4667	27.2059						2	2	2	20.2	20.2	20.2	10.866	0	4.8914	392220000	16	1	1	1	1	1	2	1	1	1	1
tr|B2AL70|B2AL70_PODAN Podospora anserina S mat+ genomic DNA chromosome 5, supercontig 9 OS=Podospora anserina (strain S / ATCC MYA-4624 / DSM 980 / FGSC 10383) OX=515849 GN=PODANS_5_9800 PE=4 SV=1	B2AL70	B2AL70					0.975519	0.933297	0.992336	0.0299803	-0.0110989	-0.0890849	-0.0110989	-0.0890849	1	1	1	23.9378	23.6484	23.5409	23.7313	23.7412	23.6213						1	1	1	4.5	4.5	4.5	38.572	0	7.6886	82273000	4	1	1	1	1	1	1	1	1	1	1
tr|B2B7E6|B2B7E6_PODAN Podospora anserina S mat+ genomic DNA chromosome 2, supercontig 2 OS=Podospora anserina (strain S / ATCC MYA-4624 / DSM 980 / FGSC 10383) OX=515849 GN=PODANS_2_10840 PE=4 SV=1	B2B7E6	B2B7E6					0.976249	0.936038	0.990478	0.0287066	-0.0138035	-0.0854126	-0.0138035	-0.0854126	4	4	4	27.9806	28.1834	27.9259	28.2412	28.0519	27.7554						4	4	4	19.3	19.3	19.3	32.088	0	44.82	1879100000	17	3	4	4	3	4	4	3	4	4	3
tr|B2ABD6|B2ABD6_PODAN Peroxidase OS=Podospora anserina (strain S / ATCC MYA-4624 / DSM 980 / FGSC 10383) OX=515849 GN=PODANS_1_6960 PE=3 SV=1	B2ABD6	B2ABD6					0.978723	0.939404	0.991661	0.0271477	-0.0120811	-0.0809052	-0.0120811	-0.0809052	10	10	10	31.6691	31.7708	31.956	31.5469	31.8548	31.9579						10	10	10	35.5	35.5	35.5	39.526	0	151.97	22731000000	95	9	9	9	10	10	9	9	9	9	10
tr|B2ASG3|B2ASG3_PODAN Podospora anserina S mat+ genomic DNA chromosome 1, supercontig 6 OS=Podospora anserina (strain S / ATCC MYA-4624 / DSM 980 / FGSC 10383) OX=515849 GN=PODANS_1_23400 PE=3 SV=1	B2ASG3	B2ASG3					0.98107	0.947096	0.990306	0.023606	-0.014054	-0.070612	-0.014054	-0.070612	11	11	11	29.6411	29.8597	30.1173	29.5711	29.999	30.0058						11	11	11	39.6	39.6	39.6	41.361	0	113.16	5970600000	58	9	8	6	7	10	9	9	8	6	7
tr|B2ATU9|B2ATU9_PODAN Podospora anserina S mat+ genomic DNA chromosome 1, supercontig 4 OS=Podospora anserina (strain S / ATCC MYA-4624 / DSM 980 / FGSC 10383) OX=515849 GN=PODANS_1_17030 PE=4 SV=1	B2ATU9	B2ATU9					0.981147	0.949318	0.989736	0.0225885	-0.0148837	-0.0676409	-0.0148837	-0.0676409	6	6	6	27.6052	28.1404	28.1669	28.2003	27.8295	27.838						6	6	6	11.6	11.6	11.6	56.552	0	48.051	1588300000	20	3	4	5	4	4	5	3	4	5	4
tr|B2AUW6|B2AUW6_PODAN Podospora anserina S mat+ genomic DNA chromosome 7, supercontig 1 OS=Podospora anserina (strain S / ATCC MYA-4624 / DSM 980 / FGSC 10383) OX=515849 GN=PODANS_7_4870 PE=4 SV=1	B2AUW6	B2AUW6					0.982321	0.951332	0.981352	0.0216678	-0.0271581	-0.0649473	-0.0271581	-0.0649473	4	4	4	27.0175	27.9004	28.2934	27.6258	27.4481	28.0558						4	4	4	23	23	23	20.188	0	19.751	1384600000	8	1	3	2	3	3	3	1	3	2	3
tr|B2AYG8|B2AYG8_PODAN Podospora anserina S mat+ genomic DNA chromosome 1, supercontig 2 OS=Podospora anserina (strain S / ATCC MYA-4624 / DSM 980 / FGSC 10383) OX=515849 GN=PODANS_1_11060 PE=4 SV=1	B2AYG8	B2AYG8					0.984554	0.954026	0.988881	0.0204398	-0.0161311	-0.0613466	-0.0161311	-0.0613466	6	6	6	25.5547	25.248	25.9029	25.8273	25.2066	25.6233						6	6	6	12.3	12.3	12.3	88.751	0	23.631	301820000	8	4	5	4	5	4	5	4	5	4	5
sp|B2AFW1|AMPP3_PODAN Probable Xaa-Pro aminopeptidase PEPP OS=Podospora anserina (strain S / ATCC MYA-4624 / DSM 980 / FGSC 10383) OX=515849 GN=PEPP PE=3 SV=1	B2AFW1	B2AFW1					0.983775	0.954106	0.990567	0.0204034	-0.0136738	-0.06124	-0.0136738	-0.06124	9	9	9	30.1336	29.5404	29.5525	29.8841	29.7789	29.5224						9	9	9	26.5	26.5	26.5	51.597	0	144.8	5429300000	44	7	8	9	9	9	9	7	8	9	9
tr|B2APX8|B2APX8_PODAN Podospora anserina S mat+ genomic DNA chromosome 4, supercontig 4 OS=Podospora anserina (strain S / ATCC MYA-4624 / DSM 980 / FGSC 10383) OX=515849 GN=PODANS_4_5930 PE=4 SV=1	B2APX8	B2APX8					0.983074	0.954188	0.99264	0.0203661	-0.010657	-0.0611303	-0.010657	-0.0611303	4	4	4	28.4135	28.718	28.8494	28.494	28.5759	28.8791						4	4	4	38.5	38.5	38.5	17.494	0	37.507	2554600000	37	4	3	4	4	4	4	4	3	4	4
tr|B2AAW6|B2AAW6_PODAN Podospora anserina S mat+ genomic DNA chromosome 1, supercontig 1 OS=Podospora anserina (strain S / ATCC MYA-4624 / DSM 980 / FGSC 10383) OX=515849 GN=PODANS_1_5410 PE=4 SV=1	B2AAW6	B2AAW6					0.982652	0.954573	0.984975	0.020191	-0.0218404	-0.0606162	-0.0218404	-0.0606162	2	2	2	26.6377	26.6948	27.0392	27.2353	26.9585	26.1123						2	2	2	11.3	11.3	11.3	16.029	0	9.5237	711900000	12	2	2	2	2	2	2	2	2	2	2
tr|B2AAJ6|B2AAJ6_PODAN Podospora anserina S mat+ genomic DNA chromosome 1, supercontig 1 OS=Podospora anserina (strain S / ATCC MYA-4624 / DSM 980 / FGSC 10383) OX=515849 GN=PODANS_1_4240 PE=4 SV=1	B2AAJ6	B2AAJ6					0.987987	0.965624	0.996635	0.015192	-0.00486247	-0.0458549	-0.00486247	-0.0458549	10	10	10	30.5467	30.3032	30.2774	30.3455	30.278	30.4893						10	10	10	58.9	58.9	58.9	26.969	0	48.248	8368400000	48	10	8	8	9	8	9	10	8	8	9
tr|B2AQ61|B2AQ61_PODAN Proteasome subunit alpha type OS=Podospora anserina (strain S / ATCC MYA-4624 / DSM 980 / FGSC 10383) OX=515849 GN=PODANS_4_5220 PE=3 SV=1	B2AQ61	B2AQ61					0.990488	0.96839	0.998739	0.0139497	-0.00182088	-0.0421624	-0.00182088	-0.0421624	9	9	9	31.8516	31.7685	31.8212	31.8506	31.8446	31.7406						9	9	9	48.8	48.8	48.8	27.849	0	294.78	22931000000	106	9	9	9	9	9	8	9	9	9	9
tr|B2AB15|B2AB15_PODAN Isocitrate dehydrogenase [NAD] subunit, mitochondrial OS=Podospora anserina (strain S / ATCC MYA-4624 / DSM 980 / FGSC 10383) OX=515849 GN=PODANS_1_5850 PE=3 SV=1	B2AB15	B2AB15					0.99127	0.970307	0.995719	0.0130908	-0.00618998	-0.0396035	-0.00618998	-0.0396035	15	15	15	31.0512	30.7892	31.103	30.7323	31.0675	31.125						15	15	15	47.9	47.9	47.9	42.198	0	130.21	12780000000	109	11	13	13	13	14	13	11	13	13	13
tr|B2AXD7|B2AXD7_PODAN ECHA mitochondrial enoyl-CoA hydratase encoded by the echA protein OS=Podospora anserina (strain S / ATCC MYA-4624 / DSM 980 / FGSC 10383) OX=515849 GN=PODANS_7_10210 PE=3 SV=1	B2AXD7	B2AXD7					0.990911	0.9709	0.994347	0.0128257	-0.00817935	-0.0388127	-0.00817935	-0.0388127	7	7	7	30.5043	30.9528	30.6252	30.6043	30.9995	30.4541						7	7	7	31.6	31.6	31.6	32.621	0	105.41	10519000000	41	7	7	7	7	7	7	7	7	7	7
tr|B2AYF2|B2AYF2_PODAN Podospora anserina S mat+ genomic DNA chromosome 1, supercontig 2 OS=Podospora anserina (strain S / ATCC MYA-4624 / DSM 980 / FGSC 10383) OX=515849 GN=PODANS_1_10900 PE=4 SV=1	B2AYF2	B2AYF2					0.994762	0.975157	0.992432	0.0109253	-0.0109596	-0.0331312	-0.0109596	-0.0331312	3	3	3	26.9498	27.3069	27.3454	26.6357	27.6915	27.2419						3	3	3	14.9	14.9	14.9	27.383	0	14.443	945930000	9	2	2	2	2	2	2	2	2	2	2
tr|A0A090CV63|A0A090CV63_PODAN DNA-directed RNA polymerases I, II, and III subunit RPABC3 OS=Podospora anserina (strain S / ATCC MYA-4624 / DSM 980 / FGSC 10383) OX=515849 PE=3 SV=1	A0A090CV63	A0A090CV63					0.994985	0.976196	0.997197	0.0104628	-0.00404994	-0.0317449	-0.00404994	-0.0317449	3	3	3	27.2357	27.2221	27.5029	27.4781	27.2994	27.1711						3	3	3	19.2	19.2	19.2	17.287	0	51.11	1008000000	32	3	3	3	3	3	3	3	3	3	3
tr|B2AP44|B2AP44_PODAN Podospora anserina S mat+ genomic DNA chromosome 7, supercontig 3 OS=Podospora anserina (strain S / ATCC MYA-4624 / DSM 980 / FGSC 10383) OX=515849 GN=PODANS_7_600 PE=4 SV=1	B2AP44	B2AP44					0.995688	0.977675	0.992997	0.00980565	-0.0101382	-0.0297726	-0.0101382	-0.0297726	3	3	3	26.0979	26.6148	25.7917	26.6165	25.798	26.0595						3	3	3	21.6	21.6	21.6	22.326	0	75.918	463850000	10	2	2	3	3	2	1	2	2	3	3
tr|A0A090C9F7|A0A090C9F7_PODAN Putative phosphoacetylglucosamine mutase OS=Podospora anserina (strain S / ATCC MYA-4624 / DSM 980 / FGSC 10383) OX=515849 PE=4 SV=1	A0A090C9F7	A0A090C9F7					0.994912	0.977737	0.995218	0.00977783	-0.00691605	-0.0296891	-0.00691605	-0.0296891	21	21	21	32.0162	31.3734	32.0424	31.959	31.7598	31.6925						21	21	21	34.7	34.7	34.7	83.141	0	307.65	22868000000	137	18	18	19	17	18	18	18	18	19	17
tr|B2AKK9|B2AKK9_PODAN Podospora anserina S mat+ genomic DNA chromosome 5, supercontig 9 OS=Podospora anserina (strain S / ATCC MYA-4624 / DSM 980 / FGSC 10383) OX=515849 GN=PODANS_5_8030 PE=4 SV=1	B2AKK9	B2AKK9					0.996994	0.979993	0.99113	0.00877697	-0.0128543	-0.0266798	-0.0128543	-0.0266798	3	3	3	25.7093	26.7204	26.7229	26.9895	26.3235	25.801						3	3	3	19.3	19.3	19.3	16.571	0	14.956	551880000	10	3	3	2	3	3	3	3	3	2	3
tr|B2AXT1|B2AXT1_PODAN Scytalone dehydratase OS=Podospora anserina (strain S / ATCC MYA-4624 / DSM 980 / FGSC 10383) OX=515849 GN=PODANS_7_11610 PE=4 SV=1	B2AXT1	B2AXT1					0.99699	0.984023	0.988247	0.00699491	-0.0170568	-0.0213052	-0.0170568	-0.0213052	4	4	4	28.5734	29.6899	29.4666	27.7985	30.1522	29.728						4	4	4	27.5	27.5	27.5	20.022	0	13.164	4323300000	21	4	4	4	3	3	3	4	4	4	3
tr|B2ACR6|B2ACR6_PODAN Adenosylhomocysteinase OS=Podospora anserina (strain S / ATCC MYA-4624 / DSM 980 / FGSC 10383) OX=515849 GN=PODANS_3_1860 PE=3 SV=1	B2ACR6	B2ACR6					0.997784	0.988092	0.998534	0.00520282	-0.00211589	-0.0158788	-0.00211589	-0.0158788	23	23	23	37.061	36.7143	36.6839	36.7708	36.9291	36.753						23	23	23	60.2	60.2	60.2	48.88	0	323.31	731080000000	445	22	22	22	23	22	22	22	22	22	23
tr|B2AW53|B2AW53_PODAN Podospora anserina S mat+ genomic DNA chromosome 7, supercontig 1 OS=Podospora anserina (strain S / ATCC MYA-4624 / DSM 980 / FGSC 10383) OX=515849 GN=PODANS_7_5980 PE=4 SV=1	B2AW53	B2AW53					0.997013	0.988351	0.997885	0.00508889	-0.0030543	-0.0155331	-0.0030543	-0.0155331	1	1	1	25.7649	26.1092	26.1137	25.8836	26.3063	25.7888						1	1	1	0.6	0.6	0.6	119.45	0.0076655	1.7463	404870000	4	1	1	1	1	1	1	1	1	1	1
tr|B2ABJ1|B2ABJ1_PODAN Podospora anserina S mat+ genomic DNA chromosome 1, supercontig 5 OS=Podospora anserina (strain S / ATCC MYA-4624 / DSM 980 / FGSC 10383) OX=515849 GN=PODANS_1_21030 PE=4 SV=1	B2ABJ1	B2ABJ1					0.995812	0.988754	0.998357	0.00491171	-0.00237274	-0.0149953	-0.00237274	-0.0149953	6	6	6	30.5467	30.6774	30.8834	30.5088	30.9331	30.6585						6	6	6	38	38	38	19.385	0	53.927	10539000000	62	5	6	6	6	6	6	5	6	6	6
tr|B2AAK0|B2AAK0_PODAN Podospora anserina S mat+ genomic DNA chromosome 1, supercontig 1 OS=Podospora anserina (strain S / ATCC MYA-4624 / DSM 980 / FGSC 10383) OX=515849 GN=PODANS_1_4280 PE=4 SV=1	B2AAK0	B2AAK0					0.996062	0.989799	0.997475	0.00445311	-0.00364749	-0.0136022	-0.00364749	-0.0136022	8	8	8	29.0585	28.465	28.7788	29.1128	28.7795	28.3991						8	8	8	10.2	10.2	10.2	96.493	0	54.006	2785500000	37	8	8	7	8	8	7	8	8	7	8
tr|B2A941|B2A941_PODAN Pyruvate carboxylase OS=Podospora anserina (strain S / ATCC MYA-4624 / DSM 980 / FGSC 10383) OX=515849 GN=PODANS_1_8330 PE=4 SV=1	B2A941	B2A941					0.997783	0.993552	0.996091	0.00280956	-0.0056502	-0.00859796	-0.0056502	-0.00859796	9	9	9	29.21	27.3839	27.1971	28.0771	27.6453	28.0517						9	9	9	13.3	13.3	13.3	122.28	0	64.631	1721300000	28	8	9	7	9	7	4	8	9	7	9
tr|B2B3Y3|B2B3Y3_PODAN Podospora anserina S mat+ genomic DNA chromosome 6, supercontig 2 OS=Podospora anserina (strain S / ATCC MYA-4624 / DSM 980 / FGSC 10383) OX=515849 GN=PODANS_6_7610 PE=3 SV=1	B2B3Y3	B2B3Y3					0.998124	0.995135	0.999118	0.00211815	-0.00127284	-0.00648718	-0.00127284	-0.00648718	8	8	8	27.6957	27.6144	28.2355	27.8812	27.8048	27.8558						8	8	8	46.4	46.4	46.4	21.583	0	38.988	1473600000	47	6	6	8	7	7	7	6	6	8	7
tr|B2B6M5|B2B6M5_PODAN Podospora anserina S mat+ genomic DNA chromosome 2, supercontig 2 OS=Podospora anserina (strain S / ATCC MYA-4624 / DSM 980 / FGSC 10383) OX=515849 GN=PODANS_2_8220 PE=3 SV=1	B2B6M5	B2B6M5					0.998724	0.996332	0.999098	0.00159576	-0.00130208	-0.00489021	-0.00130208	-0.00489021	3	3	3	27.5956	27.9563	28.5019	28.006	28.0885	27.9554						3	3	3	15	15	15	24.934	0	18.553	1658600000	23	2	3	3	3	3	3	2	3	3	3
tr|B2AYR4|B2AYR4_PODAN Podospora anserina S mat+ genomic DNA chromosome 1, supercontig 2 OS=Podospora anserina (strain S / ATCC MYA-4624 / DSM 980 / FGSC 10383) OX=515849 GN=PODANS_1_11970 PE=4 SV=1	B2AYR4	B2AYR4					0.999264	0.997419	0.998281	0.00112242	-0.00248273	-0.00344152	-0.00248273	-0.00344152	2	2	2	23.9818	23.4543	24.5611	22.7056	24.7113	24.5728						2	2	2	5.6	5.6	5.6	46.843	0	4.4035	112080000	3	1	2	2	1	1	1	1	2	2	1
tr|B2AY01|B2AY01_PODAN Podospora anserina S mat+ genomic DNA chromosome 1, supercontig 2 OS=Podospora anserina (strain S / ATCC MYA-4624 / DSM 980 / FGSC 10383) OX=515849 GN=PODANS_1_9410 PE=3 SV=1	B2AY01	B2AY01					1	0.999941	0.999959	2.57518e-05	-5.97636e-05	-7.90586e-05	-5.97636e-05	-7.90586e-05	4	4	4	26.192	26.0856	27.3369	25.2851	26.9291	27.4002						4	4	4	9.1	9.1	9.1	47.989	0	6.1088	663170000	11	4	4	3	4	4	4	4	4	3	4
tr|A0A090D6C4|A0A090D6C4_PODAN ER lumen protein-retaining receptor OS=Podospora anserina (strain S / ATCC MYA-4624 / DSM 980 / FGSC 10383) OX=515849 PE=3 SV=1	A0A090D6C4	A0A090D6C4					1	0.999672	1.00007	0.000142371	9.79106e-05	0.000437024	9.79106e-05	0.000437024	2	2	2	23.7423	24.3735	24.414	24.112	24.1344	24.2838						2	2	2	8.4	8.4	8.4	25.181	0	3.8736	115090000	5	2	1	2	1	2	1	2	1	2	1
tr|B2B1H6|B2B1H6_PODAN Podospora anserina S mat+ genomic DNA chromosome 3, supercontig 2 OS=Podospora anserina (strain S / ATCC MYA-4624 / DSM 980 / FGSC 10383) OX=515849 GN=PODANS_3_10150 PE=3 SV=1	B2B1H6	B2B1H6					0.998065	0.994508	1.00075	0.00239164	0.00108846	0.0073225	0.00108846	0.0073225	13	13	13	33.7487	33.9425	34.1915	33.8276	33.9704	34.088						13	13	13	46.2	46.2	46.2	34.02	0	146.85	101820000000	220	13	13	12	13	13	13	13	13	12	13
tr|A0A090C8N5|A0A090C8N5_PODAN Putative D-arabinitol 2-dehydrogenase [ribulose-forming] OS=Podospora anserina (strain S / ATCC MYA-4624 / DSM 980 / FGSC 10383) OX=515849 PE=4 SV=1	A0A090C8N5	A0A090C8N5					0.995126	0.990568	1.00421	0.00411587	0.00606092	0.0125769	0.00606092	0.0125769	8	8	8	30.6659	30.774	30.7099	29.7622	31.2469	31.1589						8	8	8	37.2	37.2	37.2	34.499	0	128.61	11152000000	81	8	7	6	4	7	7	8	7	6	4
tr|B2B6B5|B2B6B5_PODAN Podospora anserina S mat+ genomic DNA chromosome 2, supercontig 2 OS=Podospora anserina (strain S / ATCC MYA-4624 / DSM 980 / FGSC 10383) OX=515849 GN=PODANS_2_7280 PE=4 SV=1	B2B6B5	B2B6B5					0.995797	0.990497	1.01402	0.00414677	0.0200812	0.0126709	0.0200812	0.0126709	4	4	4	25.0319	26.5096	27.4018	23.4972	27.4992	28.0072						4	4	4	22.5	22.5	22.5	15.278	0	7.181	778490000	19	3	3	4	3	4	4	3	3	4	3
tr|B2B7Y4|B2B7Y4_PODAN Podospora anserina S mat+ genomic DNA chromosome 2, supercontig 2 OS=Podospora anserina (strain S / ATCC MYA-4624 / DSM 980 / FGSC 10383) OX=515849 GN=PODANS_2_12660 PE=4 SV=1	B2B7Y4	B2B7Y4					0.996497	0.988594	1.00508	0.00498193	0.00730642	0.0152084	0.00730642	0.0152084	2	2	2	25.6985	24.8961	25.8945	26.0246	24.786	25.7004						2	2	2	16.1	16.1	16.1	21.351	0	9.4668	299760000	11	1	1	1	2	2	2	1	1	1	2
tr|B2ATJ3|B2ATJ3_PODAN Podospora anserina S mat+ genomic DNA chromosome 1, supercontig 4 OS=Podospora anserina (strain S / ATCC MYA-4624 / DSM 980 / FGSC 10383) OX=515849 GN=PODANS_1_16060 PE=4 SV=1	B2ATJ3	B2ATJ3					0.998002	0.98754	1.00304	0.00544535	0.00438627	0.0166144	0.00438627	0.0166144	3	3	3	26.0418	26.6918	26.2551	26.1231	26.6962	26.1825						3	3	3	13.4	13.4	13.4	37.97	0	16.875	515550000	2	3	2	3	3	3	2	3	2	3	3
tr|B2AAR4|B2AAR4_PODAN Peptidyl-prolyl cis-trans isomerase OS=Podospora anserina (strain S / ATCC MYA-4624 / DSM 980 / FGSC 10383) OX=515849 GN=PODANS_1_4920 PE=3 SV=1	B2AAR4	B2AAR4					0.999374	0.987224	1.00144	0.00558429	0.00207774	0.0170357	0.00207774	0.0170357	12	12	12	35.6802	35.8675	35.8545	35.5978	35.9517	35.859						12	12	12	65	65	65	25.778	0	303.3	362050000000	280	12	12	12	11	12	12	12	12	12	11
tr|B2B2Y6|B2B2Y6_PODAN Podospora anserina S mat+ genomic DNA chromosome 6, supercontig 2 OS=Podospora anserina (strain S / ATCC MYA-4624 / DSM 980 / FGSC 10383) OX=515849 GN=PODANS_6_1680 PE=4 SV=1	B2B2Y6	B2B2Y6					0.997609	0.984774	1.00458	0.00666361	0.00658925	0.0203036	0.00658925	0.0203036	10	10	10	29.978	29.2385	30.1573	30.1158	29.5846	29.6932						10	10	10	39.2	39.2	39.2	40.398	0	186.5	5725000000	65	9	10	8	9	10	9	9	10	8	9
tr|B2A908|B2A908_PODAN Podospora anserina S mat+ genomic DNA chromosome 1, supercontig 1 OS=Podospora anserina (strain S / ATCC MYA-4624 / DSM 980 / FGSC 10383) OX=515849 GN=PODANS_1_8040 PE=4 SV=1	B2A908	B2A908					0.997227	0.983333	1.01523	0.00729938	0.0218137	0.0222249	0.0218137	0.0222249	2	2	2	21.3494	21.7077	23.0016	20.3632	22.7305	23.0304						2	2	2	8.4	8.4	8.4	21.525	0.00074571	2.6497	31371000	4	2	1	2	2	2	2	2	1	2	2
tr|B2AEY6|B2AEY6_PODAN Podospora anserina S mat+ genomic DNA chromosome 5, supercontig 1 OS=Podospora anserina (strain S / ATCC MYA-4624 / DSM 980 / FGSC 10383) OX=515849 GN=PODANS_5_1120 PE=4 SV=1	B2AEY6	B2AEY6					0.997843	0.983201	1.00762	0.00735761	0.0109475	0.0224008	0.0109475	0.0224008	3	3	3	27.9476	28.4247	27.6136	27.1566	28.3365	28.5257						3	3	3	15.8	15.8	15.8	37.457	0	21.325	1702500000	16	2	3	3	3	3	3	2	3	3	3
tr|B2AR30|B2AR30_PODAN Podospora anserina S mat+ genomic DNA chromosome 4, supercontig 4 OS=Podospora anserina (strain S / ATCC MYA-4624 / DSM 980 / FGSC 10383) OX=515849 GN=PODANS_4_8820 PE=3 SV=1	B2AR30	B2AR30					0.996463	0.981246	1.00639	0.0082221	0.00919024	0.0250086	0.00919024	0.0250086	4	4	3	28.0242	27.982	28.3121	28.4108	27.4131	28.522						4	4	3	27.9	27.9	27.2	14.616	0	11.574	1792400000	16	3	3	3	3	3	3	3	3	3	3
tr|B2AKV2|B2AKV2_PODAN Podospora anserina S mat+ genomic DNA chromosome 5, supercontig 9 OS=Podospora anserina (strain S / ATCC MYA-4624 / DSM 980 / FGSC 10383) OX=515849 GN=PODANS_5_9000 PE=3 SV=1	B2AKV2	B2AKV2					0.996896	0.980727	1.0035	0.00845171	0.00504303	0.0257004	0.00504303	0.0257004	13	13	13	32.6349	32.1409	32.3553	32.1158	32.5464	32.4841						13	13	13	32.7	32.7	32.7	42.917	0	323.31	33916000000	168	13	12	12	13	13	13	13	12	12	13
tr|B2AEG9|B2AEG9_PODAN Diphosphomevalonate decarboxylase OS=Podospora anserina (strain S / ATCC MYA-4624 / DSM 980 / FGSC 10383) OX=515849 GN=PODANS_5_2620 PE=3 SV=1	B2AEG9	B2AEG9					0.993423	0.973703	1.00392	0.0115736	0.00565084	0.0350719	0.00565084	0.0350719	14	14	14	30.2662	30.5292	30.6626	30.2943	30.6796	30.5011						14	14	14	51.1	51.1	51.1	41.88	0	178.7	9096800000	95	14	14	13	13	13	11	14	14	13	13
tr|B2B806|B2B806_PODAN Podospora anserina S mat+ genomic DNA chromosome 2, supercontig 2 OS=Podospora anserina (strain S / ATCC MYA-4624 / DSM 980 / FGSC 10383) OX=515849 GN=PODANS_2_12880 PE=3 SV=1	B2B806	B2B806					0.989796	0.968464	1.00427	0.0139163	0.00614103	0.0420629	0.00614103	0.0420629	3	3	3	27.21	27.4383	27.3738	27.6016	27.2573	27.1817						3	3	3	12.4	12.4	12.4	38.33	0	20.189	1027300000	10	2	2	2	2	2	3	2	2	2	2
tr|B2ARX3|B2ARX3_PODAN Podospora anserina S mat+ genomic DNA chromosome 1, supercontig 6 OS=Podospora anserina (strain S / ATCC MYA-4624 / DSM 980 / FGSC 10383) OX=515849 GN=PODANS_1_21595 PE=4 SV=1	B2ARX3	B2ARX3					0.988223	0.964958	1.03407	0.0154916	0.0483373	0.0467439	0.0483373	0.0467439	3	3	3	27.8148	25.726	25.9121	25.8215	25.6666	28.1098						3	3	3	16.7	16.7	16.7	23.998	0	8.3841	756970000	5	3	2	1	2	1	2	3	2	1	2
tr|B2B2W5|B2B2W5_PODAN Transcription initiation factor IIA subunit 2 OS=Podospora anserina (strain S / ATCC MYA-4624 / DSM 980 / FGSC 10383) OX=515849 GN=PODANS_6_1880 PE=3 SV=1	B2B2W5	B2B2W5					0.985906	0.961913	1.03465	0.0168644	0.0491447	0.0508105	0.0491447	0.0508105	4	4	4	26.7425	25.7608	26.9373	28.3199	25.7006	25.5676						4	4	4	33.6	33.6	33.6	12.712	0	10.082	736980000	11	2	1	1	4	3	1	2	1	1	4
tr|A0A090CI77|A0A090CI77_PODAN Uncharacterized protein OS=Podospora anserina (strain S / ATCC MYA-4624 / DSM 980 / FGSC 10383) OX=515849 PE=4 SV=1	A0A090CI77	A0A090CI77					0.986609	0.961555	1.00715	0.0170259	0.0102781	0.0512881	0.0102781	0.0512881	11	11	11	29.3428	28.774	29.2861	28.9767	29.2629	29.1939						11	11	11	23.3	23.3	23.3	63.876	0	92.754	3581100000	36	11	10	9	10	9	11	11	10	9	10
tr|B2A955|B2A955_PODAN Podospora anserina S mat+ genomic DNA chromosome 1, supercontig 1 OS=Podospora anserina (strain S / ATCC MYA-4624 / DSM 980 / FGSC 10383) OX=515849 GN=PODANS_1_8470 PE=4 SV=1	B2A955	B2A955					0.984646	0.958337	1.01926	0.0184818	0.0275205	0.0555865	0.0275205	0.0555865	3	3	3	26.8115	27.4123	27.361	26.3248	27.8132	27.5294						3	3	3	6.6	6.6	6.6	61.606	0	11.713	1015600000	31	3	3	3	2	3	3	3	3	3	2
tr|B2VLG5|B2VLG5_PODAN Podospora anserina S mat+ genomic DNA chromosome 5, supercontig 6 OS=Podospora anserina (strain S / ATCC MYA-4624 / DSM 980 / FGSC 10383) OX=515849 GN=PODANS_5_6070 PE=3 SV=1	B2VLG5	B2VLG5					0.984498	0.957723	1.01729	0.0187602	0.0247307	0.056407	0.0247307	0.056407	7	7	7	26.3861	25.5422	26.5585	26.7828	26.0099	25.7682						7	7	7	10.9	10.9	10.9	89.282	0	66.4	475590000	23	6	3	6	5	4	4	6	3	6	5
tr|B2AWI9|B2AWI9_PODAN Podospora anserina S mat+ genomic DNA chromosome 7, supercontig 1 OS=Podospora anserina (strain S / ATCC MYA-4624 / DSM 980 / FGSC 10383) OX=515849 GN=PODANS_7_7320 PE=4 SV=1	B2AWI9	B2AWI9					0.982912	0.955497	1.00431	0.0197706	0.00621033	0.0593806	0.00621033	0.0593806	6	6	6	27.6362	27.7716	27.6906	27.8784	27.5431	27.6956						6	6	6	29.7	29.7	29.7	16.269	0	17.134	1314000000	23	6	5	5	5	5	5	6	5	5	5
tr|B2ATX2|B2ATX2_PODAN Podospora anserina S mat+ genomic DNA chromosome 1, supercontig 4 OS=Podospora anserina (strain S / ATCC MYA-4624 / DSM 980 / FGSC 10383) OX=515849 GN=PODANS_1_17250 PE=4 SV=1	B2ATX2	B2ATX2					0.980492	0.947463	1.01065	0.0234376	0.0152874	0.0701206	0.0152874	0.0701206	7	7	7	28.7252	29.1568	29.0128	28.6615	29.0051	29.2741						7	7	7	27.3	27.3	27.3	43.427	0	74.606	3196500000	40	7	6	6	6	7	7	7	6	6	6
tr|B2AR54|B2AR54_PODAN Branched-chain-amino-acid aminotransferase OS=Podospora anserina (strain S / ATCC MYA-4624 / DSM 980 / FGSC 10383) OX=515849 GN=PODANS_4_8600 PE=3 SV=1	B2AR54	B2AR54					0.980254	0.945394	1.00857	0.0243872	0.0123088	0.0728888	0.0123088	0.0728888	7	7	7	29.9157	29.7979	30.2842	30.0173	29.8632	30.1542						7	7	7	24.9	24.9	24.9	46.231	0	113.07	6511800000	50	7	7	7	7	7	7	7	7	7	7
tr|B2B7E0|B2B7E0_PODAN 5-hydroxyisourate hydrolase OS=Podospora anserina (strain S / ATCC MYA-4624 / DSM 980 / FGSC 10383) OX=515849 GN=PODANS_2_10790 PE=3 SV=1	B2B7E0	B2B7E0					0.980375	0.944862	1.00636	0.0246316	0.00915209	0.0736002	0.00915209	0.0736002	5	5	5	28.5385	28.1773	28.5113	28.3736	28.5071	28.3739						5	5	5	60.8	60.8	60.8	15.746	0	49.446	2153200000	30	5	3	5	5	4	5	5	3	5	5
tr|B2AN92|B2AN92_PODAN Podospora anserina S mat+ genomic DNA chromosome 6, supercontig 4 OS=Podospora anserina (strain S / ATCC MYA-4624 / DSM 980 / FGSC 10383) OX=515849 GN=PODANS_6_9290 PE=3 SV=1	B2AN92	B2AN92					0.980506	0.943978	1.02589	0.0250383	0.036869	0.0747835	0.036869	0.0747835	1	1	1	24.7564	25.6857	25.6357	24.6179	25.7436	25.827						1	1	1	3.8	3.8	3.8	32.108	0	3.6406	275900000	8	1	1	1	1	1	1	1	1	1	1
tr|A0A090CAL4|A0A090CAL4_PODAN Malate synthase OS=Podospora anserina (strain S / ATCC MYA-4624 / DSM 980 / FGSC 10383) OX=515849 PE=3 SV=1	A0A090CAL4	A0A090CAL4					0.980325	0.943152	1.01749	0.0254181	0.0250161	0.0758877	0.0250161	0.0758877	9	9	9	29.358	28.7549	29.2833	29.6815	29.0032	28.7867						9	9	9	14.6	14.6	14.6	60.891	0	39.636	3656600000	33	8	8	9	9	8	7	8	8	9	9
tr|A0A090CJM5|A0A090CJM5_PODAN Uncharacterized protein OS=Podospora anserina (strain S / ATCC MYA-4624 / DSM 980 / FGSC 10383) OX=515849 PE=4 SV=1	A0A090CJM5	A0A090CJM5					0.979401	0.94165	1.01371	0.0261104	0.0196489	0.0778982	0.0196489	0.0778982	7	7	7	30.7461	30.1009	30.4477	30.1126	30.5955	30.6455						7	7	7	30.7	30.7	30.7	29.556	0	152.56	8887900000	55	6	6	7	6	6	6	6	6	7	6
tr|B2APZ1|B2APZ1_PODAN Podospora anserina S mat+ genomic DNA chromosome 4, supercontig 4 OS=Podospora anserina (strain S / ATCC MYA-4624 / DSM 980 / FGSC 10383) OX=515849 GN=PODANS_4_5810 PE=4 SV=1	B2APZ1	B2APZ1					0.979557	0.940686	1.03546	0.0265555	0.0502726	0.0791892	0.0502726	0.0791892	2	2	2	23.3753	23.3551	23.2405	22.2676	23.3924	24.4617						2	2	2	3.9	3.9	3.9	50.198	0	3.6613	70686000	2	2	1	1	1	1	1	2	1	1	1
tr|B2AQG5|B2AQG5_PODAN Podospora anserina S mat+ genomic DNA chromosome 4, supercontig 4 OS=Podospora anserina (strain S / ATCC MYA-4624 / DSM 980 / FGSC 10383) OX=515849 GN=PODANS_4_4220 PE=4 SV=1	B2AQG5	B2AQG5					0.977728	0.937722	1.03833	0.0279259	0.0542628	0.083157	0.0542628	0.083157	22	22	22	33.5293	34.4382	34.7764	35.1242	34.4868	33.2957						22	22	22	71.5	71.5	71.5	33.944	0	323.31	137490000000	257	17	20	19	22	19	17	17	20	19	22
tr|B2AAC1|B2AAC1_PODAN Phospho-2-dehydro-3-deoxyheptonate aldolase OS=Podospora anserina (strain S / ATCC MYA-4624 / DSM 980 / FGSC 10383) OX=515849 GN=PODANS_1_3530 PE=3 SV=1	B2AAC1	B2AAC1					0.976208	0.935218	1.03246	0.0290871	0.0460815	0.0865106	0.0460815	0.0865106	6	6	6	28.7935	28.1846	27.0611	27.7365	28.1931	28.2478						6	6	6	11.7	11.7	11.7	52.106	0	13.165	1759600000	11	6	5	5	4	4	5	6	5	5	4
tr|B2AUZ1|B2AUZ1_PODAN Podospora anserina S mat+ genomic DNA chromosome 7, supercontig 1 OS=Podospora anserina (strain S / ATCC MYA-4624 / DSM 980 / FGSC 10383) OX=515849 GN=PODANS_7_4640 PE=4 SV=1	B2AUZ1	B2AUZ1					0.976215	0.933239	1.01164	0.0300072	0.0166944	0.0891621	0.0166944	0.0891621	1	1	1	24.8077	24.5343	24.3746	24.3305	24.6337	24.8025						1	1	1	6.3	6.3	6.3	36.771	0	4.7984	151810000	1	1	1	1	1	1	1	1	1	1	1
tr|A0A090CT31|A0A090CT31_PODAN Uncharacterized protein OS=Podospora anserina (strain S / ATCC MYA-4624 / DSM 980 / FGSC 10383) OX=515849 PE=4 SV=1	A0A090CT31	A0A090CT31					0.976385	0.932896	1.01883	0.0301667	0.0269121	0.0896213	0.0269121	0.0896213	4	4	4	27.1608	26.8271	26.6443	26.3854	27.1608	27.1667						4	4	4	15.7	15.7	15.7	29.038	0	7.3048	762360000	4	2	3	3	3	4	3	2	3	3	3
tr|B2AVS7|B2AVS7_PODAN Podospora anserina S mat+ genomic DNA chromosome 7, supercontig 1 OS=Podospora anserina (strain S / ATCC MYA-4624 / DSM 980 / FGSC 10383) OX=515849 GN=PODANS_7_1930 PE=3 SV=1	B2AVS7	B2AVS7					0.975592	0.931389	1.01721	0.0308687	0.0246162	0.0916408	0.0246162	0.0916408	16	16	16	30.8932	30.8138	30.7566	30.3449	31.2498	30.9428						16	16	16	54.3	54.3	54.3	53.701	0	114.86	11677000000	82	14	14	14	8	12	11	14	14	14	8
tr|B2AE07|B2AE07_PODAN Podospora anserina S mat+ genomic DNA chromosome 4, supercontig 2 OS=Podospora anserina (strain S / ATCC MYA-4624 / DSM 980 / FGSC 10383) OX=515849 GN=PODANS_4_2450 PE=4 SV=1	B2AE07	B2AE07					0.97328	0.925494	1.03616	0.0336266	0.0512511	0.0995469	0.0512511	0.0995469	2	2	2	26.1372	26.2537	26.747	25.4839	26.769	27.0388						2	2	2	6.6	6.6	6.6	36.792	0	14.776	566700000	15	2	2	2	2	2	2	2	2	2	2
tr|A0A090C9A6|A0A090C9A6_PODAN Uncharacterized protein OS=Podospora anserina (strain S / ATCC MYA-4624 / DSM 980 / FGSC 10383) OX=515849 PE=3 SV=1	A0A090C9A6	A0A090C9A6					0.971826	0.922353	1.00725	0.0351028	0.0104249	0.103761	0.0104249	0.103761	5	5	5	28.6587	28.5851	28.6737	28.8428	28.5595	28.5465						5	5	5	18.6	18.6	18.6	42.063	0	98.682	2523800000	33	4	3	5	5	4	3	4	3	5	5
tr|B2AXW8|B2AXW8_PODAN Podospora anserina S mat+ genomic DNA chromosome 1, supercontig 2 OS=Podospora anserina (strain S / ATCC MYA-4624 / DSM 980 / FGSC 10383) OX=515849 GN=PODANS_1_9080 PE=4 SV=1	B2AXW8	B2AXW8					0.972252	0.921917	1.02224	0.0353084	0.0317364	0.104347	0.0317364	0.104347	3	3	3	27.6161	27.5747	27.2329	27.5353	27.0095	27.9741						3	3	3	28.7	28.7	28.7	13.856	0	18.205	1156600000	11	2	3	3	3	3	1	2	3	3	3
tr|A0A090CGY1|A0A090CGY1_PODAN Putative rho-like GTP-binding protein orthologous to S. cerevisiae rho1 OS=Podospora anserina (strain S / ATCC MYA-4624 / DSM 980 / FGSC 10383) OX=515849 PE=4 SV=1	A0A090CGY1	A0A090CGY1					0.972748	0.92122	1.01383	0.0356366	0.0198154	0.105282	0.0198154	0.105282	9	9	9	30.9535	31.1733	31.2941	30.8409	31.314	31.3254						9	9	9	49.5	49.5	49.5	21.655	0	168.64	14457000000	91	9	8	8	7	8	9	9	8	8	7
tr|B2B480|B2B480_PODAN Podospora anserina S mat+ genomic DNA chromosome 2, supercontig 2 OS=Podospora anserina (strain S / ATCC MYA-4624 / DSM 980 / FGSC 10383) OX=515849 GN=PODANS_2_350 PE=4 SV=1	B2B480	B2B480					0.972032	0.918664	1.01283	0.0368432	0.018397	0.108715	0.018397	0.108715	2	2	2	25.793	25.7056	25.8262	25.4653	25.9207	25.9939						2	2	2	7.6	7.6	7.6	39.558	0	14.271	349030000	8	2	2	2	2	2	2	2	2	2	2
tr|B2ABQ1|B2ABQ1_PODAN Podospora anserina S mat+ genomic DNA chromosome 2, supercontig 1 OS=Podospora anserina (strain S / ATCC MYA-4624 / DSM 980 / FGSC 10383) OX=515849 GN=PODANS_0_730 PE=4 SV=1	B2ABQ1	B2ABQ1					0.971251	0.916751	1.02801	0.0377487	0.0398591	0.111285	0.0398591	0.111285	2	2	2	25.7723	26.4454	25.932	25.5645	26.5853	26.1195						2	2	2	25.4	25.4	25.4	13.705	0	49.614	435930000	19	2	2	2	2	2	2	2	2	2	2
tr|B2B119|B2B119_PODAN Podospora anserina S mat+ genomic DNA chromosome 3, supercontig 2 OS=Podospora anserina (strain S / ATCC MYA-4624 / DSM 980 / FGSC 10383) OX=515849 GN=PODANS_3_8060 PE=4 SV=1	B2B119	B2B119					0.969998	0.91191	1.01366	0.0400481	0.0195808	0.117793	0.0195808	0.117793	3	3	3	26.3921	26.1555	26.6637	26.5261	26.2705	26.4735						3	3	3	18.1	18.1	18.1	21.548	0	31.089	539890000	13	1	1	1	2	2	3	1	1	1	2
tr|B2A9R5|B2A9R5_PODAN Podospora anserina S mat+ genomic DNA chromosome 1, supercontig 1 OS=Podospora anserina (strain S / ATCC MYA-4624 / DSM 980 / FGSC 10383) OX=515849 GN=PODANS_1_1540 PE=4 SV=1	B2A9R5	B2A9R5					0.969007	0.910193	1.02925	0.0408663	0.0415916	0.120102	0.0415916	0.120102	7	7	6	29.3637	29.1108	28.3463	28.6672	29.2098	29.0685						7	7	6	38.8	38.8	33.8	23.771	0	56.08	3222000000	38	5	6	5	6	7	6	5	6	5	6
tr|B2AM04|B2AM04_PODAN Podospora anserina S mat+ genomic DNA chromosome 1, supercontig 3 OS=Podospora anserina (strain S / ATCC MYA-4624 / DSM 980 / FGSC 10383) OX=515849 GN=PODANS_1_13430 PE=3 SV=1	B2AM04	B2AM04					0.965714	0.904267	1.04234	0.0437035	0.0598259	0.12808	0.0598259	0.12808	6	6	6	30.821	31.0467	31.2963	31.9558	30.9529	30.4347						6	6	6	32.3	32.3	32.3	14.395	0	14.117	14460000000	48	6	6	5	6	6	6	6	6	5	6
sp|B2ASU5|KATG_PODAN Catalase-peroxidase OS=Podospora anserina (strain S / ATCC MYA-4624 / DSM 980 / FGSC 10383) OX=515849 GN=katG PE=3 SV=1	B2ASU5	B2ASU5					0.965126	0.901394	1.00947	0.0450854	0.0135949	0.131951	0.0135949	0.131951	29	29	29	31.9321	31.9486	32.245	32.0421	32.0887	32.0356						29	29	29	51.9	51.9	51.9	83.15	0	323.31	26738000000	225	24	24	24	24	24	23	24	24	24	24
sp|B2AWD5|CBPYA_PODAN Carboxypeptidase Y homolog A OS=Podospora anserina (strain S / ATCC MYA-4624 / DSM 980 / FGSC 10383) OX=515849 GN=CPYA PE=3 SV=1	B2AWD5	B2AWD5					0.965019	0.900617	1.01816	0.0454597	0.0259679	0.132998	0.0259679	0.132998	5	5	5	30.3657	29.8491	30.1127	29.8853	30.2309	30.2892						5	5	5	14.1	14.1	14.1	61.983	0	47.906	7075500000	34	4	3	4	4	5	5	4	3	4	4
tr|B2B523|B2B523_PODAN Podospora anserina S mat+ genomic DNA chromosome 2, supercontig 2 OS=Podospora anserina (strain S / ATCC MYA-4624 / DSM 980 / FGSC 10383) OX=515849 GN=PODANS_2_3290 PE=3 SV=1	B2B523	B2B523					0.966614	0.899461	1.03945	0.0460177	0.0558217	0.134557	0.0558217	0.134557	2	2	2	21.205	22.3206	22.3252	21.8907	22.3633	21.7641						2	2	2	2.7	2.7	2.7	78.507	0	3.4703	25756000	4	1	2	1	1	1	1	1	2	1	1
tr|B2ANE6|B2ANE6_PODAN Podospora anserina S mat+ genomic DNA chromosome 6, supercontig 4 OS=Podospora anserina (strain S / ATCC MYA-4624 / DSM 980 / FGSC 10383) OX=515849 GN=PODANS_6_10380 PE=3 SV=1	B2ANE6	B2ANE6					0.962619	0.888003	1.04748	0.0515854	0.0669263	0.150028	0.0669263	0.150028	11	11	11	31.6774	31.2755	31.278	30.6335	31.8014	31.9968						11	11	11	57.8	57.8	57.8	27.345	0	247.35	18353000000	117	10	9	10	8	10	11	10	9	10	8
tr|B2ACI5|B2ACI5_PODAN Podospora anserina S mat+ genomic DNA chromosome 3, supercontig 1 OS=Podospora anserina (strain S / ATCC MYA-4624 / DSM 980 / FGSC 10383) OX=515849 GN=PODANS_3_1110 PE=4 SV=1	B2ACI5	B2ACI5					0.963051	0.887488	1.02031	0.0518374	0.0290095	0.150725	0.0290095	0.150725	15	15	15	31.4507	31.6118	31.8659	31.3854	31.739	31.891						15	15	15	57.2	57.2	57.2	35.789	0	206.68	20563000000	116	12	14	14	12	14	15	12	14	14	12
tr|A0A090C940|A0A090C940_PODAN Putative proteasome component OS=Podospora anserina (strain S / ATCC MYA-4624 / DSM 980 / FGSC 10383) OX=515849 PE=4 SV=1	A0A090C940	A0A090C940					0.963745	0.887292	1.02117	0.0519337	0.0302289	0.150991	0.0302289	0.150991	8	8	8	31.1003	30.8716	30.6743	31.1709	30.94	30.626						8	8	8	49.5	49.5	49.5	21.356	0	130	12115000000	76	8	7	7	7	7	7	8	7	7	7
tr|B2AB90|B2AB90_PODAN Podospora anserina S mat+ genomic DNA chromosome 1, supercontig 1 OS=Podospora anserina (strain S / ATCC MYA-4624 / DSM 980 / FGSC 10383) OX=515849 GN=PODANS_1_6520 PE=3 SV=1	B2AB90	B2AB90					0.963043	0.885764	1.01502	0.0526819	0.0215117	0.153057	0.0215117	0.153057	15	15	15	31.6669	31.7985	32.0341	31.6761	31.9711	31.9168						15	15	15	37.6	37.6	37.6	52.359	0	209.33	23237000000	105	11	13	13	12	12	11	11	13	13	12
tr|B2A959|B2A959_PODAN Podospora anserina S mat+ genomic DNA chromosome 1, supercontig 1 OS=Podospora anserina (strain S / ATCC MYA-4624 / DSM 980 / FGSC 10383) OX=515849 GN=PODANS_1_8500 PE=4 SV=1	B2A959	B2A959					0.962008	0.883762	1.15462	0.0536647	0.207423	0.155766	0.207423	0.155766	2	2	2	22.9765	25.451	27.5511	25.2518	25.8039	25.5452						2	2	2	8.5	8.5	8.5	36.436	0	46.197	398280000	3	1	1	2	2	1	1	1	1	2	2
tr|B2B108|B2B108_PODAN Proteasome subunit alpha type OS=Podospora anserina (strain S / ATCC MYA-4624 / DSM 980 / FGSC 10383) OX=515849 GN=PODANS_3_7950 PE=3 SV=1	B2B108	B2B108					0.962171	0.882441	1.00915	0.0543145	0.0131442	0.157555	0.0131442	0.157555	6	6	6	31.1138	30.8762	30.9657	31.0688	31.0158	30.9106						6	6	6	28.5	28.5	28.5	29.892	0	88.785	12833000000	57	5	6	5	6	5	5	5	6	5	6
tr|B2B5N8|B2B5N8_PODAN Podospora anserina S mat+ genomic DNA chromosome 2, supercontig 2 OS=Podospora anserina (strain S / ATCC MYA-4624 / DSM 980 / FGSC 10383) OX=515849 GN=PODANS_2_5270 PE=4 SV=1	B2B5N8	B2B5N8					0.961351	0.878487	1.05094	0.0562648	0.0716763	0.162912	0.0716763	0.162912	1	1	1	25.9309	26.1543	26.1898	25.3026	26.52	26.6674						1	1	1	5.3	5.3	5.3	29.14	0	5.1004	459390000	12	1	1	1	1	1	1	1	1	1	1
tr|B2ARN6|B2ARN6_PODAN 3,4-dihydroxy-2-butanone 4-phosphate synthase OS=Podospora anserina (strain S / ATCC MYA-4624 / DSM 980 / FGSC 10383) OX=515849 GN=PODANS_4_6910 PE=3 SV=1	B2ARN6	B2ARN6					0.960017	0.875309	1.01595	0.0578387	0.0228297	0.167222	0.0228297	0.167222	1	1	1	25.2817	24.8987	25.1646	25.2899	25.0687	25.0549						1	1	1	7.9	7.9	7.9	26.121	0	8.6097	220750000	2	1	1	1	1	1	1	1	1	1	1
tr|B2B4E9|B2B4E9_PODAN Ketol-acid reductoisomerase, mitochondrial OS=Podospora anserina (strain S / ATCC MYA-4624 / DSM 980 / FGSC 10383) OX=515849 GN=PODANS_2_1050 PE=3 SV=1	B2B4E9	B2B4E9					0.956718	0.870858	1.02301	0.0600525	0.0328242	0.173264	0.0328242	0.173264	14	14	14	31.5966	31.8208	32.1452	31.6882	32.0302	31.9427						14	14	14	43.9	43.9	43.9	44.765	0	295.31	23800000000	140	11	12	12	12	13	13	11	12	12	12
tr|B2ADP7|B2ADP7_PODAN V-type proton ATPase subunit G OS=Podospora anserina (strain S / ATCC MYA-4624 / DSM 980 / FGSC 10383) OX=515849 GN=PODANS_4_1680 PE=3 SV=1	B2ADP7	B2ADP7					0.956785	0.870223	1.04326	0.0603694	0.0610956	0.174127	0.0610956	0.174127	1	1	1	25.2261	25.0019	25.6628	25.9041	25.2661	24.904						1	1	1	14	14	14	12.929	0	38.903	260510000	7	1	1	1	1	1	1	1	1	1	1
tr|B2AT50|B2AT50_PODAN Podospora anserina S mat+ genomic DNA chromosome 1, supercontig 4 OS=Podospora anserina (strain S / ATCC MYA-4624 / DSM 980 / FGSC 10383) OX=515849 GN=PODANS_1_14680 PE=3 SV=1	B2AT50	B2AT50					0.957206	0.86784	1.02608	0.0615604	0.0371393	0.177367	0.0371393	0.177367	3	3	3	26.96	27.322	27.6833	27.3844	27.33	27.3624						3	3	3	17.6	17.6	17.6	26.716	0	19.223	1030300000	20	3	3	2	2	2	3	3	3	2	2
tr|B2ADZ7|B2ADZ7_PODAN Tyrosine--tRNA ligase OS=Podospora anserina (strain S / ATCC MYA-4624 / DSM 980 / FGSC 10383) OX=515849 GN=PODANS_4_2350 PE=3 SV=1	B2ADZ7	B2ADZ7					0.959422	0.867554	1.01641	0.0617034	0.0234776	0.177755	0.0234776	0.177755	4	4	4	29.5356	29.2432	29.4446	29.6021	29.4357	29.2561						4	4	4	12.8	12.8	12.8	43.924	0	22.082	4326600000	29	4	4	4	3	4	4	4	4	4	3
tr|B2ABP5|B2ABP5_PODAN Ribosomal protein L37 OS=Podospora anserina (strain S / ATCC MYA-4624 / DSM 980 / FGSC 10383) OX=515849 GN=PODANS_1_20530 PE=3 SV=1	B2ABP5	B2ABP5					0.95965	0.866584	1.06972	0.0621892	0.0972328	0.179074	0.0972328	0.179074	4	4	4	29.8625	30.2961	30.5015	31.3258	29.9361	29.6899						4	4	4	37.2	37.2	37.2	10.594	0	45.407	8399500000	34	4	4	4	4	4	4	4	4	4	4
tr|B2AUE9|B2AUE9_PODAN Podospora anserina S mat+ genomic DNA chromosome 1, supercontig 4 OS=Podospora anserina (strain S / ATCC MYA-4624 / DSM 980 / FGSC 10383) OX=515849 GN=PODANS_1_18900 PE=3 SV=1	B2AUE9	B2AUE9					0.959535	0.862784	1.07579	0.064098	0.105391	0.184247	0.105391	0.184247	4	4	4	26.0864	26.5708	26.3121	27.535	25.8074	25.943						4	4	4	11	11	11	61.375	0	36.137	571950000	18	2	1	1	3	2	1	2	1	1	3
tr|A0A090CKM7|A0A090CKM7_PODAN Putative N-terminal acetyltransferase complex ARD1 subunit OS=Podospora anserina (strain S / ATCC MYA-4624 / DSM 980 / FGSC 10383) OX=515849 PE=4 SV=1	A0A090CKM7	A0A090CKM7					0.9576	0.860633	1.03051	0.0651818	0.0433655	0.187176	0.0433655	0.187176	3	3	3	28.3226	28.1618	28.5414	27.9792	28.5566	28.6202						3	3	3	18.8	18.8	18.8	26.933	0	11.88	2098700000	16	3	3	3	3	3	3	3	3	3	3
tr|A0A090CWI5|A0A090CWI5_PODAN Uncharacterized protein OS=Podospora anserina (strain S / ATCC MYA-4624 / DSM 980 / FGSC 10383) OX=515849 PE=4 SV=1	A0A090CWI5	A0A090CWI5					0.959597	0.8598	1.05659	0.0656023	0.0794131	0.188311	0.0794131	0.188311	4	4	4	27.3754	26.4472	27.8788	27.2521	27.2861	27.4015						4	4	4	20	20	20	20.593	0	30.034	1013200000	24	4	4	4	4	4	4	4	4	4	4
tr|B2ALW0|B2ALW0_PODAN Podospora anserina S mat+ genomic DNA chromosome 1, supercontig 3 OS=Podospora anserina (strain S / ATCC MYA-4624 / DSM 980 / FGSC 10383) OX=515849 GN=PODANS_1_12990 PE=3 SV=1	B2ALW0	B2ALW0					0.95549	0.84895	1.04643	0.0711179	0.0654691	0.203127	0.0654691	0.203127	9	9	9	31.8379	31.3382	31.5487	31.0646	31.9343	31.9223						9	9	9	30.5	30.5	30.5	57.018	0	138.94	20121000000	78	8	8	9	9	9	9	8	8	9	9
tr|A0A090CSU6|A0A090CSU6_PODAN NADH-cytochrome b5 reductase OS=Podospora anserina (strain S / ATCC MYA-4624 / DSM 980 / FGSC 10383) OX=515849 PE=3 SV=1	A0A090CSU6	A0A090CSU6					0.956303	0.84893	1.0509	0.0711283	0.0716317	0.203155	0.0716317	0.203155	2	2	2	26.6859	26.5866	27.2947	26.3786	27.2129	27.1907						2	2	2	8.1	8.1	8.1	33.746	0	10.887	769360000	8	1	1	2	1	2	2	1	1	2	1
tr|B2AZA7|B2AZA7_PODAN Translation machinery-associated protein 20 OS=Podospora anserina (strain S / ATCC MYA-4624 / DSM 980 / FGSC 10383) OX=515849 GN=PODANS_3_3080 PE=3 SV=1	B2AZA7	B2AZA7					0.957183	0.847844	1.35932	0.0716841	0.44289	0.204641	0.44289	0.204641	1	1	1	21.7607	23.7212	26.339	20.9821	25.7676	26.3999						1	1	1	8	8	8	23.475	0	15.353	250010000	8	1	1	1	1	1	1	1	1	1	1
tr|B2AQH8|B2AQH8_PODAN Podospora anserina S mat+ genomic DNA chromosome 4, supercontig 4 OS=Podospora anserina (strain S / ATCC MYA-4624 / DSM 980 / FGSC 10383) OX=515849 GN=PODANS_4_4090 PE=4 SV=1	B2AQH8	B2AQH8					0.957094	0.844681	1.08716	0.0733073	0.12056	0.208972	0.12056	0.208972	2	2	2	24.6416	25.2364	24.7873	23.9125	25.5829	25.5316						2	2	2	8.9	8.9	8.9	33.562	0	9.48	209210000	8	2	2	2	2	1	1	2	2	2	2
tr|B2B0M6|B2B0M6_PODAN Podospora anserina S mat+ genomic DNA chromosome 3, supercontig 2 OS=Podospora anserina (strain S / ATCC MYA-4624 / DSM 980 / FGSC 10383) OX=515849 GN=PODANS_3_6650 PE=4 SV=1	B2B0M6	B2B0M6					0.955131	0.841969	1.07039	0.0747041	0.098142	0.21269	0.098142	0.21269	3	3	3	28.914	28.9002	28.6859	28.0206	29.3799	29.3941						3	3	3	12	12	12	43.082	0	106.21	3117900000	27	3	3	3	2	3	3	3	3	3	2
tr|B2AN82|B2AN82_PODAN Podospora anserina S mat+ genomic DNA chromosome 6, supercontig 4 OS=Podospora anserina (strain S / ATCC MYA-4624 / DSM 980 / FGSC 10383) OX=515849 GN=PODANS_6_9200 PE=4 SV=1	B2AN82	B2AN82					0.955462	0.841567	1.06557	0.0749111	0.0916297	0.21324	0.0916297	0.21324	4	4	4	28.1	28.0741	28.2481	27.6209	29.0526	28.0236						4	4	4	32.5	32.5	32.5	17.965	0	39.064	1927100000	26	2	3	4	3	4	3	2	3	4	3
tr|B2AXA3|B2AXA3_PODAN Podospora anserina S mat+ genomic DNA chromosome 7, supercontig 1 OS=Podospora anserina (strain S / ATCC MYA-4624 / DSM 980 / FGSC 10383) OX=515849 GN=PODANS_7_9860 PE=4 SV=1	B2AXA3	B2AXA3					0.95611	0.841307	1.02567	0.0750457	0.0365626	0.213597	0.0365626	0.213597	2	2	2	26.975	27.2273	27.2146	26.9058	27.1958	27.4249						2	2	2	15.5	15.5	15.5	21.494	0	12.348	904430000	15	2	2	2	2	2	2	2	2	2	2
tr|B2AYC9|B2AYC9_PODAN Dolichyl-diphosphooligosaccharide--protein glycosyltransferase subunit OST2 OS=Podospora anserina (strain S / ATCC MYA-4624 / DSM 980 / FGSC 10383) OX=515849 GN=PODANS_1_10680 PE=3 SV=1	B2AYC9	B2AYC9					0.954918	0.838393	1.08557	0.0765524	0.118451	0.217596	0.118451	0.217596	2	2	2	28.0623	26.6895	28.1737	27.5181	27.4792	28.2835						2	2	2	13.5	13.5	13.5	19.006	0	7.4015	1397300000	16	1	2	1	2	2	2	1	2	1	2
tr|B2ABE6|B2ABE6_PODAN Podospora anserina S mat+ genomic DNA chromosome 1, supercontig 5 OS=Podospora anserina (strain S / ATCC MYA-4624 / DSM 980 / FGSC 10383) OX=515849 GN=PODANS_1_20830 PE=4 SV=1	B2ABE6	B2ABE6					0.957032	0.836324	1.02944	0.0776254	0.0418663	0.220438	0.0418663	0.220438	1	1	1	26.4082	26.6255	26.7226	26.9282	26.5969	26.3568						1	1	1	5.2	5.2	5.2	16.349	0	4.6079	618460000	16	1	1	1	1	1	1	1	1	1	1
tr|B2AN91|B2AN91_PODAN Podospora anserina S mat+ genomic DNA chromosome 6, supercontig 4 OS=Podospora anserina (strain S / ATCC MYA-4624 / DSM 980 / FGSC 10383) OX=515849 GN=PODANS_6_9280 PE=4 SV=1	B2AN91	B2AN91					0.956958	0.833246	1.0287	0.0792266	0.040823	0.22467	0.040823	0.22467	2	2	2	27.8601	27.8254	27.5335	27.5361	28.0512	27.7541						2	2	2	12.1	12.1	12.1	22.403	0	7.8057	1374900000	8	2	1	1	2	2	2	2	1	1	2
tr|A0A090CBN0|A0A090CBN0_PODAN Phosphatidylserine decarboxylase proenzyme 2 OS=Podospora anserina (strain S / ATCC MYA-4624 / DSM 980 / FGSC 10383) OX=515849 GN=PSD2 PE=3 SV=1	A0A090CBN0	A0A090CBN0					0.955287	0.830487	1.10539	0.0806674	0.144551	0.228469	0.144551	0.228469	1	1	1	23.4512	24.5696	24.5722	25.248	24.2988	23.4799						1	1	1	1.3	1.3	1.3	125.7	0	81.278	133500000	11	1	1	1	1	1	1	1	1	1	1
tr|A0A090CJ13|A0A090CJ13_PODAN Putative Thioesterase OS=Podospora anserina (strain S / ATCC MYA-4624 / DSM 980 / FGSC 10383) OX=515849 PE=4 SV=1	A0A090CJ13	A0A090CJ13					0.954212	0.825644	1.02624	0.0832069	0.0373624	0.235144	0.0373624	0.235144	1	1	1	24.9622	24.941	25.1227	25.3184	25.011	24.8087						1	1	1	5.5	5.5	5.5	25.256	0.00074074	2.5556	217020000	7	1	1	1	1	1	1	1	1	1	1
tr|B2B0V4|B2B0V4_PODAN Podospora anserina S mat+ genomic DNA chromosome 3, supercontig 2 OS=Podospora anserina (strain S / ATCC MYA-4624 / DSM 980 / FGSC 10383) OX=515849 GN=PODANS_3_7430 PE=4 SV=1	B2B0V4	B2B0V4					0.953598	0.824345	1.10687	0.083891	0.146484	0.236938	0.146484	0.236938	4	4	4	26.8412	27.9247	26.4927	26.8246	28.118	26.7556						4	4	4	38.1	38.1	38.1	18.256	0	14.989	992910000	29	4	4	4	4	3	2	4	4	4	4
tr|B2AYG0|B2AYG0_PODAN Saccharopine dehydrogenase [NAD(+), L-lysine-forming] OS=Podospora anserina (strain S / ATCC MYA-4624 / DSM 980 / FGSC 10383) OX=515849 GN=PODANS_1_10980 PE=3 SV=1	B2AYG0	B2AYG0					0.953871	0.823924	1.045	0.0841126	0.0634975	0.237518	0.0634975	0.237518	16	16	16	31.4416	31.5804	31.9052	31.2521	31.8753	31.9904						16	16	16	54	54	54	40.477	0	120.37	20913000000	120	14	14	16	16	16	16	14	14	16	16
tr|A0A090CMA4|A0A090CMA4_PODAN Profilin OS=Podospora anserina (strain S / ATCC MYA-4624 / DSM 980 / FGSC 10383) OX=515849 PE=3 SV=1	A0A090CMA4	A0A090CMA4					0.95298	0.82225	1.05528	0.0849961	0.0776323	0.239831	0.0776323	0.239831	4	4	4	31.7949	32.1336	32.2501	31.5503	32.4412	32.42						4	4	4	34.1	34.1	34.1	14.143	0	71.29	28268000000	56	4	4	4	4	4	3	4	4	4	4
tr|B2AUC1|B2AUC1_PODAN Podospora anserina S mat+ genomic DNA chromosome 1, supercontig 4 OS=Podospora anserina (strain S / ATCC MYA-4624 / DSM 980 / FGSC 10383) OX=515849 GN=PODANS_1_18630 PE=4 SV=1	B2AUC1	B2AUC1					0.953033	0.821528	1.03474	0.0853774	0.0492744	0.240828	0.0492744	0.240828	5	5	5	27.8995	27.43	28.1065	27.9076	27.8999	27.7763						5	5	5	17.4	17.4	17.4	47.115	0	29.575	1452300000	18	2	4	4	3	3	3	2	4	4	3
tr|B2AFT9|B2AFT9_PODAN Podospora anserina S mat+ genomic DNA chromosome 6, supercontig 3 OS=Podospora anserina (strain S / ATCC MYA-4624 / DSM 980 / FGSC 10383) OX=515849 GN=PODANS_0_40 PE=4 SV=1	B2AFT9	B2AFT9					0.953237	0.820789	1.1027	0.0857685	0.141044	0.241851	0.141044	0.241851	2	2	2	24.4114	25.349	25.354	25.5086	25.8172	24.2118						2	2	2	20.7	20.7	20.7	15.182	0	4.5753	234230000	6	2	2	2	2	2	2	2	2	2	2
tr|B2AXR1|B2AXR1_PODAN Podospora anserina S mat+ genomic DNA chromosome 7, supercontig 1 OS=Podospora anserina (strain S / ATCC MYA-4624 / DSM 980 / FGSC 10383) OX=515849 GN=PODANS_7_11410 PE=3 SV=1	B2AXR1	B2AXR1					0.953853	0.820368	1.05774	0.0859913	0.080979	0.242433	0.080979	0.242433	3	3	3	26.9547	26.9001	27.269	26.6524	26.9973	27.7171						3	3	3	16.9	16.9	16.9	31.294	0	20.078	877130000	17	2	3	3	1	3	3	2	3	3	1
tr|B2AV78|B2AV78_PODAN Peptidyl-prolyl cis-trans isomerase OS=Podospora anserina (strain S / ATCC MYA-4624 / DSM 980 / FGSC 10383) OX=515849 GN=PODANS_7_3850 PE=4 SV=1	B2AV78	B2AV78					0.952392	0.817317	1.03303	0.0876096	0.0468814	0.246655	0.0468814	0.246655	3	3	3	25.1823	24.7342	25.3321	25.0095	25.1628	25.217						3	3	3	16.1	16.1	16.1	20.08	0	5.9931	218560000	4	2	1	1	2	2	3	2	1	1	2
tr|B2AVR8|B2AVR8_PODAN Podospora anserina S mat+ genomic DNA chromosome 7, supercontig 1 OS=Podospora anserina (strain S / ATCC MYA-4624 / DSM 980 / FGSC 10383) OX=515849 GN=PODANS_7_2020 PE=4 SV=1	B2AVR8	B2AVR8					0.945914	0.807208	1.03736	0.0930147	0.0529219	0.260682	0.0529219	0.260682	3	3	3	28.2533	28.1274	28.4749	28.6786	28.2436	28.0921						3	3	3	21.1	21.1	21.1	26.724	0	98.422	2019900000	33	3	3	3	3	3	3	3	3	3	3
tr|B2B5E7|B2B5E7_PODAN Podospora anserina S mat+ genomic DNA chromosome 2, supercontig 2 OS=Podospora anserina (strain S / ATCC MYA-4624 / DSM 980 / FGSC 10383) OX=515849 GN=PODANS_2_4440 PE=4 SV=1	B2B5E7	B2B5E7					0.945732	0.806063	1.02874	0.0936309	0.0408751	0.262274	0.0408751	0.262274	10	10	10	29.5164	29.907	29.9714	29.7114	29.9058	29.9002						10	10	10	35.6	35.6	35.6	41.351	0	232.75	5714400000	58	7	9	9	9	9	9	7	9	9	9
tr|A0A090CQ05|A0A090CQ05_PODAN Uncharacterized protein OS=Podospora anserina (strain S / ATCC MYA-4624 / DSM 980 / FGSC 10383) OX=515849 PE=4 SV=1	A0A090CQ05	A0A090CQ05					0.945547	0.805418	1.11399	0.0939789	0.155734	0.263173	0.155734	0.263173	2	2	2	24.5766	24.0383	24.4866	23.5801	24.4458	25.5427						2	2	2	14.4	14.4	14.4	17.766	0	3.9343	150030000	3	1	1	1	1	2	1	1	1	1	1
tr|B2ATT9|B2ATT9_PODAN Podospora anserina S mat+ genomic DNA chromosome 1, supercontig 4 OS=Podospora anserina (strain S / ATCC MYA-4624 / DSM 980 / FGSC 10383) OX=515849 GN=PODANS_1_16940 PE=4 SV=1	B2ATT9	B2ATT9					0.945977	0.804131	1.0651	0.0946731	0.0909926	0.264964	0.0909926	0.264964	1	1	1	24.1709	24.8381	24.8526	25.216	24.5652	24.3534						1	1	1	12.1	12.1	12.1	12.359	0.0063604	2.0016	164410000	6	1	1	1	1	1	1	1	1	1	1
tr|A0A090CT04|A0A090CT04_PODAN Uncharacterized protein OS=Podospora anserina (strain S / ATCC MYA-4624 / DSM 980 / FGSC 10383) OX=515849 PE=4 SV=1	A0A090CT04	A0A090CT04					0.94558	0.803357	1.16368	0.0950916	0.218692	0.266043	0.218692	0.266043	1	1	1	25.6789	23.9856	25.0792	23.8346	25.6239	25.9412						1	1	1	7.1	7.1	7.1	24.076	0.0043415	2.226	236880000	11	1	1	1	1	1	1	1	1	1	1
tr|B2A8S2|B2A8S2_PODAN Actin-related protein 2/3 complex subunit OS=Podospora anserina (strain S / ATCC MYA-4624 / DSM 980 / FGSC 10383) OX=515849 GN=PODANS_1_7210 PE=3 SV=1	B2A8S2	B2A8S2					0.945828	0.800774	1.02723	0.0964902	0.0387561	0.269643	0.0387561	0.269643	5	5	5	28.8854	28.8846	29.1803	28.8127	29.1266	29.1272						5	5	5	21.8	21.8	21.8	39.962	0	67.083	3243800000	30	5	4	4	5	4	4	5	4	4	5
tr|A0A090CDQ3|A0A090CDQ3_PODAN Putative mitochondrial SSU ribosomal protein S26 OS=Podospora anserina (strain S / ATCC MYA-4624 / DSM 980 / FGSC 10383) OX=515849 PE=4 SV=1	A0A090CDQ3	A0A090CDQ3					0.945989	0.800179	1.0797	0.0968128	0.110626	0.270472	0.110626	0.270472	4	4	4	26.9772	27.8443	27.7701	28.0626	27.8014	27.0594						4	4	4	17.2	17.2	17.2	36.649	0	129.88	1256100000	13	4	4	4	4	4	4	4	4	4	4
tr|B2B725|B2B725_PODAN Podospora anserina S mat+ genomic DNA chromosome 2, supercontig 2 OS=Podospora anserina (strain S / ATCC MYA-4624 / DSM 980 / FGSC 10383) OX=515849 GN=PODANS_2_9670 PE=3 SV=1	B2B725	B2B725					0.945842	0.798734	1.0565	0.0975979	0.0792955	0.272489	0.0792955	0.272489	4	4	4	28.1998	27.6591	27.5777	28.3229	27.665	27.6865						4	4	4	12.4	12.4	12.4	38.526	0	13.441	1485200000	19	1	3	2	3	3	3	1	3	2	3
tr|A0A090D569|A0A090D569_PODAN Putative Glycoside Hydrolase Family 78 OS=Podospora anserina (strain S / ATCC MYA-4624 / DSM 980 / FGSC 10383) OX=515849 PE=4 SV=1	A0A090D569	A0A090D569					0.946224	0.79785	1.04916	0.0980785	0.0692336	0.273723	0.0692336	0.273723	2	2	2	24.8089	25.1585	25.5817	25.1646	25.4869	25.1053						2	2	2	3.5	3.5	3.5	87.365	0	5.8699	237790000	7	2	2	2	2	2	2	2	2	2	2
tr|B2B7Q6|B2B7Q6_PODAN Glucose-repressible protein encoded by the PaGrg1 protein OS=Podospora anserina (strain S / ATCC MYA-4624 / DSM 980 / FGSC 10383) OX=515849 GN=PODANS_2_11900 PE=4 SV=1	B2B7Q6	B2B7Q6					0.94698	0.797797	1.12032	0.0981074	0.163905	0.273797	0.163905	0.273797	2	2	2	26.5451	27.1677	27.1386	25.9911	27.7488	27.6032						2	2	2	47.9	47.9	47.9	7.466	0	54.488	892550000	23	1	2	1	2	2	1	1	2	1	2
tr|B2B828|B2B828_PODAN Podospora anserina S mat+ genomic DNA chromosome 2, supercontig 2 OS=Podospora anserina (strain S / ATCC MYA-4624 / DSM 980 / FGSC 10383) OX=515849 GN=PODANS_2_13100 PE=4 SV=1	B2B828	B2B828					0.948178	0.797123	1.02018	0.0984745	0.0288296	0.274739	0.0288296	0.274739	7	7	7	29.8064	29.8959	29.7678	29.6641	29.9931	29.8994						7	7	7	73.6	73.6	73.6	14.329	0	61.309	5777400000	67	7	5	6	6	5	5	7	5	6	6
tr|B2B0E0|B2B0E0_PODAN Podospora anserina S mat+ genomic DNA chromosome 3, supercontig 2 OS=Podospora anserina (strain S / ATCC MYA-4624 / DSM 980 / FGSC 10383) OX=515849 GN=PODANS_3_5360 PE=3 SV=1	B2B0E0	B2B0E0					0.948878	0.796275	1.11087	0.0989368	0.151691	0.275924	0.151691	0.275924	6	6	6	29.2816	29.7777	29.8543	30.8121	29.439	29.1176						6	6	6	37.9	37.9	37.9	15.893	0	37.664	5739200000	54	6	6	6	6	6	6	6	6	6	6
tr|B2AUM5|B2AUM5_PODAN Podospora anserina S mat+ genomic DNA chromosome 1, supercontig 4 OS=Podospora anserina (strain S / ATCC MYA-4624 / DSM 980 / FGSC 10383) OX=515849 GN=PODANS_1_19620 PE=4 SV=1	B2AUM5	B2AUM5					0.947714	0.794657	1.14727	0.0998203	0.198206	0.278187	0.198206	0.278187	1	1	1	23.9631	25.7554	24.5713	24.1134	25.7764	24.9947						1	1	1	6.1	6.1	6.1	18.483	0.0056859	2.0294	206980000	8	1	1	1	1	1	1	1	1	1	1
tr|B2ANI2|B2ANI2_PODAN Podospora anserina S mat+ genomic DNA chromosome 6, supercontig 4 OS=Podospora anserina (strain S / ATCC MYA-4624 / DSM 980 / FGSC 10383) OX=515849 GN=PODANS_6_10550 PE=4 SV=1	B2ANI2	B2ANI2					0.945505	0.791718	1.05932	0.101429	0.0831362	0.2823	0.0831362	0.2823	1	1	1	26.182	26.2675	26.4572	25.8233	26.6078	26.7249						1	1	1	7	7	7	26.358	0	21.158	521610000	8	1	1	1	1	1	1	1	1	1	1
tr|B2AB18|B2AB18_PODAN Podospora anserina S mat+ genomic DNA chromosome 1, supercontig 1 OS=Podospora anserina (strain S / ATCC MYA-4624 / DSM 980 / FGSC 10383) OX=515849 GN=PODANS_1_5870 PE=4 SV=1	B2AB18	B2AB18					0.946038	0.789932	1.3301	0.10241	0.411535	0.284803	0.411535	0.284803	2	2	2	25.7701	22.0272	26.7361	25.3966	24.9346	25.4368						2	2	2	9.6	9.6	9.6	39.996	0	24.794	294930000	3	1	1	2	1	2	2	1	1	2	1
tr|B2AUE6|B2AUE6_PODAN Podospora anserina S mat+ genomic DNA chromosome 1, supercontig 4 OS=Podospora anserina (strain S / ATCC MYA-4624 / DSM 980 / FGSC 10383) OX=515849 GN=PODANS_1_18870 PE=4 SV=1	B2AUE6	B2AUE6					0.947638	0.789661	1.15277	0.102559	0.205101	0.285183	0.205101	0.285183	10	10	10	28.6042	28.0784	28.9543	27.5054	28.9328	29.814						10	10	10	22.7	22.7	22.7	49.46	0	42.078	2858400000	37	10	10	10	9	9	10	10	10	10	9
tr|A0A090C8D1|A0A090C8D1_PODAN Uncharacterized protein OS=Podospora anserina (strain S / ATCC MYA-4624 / DSM 980 / FGSC 10383) OX=515849 PE=4 SV=1	A0A090C8D1	A0A090C8D1					0.944583	0.784257	1.03721	0.105542	0.0527134	0.292771	0.0527134	0.292771	6	6	6	29.9747	30.3691	30.4492	30.3273	30.1312	30.4927						6	6	6	29.7	29.7	29.7	21.399	0	23.914	7941700000	55	6	6	6	6	6	6	6	6	6	6
tr|A0A090CIV7|A0A090CIV7_PODAN Putative GTP cyclohydrolase II, Putative riboflavin biosynthesis protein ribAB OS=Podospora anserina (strain S / ATCC MYA-4624 / DSM 980 / FGSC 10383) OX=515849 PE=4 SV=1	A0A090CIV7	A0A090CIV7					0.943177	0.778677	1.03097	0.108642	0.0440032	0.300626	0.0440032	0.300626	2	2	2	24.2599	24.3374	24.2971	24.0539	24.4649	24.5077						2	2	2	7	7	7	56.621	0	3.7546	126330000	3	2	1	1	1	1	1	2	1	1	1
tr|A0A090CQV0|A0A090CQV0_PODAN Tubulin beta chain OS=Podospora anserina (strain S / ATCC MYA-4624 / DSM 980 / FGSC 10383) OX=515849 PE=3 SV=1	A0A090CQV0;CON__ENSEMBL:ENSBTAP00000025008	A0A090CQV0					0.94187	0.77382	1.21627	0.11136	0.282469	0.307483	0.282469	0.307483	13;1	13;1	13;1	29.5272	28.8469	28.5163	30.7902	29.1649	27.7828						13	13	13	38.3	38.3	38.3	49.783	0	284.14	4330000000	46	7	9	9	12	7	6	7	9	9	12
tr|B2B479|B2B479_PODAN AP complex subunit sigma OS=Podospora anserina (strain S / ATCC MYA-4624 / DSM 980 / FGSC 10383) OX=515849 GN=PODANS_2_340 PE=3 SV=1	B2B479	B2B479					0.933195	0.765067	1.50062	0.116301	0.585561	0.319885	0.585561	0.319885	2	2	2	22.1927	24.2921	20.5967	24.2819	19.9805	24.5758						2	2	2	12.3	12.3	12.3	18.158	0	3.326	73360000	5	1	1	1	2	1	1	1	1	1	2
tr|B2AMZ5|B2AMZ5_PODAN Podospora anserina S mat+ genomic DNA chromosome 6, supercontig 4 OS=Podospora anserina (strain S / ATCC MYA-4624 / DSM 980 / FGSC 10383) OX=515849 GN=PODANS_6_8470 PE=4 SV=1	B2AMZ5	B2AMZ5					0.93332	0.764431	1.07298	0.116662	0.101621	0.320789	0.101621	0.320789	8	8	8	27.6681	27.7449	27.6357	27.6284	28.3914	27.3338						8	8	8	23.2	23.2	23.2	39.746	0	41.423	1375500000	19	6	5	5	4	6	4	6	5	5	4
tr|B2ALC4|B2ALC4_PODAN 40S ribosomal protein S26 OS=Podospora anserina (strain S / ATCC MYA-4624 / DSM 980 / FGSC 10383) OX=515849 GN=PODANS_5_3270 PE=3 SV=1	B2ALC4	B2ALC4					0.932191	0.7542	1.12882	0.122514	0.174812	0.335367	0.174812	0.335367	3	3	3	29.8132	29.7189	29.6433	30.9337	29.3031	29.463						3	3	3	30.3	30.3	30.3	13.546	0	13.411	6118900000	34	3	3	3	3	3	3	3	3	3	3
tr|B2AAQ6|B2AAQ6_PODAN Podospora anserina S mat+ genomic DNA chromosome 1, supercontig 1 OS=Podospora anserina (strain S / ATCC MYA-4624 / DSM 980 / FGSC 10383) OX=515849 GN=PODANS_1_4840 PE=4 SV=1	B2AAQ6	B2AAQ6					0.932187	0.753577	1.0502	0.122872	0.0706603	0.336256	0.0706603	0.336256	3	3	3	27.5657	27.3697	27.7784	27.4748	27.4613	27.9896						3	3	3	16.2	16.2	16.2	26.396	0	10.792	1240100000	27	3	3	3	3	3	3	3	3	3	3
tr|A0A090CDI2|A0A090CDI2_PODAN Putative dehydrogenase/reductase involved in aflatoxin biosynthesis orthologous to A. nidulans stcT, member of the aflatoxin cluster OS=Podospora anserina (strain S / ATCC MYA-4624 / DSM 980 / FGSC 10383) OX=515849 PE=3 SV=1	A0A090CDI2	A0A090CDI2					0.932151	0.752334	1.1659	0.12359	0.221438	0.338035	0.221438	0.338035	8	8	8	29.5307	28.8152	29.4677	28.3814	29.5962	30.5003						8	8	8	42	42	42	24.703	0	64.433	4713000000	37	6	5	6	4	7	8	6	5	6	4
tr|B2B6C0|B2B6C0_PODAN Podospora anserina S mat+ genomic DNA chromosome 2, supercontig 2 OS=Podospora anserina (strain S / ATCC MYA-4624 / DSM 980 / FGSC 10383) OX=515849 GN=PODANS_2_7330 PE=4 SV=1	B2B6C0	B2B6C0					0.932617	0.74845	1.1725	0.125837	0.229593	0.343598	0.229593	0.343598	5	5	5	27.9409	27.573	28.5209	27.2089	28.1989	29.3158						5	5	5	25.7	25.7	25.7	31.882	0	54.59	1974000000	18	4	3	5	2	5	5	4	3	5	2
tr|B2B412|B2B412_PODAN Podospora anserina S mat+ genomic DNA chromosome 6, supercontig 2 OS=Podospora anserina (strain S / ATCC MYA-4624 / DSM 980 / FGSC 10383) OX=515849 GN=PODANS_6_7870 PE=4 SV=1	B2B412	B2B412					0.930024	0.744608	1.03853	0.128072	0.0545438	0.349113	0.0545438	0.349113	12	12	12	33.3973	33.5135	33.7963	33.8187	33.4756	33.5764						12	12	12	53	53	53	29.667	0	180.08	79133000000	173	11	12	11	12	12	10	11	12	11	12
tr|B2AXF0|B2AXF0_PODAN Podospora anserina S mat+ genomic DNA chromosome 7, supercontig 1 OS=Podospora anserina (strain S / ATCC MYA-4624 / DSM 980 / FGSC 10383) OX=515849 GN=PODANS_7_10340 PE=4 SV=1	B2AXF0	B2AXF0					0.930089	0.742811	1.03092	0.129122	0.0439262	0.351697	0.0439262	0.351697	6	5	5	28.97	29.3739	29.0727	29.1879	29.2324	29.1282						6	5	5	39	34.2	34.2	24.498	0	57.418	3621500000	29	6	6	6	6	6	6	5	5	5	5
tr|B2A9P0|B2A9P0_PODAN Podospora anserina S mat+ genomic DNA chromosome 1, supercontig 1 OS=Podospora anserina (strain S / ATCC MYA-4624 / DSM 980 / FGSC 10383) OX=515849 GN=PODANS_1_1210 PE=4 SV=1	B2A9P0	B2A9P0					0.930447	0.742403	1.20375	0.12936	0.267538	0.352284	0.267538	0.352284	3	3	3	27.5691	26.8625	27.8508	28.8763	26.4528	27.7559						3	3	3	14.1	14.1	14.1	40.28	0	155.74	1374400000	17	2	2	3	3	3	3	2	2	3	3
tr|B2B1B1|B2B1B1_PODAN Podospora anserina S mat+ genomic DNA chromosome 3, supercontig 2 OS=Podospora anserina (strain S / ATCC MYA-4624 / DSM 980 / FGSC 10383) OX=515849 GN=PODANS_3_8780 PE=4 SV=1	B2B1B1	B2B1B1					0.93131	0.742375	1.04714	0.129377	0.0664609	0.352324	0.0664609	0.352324	5	5	5	27.5873	28.0326	27.7417	27.6271	28.0978	27.8361						5	5	5	16.8	16.8	16.8	38.774	0	37.878	1434800000	24	3	5	5	5	5	4	3	5	5	5
tr|B2AAX1|B2AAX1_PODAN Podospora anserina S mat+ genomic DNA chromosome 1, supercontig 1 OS=Podospora anserina (strain S / ATCC MYA-4624 / DSM 980 / FGSC 10383) OX=515849 GN=PODANS_1_5460 PE=4 SV=1	B2AAX1	B2AAX1					0.93239	0.741344	1.05331	0.12998	0.0749257	0.353809	0.0749257	0.353809	7	7	7	29.0811	29.5754	29.689	29.7068	29.5016	29.362						7	7	7	33.9	33.9	33.9	29.522	0	69.36	4559800000	24	7	6	6	7	7	7	7	6	6	7
tr|B2AY21|B2AY21_PODAN Vacuolar ATPase assembly integral membrane protein VMA21 OS=Podospora anserina (strain S / ATCC MYA-4624 / DSM 980 / FGSC 10383) OX=515849 GN=VMA21 PE=3 SV=1	B2AY21	B2AY21					0.932402	0.740217	1.08819	0.130641	0.121925	0.355433	0.121925	0.355433	1	1	1	23.9148	25.0352	24.7043	24.5072	24.7876	24.7253						1	1	1	16.2	16.2	16.2	12.664	0	4.5704	158080000	4	1	1	1	1	1	1	1	1	1	1
tr|B2AQA0|B2AQA0_PODAN PaNAT2 Arylamine N-acetyltransferase encoded by the PaNAT2 protein OS=Podospora anserina (strain S / ATCC MYA-4624 / DSM 980 / FGSC 10383) OX=515849 GN=PODANS_4_4860 PE=3 SV=1	B2AQA0	B2AQA0					0.927529	0.732563	1.04219	0.135155	0.0596224	0.366489	0.0596224	0.366489	6	6	6	28.403	28.3682	28.4199	28.1446	28.5374	28.688						6	6	6	21.5	21.5	21.5	34.701	0	26.305	2179300000	38	4	5	5	4	6	6	4	5	5	4
tr|B2ABZ7|B2ABZ7_PODAN Podospora anserina S mat+ genomic DNA chromosome 2, supercontig 3 OS=Podospora anserina (strain S / ATCC MYA-4624 / DSM 980 / FGSC 10383) OX=515849 GN=PODANS_2_13900 PE=4 SV=1	B2ABZ7	B2ABZ7					0.927521	0.731878	1.05285	0.135561	0.0743008	0.367481	0.0743008	0.367481	16	16	16	31.7079	31.6537	31.5493	31.319	31.9351	31.8797						16	16	16	58.3	58.3	58.3	35.176	0	302.31	20785000000	124	16	14	16	15	16	16	16	14	16	15
tr|B2AKR0|B2AKR0_PODAN Succinyl-CoA:3-ketoacid-coenzyme A transferase OS=Podospora anserina (strain S / ATCC MYA-4624 / DSM 980 / FGSC 10383) OX=515849 GN=PODANS_5_8230 PE=3 SV=1	B2AKR0	B2AKR0					0.929052	0.728846	1.03117	0.137364	0.0442886	0.371878	0.0442886	0.371878	3	3	3	29.085	28.7889	29.0003	28.893	29.1587	28.9555						3	3	3	10	10	10	56.149	0	113.6	3188600000	24	3	3	3	2	3	3	3	3	3	2
tr|B2B1I3|B2B1I3_PODAN Tubulin alpha chain OS=Podospora anserina (strain S / ATCC MYA-4624 / DSM 980 / FGSC 10383) OX=515849 GN=PODANS_3_10220 PE=3 SV=1	B2B1I3	B2B1I3					0.929184	0.728576	1.32636	0.137525	0.407469	0.37227	0.407469	0.37227	10	10	10	29.1852	28.4449	28.1766	31.0363	28.4872	27.5056						10	10	10	30	30	30	50.096	0	124.13	4048200000	28	4	5	7	10	4	4	4	5	7	10
tr|B2AAE2|B2AAE2_PODAN Podospora anserina S mat+ genomic DNA chromosome 1, supercontig 1 OS=Podospora anserina (strain S / ATCC MYA-4624 / DSM 980 / FGSC 10383) OX=515849 GN=PODANS_1_3700 PE=4 SV=1	B2AAE2	B2AAE2					0.930026	0.727441	1.0339	0.138202	0.0480963	0.373919	0.0480963	0.373919	8	8	8	29.3635	29.6736	29.6298	29.4354	29.703	29.6726						8	8	8	36.5	36.5	36.5	33.934	0	78.181	4833500000	57	6	7	8	7	7	7	6	7	8	7
tr|B2A8T2|B2A8T2_PODAN GTP-binding nuclear protein OS=Podospora anserina (strain S / ATCC MYA-4624 / DSM 980 / FGSC 10383) OX=515849 GN=PODANS_1_7290 PE=3 SV=1	B2A8T2	B2A8T2					0.930711	0.727252	1.02565	0.138315	0.0365384	0.374192	0.0365384	0.374192	11	11	11	33.0737	33.0813	33.0321	33.2808	33.0634	32.9525						11	11	11	36.7	36.7	36.7	24.193	0	88.625	55205000000	133	8	10	11	11	11	9	8	10	11	11
tr|B2B799|B2B799_PODAN Leukotriene A(4) hydrolase OS=Podospora anserina (strain S / ATCC MYA-4624 / DSM 980 / FGSC 10383) OX=515849 GN=PODANS_2_10380 PE=3 SV=1	B2B799	B2B799					0.928873	0.724102	1.139	0.1402	0.187773	0.378775	0.187773	0.378775	4	4	4	25.7366	26.0597	26.2097	25.2568	26.8175	26.495						4	4	4	11.3	11.3	11.3	68.716	0	46.505	456400000	15	2	3	3	2	4	3	2	3	3	2
tr|B2AWX4|B2AWX4_PODAN Podospora anserina S mat+ genomic DNA chromosome 7, supercontig 1 OS=Podospora anserina (strain S / ATCC MYA-4624 / DSM 980 / FGSC 10383) OX=515849 GN=PODANS_7_8600 PE=4 SV=1	B2AWX4	B2AWX4					0.928398	0.721863	1.13165	0.141545	0.178432	0.382038	0.178432	0.382038	1	1	1	23.629	23.6221	23.8317	23.5308	24.787	23.3003						1	1	1	1.7	1.7	1.7	82.934	0.0043353	2.2167	92212000	2	1	1	1	1	1	1	1	1	1	1
tr|B2B1K1|B2B1K1_PODAN Podospora anserina S mat+ genomic DNA chromosome 3, supercontig 2 OS=Podospora anserina (strain S / ATCC MYA-4624 / DSM 980 / FGSC 10383) OX=515849 GN=PODANS_3_10370 PE=4 SV=1	B2B1K1	B2B1K1					0.929351	0.720561	1.09645	0.142329	0.13284	0.383937	0.13284	0.383937	4	4	4	28.7233	28.3622	28.5632	29.3204	28.5085	28.2182						4	4	4	19.3	19.3	19.3	38.757	0	31.451	2549400000	33	4	4	4	3	4	3	4	4	4	3
tr|B2ATS0|B2ATS0_PODAN S-adenosylmethionine synthase OS=Podospora anserina (strain S / ATCC MYA-4624 / DSM 980 / FGSC 10383) OX=515849 GN=PODANS_1_16760 PE=3 SV=1	B2ATS0	B2ATS0					0.9315	0.717113	1.03819	0.144412	0.0540708	0.388975	0.0540708	0.388975	16	16	16	33.2597	33.3608	33.5758	33.2466	33.553	33.5589						16	16	16	53	53	53	41.883	0	309.13	69586000000	201	14	16	16	16	15	16	14	16	16	16
tr|B2AT17|B2AT17_PODAN ATP synthase subunit d, mitochondrial OS=Podospora anserina (strain S / ATCC MYA-4624 / DSM 980 / FGSC 10383) OX=515849 GN=PODANS_1_14370 PE=3 SV=1	B2AT17	B2AT17					0.93006	0.710521	1.05202	0.148423	0.0731684	0.398643	0.0731684	0.398643	11	11	11	31.119	31.2393	31.7106	31.421	31.4907	31.3768						11	11	11	65.3	65.3	65.3	19.283	0	121.83	17063000000	99	11	9	11	10	10	8	11	9	11	10
tr|B2B6B6|B2B6B6_PODAN Podospora anserina S mat+ genomic DNA chromosome 2, supercontig 2 OS=Podospora anserina (strain S / ATCC MYA-4624 / DSM 980 / FGSC 10383) OX=515849 GN=PODANS_2_7290 PE=3 SV=1	B2B6B6	B2B6B6					0.930335	0.709949	1.41352	0.148773	0.499288	0.399482	0.499288	0.399482	3	3	3	27.6062	25.6928	26.2505	24.8267	27.7581	28.4624						3	3	3	8.6	8.6	8.6	55.761	0	11.154	965010000	5	3	2	2	1	2	2	3	2	2	1
tr|B2AQT5|B2AQT5_PODAN Podospora anserina S mat+ genomic DNA chromosome 4, supercontig 4 OS=Podospora anserina (strain S / ATCC MYA-4624 / DSM 980 / FGSC 10383) OX=515849 GN=PODANS_4_3230 PE=4 SV=1	B2AQT5	B2AQT5					0.929155	0.707695	1.20969	0.150154	0.274639	0.4028	0.274639	0.4028	1	1	1	23.1064	24.0373	25.3107	24.2016	24.1746	24.9021						1	1	1	15.2	15.2	15.2	10.393	0	4.5936	137450000	7	1	1	1	1	1	1	1	1	1	1
tr|B2B278|B2B278_PODAN Podospora anserina S mat+ genomic DNA chromosome 6, supercontig 2 OS=Podospora anserina (strain S / ATCC MYA-4624 / DSM 980 / FGSC 10383) OX=515849 GN=PODANS_6_5800 PE=3 SV=1	B2B278	B2B278					0.926205	0.703452	1.04616	0.152765	0.0650978	0.409057	0.0650978	0.409057	8	8	8	29.2426	29.4191	29.7537	29.4814	29.6438	29.4854						8	8	8	20.1	20.1	20.1	55.583	0	86.781	4598300000	34	6	7	8	7	8	8	6	7	8	7
tr|B2A8Z3|B2A8Z3_PODAN Podospora anserina S mat+ genomic DNA chromosome 1, supercontig 1 OS=Podospora anserina (strain S / ATCC MYA-4624 / DSM 980 / FGSC 10383) OX=515849 GN=PODANS_1_7895 PE=4 SV=1	B2A8Z3	B2A8Z3					0.926601	0.702869	1.10487	0.153126	0.143877	0.409919	0.143877	0.409919	3	3	3	28.0386	27.8674	28.9268	28.2964	28.2984	28.6696						3	3	3	11.8	11.8	11.8	19.239	0	29.836	2119100000	39	3	3	3	3	3	3	3	3	3	3
tr|A0A090CFA6|A0A090CFA6_PODAN Malate dehydrogenase OS=Podospora anserina (strain S / ATCC MYA-4624 / DSM 980 / FGSC 10383) OX=515849 PE=3 SV=1	A0A090CFA6	A0A090CFA6					0.926012	0.701337	1.04814	0.154073	0.0678266	0.412185	0.0678266	0.412185	22	22	21	34.9908	35.0649	35.4959	35.3158	35.281	35.1583						22	22	21	77	77	77	35.136	0	323.31	241820000000	361	22	22	22	22	22	22	22	22	22	22
tr|B2AQY2|B2AQY2_PODAN Podospora anserina S mat+ genomic DNA chromosome 4, supercontig 4 OS=Podospora anserina (strain S / ATCC MYA-4624 / DSM 980 / FGSC 10383) OX=515849 GN=PODANS_4_9310 PE=4 SV=1	B2AQY2	B2AQY2					0.925296	0.698232	1.05177	0.156	0.0728226	0.416783	0.0728226	0.416783	4	4	4	29.0085	29.3438	29.6109	29.3775	29.4188	29.3855						4	4	4	14.8	14.8	14.8	35.689	0	29.313	4157800000	33	4	4	3	4	4	4	4	4	3	4
tr|B2AAG9|B2AAG9_PODAN Podospora anserina S mat+ genomic DNA chromosome 1, supercontig 1 OS=Podospora anserina (strain S / ATCC MYA-4624 / DSM 980 / FGSC 10383) OX=515849 GN=PODANS_1_3970 PE=4 SV=1	B2AAG9	B2AAG9					0.925535	0.696707	1.1188	0.15695	0.161952	0.419047	0.161952	0.419047	9	9	9	30.833	31.1374	31.4618	31.9169	31.2639	30.7373						9	9	9	45.9	45.9	45.9	13.931	0	40.238	15687000000	56	8	8	8	9	6	6	8	8	8	9
tr|B2APY0|B2APY0_PODAN Podospora anserina S mat+ genomic DNA chromosome 4, supercontig 4 OS=Podospora anserina (strain S / ATCC MYA-4624 / DSM 980 / FGSC 10383) OX=515849 GN=PODANS_4_5910 PE=4 SV=1	B2APY0	B2APY0					0.925202	0.69072	1.16732	0.160698	0.223202	0.427954	0.223202	0.427954	5	5	5	26.2631	27.1689	27.8865	26.8822	27.6185	27.4875						5	5	5	15.4	15.4	15.4	42.288	0	16.594	997460000	13	3	4	5	3	5	4	3	4	5	3
tr|B2B5Q9|B2B5Q9_PODAN Podospora anserina S mat+ genomic DNA chromosome 2, supercontig 2 OS=Podospora anserina (strain S / ATCC MYA-4624 / DSM 980 / FGSC 10383) OX=515849 GN=PODANS_2_5490 PE=3 SV=1	B2B5Q9	B2B5Q9					0.925928	0.690562	1.25526	0.160797	0.32799	0.428189	0.32799	0.428189	1	1	1	27.4872	26.7187	27.2137	28.9201	26.905	26.5785						1	1	1	4.2	4.2	4.2	45.121	0	105.97	1188000000	13	1	1	1	1	1	1	1	1	1	1
tr|A0A090C8N3|A0A090C8N3_PODAN Putative adenine phosphoribosyltransferase OS=Podospora anserina (strain S / ATCC MYA-4624 / DSM 980 / FGSC 10383) OX=515849 PE=3 SV=1	A0A090C8N3	A0A090C8N3					0.926463	0.689943	1.08017	0.161187	0.111254	0.429112	0.111254	0.429112	6	6	6	28.439	28.7485	28.969	28.4898	28.7905	29.2099						6	6	6	40.9	40.9	40.9	23.592	0	53.404	2802600000	30	6	6	6	5	6	6	6	6	6	5
tr|B2AS38|B2AS38_PODAN Podospora anserina S mat+ genomic DNA chromosome 1, supercontig 6 OS=Podospora anserina (strain S / ATCC MYA-4624 / DSM 980 / FGSC 10383) OX=515849 GN=PODANS_1_22220 PE=3 SV=1	B2AS38	B2AS38					0.925131	0.685643	1.07824	0.163902	0.108675	0.435539	0.108675	0.435539	6	6	6	30.375	30.0804	30.4378	29.9675	30.5493	30.7025						6	6	6	19.9	19.9	19.9	43.755	0	126.18	8721900000	53	6	6	6	6	6	6	6	6	6	6
tr|B2AX91|B2AX91_PODAN Serine/threonine-protein phosphatase OS=Podospora anserina (strain S / ATCC MYA-4624 / DSM 980 / FGSC 10383) OX=515849 GN=PODANS_7_9720 PE=3 SV=1	B2AX91	B2AX91					0.925917	0.685568	1.05405	0.16395	0.0759385	0.435652	0.0759385	0.435652	9	9	9	29.3723	28.956	29.1765	29.4739	29.0389	29.2197						9	9	9	40.2	40.2	40.2	37.019	0	55.981	3744800000	43	7	4	7	7	9	5	7	4	7	7
tr|B2B7C1|B2B7C1_PODAN Podospora anserina S mat+ genomic DNA chromosome 2, supercontig 2 OS=Podospora anserina (strain S / ATCC MYA-4624 / DSM 980 / FGSC 10383) OX=515849 GN=PODANS_2_10600 PE=4 SV=1	B2B7C1	B2B7C1					0.926263	0.684814	1.28848	0.164427	0.365669	0.43678	0.365669	0.43678	5	5	5	27.0751	26.2263	26.5081	25.4577	27.2736	28.1752						5	5	5	18	18	18	35.052	0	11.439	826740000	11	2	3	3	3	4	2	2	3	3	3
tr|B2AWK3|B2AWK3_PODAN Podospora anserina S mat+ genomic DNA chromosome 7, supercontig 1 OS=Podospora anserina (strain S / ATCC MYA-4624 / DSM 980 / FGSC 10383) OX=515849 GN=PODANS_7_7450 PE=4 SV=1	B2AWK3	B2AWK3					0.926498	0.683935	1.09624	0.164985	0.132565	0.438098	0.132565	0.438098	5	5	5	27.9058	28.3099	28.9224	28.6299	28.4058	28.5001						5	5	5	12.1	12.1	12.1	58.067	0	30.258	2243700000	22	4	5	5	5	4	4	4	5	5	5
tr|B2B578|B2B578_PODAN Peptidylprolyl isomerase OS=Podospora anserina (strain S / ATCC MYA-4624 / DSM 980 / FGSC 10383) OX=515849 GN=PODANS_2_3770 PE=4 SV=1	B2B578	B2B578					0.927414	0.68382	1.04109	0.165058	0.0580978	0.43827	0.0580978	0.43827	8	8	8	32.0421	32.0229	32.2944	32.3716	32.1214	32.0408						8	8	8	49	49	49	15.698	0	165.52	28923000000	156	8	8	8	8	8	8	8	8	8	8
tr|B2B5Y9|B2B5Y9_PODAN Podospora anserina S mat+ genomic DNA chromosome 2, supercontig 2 OS=Podospora anserina (strain S / ATCC MYA-4624 / DSM 980 / FGSC 10383) OX=515849 GN=PODANS_2_6210 PE=3 SV=1	B2B5Y9	B2B5Y9					0.927493	0.683155	1.04871	0.165481	0.0686188	0.439268	0.0686188	0.439268	4	4	4	27.1204	26.7841	27.314	27.1446	27.1759	27.1038						4	4	4	14.1	14.1	14.1	36.56	0	14.404	872530000	16	4	4	4	4	2	4	4	4	4	4
tr|B2AQC6|B2AQC6_PODAN Podospora anserina S mat+ genomic DNA chromosome 4, supercontig 4 OS=Podospora anserina (strain S / ATCC MYA-4624 / DSM 980 / FGSC 10383) OX=515849 GN=PODANS_4_4600 PE=4 SV=1	B2AQC6	B2AQC6					0.928071	0.682672	1.03673	0.165788	0.0520382	0.439992	0.0520382	0.439992	8	8	8	30.0955	29.9701	29.8268	29.9273	30.1946	29.9265						8	8	8	41.7	41.7	41.7	27.511	0	51.466	6421400000	40	7	8	6	6	8	6	7	8	6	6
tr|B2B7R7|B2B7R7_PODAN Elongation factor Tu OS=Podospora anserina (strain S / ATCC MYA-4624 / DSM 980 / FGSC 10383) OX=515849 GN=PODANS_2_12010 PE=3 SV=1	B2B7R7	B2B7R7					0.928357	0.68195	1.04506	0.166248	0.063584	0.441076	0.063584	0.441076	15	15	15	31.49	31.4275	31.5988	31.2987	31.7062	31.7022						15	15	15	35.8	35.8	35.8	48.749	0	93.722	18795000000	141	14	14	14	14	14	13	14	14	14	14
tr|B2B2S7|B2B2S7_PODAN Podospora anserina S mat+ genomic DNA chromosome 6, supercontig 2 OS=Podospora anserina (strain S / ATCC MYA-4624 / DSM 980 / FGSC 10383) OX=515849 GN=PODANS_6_2210 PE=3 SV=1	B2B2S7	B2B2S7					0.926971	0.680253	1.0466	0.16733	0.0657088	0.443626	0.0657088	0.443626	4	4	4	28.1392	28.4735	28.5859	28.3961	28.4091	28.5905						4	4	4	19.8	19.8	19.8	33.683	0	63.566	2185200000	36	4	4	4	4	4	4	4	4	4	4
tr|A0A090CQ82|A0A090CQ82_PODAN Cytochrome b-c1 complex subunit Rieske, mitochondrial OS=Podospora anserina (strain S / ATCC MYA-4624 / DSM 980 / FGSC 10383) OX=515849 PE=4 SV=1	A0A090CQ82	A0A090CQ82					0.924867	0.6782	1.04595	0.168642	0.0648155	0.446715	0.0648155	0.446715	5	5	5	29.4174	29.6107	29.7638	29.4823	29.8458	29.6582						5	5	5	29.8	29.8	29.8	24.517	0	94.804	5010500000	48	5	5	5	5	4	4	5	5	5	5
tr|B2AFB3|B2AFB3_PODAN Podospora anserina S mat+ genomic DNA chromosome 5, supercontig 2 OS=Podospora anserina (strain S / ATCC MYA-4624 / DSM 980 / FGSC 10383) OX=515849 GN=PODANS_0_1580 PE=3 SV=1	B2AFB3	B2AFB3					0.923423	0.676083	1.17007	0.17	0.226597	0.449905	0.226597	0.449905	7	7	7	31.9349	32.32	32.6551	33.4082	32.3202	31.8614						7	7	7	41.4	41.4	41.4	13.059	0	27.27	36931000000	84	7	7	7	7	7	7	7	7	7	7
tr|B2AUA0|B2AUA0_PODAN Podospora anserina S mat+ genomic DNA chromosome 1, supercontig 4 OS=Podospora anserina (strain S / ATCC MYA-4624 / DSM 980 / FGSC 10383) OX=515849 GN=PODANS_1_18430 PE=4 SV=1	B2AUA0	B2AUA0					0.925305	0.675102	1.07225	0.170631	0.100641	0.451386	0.100641	0.451386	5	5	5	28.671	28.8439	28.7535	28.8185	29.2508	28.501						5	5	5	17.8	17.8	17.8	34.286	0	19.698	2868300000	42	4	4	5	5	3	4	4	4	5	5
tr|B2AWH9|B2AWH9_PODAN Podospora anserina S mat+ genomic DNA chromosome 7, supercontig 1 OS=Podospora anserina (strain S / ATCC MYA-4624 / DSM 980 / FGSC 10383) OX=515849 GN=PODANS_7_7225 PE=3 SV=1	B2AWH9	B2AWH9					0.925211	0.674205	1.163	0.171208	0.217854	0.452741	0.217854	0.452741	8	8	8	31.1901	31.9399	31.8945	32.6931	31.6858	31.2991						8	8	8	68.5	68.5	68.5	10.161	0	40.533	23610000000	84	8	7	8	8	7	8	8	7	8	8
tr|B2B0N8|B2B0N8_PODAN Podospora anserina S mat+ genomic DNA chromosome 3, supercontig 2 OS=Podospora anserina (strain S / ATCC MYA-4624 / DSM 980 / FGSC 10383) OX=515849 GN=PODANS_3_6770 PE=3 SV=1	B2B0N8	B2B0N8					0.926046	0.67337	1.06383	0.171746	0.0892639	0.454003	0.0892639	0.454003	5	5	5	28.2093	27.6686	28.2062	27.9583	28.1865	28.2071						5	5	5	22.1	22.1	22.1	33.962	0	46.04	1731500000	38	4	4	4	4	5	4	4	4	4	4
tr|B2AA45|B2AA45_PODAN Podospora anserina S mat+ genomic DNA chromosome 1, supercontig 1 OS=Podospora anserina (strain S / ATCC MYA-4624 / DSM 980 / FGSC 10383) OX=515849 GN=PODANS_1_2800 PE=4 SV=1	B2AA45	B2AA45					0.924639	0.670202	1.09589	0.173794	0.132107	0.458798	0.132107	0.458798	4	4	4	27.7964	27.8483	27.9082	27.5973	27.8099	28.542						4	4	4	31.3	31.3	31.3	10.989	0	26.914	1555800000	27	3	3	3	4	3	3	3	3	3	4
tr|A0A090CTH5|A0A090CTH5_PODAN Putative 6-phosphogluconolactonase OS=Podospora anserina (strain S / ATCC MYA-4624 / DSM 980 / FGSC 10383) OX=515849 PE=4 SV=1	A0A090CTH5	A0A090CTH5					0.925147	0.668878	1.0295	0.174653	0.0419375	0.460806	0.0419375	0.460806	17	17	17	32.2544	32.0452	32.2482	32.3373	32.202	32.1344						17	17	17	90.1	90.1	90.1	28.58	0	245.7	29835000000	173	16	14	16	15	14	15	16	14	16	15
tr|B2AB56|B2AB56_PODAN Glycerol-3-phosphate dehydrogenase [NAD(+)] OS=Podospora anserina (strain S / ATCC MYA-4624 / DSM 980 / FGSC 10383) OX=515849 GN=PODANS_1_6190 PE=3 SV=1	B2AB56	B2AB56					0.922191	0.666064	1.05337	0.176484	0.0750154	0.465081	0.0750154	0.465081	7	7	7	26.9498	27.2799	27.4233	27.1333	27.3671	27.3777						7	7	7	19.1	19.1	19.1	62.079	0	19.737	967290000	18	2	3	5	3	4	3	2	3	5	3
tr|A0A090DBE2|A0A090DBE2_PODAN Putative cytosolic translation initiation factor 4B OS=Podospora anserina (strain S / ATCC MYA-4624 / DSM 980 / FGSC 10383) OX=515849 PE=4 SV=1	A0A090DBE2	A0A090DBE2					0.920891	0.664524	1.06584	0.177489	0.0919971	0.467425	0.0919971	0.467425	4	4	4	28.0799	27.723	28.39	28.1846	28.0772	28.207						4	4	4	9.9	9.9	9.9	58.886	0	29.572	1755100000	38	4	4	4	4	4	4	4	4	4	4
tr|B2AXS7|B2AXS7_PODAN Podospora anserina S mat+ genomic DNA chromosome 7, supercontig 1 OS=Podospora anserina (strain S / ATCC MYA-4624 / DSM 980 / FGSC 10383) OX=515849 GN=PODANS_7_11570 PE=4 SV=1	B2AXS7	B2AXS7					0.921498	0.661769	1.2252	0.179294	0.293016	0.471626	0.293016	0.471626	12	12	12	32.3126	32.9037	33.0685	34.1271	32.889	32.1478						12	12	12	58.6	58.6	58.6	16.91	0	323.31	53870000000	285	12	12	11	12	12	12	12	12	11	12
tr|B2AX98|B2AX98_PODAN Podospora anserina S mat+ genomic DNA chromosome 7, supercontig 1 OS=Podospora anserina (strain S / ATCC MYA-4624 / DSM 980 / FGSC 10383) OX=515849 GN=PODANS_7_9790 PE=4 SV=1	B2AX98	B2AX98					0.922621	0.660751	1.11064	0.179962	0.151397	0.47318	0.151397	0.47318	1	1	1	23.7979	23.997	23.6168	23.3561	24.2139	24.2959						1	1	1	1.9	1.9	1.9	63.912	0	3.4353	94981000	7	1	1	1	1	1	1	1	1	1	1
tr|B2B5X5|B2B5X5_PODAN Peptidyl-prolyl cis-trans isomerase OS=Podospora anserina (strain S / ATCC MYA-4624 / DSM 980 / FGSC 10383) OX=515849 GN=PODANS_2_6070 PE=3 SV=1	B2B5X5	B2B5X5					0.920281	0.656096	1.06689	0.183032	0.0934105	0.480306	0.0934105	0.480306	8	8	8	31.2164	31.6029	31.7776	31.4585	31.8095	31.6093						8	8	8	44.7	44.7	44.7	22.66	0	94.272	19470000000	90	6	7	8	7	7	6	6	7	8	7
tr|B2AP92|B2AP92_PODAN Defective in cullin neddylation protein OS=Podospora anserina (strain S / ATCC MYA-4624 / DSM 980 / FGSC 10383) OX=515849 GN=PODANS_7_380 PE=4 SV=1	B2AP92	B2AP92					0.918588	0.653021	1.07654	0.185073	0.106404	0.48503	0.106404	0.48503	5	5	5	27.1269	27.5515	27.7643	27.3799	27.6086	27.7735						5	5	5	20.8	20.8	20.8	42.53	0	43.318	1180000000	19	3	4	4	5	4	4	3	4	4	5
tr|B2B624|B2B624_PODAN Podospora anserina S mat+ genomic DNA chromosome 2, supercontig 2 OS=Podospora anserina (strain S / ATCC MYA-4624 / DSM 980 / FGSC 10383) OX=515849 GN=PODANS_2_6490 PE=3 SV=1	B2B624	B2B624					0.917173	0.651304	1.1039	0.186216	0.142609	0.487673	0.142609	0.487673	4	4	4	28.9809	29.1039	29.2315	28.7107	29.3608	29.6726						4	4	4	10.1	10.1	10.1	52.371	0	26.999	3721600000	26	4	4	4	4	4	4	4	4	4	4
tr|B2ALR1|B2ALR1_PODAN Podospora anserina S mat+ genomic DNA chromosome 1, supercontig 3 OS=Podospora anserina (strain S / ATCC MYA-4624 / DSM 980 / FGSC 10383) OX=515849 GN=PODANS_1_13550 PE=4 SV=1	B2ALR1	B2ALR1					0.916838	0.650488	1.07909	0.186761	0.109816	0.488931	0.109816	0.488931	1	1	1	25.1315	25.1066	25.3833	24.9175	25.4259	25.6074						1	1	1	4.1	4.1	4.1	36.877	0.0043573	2.2823	244540000	7	1	1	1	1	1	1	1	1	1	1
tr|B2B209|B2B209_PODAN Podospora anserina S mat+ genomic DNA chromosome 6, supercontig 2 OS=Podospora anserina (strain S / ATCC MYA-4624 / DSM 980 / FGSC 10383) OX=515849 GN=PODANS_6_5140 PE=3 SV=1	B2B209	B2B209					0.916885	0.649301	1.07281	0.187554	0.101398	0.490761	0.101398	0.490761	12	12	12	32.2594	32.4038	32.7026	32.2952	32.527	32.8478						12	12	12	54.4	54.4	54.4	32.426	0	136.5	37006000000	176	12	12	12	12	12	12	12	12	12	12
tr|B2AAM6|B2AAM6_PODAN Podospora anserina S mat+ genomic DNA chromosome 1, supercontig 1 OS=Podospora anserina (strain S / ATCC MYA-4624 / DSM 980 / FGSC 10383) OX=515849 GN=PODANS_1_4540 PE=3 SV=1	B2AAM6	B2AAM6					0.914589	0.646855	1.10539	0.189193	0.144557	0.494539	0.144557	0.494539	5	5	5	26.5935	27.3857	27.4717	27.2233	27.196	27.4652						5	5	5	22.1	22.1	22.1	23.459	0	20.428	962010000	21	3	4	5	4	3	4	3	4	5	4
tr|B2AX48|B2AX48_PODAN Podospora anserina S mat+ genomic DNA chromosome 7, supercontig 1 OS=Podospora anserina (strain S / ATCC MYA-4624 / DSM 980 / FGSC 10383) OX=515849 GN=PODANS_7_9300 PE=4 SV=1	B2AX48	B2AX48					0.913211	0.645291	1.04287	0.190244	0.0605526	0.496959	0.0605526	0.496959	1	1	1	24.3672	24.5185	24.6662	24.4107	24.6264	24.6964						1	1	1	11.7	11.7	11.7	13.744	0	10.977	147680000	10	1	1	1	1	1	1	1	1	1	1
tr|B2B031|B2B031_PODAN Glutathione reductase OS=Podospora anserina (strain S / ATCC MYA-4624 / DSM 980 / FGSC 10383) OX=515849 GN=PODANS_3_6140 PE=3 SV=1	B2B031	B2B031					0.912951	0.643758	1.06774	0.191277	0.0945644	0.499336	0.0945644	0.499336	13	13	13	29.9293	29.3496	29.5789	29.8865	29.632	29.6231						13	13	13	40	40	40	55.193	0	131.43	5159800000	54	11	11	7	11	8	9	11	11	7	11
tr|B2AT02|B2AT02_PODAN Podospora anserina S mat+ genomic DNA chromosome 6, supercontig 1 OS=Podospora anserina (strain S / ATCC MYA-4624 / DSM 980 / FGSC 10383) OX=515849 GN=PODANS_6_11790 PE=4 SV=1	B2AT02	B2AT02					0.91214	0.64196	1.12446	0.192492	0.169232	0.502127	0.169232	0.502127	5	5	5	28.6791	28.5881	29.1057	28.3983	29.075	29.4073						5	5	5	34.6	34.6	34.6	20.951	0	34.776	3052200000	47	5	5	5	4	5	4	5	5	5	4
tr|A0A090D6B6|A0A090D6B6_PODAN Putative actin-related protein 3 OS=Podospora anserina (strain S / ATCC MYA-4624 / DSM 980 / FGSC 10383) OX=515849 PE=3 SV=1	A0A090D6B6	A0A090D6B6					0.911785	0.639852	1.05627	0.19392	0.0789801	0.505404	0.0789801	0.505404	12	12	12	29.3933	29.3558	29.4709	29.1806	29.6316	29.6447						12	12	12	43.6	43.6	43.6	47.744	0	66.789	4415900000	50	7	8	7	8	9	8	7	8	7	8
tr|B2AMZ1|B2AMZ1_PODAN Protein kinase C OS=Podospora anserina (strain S / ATCC MYA-4624 / DSM 980 / FGSC 10383) OX=515849 GN=PODANS_6_8430 PE=3 SV=1	B2AMZ1	B2AMZ1					0.912149	0.639047	1.06299	0.194467	0.0881271	0.506658	0.0881271	0.506658	1	1	1	24.1954	24.4585	24.3219	24.36	24.173	24.7071						1	1	1	1.4	1.4	1.4	131.47	0	3.3206	131070000	3	1	1	1	1	1	1	1	1	1	1
tr|B2A9E4|B2A9E4_PODAN Podospora anserina S mat+ genomic DNA chromosome 1, supercontig 1 OS=Podospora anserina (strain S / ATCC MYA-4624 / DSM 980 / FGSC 10383) OX=515849 GN=PODANS_1_610 PE=3 SV=1	B2A9E4	B2A9E4					0.91178	0.637503	1.14131	0.195518	0.190685	0.509065	0.190685	0.509065	8	8	8	31.0152	31.5484	31.8305	32.2208	31.4712	31.2742						8	8	8	46	46	46	14.668	0	47.294	19709000000	92	8	8	8	7	8	7	8	8	8	7
tr|B2AQT8|B2AQT8_PODAN Podospora anserina S mat+ genomic DNA chromosome 4, supercontig 4 OS=Podospora anserina (strain S / ATCC MYA-4624 / DSM 980 / FGSC 10383) OX=515849 GN=PODANS_4_3200 PE=4 SV=1	B2AQT8	B2AQT8					0.90973	0.635881	1.06885	0.196624	0.0960585	0.511597	0.0960585	0.511597	6	6	6	29.1739	29.207	29.7309	29.5559	29.4682	29.3758						6	6	6	40.2	40.2	40.2	23.347	0	30.079	4345000000	25	6	4	5	6	5	6	6	4	5	6
tr|B2AWB2|B2AWB2_PODAN Podospora anserina S mat+ genomic DNA chromosome 7, supercontig 1 OS=Podospora anserina (strain S / ATCC MYA-4624 / DSM 980 / FGSC 10383) OX=515849 GN=PODANS_7_6570 PE=4 SV=1	B2AWB2	B2AWB2					0.909728	0.634848	1.13676	0.19733	0.184926	0.513212	0.184926	0.513212	3	3	3	27.4067	27.3851	27.3908	27.0665	27.3969	28.274						3	3	3	9.2	9.2	9.2	39.738	0	18.887	1171000000	11	2	2	3	3	3	3	2	2	3	3
tr|B2AMR5|B2AMR5_PODAN Podospora anserina S mat+ genomic DNA chromosome 5, supercontig 5 OS=Podospora anserina (strain S / ATCC MYA-4624 / DSM 980 / FGSC 10383) OX=515849 GN=PODANS_5_4950 PE=4 SV=1	B2AMR5	B2AMR5					0.909293	0.633934	1.12834	0.197956	0.174203	0.514642	0.174203	0.514642	12	12	12	30.0936	29.6364	30.1736	29.6679	30.0772	30.681						12	12	12	58	58	58	33.897	0	115.78	6905100000	57	9	10	11	8	11	10	9	10	11	8
tr|B2B532|B2B532_PODAN Podospora anserina S mat+ genomic DNA chromosome 2, supercontig 2 OS=Podospora anserina (strain S / ATCC MYA-4624 / DSM 980 / FGSC 10383) OX=515849 GN=PODANS_2_3350 PE=4 SV=1	B2B532	B2B532					0.910239	0.633545	1.06948	0.198223	0.0969137	0.515251	0.0969137	0.515251	3	3	3	27.8632	27.8238	28.2437	27.8794	28.0161	28.326						3	3	3	20.7	20.7	20.7	29.354	0	32.754	1654400000	30	3	3	3	3	3	3	3	3	3	3
tr|B2AW07|B2AW07_PODAN Podospora anserina S mat+ genomic DNA chromosome 7, supercontig 1 OS=Podospora anserina (strain S / ATCC MYA-4624 / DSM 980 / FGSC 10383) OX=515849 GN=PODANS_7_5520 PE=4 SV=1	B2AW07	B2AW07					0.909883	0.63218	1.36985	0.199159	0.454021	0.517389	0.454021	0.517389	3	3	3	24.4067	26.1626	24.26	24.5744	24.9829	26.6341						3	3	3	11	11	11	38.663	0	13.579	279740000	18	2	3	3	3	3	3	2	3	3	3
tr|B2B7P4|B2B7P4_PODAN Serine/threonine-protein phosphatase OS=Podospora anserina (strain S / ATCC MYA-4624 / DSM 980 / FGSC 10383) OX=515849 GN=PODANS_2_11780 PE=3 SV=1	B2B7P4	B2B7P4					0.910494	0.631949	1.11002	0.199318	0.150592	0.517751	0.150592	0.517751	2	2	2	27.2296	26.414	26.3397	26.7253	26.7883	26.9214						2	2	2	3.7	3.7	3.7	64.774	0	5.7534	685650000	9	2	2	2	2	2	2	2	2	2	2
tr|B2ANA5|B2ANA5_PODAN Citrate synthase OS=Podospora anserina (strain S / ATCC MYA-4624 / DSM 980 / FGSC 10383) OX=515849 GN=PODANS_6_10000 PE=3 SV=1	B2ANA5	B2ANA5					0.909979	0.627484	1.0367	0.202397	0.0520039	0.524768	0.0520039	0.524768	17	16	16	31.9877	31.766	31.7175	31.7681	31.9342	31.925						17	16	16	40.3	38	38	52.695	0	185.12	23311000000	131	13	14	14	14	15	13	12	13	13	13
tr|B2AXL7|B2AXL7_PODAN Podospora anserina S mat+ genomic DNA chromosome 7, supercontig 1 OS=Podospora anserina (strain S / ATCC MYA-4624 / DSM 980 / FGSC 10383) OX=515849 GN=PODANS_7_10990 PE=4 SV=1	B2AXL7	B2AXL7					0.911378	0.627035	1.31369	0.202708	0.393629	0.525475	0.393629	0.525475	1	1	1	26.0422	26.9143	25.9352	27.1854	25.3429	27.5444						1	1	1	2.7	2.7	2.7	51.855	0	24.145	650670000	4	1	1	1	1	1	1	1	1	1	1
tr|A0A090D427|A0A090D427_PODAN Putative maintenance of ploidy protein mob2 OS=Podospora anserina (strain S / ATCC MYA-4624 / DSM 980 / FGSC 10383) OX=515849 PE=4 SV=1	A0A090D427	A0A090D427					0.911891	0.626503	1.2629	0.203077	0.336735	0.526313	0.336735	0.526313	1	1	1	25.3869	25.1743	26.1641	25.0108	25.7727	26.9519						1	1	1	4.7	4.7	4.7	37.722	0	40.155	377890000	3	1	1	1	1	1	1	1	1	1	1
tr|B2B6I8|B2B6I8_PODAN Podospora anserina S mat+ genomic DNA chromosome 2, supercontig 2 OS=Podospora anserina (strain S / ATCC MYA-4624 / DSM 980 / FGSC 10383) OX=515849 GN=PODANS_2_7920 PE=3 SV=1	B2B6I8	B2B6I8					0.909133	0.623426	1.16707	0.205215	0.222889	0.531171	0.222889	0.531171	15	15	15	31.9629	32.1905	32.0222	31.4586	32.6123	32.7734						15	15	15	34.2	34.2	34.2	57.938	0	171.13	30310000000	138	14	13	14	13	14	14	14	13	14	13
tr|B2AY19|B2AY19_PODAN Podospora anserina S mat+ genomic DNA chromosome 1, supercontig 2 OS=Podospora anserina (strain S / ATCC MYA-4624 / DSM 980 / FGSC 10383) OX=515849 GN=PODANS_1_9590 PE=3 SV=1	B2AY19	B2AY19					0.905694	0.620309	1.19877	0.207392	0.261556	0.536106	0.261556	0.536106	8	8	8	31.9014	32.5478	32.6778	33.3969	32.5865	31.9282						8	8	8	55.5	55.5	55.5	12.399	0	94.878	39009000000	147	8	8	8	8	8	7	8	8	8	8
tr|B2B6C6|B2B6C6_PODAN Podospora anserina S mat+ genomic DNA chromosome 2, supercontig 2 OS=Podospora anserina (strain S / ATCC MYA-4624 / DSM 980 / FGSC 10383) OX=515849 GN=PODANS_2_7390 PE=4 SV=1	B2B6C6	B2B6C6					0.906333	0.61982	1.11733	0.207734	0.160056	0.536882	0.160056	0.536882	3	3	3	26.0564	25.6142	26.3179	25.9831	25.8998	26.5858						3	3	3	12.7	12.7	12.7	30.182	0	7.1756	434450000	11	1	1	1	1	1	3	1	1	1	1
tr|B2B085|B2B085_PODAN T-complex protein 1 subunit gamma OS=Podospora anserina (strain S / ATCC MYA-4624 / DSM 980 / FGSC 10383) OX=515849 GN=PODANS_3_8280 PE=3 SV=1	B2B085	B2B085					0.903252	0.617162	1.03653	0.209601	0.0517635	0.541106	0.0517635	0.541106	5	5	5	28.0989	28.0249	27.9613	28.2477	27.9558	28.0368						5	5	5	10	10	10	59.411	0	17.449	1676300000	21	4	4	4	4	4	5	4	4	4	4
tr|B2AWY8|B2AWY8_PODAN Podospora anserina S mat+ genomic DNA chromosome 7, supercontig 1 OS=Podospora anserina (strain S / ATCC MYA-4624 / DSM 980 / FGSC 10383) OX=515849 GN=PODANS_7_8740 PE=4 SV=1	B2AWY8	B2AWY8					0.897586	0.611659	1.23192	0.213491	0.300913	0.549885	0.300913	0.549885	2	2	2	26.3844	25.5273	25.9133	25.2703	26.6564	26.8009						2	2	2	18.3	18.3	18.3	13.341	0	28.152	462310000	5	2	2	2	2	2	2	2	2	2	2
tr|A0A090D562|A0A090D562_PODAN Imidazoleglycerol-phosphate dehydratase OS=Podospora anserina (strain S / ATCC MYA-4624 / DSM 980 / FGSC 10383) OX=515849 PE=3 SV=1	A0A090D562	A0A090D562					0.898306	0.610958	1.09027	0.213989	0.124683	0.551006	0.124683	0.551006	5	5	5	27.3693	27.8719	27.4428	27.3939	27.9583	27.7058						5	5	5	20.3	20.3	20.3	24.68	0	23.636	1257500000	16	3	2	4	3	3	2	3	2	4	3
tr|A0A090CTU2|A0A090CTU2_PODAN Uncharacterized protein OS=Podospora anserina (strain S / ATCC MYA-4624 / DSM 980 / FGSC 10383) OX=515849 PE=4 SV=1	A0A090CTU2	A0A090CTU2					0.896702	0.608343	1.13567	0.215852	0.183546	0.555198	0.183546	0.555198	2	2	2	27.6162	27.7294	28.5741	27.9071	28.366	28.1972						2	2	2	28.9	28.9	28.9	10.232	0	41.275	1745500000	20	2	2	2	2	2	2	2	2	2	2
tr|B2B5Y8|B2B5Y8_PODAN Glycine cleavage system H protein OS=Podospora anserina (strain S / ATCC MYA-4624 / DSM 980 / FGSC 10383) OX=515849 GN=PODANS_2_6200 PE=3 SV=1	B2B5Y8	B2B5Y8					0.88981	0.599529	1.06041	0.22219	0.0846176	0.569412	0.0846176	0.569412	4	4	4	30.3937	30.572	30.8861	30.673	30.7753	30.6573						4	4	4	40.9	40.9	40.9	18.553	0	59.005	10234000000	56	4	4	4	4	4	4	4	4	4	4
tr|B2B0K4|B2B0K4_PODAN Podospora anserina S mat+ genomic DNA chromosome 3, supercontig 2 OS=Podospora anserina (strain S / ATCC MYA-4624 / DSM 980 / FGSC 10383) OX=515849 GN=PODANS_3_5760 PE=3 SV=1	B2B0K4	B2B0K4					0.889118	0.598437	1.06493	0.222981	0.0907599	0.571182	0.0907599	0.571182	11	11	11	29.6064	29.7299	30.0562	29.8451	29.7672	30.0525						11	11	11	37.1	37.1	37.1	38.595	0	82.071	5827300000	46	9	11	10	9	9	10	9	11	10	9
tr|B2B0Y1|B2B0Y1_PODAN Succinate--CoA ligase [ADP-forming] subunit beta, mitochondrial OS=Podospora anserina (strain S / ATCC MYA-4624 / DSM 980 / FGSC 10383) OX=515849 GN=PODANS_3_7700 PE=3 SV=1	B2B0Y1	B2B0Y1					0.887331	0.596828	1.08964	0.224151	0.12385	0.573794	0.12385	0.573794	6	6	6	30.0073	29.5829	29.7478	29.561	29.9956	30.1529						6	6	6	16.1	16.1	16.1	48.247	0	112.67	5861700000	41	6	6	5	5	6	5	6	6	5	5
tr|B2AEC9|B2AEC9_PODAN Aminopeptidase OS=Podospora anserina (strain S / ATCC MYA-4624 / DSM 980 / FGSC 10383) OX=515849 GN=PODANS_5_3000 PE=3 SV=1	B2AEC9	B2AEC9					0.887082	0.596099	1.20442	0.224681	0.268343	0.574979	0.268343	0.574979	2	2	2	25.3015	24.0002	24.3711	25.2981	24.3979	24.7818						2	2	2	4.4	4.4	4.4	100.07	0	11.971	172040000	3	1	2	1	1	1	1	1	2	1	1
tr|A0A090CCJ7|A0A090CCJ7_PODAN Uncharacterized protein OS=Podospora anserina (strain S / ATCC MYA-4624 / DSM 980 / FGSC 10383) OX=515849 PE=3 SV=1	A0A090CCJ7	A0A090CCJ7					0.885508	0.594378	1.10375	0.225938	0.142419	0.577781	0.142419	0.577781	2	2	2	27.4597	27.0307	27.071	26.9516	27.3807	27.6564						2	2	2	11.9	11.9	11.9	20.597	0	59.408	978770000	11	2	2	2	2	2	2	2	2	2	2
tr|B2AXD2|B2AXD2_PODAN 40S ribosomal protein S12 OS=Podospora anserina (strain S / ATCC MYA-4624 / DSM 980 / FGSC 10383) OX=515849 GN=PODANS_7_10160 PE=3 SV=1	B2AXD2	B2AXD2					0.882946	0.591643	1.23111	0.22794	0.299957	0.582243	0.299957	0.582243	10	10	10	31.7229	32.2294	32.4327	33.3464	32.1436	31.7948						10	10	10	67.8	67.8	67.8	13.485	0	138.27	33793000000	158	9	9	9	10	8	8	9	9	9	10
tr|B2A8Q7|B2A8Q7_PODAN 60S ribosomal protein L36 OS=Podospora anserina (strain S / ATCC MYA-4624 / DSM 980 / FGSC 10383) OX=515849 GN=PODANS_1_7060 PE=3 SV=1	B2A8Q7	B2A8Q7					0.883897	0.591599	1.14549	0.227972	0.195964	0.582314	0.195964	0.582314	5	5	4	30.4328	30.9627	31.2253	31.3963	31.2171	30.5952						5	5	4	33.9	33.9	24.8	12.297	0	28.606	13009000000	32	4	4	5	5	4	4	4	4	5	5
tr|B2AT30|B2AT30_PODAN Podospora anserina S mat+ genomic DNA chromosome 1, supercontig 4 OS=Podospora anserina (strain S / ATCC MYA-4624 / DSM 980 / FGSC 10383) OX=515849 GN=PODANS_1_14500 PE=4 SV=1	B2AT30	B2AT30					0.884733	0.591151	1.15088	0.228301	0.202733	0.583047	0.202733	0.583047	7	7	7	32.4119	33.2193	33.423	33.5	33.2165	32.9459						7	7	7	50.6	50.6	50.6	17.647	0	69.821	58424000000	115	7	7	7	7	7	7	7	7	7	7
tr|B2B752|B2B752_PODAN Podospora anserina S mat+ genomic DNA chromosome 2, supercontig 2 OS=Podospora anserina (strain S / ATCC MYA-4624 / DSM 980 / FGSC 10383) OX=515849 GN=PODANS_2_9930 PE=4 SV=1	B2B752	B2B752					0.885169	0.590878	1.06711	0.228502	0.0937061	0.583493	0.0937061	0.583493	3	3	3	26.8287	26.4002	26.7887	26.7153	26.931	26.6524						3	3	3	11.4	11.4	11.4	39.486	0	22.066	667290000	9	2	2	2	3	2	2	2	2	2	3
tr|B2AX21|B2AX21_PODAN Podospora anserina S mat+ genomic DNA chromosome 7, supercontig 1 OS=Podospora anserina (strain S / ATCC MYA-4624 / DSM 980 / FGSC 10383) OX=515849 GN=PODANS_7_9060 PE=4 SV=1	B2AX21	B2AX21					0.881722	0.584272	1.49542	0.233385	0.580554	0.594337	0.580554	0.594337	4	4	4	27.9554	27.7892	27.8508	30.394	27.5644	27.3787						4	4	4	31.5	31.5	31.5	15.568	0	51.527	2518100000	33	4	4	4	4	4	4	4	4	4	4
tr|A0A090CG25|A0A090CG25_PODAN Putative aminotransferase OS=Podospora anserina (strain S / ATCC MYA-4624 / DSM 980 / FGSC 10383) OX=515849 PE=4 SV=1	A0A090CG25	A0A090CG25					0.883887	0.582875	1.03688	0.234425	0.0522461	0.596641	0.0522461	0.596641	5	5	5	27.6887	27.805	27.5952	27.7206	27.8691	27.6559						5	5	5	16.5	16.5	16.5	47.46	0	29.427	1331400000	17	4	4	5	4	5	4	4	4	5	4
tr|B2B6R1|B2B6R1_PODAN Podospora anserina S mat+ genomic DNA chromosome 2, supercontig 2 OS=Podospora anserina (strain S / ATCC MYA-4624 / DSM 980 / FGSC 10383) OX=515849 GN=PODANS_2_8560 PE=3 SV=1	B2B6R1	B2B6R1					0.883608	0.581687	1.2828	0.235311	0.359294	0.598602	0.359294	0.598602	3	3	3	23.6298	24.7348	25.1619	25.4512	25.0246	24.1286						3	3	3	20.2	20.2	20.2	13.492	0	6.7492	176790000	10	2	3	3	3	3	3	2	3	3	3
tr|B2B6A7|B2B6A7_PODAN Podospora anserina S mat+ genomic DNA chromosome 2, supercontig 2 OS=Podospora anserina (strain S / ATCC MYA-4624 / DSM 980 / FGSC 10383) OX=515849 GN=PODANS_2_7200 PE=4 SV=1	B2B6A7	B2B6A7					0.881474	0.580241	1.30225	0.236392	0.381003	0.600993	0.381003	0.600993	8	8	8	30.6172	29.7917	30.0223	29.395	30.8306	31.3486						8	8	8	51	51	51	27.676	0	154.14	9017100000	78	8	8	7	7	8	8	8	8	7	7
sp|B2B0E2|KAD2_PODAN Adenylate kinase OS=Podospora anserina (strain S / ATCC MYA-4624 / DSM 980 / FGSC 10383) OX=515849 GN=ADK1 PE=3 SV=1	B2B0E2	B2B0E2					0.882336	0.580048	1.06698	0.236536	0.093537	0.601313	0.093537	0.601313	10	10	10	30.8418	30.7797	31.1977	31.0184	30.8939	31.1875						10	10	10	35.1	35.1	35.1	30.373	0	70.376	12906000000	77	8	10	10	9	10	10	8	10	10	9
tr|B2AL09|B2AL09_PODAN Podospora anserina S mat+ genomic DNA chromosome 5, supercontig 9 OS=Podospora anserina (strain S / ATCC MYA-4624 / DSM 980 / FGSC 10383) OX=515849 GN=PODANS_5_9570 PE=3 SV=1	B2AL09	B2AL09					0.877939	0.573729	1.10408	0.241293	0.142839	0.61181	0.142839	0.61181	2	2	2	27.1471	27.8791	27.68	27.5472	27.7936	27.7938						2	2	2	12.2	12.2	12.2	16.504	0	3.1251	1272000000	11	2	2	2	2	2	1	2	2	2	2
tr|A0A090CIS0|A0A090CIS0_PODAN Putative transesterase OS=Podospora anserina (strain S / ATCC MYA-4624 / DSM 980 / FGSC 10383) OX=515849 PE=4 SV=1	A0A090CIS0	A0A090CIS0					0.878204	0.573191	1.65941	0.241701	0.730673	0.612709	0.730673	0.612709	6	6	6	25.2512	27.1757	27.444	25.4217	28.1345	28.5067						6	6	6	27.9	27.9	27.9	44.92	0	103.41	1099400000	13	3	5	4	4	6	6	3	5	4	4
tr|B2B5H6|B2B5H6_PODAN Succinate--CoA ligase [ADP-forming] subunit alpha, mitochondrial OS=Podospora anserina (strain S / ATCC MYA-4624 / DSM 980 / FGSC 10383) OX=515849 GN=PODANS_2_4710 PE=3 SV=1	B2B5H6	B2B5H6					0.878659	0.572984	1.04245	0.241858	0.0599842	0.613054	0.0599842	0.613054	8	8	8	31.2536	31.2069	31.5136	31.4024	31.3415	31.4101						8	8	8	26.8	26.8	26.8	34.648	0	270.28	16518000000	111	8	7	8	8	8	8	8	7	8	8
tr|B2AMZ0|B2AMZ0_PODAN Podospora anserina S mat+ genomic DNA chromosome 6, supercontig 4 OS=Podospora anserina (strain S / ATCC MYA-4624 / DSM 980 / FGSC 10383) OX=515849 GN=PODANS_6_8420 PE=3 SV=1	B2AMZ0	B2AMZ0					0.877819	0.571151	1.09044	0.243249	0.124913	0.616116	0.124913	0.616116	10	10	10	30.7416	30.2942	30.589	30.9751	30.5251	30.4993						10	10	10	34	34	34	47.919	0	113.81	10195000000	74	9	10	9	9	9	8	9	10	9	9
tr|A0A090D4N1|A0A090D4N1_PODAN Putative oxidoreductase OS=Podospora anserina (strain S / ATCC MYA-4624 / DSM 980 / FGSC 10383) OX=515849 PE=4 SV=1	A0A090D4N1	A0A090D4N1					0.878026	0.56969	2.6215	0.244362	1.39039	0.618562	1.39039	0.618562	4	4	4	21.5038	28.2814	27.5114	26.1698	26.8379	28.4602						4	4	4	26.1	26.1	26.1	27.544	0	59.614	1085300000	8	3	4	4	4	3	3	3	4	4	4
tr|A0A090CA01|A0A090CA01_PODAN Dipeptidyl peptidase 3 OS=Podospora anserina (strain S / ATCC MYA-4624 / DSM 980 / FGSC 10383) OX=515849 PE=3 SV=1	A0A090CA01	A0A090CA01					0.878757	0.569025	1.20469	0.244869	0.268663	0.619676	0.268663	0.619676	5	5	5	27.7288	26.2585	26.7295	27.1761	27.1597	27.1871						5	5	5	10.4	10.4	10.4	84.017	0	17.071	868360000	12	5	3	4	3	2	3	5	3	4	3
tr|B2A8Z0|B2A8Z0_PODAN Eukaryotic translation initiation factor 3 subunit M OS=Podospora anserina (strain S / ATCC MYA-4624 / DSM 980 / FGSC 10383) OX=515849 GN=PODANS_1_7870 PE=3 SV=1	B2A8Z0	B2A8Z0					0.877149	0.563956	1.04957	0.248755	0.0697994	0.628201	0.0697994	0.628201	7	7	7	28.7149	28.8177	29.0076	28.8681	28.8257	29.0558						7	7	7	11.4	11.4	11.4	62.283	0	57.669	2977200000	33	4	5	6	4	7	6	4	5	6	4
tr|B2B830|B2B830_PODAN Podospora anserina S mat+ genomic DNA chromosome 2, supercontig 2 OS=Podospora anserina (strain S / ATCC MYA-4624 / DSM 980 / FGSC 10383) OX=515849 GN=PODANS_2_13120 PE=4 SV=1	B2B830	B2B830					0.878127	0.563914	1.1172	0.248787	0.159885	0.628272	0.159885	0.628272	6	6	6	28.9649	28.815	29.3469	28.8379	29.2443	29.5242						6	6	6	26.4	26.4	26.4	30.485	0	130.63	3566900000	41	5	5	6	5	5	5	5	5	6	5
sp|B2AR67|TVP18_PODAN Golgi apparatus membrane protein TVP18 OS=Podospora anserina (strain S / ATCC MYA-4624 / DSM 980 / FGSC 10383) OX=515849 GN=TVP18 PE=3 SV=1	B2AR67	B2AR67					0.874707	0.55933	1.07228	0.252332	0.100688	0.636026	0.100688	0.636026	2	2	2	27.5748	28.0723	27.7512	27.8158	27.8634	28.0212						2	2	2	14.4	14.4	14.4	16.427	0	24.643	1460900000	28	2	2	2	2	2	2	2	2	2	2
tr|B2ATU6|B2ATU6_PODAN Podospora anserina S mat+ genomic DNA chromosome 1, supercontig 4 OS=Podospora anserina (strain S / ATCC MYA-4624 / DSM 980 / FGSC 10383) OX=515849 GN=PODANS_1_17000 PE=4 SV=1	B2ATU6	B2ATU6					0.874092	0.558056	1.07384	0.253322	0.102774	0.63819	0.102774	0.63819	12	12	12	34.0641	34.0709	34.4745	34.1569	34.3036	34.4573						12	12	12	72.5	72.5	72.5	23.174	0	261.16	123930000000	205	12	10	11	11	12	12	12	10	11	11
tr|B2VLF5|B2VLF5_PODAN Aconitate hydratase, mitochondrial OS=Podospora anserina (strain S / ATCC MYA-4624 / DSM 980 / FGSC 10383) OX=515849 GN=PODANS_5_5970 PE=3 SV=1	B2VLF5	B2VLF5					0.874794	0.557819	1.11709	0.253507	0.159743	0.638592	0.159743	0.638592	9	9	9	29.7488	29.1695	29.5508	29.2831	29.8133	29.852						9	9	9	15.6	15.6	15.6	85.164	0	33.829	4858200000	64	8	7	8	8	9	7	8	7	8	8
tr|B2AMP3|B2AMP3_PODAN Podospora anserina S mat+ genomic DNA chromosome 5, supercontig 5 OS=Podospora anserina (strain S / ATCC MYA-4624 / DSM 980 / FGSC 10383) OX=515849 GN=PODANS_5_4690 PE=4 SV=1	B2AMP3	B2AMP3					0.875313	0.557673	1.06356	0.25362	0.0889072	0.638841	0.0889072	0.638841	12	12	12	31.7072	31.8814	32.0612	31.7832	32.0676	32.0657						12	12	12	54.9	54.9	54.9	25.134	0	95.57	24635000000	102	10	10	12	11	12	11	10	10	12	11
tr|B2AE44|B2AE44_PODAN Podospora anserina S mat+ genomic DNA chromosome 4, supercontig 2 OS=Podospora anserina (strain S / ATCC MYA-4624 / DSM 980 / FGSC 10383) OX=515849 GN=PODANS_4_2800 PE=4 SV=1	B2AE44	B2AE44					0.869764	0.552557	1.08051	0.257623	0.111713	0.647565	0.111713	0.647565	4	4	4	29.4393	29.2494	29.7142	29.4821	29.794	29.462						4	4	4	42.8	42.8	42.8	21.764	0	86.536	4667200000	33	4	4	4	4	4	3	4	4	4	4
tr|B2AAE6|B2AAE6_PODAN Podospora anserina S mat+ genomic DNA chromosome 1, supercontig 1 OS=Podospora anserina (strain S / ATCC MYA-4624 / DSM 980 / FGSC 10383) OX=515849 GN=PODANS_1_3740 PE=4 SV=1	B2AAE6	B2AAE6					0.864808	0.548239	1.1613	0.26103	0.215741	0.654972	0.215741	0.654972	2	2	2	28.9636	28.4497	29.2588	28.8981	28.8566	29.5645						2	2	2	27.8	27.8	27.8	9.7688	0	27.826	4259700000	33	2	2	2	2	2	2	2	2	2	2
tr|B2AXQ3|B2AXQ3_PODAN Uricase OS=Podospora anserina (strain S / ATCC MYA-4624 / DSM 980 / FGSC 10383) OX=515849 GN=PODANS_7_11330 PE=3 SV=1	B2AXQ3	B2AXQ3					0.861296	0.544086	1.24506	0.264332	0.316212	0.662135	0.316212	0.662135	13	13	13	32.2621	32.1514	32.331	33.5136	32.0749	32.1046						13	13	13	48.3	48.3	48.3	33.265	0	170.4	36747000000	121	11	11	12	13	12	10	11	11	12	13
tr|B2B2A1|B2B2A1_PODAN Podospora anserina S mat+ genomic DNA chromosome 6, supercontig 2 OS=Podospora anserina (strain S / ATCC MYA-4624 / DSM 980 / FGSC 10383) OX=515849 GN=PODANS_6_6020 PE=3 SV=1	B2B2A1	B2B2A1					0.85902	0.542026	1.1601	0.26598	0.214247	0.665702	0.214247	0.665702	1	1	1	26.4063	26.4473	27.0294	26.8861	26.3865	27.2532						1	1	1	3.3	3.3	3.3	35.547	0	5.1641	694130000	8	1	1	1	1	1	1	1	1	1	1
tr|B2AM46|B2AM46_PODAN Podospora anserina S mat+ genomic DNA chromosome 1, supercontig 3 OS=Podospora anserina (strain S / ATCC MYA-4624 / DSM 980 / FGSC 10383) OX=515849 GN=PODANS_1_14230 PE=4 SV=1	B2AM46	B2AM46					0.859995	0.542006	1.2087	0.265996	0.273457	0.665737	0.273457	0.665737	4	4	4	30.2112	30.7041	30.801	31.5608	30.6378	30.3381						4	4	4	31.6	31.6	31.6	11.011	0	61.243	11126000000	55	4	4	4	4	4	4	4	4	4	4
tr|B2AWK5|B2AWK5_PODAN Very-long-chain (3R)-3-hydroxyacyl-CoA dehydratase OS=Podospora anserina (strain S / ATCC MYA-4624 / DSM 980 / FGSC 10383) OX=515849 GN=PODANS_7_7470 PE=3 SV=1	B2AWK5	B2AWK5					0.855932	0.538032	1.86359	0.269192	0.898083	0.672646	0.898083	0.672646	1	1	1	23.3554	23.2876	27.2663	25.2329	25.3833	25.9874						1	1	1	7.7	7.7	7.7	26.244	0.00074239	2.5772	332120000	1	1	1	1	1	1	1	1	1	1	1
tr|B2AW14|B2AW14_PODAN Podospora anserina S mat+ genomic DNA chromosome 7, supercontig 1 OS=Podospora anserina (strain S / ATCC MYA-4624 / DSM 980 / FGSC 10383) OX=515849 GN=PODANS_7_5590 PE=3 SV=1	B2AW14	B2AW14					0.852425	0.53547	1.07739	0.271265	0.10754	0.677118	0.10754	0.677118	11	11	11	28.5934	28.3246	28.8609	28.6846	28.6487	28.7682						11	11	11	17.8	17.8	17.8	90.429	0	65.637	2538200000	31	7	8	8	7	7	9	7	8	8	7
tr|B2AWU6|B2AWU6_PODAN Podospora anserina S mat+ genomic DNA chromosome 7, supercontig 1 OS=Podospora anserina (strain S / ATCC MYA-4624 / DSM 980 / FGSC 10383) OX=515849 GN=PODANS_7_8370 PE=4 SV=1	B2AWU6	B2AWU6					0.847899	0.531508	1.19933	0.27449	0.262229	0.684065	0.262229	0.684065	4	4	4	26.9459	26.6306	26.6037	27.6838	26.8479	26.4352						4	4	4	8.3	8.3	8.3	82.434	0	25.962	762280000	10	3	3	3	3	1	2	3	3	3	3
tr|A0A090D451|A0A090D451_PODAN Putative Poly(RC)-binding protein 1 OS=Podospora anserina (strain S / ATCC MYA-4624 / DSM 980 / FGSC 10383) OX=515849 PE=4 SV=1	A0A090D451	A0A090D451					0.8465	0.53044	1.19034	0.275364	0.251371	0.685945	0.251371	0.685945	1	1	1	22.4748	22.1984	23.0809	23.2626	22.3725	22.8732						1	1	1	2.5	2.5	2.5	51.138	0	4.9777	42690000	2	1	1	1	1	1	1	1	1	1	1
tr|B2B4E1|B2B4E1_PODAN Podospora anserina S mat+ genomic DNA chromosome 2, supercontig 2 OS=Podospora anserina (strain S / ATCC MYA-4624 / DSM 980 / FGSC 10383) OX=515849 GN=PODANS_2_970 PE=4 SV=1	B2B4E1	B2B4E1					0.846576	0.52954	1.09584	0.276101	0.132036	0.68753	0.132036	0.68753	3	3	3	27.2313	27.648	27.7048	27.8941	27.5953	27.4908						3	3	3	13.3	13.3	13.3	27.561	0	9.7692	1227500000	16	3	3	3	3	3	3	3	3	3	3
tr|B2AUX0|B2AUX0_PODAN Podospora anserina S mat+ genomic DNA chromosome 7, supercontig 1 OS=Podospora anserina (strain S / ATCC MYA-4624 / DSM 980 / FGSC 10383) OX=515849 GN=PODANS_7_4830 PE=4 SV=1	B2AUX0	B2AUX0					0.845404	0.524636	1.09103	0.280142	0.125696	0.696204	0.125696	0.696204	10	10	10	30.4766	30.3454	29.9018	30.334	30.3044	30.4625						10	10	10	75.4	75.4	75.4	18.738	0	174.56	8032000000	86	9	7	7	7	8	7	9	7	7	7
tr|B2AEC3|B2AEC3_PODAN Podospora anserina S mat+ genomic DNA chromosome 5, supercontig 1 OS=Podospora anserina (strain S / ATCC MYA-4624 / DSM 980 / FGSC 10383) OX=515849 GN=PODANS_5_3060 PE=4 SV=1	B2AEC3	B2AEC3					0.842636	0.521811	1.16811	0.282487	0.224173	0.701228	0.224173	0.701228	11	11	11	31.7692	31.685	32.2543	32.4855	31.6074	32.288						11	11	11	57	57	57	25.115	0	251.59	26764000000	156	10	10	10	11	10	11	10	10	10	11
tr|B2B269|B2B269_PODAN Podospora anserina S mat+ genomic DNA chromosome 6, supercontig 2 OS=Podospora anserina (strain S / ATCC MYA-4624 / DSM 980 / FGSC 10383) OX=515849 GN=PODANS_6_5740 PE=3 SV=1	B2B269	B2B269					0.84292	0.520921	1.06891	0.283228	0.0961431	0.702813	0.0961431	0.702813	8	8	8	30.5749	30.6701	31.0007	30.8375	30.9268	30.7698						8	8	8	66.2	66.2	66.2	16.871	0	323.31	11247000000	79	7	8	7	8	8	7	7	8	7	8
tr|A0A090C9C9|A0A090C9C9_PODAN Cytidine deaminase OS=Podospora anserina (strain S / ATCC MYA-4624 / DSM 980 / FGSC 10383) OX=515849 PE=3 SV=1	A0A090C9C9	A0A090C9C9					0.839967	0.517318	1.15839	0.286243	0.212117	0.709258	0.212117	0.709258	3	3	3	29.1996	29.0828	29.312	29.9649	29.2894	28.9765						3	3	3	21.9	21.9	21.9	19.622	0	67.817	4083800000	34	3	2	3	3	3	3	3	2	3	3
tr|B2AE17|B2AE17_PODAN Podospora anserina S mat+ genomic DNA chromosome 4, supercontig 2 OS=Podospora anserina (strain S / ATCC MYA-4624 / DSM 980 / FGSC 10383) OX=515849 GN=PODANS_4_2545 PE=4 SV=1	B2AE17	B2AE17					0.840098	0.516637	1.46395	0.286815	0.549868	0.710479	0.549868	0.710479	2	2	2	22.3761	23.9476	24.3422	23.1632	24.7989	24.3534						2	2	2	36.5	36.5	36.5	10.519	0	4.9112	102910000	17	1	1	1	1	2	1	1	1	1	1
tr|B2B7S6|B2B7S6_PODAN Podospora anserina S mat+ genomic DNA chromosome 2, supercontig 2 OS=Podospora anserina (strain S / ATCC MYA-4624 / DSM 980 / FGSC 10383) OX=515849 GN=PODANS_2_12100 PE=3 SV=1	B2B7S6	B2B7S6					0.837862	0.513732	1.21363	0.289263	0.279329	0.715703	0.279329	0.715703	1	1	1	25.0749	26.0184	25.8217	26.4092	25.8393	25.5045						1	1	1	4.7	4.7	4.7	33.577	0	11.299	359380000	7	1	1	1	1	1	1	1	1	1	1
tr|B2ATI7|B2ATI7_PODAN Podospora anserina S mat+ genomic DNA chromosome 1, supercontig 4 OS=Podospora anserina (strain S / ATCC MYA-4624 / DSM 980 / FGSC 10383) OX=515849 GN=PODANS_1_16000 PE=4 SV=1	B2ATI7	B2ATI7					0.839489	0.512651	1.09546	0.290179	0.131538	0.717653	0.131538	0.717653	23	23	23	33.8041	33.3941	33.5663	33.4801	33.9634	33.7156						23	23	23	57.4	57.4	57.4	53.922	0	323.31	82362000000	279	23	23	23	22	22	22	23	23	23	22
tr|B2AQY9|B2AQY9_PODAN Polyadenylate-binding protein OS=Podospora anserina (strain S / ATCC MYA-4624 / DSM 980 / FGSC 10383) OX=515849 GN=PODANS_4_9240 PE=3 SV=1	B2AQY9	B2AQY9					0.837739	0.510234	1.17333	0.292231	0.230609	0.722023	0.230609	0.722023	8	8	8	28.1995	28.3629	28.8536	29.2054	28.428	28.4745						8	8	8	11.9	11.9	11.9	86.778	0	70.87	2520400000	44	7	6	8	7	7	6	7	6	8	7
tr|A0A090CTS5|A0A090CTS5_PODAN Putative rhamnose biosynthetic enzyme OS=Podospora anserina (strain S / ATCC MYA-4624 / DSM 980 / FGSC 10383) OX=515849 PE=4 SV=1	A0A090CTS5	A0A090CTS5					0.838725	0.510157	1.17482	0.292296	0.232438	0.722161	0.232438	0.722161	4	4	4	28.5745	28.6195	28.3945	28.1585	28.9105	29.2169						4	4	4	7.6	7.6	7.6	48.42	0	74.389	2593200000	60	4	4	4	3	4	4	4	4	4	3
tr|B2B4J8|B2B4J8_PODAN Podospora anserina S mat+ genomic DNA chromosome 2, supercontig 2 OS=Podospora anserina (strain S / ATCC MYA-4624 / DSM 980 / FGSC 10383) OX=515849 GN=PODANS_2_1530 PE=3 SV=1	B2B4J8	B2B4J8					0.840236	0.50942	1.21152	0.292924	0.276816	0.723497	0.276816	0.723497	5	5	5	27.231	27.9647	28.4945	28.3847	28.1238	28.0122						5	5	5	50.8	50.8	50.8	13.177	0	24.353	1711300000	17	4	4	4	5	4	3	4	4	4	5
tr|B2AFW3|B2AFW3_PODAN Podospora anserina S mat+ genomic DNA chromosome 7, supercontig 2 OS=Podospora anserina (strain S / ATCC MYA-4624 / DSM 980 / FGSC 10383) OX=515849 GN=PODANS_0_1350 PE=3 SV=1	B2AFW3	B2AFW3					0.838043	0.505703	1.16223	0.296105	0.216901	0.730256	0.216901	0.730256	4	4	4	27.3738	26.8437	27.5564	27.8462	27.4449	27.1336						4	4	4	9.1	9.1	9.1	72.899	0	99.096	1063000000	14	3	4	4	4	3	3	3	4	4	4
tr|B2B2M8|B2B2M8_PODAN Podospora anserina S mat+ genomic DNA chromosome 6, supercontig 2 OS=Podospora anserina (strain S / ATCC MYA-4624 / DSM 980 / FGSC 10383) OX=515849 GN=PODANS_6_2660 PE=4 SV=1	B2B2M8	B2B2M8					0.835229	0.50403	1.09309	0.297544	0.128418	0.73331	0.128418	0.73331	39	39	39	32.963	32.7288	32.9141	32.6796	33.122	33.1896						39	39	39	53.3	53.3	53.3	93.255	0	323.31	49657000000	372	36	36	36	32	36	37	36	36	36	32
tr|B2B1U9|B2B1U9_PODAN Podospora anserina S mat+ genomic DNA chromosome 6, supercontig 2 OS=Podospora anserina (strain S / ATCC MYA-4624 / DSM 980 / FGSC 10383) OX=515849 GN=PODANS_6_4520 PE=4 SV=1	B2B1U9	B2B1U9					0.83529	0.503662	4.11966	0.297861	2.04252	0.733983	2.04252	0.733983	3	3	3	27.104	19.0163	26.9532	24.8409	27.1222	27.238						3	3	3	8.2	8.2	8.2	53.043	0	13.426	609130000	14	3	1	3	1	2	2	3	1	3	1
tr|B2AWI2|B2AWI2_PODAN Podospora anserina S mat+ genomic DNA chromosome 7, supercontig 1 OS=Podospora anserina (strain S / ATCC MYA-4624 / DSM 980 / FGSC 10383) OX=515849 GN=PODANS_7_7250 PE=4 SV=1	B2AWI2	B2AWI2					0.8321	0.500313	1.34758	0.300758	0.430367	0.740122	0.430367	0.740122	2	2	2	25.281	26.4496	24.5891	25.7041	25.6226	26.284						2	2	2	9.1	9.1	9.1	31.561	0	8.3942	345690000	7	1	2	2	1	2	2	1	2	2	1
tr|A0A090CNA2|A0A090CNA2_PODAN Arginase OS=Podospora anserina (strain S / ATCC MYA-4624 / DSM 980 / FGSC 10383) OX=515849 PE=3 SV=1	A0A090CNA2	A0A090CNA2					0.832545	0.500108	1.0984	0.300937	0.135399	0.740499	0.135399	0.740499	9	9	9	31.3682	31.2938	31.3289	31.8271	31.2539	31.3162						9	9	9	20.7	20.7	20.7	39.727	0	323.31	17278000000	91	7	7	8	7	8	9	7	7	8	7
tr|B2B4U4|B2B4U4_PODAN Podospora anserina S mat+ genomic DNA chromosome 2, supercontig 2 OS=Podospora anserina (strain S / ATCC MYA-4624 / DSM 980 / FGSC 10383) OX=515849 GN=PODANS_2_2490 PE=4 SV=1	B2B4U4	B2B4U4					0.832383	0.499434	1.22828	0.301522	0.29664	0.741738	0.29664	0.741738	11	11	11	33.0859	33.67	33.8406	34.4589	33.6732	33.3543						11	11	11	61.1	61.1	61.1	14.28	0	128.35	86584000000	164	10	10	10	11	9	10	10	10	10	11
tr|B2ALH9|B2ALH9_PODAN Podospora anserina S mat+ genomic DNA chromosome 5, supercontig 4 OS=Podospora anserina (strain S / ATCC MYA-4624 / DSM 980 / FGSC 10383) OX=515849 GN=PODANS_5_3665 PE=4 SV=1	B2ALH9	B2ALH9					0.834029	0.497768	1.28707	0.302973	0.364094	0.744807	0.364094	0.744807	1	1	1	24.1575	24.83	24.7884	24.1046	25.2053	25.5584						1	1	1	7.6	7.6	7.6	14.221	0	7.4667	183650000	11	1	1	1	1	1	1	1	1	1	1
tr|B2AZ67|B2AZ67_PODAN Podospora anserina S mat+ genomic DNA chromosome 3, supercontig 2 OS=Podospora anserina (strain S / ATCC MYA-4624 / DSM 980 / FGSC 10383) OX=515849 GN=PODANS_3_4300 PE=4 SV=1	B2AZ67	B2AZ67					0.833448	0.496848	1.69087	0.303776	0.757764	0.746506	0.757764	0.746506	2	2	2	24.1024	27.3178	26.8687	26.5972	27.0801	26.8848						2	2	2	7	7	7	49.525	0	19.794	675150000	4	1	2	2	2	1	1	1	2	2	2
tr|B2AUR8|B2AUR8_PODAN Podospora anserina S mat+ genomic DNA chromosome 1, supercontig 4 OS=Podospora anserina (strain S / ATCC MYA-4624 / DSM 980 / FGSC 10383) OX=515849 GN=PODANS_1_20060 PE=3 SV=1	B2AUR8	B2AUR8					0.835216	0.496473	1.17439	0.304105	0.231909	0.747199	0.231909	0.747199	7	7	7	27.4248	28.129	28.3336	28.4446	28.1907	27.9478						7	7	7	62.7	62.7	62.7	16.857	0	20.777	1742600000	39	5	6	7	6	6	6	5	6	7	6
tr|B2B587|B2B587_PODAN Podospora anserina S mat+ genomic DNA chromosome 2, supercontig 2 OS=Podospora anserina (strain S / ATCC MYA-4624 / DSM 980 / FGSC 10383) OX=515849 GN=PODANS_2_3860 PE=4 SV=1	B2B587	B2B587					0.837013	0.496064	1.18821	0.304462	0.248787	0.747955	0.248787	0.747955	3	3	3	30.291	30.42	30.0021	29.8877	30.917	30.6548						3	3	3	12.6	12.6	12.6	31.789	0	118.09	8536800000	39	3	3	3	2	2	3	3	3	3	2
tr|B2B7L9|B2B7L9_PODAN 3-hydroxyisobutyryl-CoA hydrolase, mitochondrial OS=Podospora anserina (strain S / ATCC MYA-4624 / DSM 980 / FGSC 10383) OX=515849 GN=PODANS_2_11560 PE=3 SV=1	B2B7L9	B2B7L9					0.837617	0.495839	1.30216	0.30466	0.380907	0.748372	0.380907	0.748372	4	4	4	28.2296	26.8887	27.6274	27.4606	27.8437	28.584						4	4	4	9	9	9	55.466	0	12.097	1474300000	14	4	4	4	4	3	4	4	4	4	4
tr|B2B7Z1|B2B7Z1_PODAN Podospora anserina S mat+ genomic DNA chromosome 2, supercontig 2 OS=Podospora anserina (strain S / ATCC MYA-4624 / DSM 980 / FGSC 10383) OX=515849 GN=PODANS_2_12730 PE=4 SV=1	B2B7Z1	B2B7Z1					0.838211	0.495453	1.37944	0.304998	0.464085	0.749086	0.464085	0.749086	3	3	3	28.0464	29.4029	29.0288	28.4011	29.9951	29.4742						3	3	3	21.3	21.3	21.3	17.263	0	10.416	3705000000	34	2	3	2	2	2	2	2	3	2	2
tr|B2AU14|B2AU14_PODAN Podospora anserina S mat+ genomic DNA chromosome 1, supercontig 4 OS=Podospora anserina (strain S / ATCC MYA-4624 / DSM 980 / FGSC 10383) OX=515849 GN=PODANS_1_17650 PE=4 SV=1	B2AU14	B2AU14					0.834667	0.491893	1.09307	0.308129	0.12839	0.755694	0.12839	0.755694	1	1	1	26.0866	26.1896	26.4164	26.5896	26.3795	26.1087						1	1	1	10.5	10.5	10.5	14.746	0	33.304	498010000	10	1	1	1	1	1	1	1	1	1	1
tr|B2AEL6|B2AEL6_PODAN Eukaryotic translation initiation factor 3 subunit E OS=Podospora anserina (strain S / ATCC MYA-4624 / DSM 980 / FGSC 10383) OX=515849 GN=INT6 PE=3 SV=1	B2AEL6	B2AEL6					0.835687	0.491876	1.10165	0.308145	0.139668	0.755726	0.139668	0.755726	4	4	4	26.4568	26.614	26.929	27.0419	26.6334	26.7436						4	4	4	10.8	10.8	10.8	50.811	0	15.277	677210000	9	4	3	3	2	4	3	4	3	3	2
tr|B2VLG6|B2VLG6_PODAN CDP-diacylglycerol--serine O-phosphatidyltransferase OS=Podospora anserina (strain S / ATCC MYA-4624 / DSM 980 / FGSC 10383) OX=515849 GN=PODANS_5_6080 PE=3 SV=1	B2VLG6	B2VLG6					0.835447	0.491186	1.1787	0.308754	0.237197	0.75701	0.237197	0.75701	1	1	1	26.7138	27.0741	27.2791	26.7272	27.5354	27.516						1	1	1	7.8	7.8	7.8	27.285	0	117.26	911750000	13	1	1	1	1	1	1	1	1	1	1
tr|B2AU47|B2AU47_PODAN Podospora anserina S mat+ genomic DNA chromosome 1, supercontig 4 OS=Podospora anserina (strain S / ATCC MYA-4624 / DSM 980 / FGSC 10383) OX=515849 GN=PODANS_1_17942 PE=4 SV=1;tr|B2AFM4|B2AFM4_PODAN Podospora anserina S mat+ genomic	B2AU47;B2AFM4	B2AU47;B2AFM4					0.830765	0.488295	2.54636	0.311318	1.34844	0.762411	1.34844	0.762411	2;1	2;1	2;1	23.4026	25.0091	21.2154	22.1105	24.6552	26.9068						2	2	2	13.6	13.6	13.6	18.238	0	4.5478	204060000	6	2	2	1	1	2	2	2	2	1	1
tr|B2AVH5|B2AVH5_PODAN Podospora anserina S mat+ genomic DNA chromosome 7, supercontig 1 OS=Podospora anserina (strain S / ATCC MYA-4624 / DSM 980 / FGSC 10383) OX=515849 GN=PODANS_7_2930 PE=4 SV=1	B2AVH5	B2AVH5					0.829671	0.485712	1.07093	0.313621	0.0988661	0.767254	0.0988661	0.767254	5	5	5	28.4016	28.3331	28.5229	28.2919	28.5841	28.6782						5	5	5	31.3	31.3	31.3	27.27	0	25.179	2239100000	30	5	5	5	5	5	5	5	5	5	5
tr|B2AX96|B2AX96_PODAN Podospora anserina S mat+ genomic DNA chromosome 7, supercontig 1 OS=Podospora anserina (strain S / ATCC MYA-4624 / DSM 980 / FGSC 10383) OX=515849 GN=PODANS_7_9770 PE=4 SV=1	B2AX96	B2AX96					0.827326	0.484335	1.30392	0.314854	0.382853	0.769845	0.382853	0.769845	7	7	7	27.1506	27.7159	27.9578	27.1264	28.3245	28.522						7	7	7	62.4	62.4	62.4	10.574	0	27.293	1498300000	72	6	6	7	6	6	7	6	6	7	6
tr|B2AZF7|B2AZF7_PODAN Ribokinase OS=Podospora anserina (strain S / ATCC MYA-4624 / DSM 980 / FGSC 10383) OX=515849 GN=PODANS_3_3540 PE=3 SV=1	B2AZF7	B2AZF7					0.823389	0.482269	1.22934	0.316711	0.297887	0.773743	0.297887	0.773743	4	4	4	29.1741	28.2647	29.2025	29.1444	29.5943	28.7962						4	4	4	15.2	15.2	15.2	33.795	0	19.754	3425000000	16	3	3	4	4	3	3	3	3	4	4
tr|B2AS69|B2AS69_PODAN Podospora anserina S mat+ genomic DNA chromosome 1, supercontig 6 OS=Podospora anserina (strain S / ATCC MYA-4624 / DSM 980 / FGSC 10383) OX=515849 GN=PODANS_1_22530 PE=4 SV=1	B2AS69	B2AS69					0.823091	0.480935	1.19745	0.317914	0.259965	0.776266	0.259965	0.776266	5	5	5	29.073	28.5588	29.1918	28.6839	29.3095	29.6102						5	5	5	17	17	17	46.944	0	54.997	3494000000	34	4	5	5	5	5	5	4	5	5	5
tr|A0A090D685|A0A090D685_PODAN Uncharacterized protein OS=Podospora anserina (strain S / ATCC MYA-4624 / DSM 980 / FGSC 10383) OX=515849 PE=4 SV=1	A0A090D685	A0A090D685					0.824109	0.480849	1.75047	0.317991	0.807746	0.77643	0.807746	0.77643	2	2	2	26.0255	23.2055	25.7294	26.8358	25.095	25.4528						2	2	2	6.4	6.4	6.4	60.464	0	10.235	335150000	4	2	2	2	2	2	2	2	2	2	2
tr|B2AZ20|B2AZ20_PODAN Podospora anserina S mat+ genomic DNA chromosome 3, supercontig 2 OS=Podospora anserina (strain S / ATCC MYA-4624 / DSM 980 / FGSC 10383) OX=515849 GN=PODANS_3_3830 PE=4 SV=1	B2AZ20	B2AZ20					0.820114	0.477102	1.33322	0.321389	0.41492	0.783547	0.41492	0.783547	5	5	5	28.8142	27.2893	28.7068	28.2915	28.9092	28.8543						5	5	5	26.3	26.3	26.3	19.603	0	16.999	2400200000	36	5	4	5	3	5	5	5	4	5	3
tr|A0A090CUK0|A0A090CUK0_PODAN Uncharacterized protein OS=Podospora anserina (strain S / ATCC MYA-4624 / DSM 980 / FGSC 10383) OX=515849 PE=4 SV=1	A0A090CUK0	A0A090CUK0					0.820971	0.476952	1.12669	0.321526	0.172089	0.783834	0.172089	0.783834	2	2	2	25.6571	25.5757	26.1368	26.1929	25.9591	25.7339						2	2	2	10.1	10.1	10.1	23.15	0	10.091	374450000	17	2	2	2	1	2	1	2	2	2	1
tr|B2AYQ1|B2AYQ1_PODAN Podospora anserina S mat+ genomic DNA chromosome 1, supercontig 2 OS=Podospora anserina (strain S / ATCC MYA-4624 / DSM 980 / FGSC 10383) OX=515849 GN=PODANS_1_11850 PE=3 SV=1	B2AYQ1	B2AYQ1					0.821677	0.476757	1.21745	0.321703	0.283857	0.784204	0.283857	0.784204	12	12	12	28.8448	29.6094	29.5574	29.1644	30.0821	29.6166						12	12	12	26.1	26.1	26.1	67.26	0	202.88	4704400000	61	9	11	10	11	12	12	9	11	10	11
tr|A0A090CHQ2|A0A090CHQ2_PODAN Putative cytosolic 40S ribosomal protein Rps25 OS=Podospora anserina (strain S / ATCC MYA-4624 / DSM 980 / FGSC 10383) OX=515849 PE=4 SV=1	A0A090CHQ2	A0A090CHQ2					0.822891	0.476107	1.34591	0.322295	0.428586	0.785445	0.428586	0.785445	8	8	8	32.0418	32.7145	33.0994	33.9227	32.7874	32.4313						8	8	8	44.3	44.3	44.3	10.785	0	136.19	51134000000	112	7	7	7	8	7	7	7	7	7	8
tr|B2ABW4|B2ABW4_PODAN Podospora anserina S mat+ genomic DNA chromosome 2, supercontig 1 OS=Podospora anserina (strain S / ATCC MYA-4624 / DSM 980 / FGSC 10383) OX=515849 GN=PODANS_0_710 PE=4 SV=1	B2ABW4	B2ABW4					0.821566	0.473922	1.05094	0.324293	0.0716756	0.789622	0.0716756	0.789622	19	19	19	34.5714	34.672	34.8319	34.7454	34.8574	34.6875						19	19	19	52.2	52.2	52.2	47.389	0	323.31	172050000000	336	15	17	17	17	16	15	15	17	17	17
tr|A0A090CGU9|A0A090CGU9_PODAN Putative cytosolic 60S ribosomal protein Rpl27 OS=Podospora anserina (strain S / ATCC MYA-4624 / DSM 980 / FGSC 10383) OX=515849 PE=4 SV=1	A0A090CGU9	A0A090CGU9					0.820245	0.472063	1.28667	0.326	0.363647	0.793188	0.363647	0.793188	7	7	7	32.3198	32.8707	33.1302	33.8923	32.9377	32.5817						7	7	7	45.2	45.2	45.2	15.748	0	51.541	53235000000	142	7	7	7	7	7	7	7	7	7	7
tr|A0A090D4P0|A0A090D4P0_PODAN Putative mitochondrial trans-2-enoyl-CoA reductase OS=Podospora anserina (strain S / ATCC MYA-4624 / DSM 980 / FGSC 10383) OX=515849 PE=4 SV=1	A0A090D4P0	A0A090D4P0					0.82064	0.47179	1.15513	0.326251	0.20805	0.793712	0.20805	0.793712	4	4	4	25.5206	25.9242	26.3361	26.3603	25.9801	26.0647						4	4	4	13.5	13.5	13.5	46.034	0	6.3959	421890000	7	2	2	2	3	4	4	2	2	2	3
tr|A0A090CJI6|A0A090CJI6_PODAN Putative F-actin-capping protein subunit alpha OS=Podospora anserina (strain S / ATCC MYA-4624 / DSM 980 / FGSC 10383) OX=515849 PE=3 SV=1	A0A090CJI6	A0A090CJI6					0.82017	0.470322	1.10586	0.327605	0.145163	0.796537	0.145163	0.796537	7	7	7	29.1256	29.4092	29.7517	29.5836	29.6046	29.5337						7	7	7	33.9	33.9	33.9	30.144	0	212.61	4600700000	58	4	4	7	5	5	5	4	4	7	5
tr|B2B2B8|B2B2B8_PODAN Ferrochelatase OS=Podospora anserina (strain S / ATCC MYA-4624 / DSM 980 / FGSC 10383) OX=515849 GN=PODANS_6_6190 PE=3 SV=1	B2B2B8	B2B2B8					0.820266	0.46909	1.12254	0.328743	0.166761	0.798912	0.166761	0.798912	1	1	1	25.9003	25.8359	25.8379	25.7003	26.4115	25.9625						1	1	1	2.9	2.9	2.9	46.042	0	4.0718	391670000	1	1	1	1	1	1	1	1	1	1	1
tr|B2B6H5|B2B6H5_PODAN Carbonic anhydrase OS=Podospora anserina (strain S / ATCC MYA-4624 / DSM 980 / FGSC 10383) OX=515849 GN=PODANS_2_7790 PE=3 SV=1	B2B6H5	B2B6H5					0.819555	0.466181	3.68563	0.331445	1.88191	0.804542	1.88191	0.804542	1	1	1	25.5923	18.6325	25.6958	25.0947	25.1014	25.3702						1	1	1	7.1	7.1	7.1	18.438	0.0050107	2.0875	220540000	6	1	1	1	1	1	1	1	1	1	1
tr|A0A090D8Q5|A0A090D8Q5_PODAN Putative Mitochondrial of Cytochrome b-c1 complex subunit 2 OS=Podospora anserina (strain S / ATCC MYA-4624 / DSM 980 / FGSC 10383) OX=515849 PE=4 SV=1	A0A090D8Q5	A0A090D8Q5					0.818266	0.464479	1.12818	0.333034	0.174002	0.807848	0.174002	0.807848	13	13	13	32.2337	32.2701	32.6811	32.2515	32.6845	32.7709						13	13	13	44.6	44.6	44.6	46.102	0	294.2	36460000000	114	12	11	12	13	13	13	12	11	12	13
tr|B2VLC6|B2VLC6_PODAN Mitogen-activated protein kinase OS=Podospora anserina (strain S / ATCC MYA-4624 / DSM 980 / FGSC 10383) OX=515849 GN=PODANS_5_5680 PE=3 SV=1	B2VLC6	B2VLC6					0.81833	0.463618	1.05428	0.33384	0.0762539	0.809525	0.0762539	0.809525	8	8	8	29.3744	29.4747	29.6319	29.4796	29.5546	29.6756						8	8	8	26.1	26.1	26.1	40.958	0	40.38	4668500000	48	7	7	7	7	6	8	7	7	7	7
tr|B2AR28|B2AR28_PODAN Podospora anserina S mat+ genomic DNA chromosome 4, supercontig 4 OS=Podospora anserina (strain S / ATCC MYA-4624 / DSM 980 / FGSC 10383) OX=515849 GN=PODANS_4_8840 PE=4 SV=1	B2AR28	B2AR28					0.817108	0.462339	1.06505	0.33504	0.0909265	0.81202	0.0909265	0.81202	5	5	5	28.5078	28.5157	28.6379	28.4788	28.6196	28.8356						5	5	5	14.1	14.1	14.1	46.398	0	36.833	2448700000	18	5	5	4	4	5	5	5	5	4	4
tr|B2B6I7|B2B6I7_PODAN Podospora anserina S mat+ genomic DNA chromosome 2, supercontig 2 OS=Podospora anserina (strain S / ATCC MYA-4624 / DSM 980 / FGSC 10383) OX=515849 GN=PODANS_2_7910 PE=4 SV=1	B2B6I7	B2B6I7					0.816158	0.461058	1.06565	0.336244	0.0917333	0.814523	0.0917333	0.814523	11	11	11	33.3188	33.3444	33.2212	33.2106	33.3715	33.5775						11	11	11	65.7	65.7	65.7	22.905	0	214.13	66411000000	217	11	11	11	11	11	11	11	11	11	11
tr|B2AWE6|B2AWE6_PODAN Podospora anserina S mat+ genomic DNA chromosome 7, supercontig 1 OS=Podospora anserina (strain S / ATCC MYA-4624 / DSM 980 / FGSC 10383) OX=515849 GN=PODANS_7_6890 PE=3 SV=1	B2AWE6	B2AWE6					0.817197	0.461038	2.31789	0.336263	1.21281	0.814563	1.21281	0.814563	2	2	2	21.5471	22.6876	25.1052	22.7905	23.8364	26.3513						2	2	2	10.1	10.1	10.1	22.153	0	4.7475	153760000	5	2	1	2	2	2	2	2	1	2	2
tr|B2B2J0|B2B2J0_PODAN Podospora anserina S mat+ genomic DNA chromosome 6, supercontig 2 OS=Podospora anserina (strain S / ATCC MYA-4624 / DSM 980 / FGSC 10383) OX=515849 GN=PODANS_6_3020 PE=4 SV=1	B2B2J0	B2B2J0					0.81824	0.460963	1.07756	0.336334	0.107773	0.81471	0.107773	0.81471	6	6	6	28.7289	28.4316	28.5642	28.8506	28.503	28.6943						6	6	6	34	34	34	29.445	0	30.213	2502700000	30	4	4	6	5	5	5	4	4	6	5
tr|B2B0D1|B2B0D1_PODAN Podospora anserina S mat+ genomic DNA chromosome 3, supercontig 2 OS=Podospora anserina (strain S / ATCC MYA-4624 / DSM 980 / FGSC 10383) OX=515849 GN=PODANS_3_5280 PE=4 SV=1	B2B0D1	B2B0D1					0.817338	0.45982	1.10641	0.337412	0.145889	0.81695	0.145889	0.81695	9	9	9	29.481	28.9197	29.3696	29.3894	29.3243	29.4942						9	9	9	39.9	39.9	39.9	38.585	0	79.525	4082300000	40	8	5	9	8	7	8	8	5	9	8
tr|B2AYA6|B2AYA6_PODAN Podospora anserina S mat+ genomic DNA chromosome 1, supercontig 2 OS=Podospora anserina (strain S / ATCC MYA-4624 / DSM 980 / FGSC 10383) OX=515849 GN=PODANS_1_10440 PE=3 SV=1	B2AYA6	B2AYA6					0.811754	0.454215	1.04195	0.342738	0.0592855	0.827993	0.0592855	0.827993	20	20	17	33.3291	33.3292	33.5268	33.3984	33.4858	33.4788						20	20	17	54.3	54.3	52	44.709	0	323.31	69293000000	191	16	18	18	16	17	16	16	18	18	16
tr|B2B7Z3|B2B7Z3_PODAN Podospora anserina S mat+ genomic DNA chromosome 2, supercontig 2 OS=Podospora anserina (strain S / ATCC MYA-4624 / DSM 980 / FGSC 10383) OX=515849 GN=PODANS_2_12750 PE=4 SV=1	B2B7Z3	B2B7Z3					0.812519	0.45407	1.17862	0.342877	0.237096	0.828282	0.237096	0.828282	3	3	3	30.2705	30.1927	30.594	30.0729	30.8281	30.8675						3	3	3	40.2	40.2	40.2	12.024	0	40.487	9151500000	36	3	3	3	3	3	3	3	3	3	3
tr|B2A9L4|B2A9L4_PODAN Podospora anserina S mat+ genomic DNA chromosome 1, supercontig 1 OS=Podospora anserina (strain S / ATCC MYA-4624 / DSM 980 / FGSC 10383) OX=515849 GN=PODANS_1_40 PE=4 SV=1	B2A9L4	B2A9L4					0.813325	0.452815	1.21953	0.344079	0.286325	0.830769	0.286325	0.830769	5	5	5	28.5569	28.8345	28.8751	28.3823	29.3616	29.3816						5	5	5	21.2	21.2	21.2	35.069	0	19.587	3176800000	27	4	5	4	5	4	3	4	5	4	5
tr|B2B632|B2B632_PODAN Podospora anserina S mat+ genomic DNA chromosome 2, supercontig 2 OS=Podospora anserina (strain S / ATCC MYA-4624 / DSM 980 / FGSC 10383) OX=515849 GN=PODANS_2_6560 PE=4 SV=1	B2B632	B2B632					0.814782	0.451601	1.17716	0.345245	0.235314	0.833181	0.235314	0.833181	2	2	2	23.7185	23.1692	22.8557	23.5964	23.6239	23.2291						2	2	2	3.8	3.8	3.8	68.51	0	5.0281	66268000	3	1	1	1	2	1	2	1	1	1	2
tr|B2AQV2|B2AQV2_PODAN Podospora anserina S mat+ genomic DNA chromosome 4, supercontig 4 OS=Podospora anserina (strain S / ATCC MYA-4624 / DSM 980 / FGSC 10383) OX=515849 GN=PODANS_4_9600 PE=3 SV=1	B2AQV2	B2AQV2					0.815377	0.451535	1.28127	0.345309	0.357569	0.833314	0.357569	0.833314	3	3	3	24.7098	25.9356	25.799	25.559	26.1847	25.7733						3	3	3	11.3	11.3	11.3	32.844	0	5.2435	333060000	10	2	3	1	2	2	2	2	3	1	2
tr|B2AS71|B2AS71_PODAN Reticulon-like protein OS=Podospora anserina (strain S / ATCC MYA-4624 / DSM 980 / FGSC 10383) OX=515849 GN=PODANS_1_22550 PE=4 SV=1	B2AS71	B2AS71					0.815616	0.451306	1.71937	0.345529	0.781876	0.833769	0.781876	0.833769	3	3	3	27.2537	26.412	24.7727	26.0739	26.6484	28.0616						3	3	3	9.9	9.9	9.9	35.234	0	33.908	733950000	6	3	2	2	2	3	2	3	2	2	2
tr|B2AER6|B2AER6_PODAN Superoxide dismutase OS=Podospora anserina (strain S / ATCC MYA-4624 / DSM 980 / FGSC 10383) OX=515849 GN=PODANS_5_1740 PE=3 SV=1	B2AER6	B2AER6					0.816557	0.451208	1.50391	0.345623	0.588718	0.833963	0.588718	0.833963	2	2	2	27.3242	27.8014	26.9633	29.1318	27.8851	26.8383						2	2	2	11.7	11.7	11.7	25.494	0	124.54	1488900000	12	1	2	2	2	2	2	1	2	2	2
tr|B2AWK0|B2AWK0_PODAN Podospora anserina S mat+ genomic DNA chromosome 7, supercontig 1 OS=Podospora anserina (strain S / ATCC MYA-4624 / DSM 980 / FGSC 10383) OX=515849 GN=PODANS_7_7420 PE=3 SV=1	B2AWK0	B2AWK0					0.815109	0.450614	1.12165	0.346196	0.165621	0.835147	0.165621	0.835147	5	5	5	29.0372	29.2776	29.5279	29.3231	29.7236	29.2929						5	5	5	43.8	43.8	43.8	19.398	0	54.822	4404500000	38	4	4	4	4	4	5	4	4	4	4
tr|B2AP64|B2AP64_PODAN Podospora anserina S mat+ genomic DNA chromosome 7, supercontig 3 OS=Podospora anserina (strain S / ATCC MYA-4624 / DSM 980 / FGSC 10383) OX=515849 GN=PODANS_7_320 PE=4 SV=1	B2AP64	B2AP64					0.816789	0.450196	1.93435	0.346599	0.951852	0.835981	0.951852	0.835981	6	6	6	28.3854	26.6811	26.0962	26.2489	28.4857	29.2836						6	6	6	21.8	21.8	21.8	35.407	0	47.424	1639100000	15	6	1	3	4	5	6	6	1	3	4
tr|A0A090C8C6|A0A090C8C6_PODAN Cyclin-dependent kinases regulatory subunit OS=Podospora anserina (strain S / ATCC MYA-4624 / DSM 980 / FGSC 10383) OX=515849 PE=3 SV=1	A0A090C8C6	A0A090C8C6					0.81395	0.446955	1.27401	0.349736	0.34938	0.842462	0.34938	0.842462	8	8	8	27.2239	28.442	28.3574	28.6112	28.3004	28.1598						8	8	8	55.9	55.9	55.9	14.107	0	40.87	1905800000	44	7	8	7	8	7	8	7	8	7	8
tr|B2B1P5|B2B1P5_PODAN Actin-related protein 2/3 complex subunit 5 OS=Podospora anserina (strain S / ATCC MYA-4624 / DSM 980 / FGSC 10383) OX=515849 GN=PODANS_6_4010 PE=3 SV=1	B2B1P5	B2B1P5					0.814572	0.446773	1.06404	0.349913	0.08955	0.842827	0.08955	0.842827	7	7	7	28.6566	28.7832	28.9624	28.7741	28.9596	28.9371						7	7	7	49	49	49	22.905	0	170.22	2903200000	33	5	6	5	6	6	5	5	6	5	6
tr|B2B4I9|B2B4I9_PODAN Eukaryotic translation initiation factor 3 subunit F OS=Podospora anserina (strain S / ATCC MYA-4624 / DSM 980 / FGSC 10383) OX=515849 GN=PODANS_2_1440 PE=3 SV=1	B2B4I9	B2B4I9					0.815516	0.446632	1.19401	0.35005	0.255811	0.84311	0.255811	0.84311	8	8	8	27.765	28.0789	28.6021	28.0496	28.6357	28.5281						8	8	8	22.6	22.6	22.6	39.195	0	32.398	2001100000	37	7	7	7	7	7	7	7	7	7	7
tr|B2B122|B2B122_PODAN Podospora anserina S mat+ genomic DNA chromosome 3, supercontig 2 OS=Podospora anserina (strain S / ATCC MYA-4624 / DSM 980 / FGSC 10383) OX=515849 GN=PODANS_3_8090 PE=3 SV=1	B2B122	B2B122					0.817013	0.445847	1.09141	0.350814	0.126188	0.844687	0.126188	0.844687	12	12	12	31.6021	31.7561	32.1	31.9172	31.9969	31.9227						12	12	12	59.6	59.6	59.6	23.41	0	113.33	23916000000	138	12	12	12	12	12	11	12	12	12	12
tr|B2AT44|B2AT44_PODAN Podospora anserina S mat+ genomic DNA chromosome 1, supercontig 4 OS=Podospora anserina (strain S / ATCC MYA-4624 / DSM 980 / FGSC 10383) OX=515849 GN=PODANS_1_14625 PE=4 SV=1	B2AT44	B2AT44					0.814132	0.443568	1.23573	0.35304	0.305368	0.849277	0.305368	0.849277	5	5	5	27.4094	28.3197	28.525	28.5094	28.4873	28.1735						5	5	5	45.1	45.1	45.1	10.431	0	33.285	1960800000	41	5	5	5	5	5	4	5	5	5	5
tr|B2AE38|B2AE38_PODAN Podospora anserina S mat+ genomic DNA chromosome 4, supercontig 2 OS=Podospora anserina (strain S / ATCC MYA-4624 / DSM 980 / FGSC 10383) OX=515849 GN=PODANS_4_2740 PE=3 SV=1	B2AE38	B2AE38					0.814734	0.443379	1.94712	0.353225	0.961341	0.849658	0.961341	0.849658	3	3	3	24.9481	22.9121	22.3496	22.7446	25.1183	25.2309						3	3	3	3.6	3.6	3.6	114.32	0	10.8	128430000	4	2	1	1	1	2	1	2	1	1	1
tr|B2AN84|B2AN84_PODAN Podospora anserina S mat+ genomic DNA chromosome 6, supercontig 4 OS=Podospora anserina (strain S / ATCC MYA-4624 / DSM 980 / FGSC 10383) OX=515849 GN=PODANS_6_9470 PE=3 SV=1	B2AN84	B2AN84					0.813729	0.442646	1.49305	0.353943	0.578264	0.851138	0.578264	0.851138	3	3	3	25.1318	25.2386	25.4378	27.1847	25.0382	25.3201						3	3	3	14.3	14.3	14.3	30.757	0	17.762	350700000	4	2	2	2	3	1	1	2	2	2	3
tr|B2A9W1|B2A9W1_PODAN Podospora anserina S mat+ genomic DNA chromosome 1, supercontig 1 OS=Podospora anserina (strain S / ATCC MYA-4624 / DSM 980 / FGSC 10383) OX=515849 GN=PODANS_1_1980 PE=3 SV=1	B2A9W1	B2A9W1					0.808832	0.438056	1.14409	0.35847	0.194195	0.860456	0.194195	0.860456	10	10	10	30.1965	30.2299	29.8744	30.6503	30.2554	29.9776						10	10	10	26.5	26.5	26.5	57.133	0	143.46	7522900000	46	10	10	9	10	10	10	10	10	9	10
tr|B2AWT5|B2AWT5_PODAN ERF1 cytosolic peptide chain release factor encoded by the su2/AS2 protein OS=Podospora anserina (strain S / ATCC MYA-4624 / DSM 980 / FGSC 10383) OX=515849 GN=PODANS_7_8260 PE=4 SV=1	B2AWT5	B2AWT5					0.809011	0.43728	1.63555	0.359241	0.709778	0.862039	0.709778	0.862039	4	4	4	26.024	24.9666	27.1631	25.7172	27.383	27.1828						4	4	4	9.4	9.4	9.4	48.916	0	9.4352	633850000	8	3	3	4	4	4	3	3	3	4	4
tr|A0A090CU85|A0A090CU85_PODAN Putative MFS transporter OS=Podospora anserina (strain S / ATCC MYA-4624 / DSM 980 / FGSC 10383) OX=515849 PE=4 SV=1	A0A090CU85	A0A090CU85					0.800456	0.431578	1.19279	0.36494	0.25434	0.873741	0.25434	0.873741	1	1	1	25.5469	26.4218	25.9825	26.0873	26.5275	26.0994						1	1	1	2.4	2.4	2.4	55.809	0	20.797	445150000	7	1	1	1	1	1	1	1	1	1	1
tr|B2ABC6|B2ABC6_PODAN Podospora anserina S mat+ genomic DNA chromosome 1, supercontig 1 OS=Podospora anserina (strain S / ATCC MYA-4624 / DSM 980 / FGSC 10383) OX=515849 GN=PODANS_1_6870 PE=4 SV=1	B2ABC6	B2ABC6					0.799358	0.428744	1.19754	0.367802	0.260073	0.879605	0.260073	0.879605	3	3	3	26.4509	26.2093	26.8327	26.9598	26.2922	27.0212						3	3	3	11.6	11.6	11.6	31.334	0	7.5516	637750000	14	2	2	2	2	3	2	2	2	2	2
tr|A0A090CWM0|A0A090CWM0_PODAN Eukaryotic translation initiation factor 3 subunit L OS=Podospora anserina (strain S / ATCC MYA-4624 / DSM 980 / FGSC 10383) OX=515849 PE=3 SV=1	A0A090CWM0	A0A090CWM0					0.798816	0.428177	1.2832	0.368377	0.359749	0.880783	0.359749	0.880783	4	4	4	27.4547	26.1152	27.0247	27.2187	27.0467	27.4084						4	4	4	11.6	11.6	11.6	54.769	0	32.67	866120000	8	3	2	3	3	3	2	3	2	3	3
tr|B2AKT6|B2AKT6_PODAN Podospora anserina S mat+ genomic DNA chromosome 5, supercontig 9 OS=Podospora anserina (strain S / ATCC MYA-4624 / DSM 980 / FGSC 10383) OX=515849 GN=PODANS_5_8410 PE=4 SV=1	B2AKT6	B2AKT6					0.798804	0.427279	1.84041	0.369289	0.880027	0.88265	0.880027	0.88265	2	2	2	26.0144	26.2794	23.3158	25.9482	26.6791	25.6224						2	2	2	14.6	14.6	14.6	22.93	0	10.305	383520000	6	1	1	1	2	2	2	1	1	1	2
tr|A0A090C8N7|A0A090C8N7_PODAN Uncharacterized protein OS=Podospora anserina (strain S / ATCC MYA-4624 / DSM 980 / FGSC 10383) OX=515849 PE=4 SV=1	A0A090C8N7	A0A090C8N7					0.799886	0.427267	11.6515	0.3693	3.54245	0.882674	3.54245	0.882674	1	1	1	15.6994	27.6552	27.5958	26.1167	27.9315	27.5295						1	1	1	4.4	4.4	4.4	27.614	0	8.4994	936710000	8	0	1	1	1	1	1	0	1	1	1
tr|A0A090C952|A0A090C952_PODAN Putative NADH-ubiquinone oxidoreductase 49 kDa subunit OS=Podospora anserina (strain S / ATCC MYA-4624 / DSM 980 / FGSC 10383) OX=515849 PE=3 SV=1	A0A090C952	A0A090C952					0.801886	0.427122	1.14087	0.369449	0.190137	0.882977	0.190137	0.882977	7	7	7	28.8063	28.4386	28.7039	29.0917	28.4782	28.9494						7	7	7	16	16	16	53.974	0	20.006	2734900000	28	6	4	6	7	6	6	6	4	6	7
tr|A0A090D3Q8|A0A090D3Q8_PODAN Thioredoxin reductase OS=Podospora anserina (strain S / ATCC MYA-4624 / DSM 980 / FGSC 10383) OX=515849 PE=3 SV=1	A0A090D3Q8	A0A090D3Q8					0.798076	0.424686	1.08831	0.371932	0.12209	0.888057	0.12209	0.888057	6	6	6	29.0377	28.9534	29.3045	29.1051	29.3929	29.1639						6	6	6	21.7	21.7	21.7	35.497	0	42.116	3617800000	31	5	6	6	6	4	6	5	6	6	6
tr|B2AAG3|B2AAG3_PODAN Podospora anserina S mat+ genomic DNA chromosome 1, supercontig 1 OS=Podospora anserina (strain S / ATCC MYA-4624 / DSM 980 / FGSC 10383) OX=515849 GN=PODANS_1_3910 PE=4 SV=1	B2AAG3	B2AAG3					0.798383	0.423924	7.62375	0.372712	2.9305	0.889651	2.9305	0.889651	2	2	2	15.6994	24.9324	26.1145	25.0121	25.3638	25.1618						2	2	2	8.2	8.2	8.2	31.001	0	3.7327	219220000	6	0	2	2	2	2	1	0	2	2	2
tr|A0A090CLJ0|A0A090CLJ0_PODAN 40S ribosomal protein S30 OS=Podospora anserina (strain S / ATCC MYA-4624 / DSM 980 / FGSC 10383) OX=515849 PE=3 SV=1	A0A090CLJ0	A0A090CLJ0					0.792815	0.420771	1.33614	0.375954	0.418067	0.896274	0.418067	0.896274	3	2	2	27.3101	27.8406	28.0133	28.9534	27.8788	27.586						3	2	2	33.3	19	19	6.9851	0	7.9706	1645800000	27	3	3	3	3	3	3	2	2	2	2
tr|B2ABC5|B2ABC5_PODAN Podospora anserina S mat+ genomic DNA chromosome 1, supercontig 1 OS=Podospora anserina (strain S / ATCC MYA-4624 / DSM 980 / FGSC 10383) OX=515849 GN=PODANS_1_6860 PE=4 SV=1	B2ABC5	B2ABC5					0.779929	0.414585	1.27314	0.382387	0.348394	0.909388	0.348394	0.909388	8	8	8	27.8664	27.8204	28.3809	27.8118	28.3205	28.9807						8	8	8	24.5	24.5	24.5	41.993	0	30.313	1931800000	32	6	6	7	4	7	7	6	6	7	4
tr|B2B128|B2B128_PODAN Ribosomal protein L15 OS=Podospora anserina (strain S / ATCC MYA-4624 / DSM 980 / FGSC 10383) OX=515849 GN=PODANS_3_9090 PE=3 SV=1	B2B128	B2B128					0.777549	0.41366	1.28706	0.383357	0.364077	0.911362	0.364077	0.911362	6	6	6	32.249	32.0451	32.2611	33.3331	32.1015	32.2128						6	6	6	33	33	33	24.089	0	152.82	35089000000	79	6	5	5	6	5	5	6	5	5	6
tr|B2AXD3|B2AXD3_PODAN Podospora anserina S mat+ genomic DNA chromosome 7, supercontig 1 OS=Podospora anserina (strain S / ATCC MYA-4624 / DSM 980 / FGSC 10383) OX=515849 GN=PODANS_7_10170 PE=3 SV=1	B2AXD3	B2AXD3					0.77605	0.412081	1.42498	0.385018	0.510942	0.914742	0.510942	0.914742	5	5	5	30.6201	31.1608	31.7134	32.5818	31.3688	31.0765						5	5	5	36.2	36.2	36.2	14.837	0	146.28	19079000000	99	5	5	5	5	5	5	5	5	5	5
tr|B2B4Z1|B2B4Z1_PODAN V-type proton ATPase proteolipid subunit OS=Podospora anserina (strain S / ATCC MYA-4624 / DSM 980 / FGSC 10383) OX=515849 GN=PODANS_2_2980 PE=3 SV=1	B2B4Z1	B2B4Z1					0.771923	0.409163	1.33885	0.388103	0.42099	0.921015	0.42099	0.921015	1	1	1	26.4508	25.9773	25.2106	25.7475	26.5011	26.6529						1	1	1	11.1	11.1	11.1	16.382	0	7.0006	453440000	9	1	1	1	1	1	1	1	1	1	1
tr|B2B2P6|B2B2P6_PODAN Podospora anserina S mat+ genomic DNA chromosome 6, supercontig 2 OS=Podospora anserina (strain S / ATCC MYA-4624 / DSM 980 / FGSC 10383) OX=515849 GN=PODANS_6_2490 PE=4 SV=1	B2B2P6	B2B2P6					0.772665	0.409018	1.15415	0.388257	0.206826	0.921328	0.206826	0.921328	1	1	1	24.8095	24.9001	25.0408	24.8236	25.5384	25.0089						1	1	1	11.6	11.6	11.6	10.474	0	4.7359	207420000	10	1	1	1	1	1	1	1	1	1	1
tr|B2B148|B2B148_PODAN Podospora anserina S mat+ genomic DNA chromosome 3, supercontig 2 OS=Podospora anserina (strain S / ATCC MYA-4624 / DSM 980 / FGSC 10383) OX=515849 GN=PODANS_3_9290 PE=4 SV=1	B2B148	B2B148					0.770252	0.407794	1.15337	0.389559	0.205854	0.923973	0.205854	0.923973	13	13	13	28.9362	29.038	29.5378	29.4919	29.5065	29.1311						13	13	13	28.9	28.9	28.9	72.523	0	107.72	3949900000	50	10	11	11	11	12	11	10	11	11	11
tr|A0A090CA07|A0A090CA07_PODAN Uncharacterized protein OS=Podospora anserina (strain S / ATCC MYA-4624 / DSM 980 / FGSC 10383) OX=515849 PE=4 SV=1	A0A090CA07	A0A090CA07					0.770429	0.406311	8.06643	0.391142	3.01193	0.927185	3.01193	0.927185	2	2	2	15.6994	24.8415	25.9155	25.5967	24.9263	24.9692						2	2	2	4.3	4.3	4.3	54.311	0.0014728	2.4842	208830000	2	0	1	2	2	2	1	0	1	2	2
tr|B2B4H0|B2B4H0_PODAN U1 small nuclear ribonucleoprotein C OS=Podospora anserina (strain S / ATCC MYA-4624 / DSM 980 / FGSC 10383) OX=515849 GN=PODANS_2_1245 PE=3 SV=1	B2B4H0	B2B4H0					0.770756	0.406151	1.45988	0.391312	0.545845	0.927531	0.545845	0.927531	1	1	1	22.8793	24.0599	24.788	24.6828	24.6097	24.0723						1	1	1	6	6	6	21.849	0	2.9197	124340000	4	1	1	1	1	1	1	1	1	1	1
tr|A0A090D6Y1|A0A090D6Y1_PODAN Putative riboflavin kinase OS=Podospora anserina (strain S / ATCC MYA-4624 / DSM 980 / FGSC 10383) OX=515849 PE=4 SV=1	A0A090D6Y1	A0A090D6Y1					0.770737	0.405831	6.71816	0.391654	2.74807	0.928225	2.74807	0.928225	1	1	1	15.6994	24.5626	24.5935	24.4685	24.2161	24.4151						1	1	1	6.9	6.9	6.9	22.456	0	2.709	115170000	4	0	1	1	1	1	1	0	1	1	1
tr|B2AWH6|B2AWH6_PODAN Podospora anserina S mat+ genomic DNA chromosome 7, supercontig 1 OS=Podospora anserina (strain S / ATCC MYA-4624 / DSM 980 / FGSC 10383) OX=515849 GN=PODANS_7_7200 PE=3 SV=1	B2AWH6	B2AWH6					0.771815	0.405817	1.16942	0.39167	0.225791	0.928257	0.225791	0.928257	11	11	11	28.0067	28.6036	28.6823	28.8906	28.5403	28.5391						11	11	11	25	25	25	59.403	0	119.33	2386400000	28	7	11	8	9	8	7	7	11	8	9
tr|B2B6X0|B2B6X0_PODAN Methylenetetrahydrofolate reductase OS=Podospora anserina (strain S / ATCC MYA-4624 / DSM 980 / FGSC 10383) OX=515849 GN=PODANS_2_9160 PE=3 SV=1	B2B6X0	B2B6X0					0.771384	0.405463	1.2419	0.392048	0.312554	0.929024	0.312554	0.929024	1	1	1	23.9807	24.5147	24.4632	24.2993	25.2104	24.3865						1	1	1	1.4	1.4	1.4	77.248	0	3.2876	145050000	9	1	1	1	1	1	1	1	1	1	1
tr|B2AEJ6|B2AEJ6_PODAN Podospora anserina S mat+ genomic DNA chromosome 5, supercontig 1 OS=Podospora anserina (strain S / ATCC MYA-4624 / DSM 980 / FGSC 10383) OX=515849 GN=PODANS_5_2360 PE=4 SV=1	B2AEJ6	B2AEJ6					0.767074	0.403638	1.3879	0.394008	0.472903	0.932998	0.472903	0.932998	4	4	4	26.1008	27.123	27.3624	26.966	27.0507	27.9882						4	4	4	46.2	46.2	46.2	11.684	0	16.655	927010000	22	3	3	4	4	4	4	3	3	4	4
tr|B2AM35|B2AM35_PODAN Protein phosphatase PP2A regulatory subunit B OS=Podospora anserina (strain S / ATCC MYA-4624 / DSM 980 / FGSC 10383) OX=515849 GN=PODANS_1_14120 PE=3 SV=1	B2AM35	B2AM35					0.765639	0.401723	1.12891	0.396074	0.174925	0.937185	0.174925	0.937185	5	5	5	28.7886	28.2349	28.7263	28.6947	28.8875	28.6924						5	5	5	14.6	14.6	14.6	54.217	0	28.541	2588600000	23	3	3	4	3	3	4	3	3	4	3
tr|B2B6Z9|B2B6Z9_PODAN Podospora anserina S mat+ genomic DNA chromosome 2, supercontig 2 OS=Podospora anserina (strain S / ATCC MYA-4624 / DSM 980 / FGSC 10383) OX=515849 GN=PODANS_2_9410 PE=4 SV=1	B2B6Z9	B2B6Z9					0.766723	0.400995	1.09168	0.396861	0.126556	0.938779	0.126556	0.938779	11	11	11	32.1871	32.5625	32.4073	32.6532	32.5052	32.3781						11	11	11	53.2	53.2	53.2	27.214	0	137.96	35361000000	124	8	9	9	10	11	11	8	9	9	10
sp|B2AWV6|AMPP1_PODAN Probable Xaa-Pro aminopeptidase P OS=Podospora anserina (strain S / ATCC MYA-4624 / DSM 980 / FGSC 10383) OX=515849 GN=AMPP PE=3 SV=1	B2AWV6	B2AWV6					0.760062	0.396689	1.68822	0.40155	0.755506	0.948268	0.755506	0.948268	3	3	3	23.7891	25.7888	26.3963	25.8621	26.2767	26.1018						3	3	3	7.4	7.4	7.4	75.095	0	16.258	375090000	7	3	2	1	2	2	2	3	2	1	2
tr|B2AZB5|B2AZB5_PODAN Podospora anserina S mat+ genomic DNA chromosome 3, supercontig 2 OS=Podospora anserina (strain S / ATCC MYA-4624 / DSM 980 / FGSC 10383) OX=515849 GN=PODANS_3_3160 PE=4 SV=1	B2AZB5	B2AZB5					0.758669	0.394843	9.26459	0.403576	3.21173	0.952363	3.21173	0.952363	3	3	3	25.813	15.6994	25.8004	25.5475	25.9419	25.4586						3	3	3	7.4	7.4	7.4	58.47	0	23.671	296090000	5	2	1	2	2	2	3	2	1	2	2
tr|B2AMQ7|B2AMQ7_PODAN Podospora anserina S mat+ genomic DNA chromosome 5, supercontig 5 OS=Podospora anserina (strain S / ATCC MYA-4624 / DSM 980 / FGSC 10383) OX=515849 GN=PODANS_5_4870 PE=4 SV=1	B2AMQ7	B2AMQ7					0.753724	0.3913	1.17915	0.40749	0.237746	0.960268	0.237746	0.960268	13	13	13	29.3767	29.9442	29.8086	30.3	29.7174	29.8253						13	13	13	33.7	33.7	33.7	65.707	0	140.25	5826300000	79	8	11	10	11	11	10	8	11	10	11
tr|B2AA16|B2AA16_PODAN Podospora anserina S mat+ genomic DNA chromosome 1, supercontig 1 OS=Podospora anserina (strain S / ATCC MYA-4624 / DSM 980 / FGSC 10383) OX=515849 GN=PODANS_1_2500 PE=4 SV=1	B2AA16	B2AA16					0.749533	0.388825	1.96257	0.410246	0.972747	0.965825	0.972747	0.965825	1	1	1	24.1257	27.0856	27.0454	26.6067	27.1898	27.3784						1	1	1	5.6	5.6	5.6	25.092	0	2.8728	728980000	7	1	1	1	1	1	1	1	1	1	1
tr|B2AMU5|B2AMU5_PODAN Podospora anserina S mat+ genomic DNA chromosome 5, supercontig 5 OS=Podospora anserina (strain S / ATCC MYA-4624 / DSM 980 / FGSC 10383) OX=515849 GN=PODANS_5_5190 PE=4 SV=1	B2AMU5	B2AMU5					0.746869	0.387724	1.07876	0.411478	0.109376	0.968308	0.109376	0.968308	6	6	6	28.5227	28.4719	28.5519	28.5531	28.8418	28.4797						6	6	6	19.1	19.1	19.1	38.443	0	44.589	2400800000	38	5	6	6	5	6	6	5	6	6	5
tr|A0A090CIL9|A0A090CIL9_PODAN Uncharacterized protein OS=Podospora anserina (strain S / ATCC MYA-4624 / DSM 980 / FGSC 10383) OX=515849 PE=4 SV=1	A0A090CIL9	A0A090CIL9					0.747121	0.387309	8.89635	0.411943	3.15321	0.969245	3.15321	0.969245	2	2	2	25.6823	25.1955	15.6994	25.6092	25.3579	25.0697						2	2	2	9.3	9.3	9.3	32.961	0	4.5112	260630000	2	2	1	1	2	2	1	2	1	1	2
tr|B2AQR3|B2AQR3_PODAN Podospora anserina S mat+ genomic DNA chromosome 4, supercontig 4 OS=Podospora anserina (strain S / ATCC MYA-4624 / DSM 980 / FGSC 10383) OX=515849 GN=PODANS_4_3440 PE=4 SV=1	B2AQR3	B2AQR3					0.748483	0.386322	1.15147	0.413051	0.20348	0.971477	0.20348	0.971477	10	10	10	30.5851	30.2839	30.2847	30.9466	30.4797	30.3379						10	10	10	35.1	35.1	35.1	51.499	0	77.116	9347900000	44	9	10	8	10	9	8	9	10	8	10
sp|B2AAJ5|3HAO_PODAN 3-hydroxyanthranilate 3,4-dioxygenase OS=Podospora anserina (strain S / ATCC MYA-4624 / DSM 980 / FGSC 10383) OX=515849 GN=BNA1 PE=3 SV=1	B2AAJ5	B2AAJ5					0.74488	0.384315	1.09115	0.415313	0.125854	0.976032	0.125854	0.976032	7	7	7	31.4512	31.3551	31.2625	31.6564	31.5298	31.2601						7	7	7	50.3	50.3	50.3	21.186	0	180.01	17373000000	78	6	5	4	6	5	5	6	5	4	6
tr|B2AB55|B2AB55_PODAN Podospora anserina S mat+ genomic DNA chromosome 1, supercontig 1 OS=Podospora anserina (strain S / ATCC MYA-4624 / DSM 980 / FGSC 10383) OX=515849 GN=PODANS_1_6180 PE=4 SV=1	B2AB55	B2AB55					0.73843	0.380511	1.54822	0.419633	0.630612	0.984721	0.630612	0.984721	1	1	1	22.7797	23.761	23.8883	23.0472	24.7782	24.4955						1	1	1	2.7	2.7	2.7	49.366	0	14.338	98036000	7	1	1	1	1	1	1	1	1	1	1
tr|B2AVR6|B2AVR6_PODAN Podospora anserina S mat+ genomic DNA chromosome 7, supercontig 1 OS=Podospora anserina (strain S / ATCC MYA-4624 / DSM 980 / FGSC 10383) OX=515849 GN=PODANS_7_2040 PE=4 SV=1	B2AVR6	B2AVR6					0.738962	0.380305	10.2496	0.419868	3.3575	0.985193	3.3575	0.985193	2	2	2	15.6994	25.4743	26.0751	24.6901	26.1305	26.5008						2	2	2	10	10	10	28.548	0	4.8624	312790000	5	0	1	2	1	2	2	0	1	2	1
tr|B2B206|B2B206_PODAN Podospora anserina S mat+ genomic DNA chromosome 6, supercontig 2 OS=Podospora anserina (strain S / ATCC MYA-4624 / DSM 980 / FGSC 10383) OX=515849 GN=PODANS_6_5090 PE=4 SV=1	B2B206	B2B206					0.739366	0.379803	1.51907	0.420442	0.603185	0.986346	0.603185	0.986346	4	4	4	26.8446	27.3382	27.8131	27.0473	28.9233	27.8349						4	4	4	12.1	12.1	12.1	37.461	0	8.3743	1413200000	13	3	3	2	3	3	2	3	3	2	3
tr|B2B3E0|B2B3E0_PODAN Podospora anserina S mat+ genomic DNA chromosome 6, supercontig 2 OS=Podospora anserina (strain S / ATCC MYA-4624 / DSM 980 / FGSC 10383) OX=515849 GN=PODANS_6_310 PE=4 SV=1	B2B3E0	B2B3E0					0.732331	0.375285	1.09111	0.425638	0.125795	0.99678	0.125795	0.99678	10	10	9	29.7435	29.8457	29.8925	30.1657	29.7569	29.9365						10	10	9	69.1	69.1	69.1	15.568	0	85.424	5999400000	101	10	10	10	9	10	10	10	10	10	9
tr|B2ABM8|B2ABM8_PODAN Podospora anserina S mat+ genomic DNA chromosome 1, supercontig 5 OS=Podospora anserina (strain S / ATCC MYA-4624 / DSM 980 / FGSC 10383) OX=515849 GN=PODANS_1_20390 PE=4 SV=1	B2ABM8	B2ABM8					0.727686	0.373133	1.17193	0.428137	0.228882	1.00179	0.228882	1.00179	5	5	5	29.1888	29.2783	29.3208	29.9313	29.1879	29.3554						5	5	5	50.9	50.9	50.9	13.228	0	22.212	4255900000	38	5	3	5	5	3	2	5	3	5	5
tr|B2ADZ5|B2ADZ5_PODAN Podospora anserina S mat+ genomic DNA chromosome 4, supercontig 2 OS=Podospora anserina (strain S / ATCC MYA-4624 / DSM 980 / FGSC 10383) OX=515849 GN=PODANS_4_2330 PE=4 SV=1	B2ADZ5	B2ADZ5					0.728386	0.372524	7.12847	0.428845	2.83359	1.00321	2.83359	1.00321	1	1	1	15.6994	24.3506	23.9453	23.9809	24.5304	23.9848						1	1	1	3	3	3	39.753	0	2.927	113030000	4	1	1	1	1	1	1	1	1	1	1
tr|A0A090CBZ2|A0A090CBZ2_PODAN GTP:AMP phosphotransferase, mitochondrial OS=Podospora anserina (strain S / ATCC MYA-4624 / DSM 980 / FGSC 10383) OX=515849 GN=ADK2 PE=3 SV=1	A0A090CBZ2	A0A090CBZ2					0.724952	0.370457	1.80383	0.431263	0.851063	1.00805	0.851063	1.00805	1	1	1	22.188	21.9827	22.1487	21.3156	23.4554	24.1017						1	1	1	4.1	4.1	4.1	29.918	0.0096618	1.6794	45686000	2	1	1	1	1	1	1	1	1	1	1
tr|B2AQP5|B2AQP5_PODAN Phospho-2-dehydro-3-deoxyheptonate aldolase OS=Podospora anserina (strain S / ATCC MYA-4624 / DSM 980 / FGSC 10383) OX=515849 GN=PODANS_4_3540 PE=3 SV=1	B2AQP5	B2AQP5					0.723934	0.369651	1.11459	0.432209	0.156514	1.00995	0.156514	1.00995	6	6	6	29.5813	29.4517	29.3162	29.7318	29.337	29.75						6	6	6	22.5	22.5	22.5	40.401	0	41.988	4678500000	38	5	5	4	5	5	6	5	5	4	5
tr|B2B7K2|B2B7K2_PODAN Podospora anserina S mat+ genomic DNA chromosome 2, supercontig 2 OS=Podospora anserina (strain S / ATCC MYA-4624 / DSM 980 / FGSC 10383) OX=515849 GN=PODANS_2_11390 PE=4 SV=1	B2B7K2	B2B7K2					0.724084	0.368993	7.7966	0.432982	2.96285	1.0115	2.96285	1.0115	1	1	1	15.6994	24.3474	24.6005	24.3409	24.7916	24.4033						1	1	1	3.8	3.8	3.8	49.912	0	7.5909	119260000	1	0	1	1	1	1	1	0	1	1	1
tr|B2B4H1|B2B4H1_PODAN Podospora anserina S mat+ genomic DNA chromosome 2, supercontig 2 OS=Podospora anserina (strain S / ATCC MYA-4624 / DSM 980 / FGSC 10383) OX=515849 GN=PODANS_2_1250 PE=3 SV=1	B2B4H1	B2B4H1					0.724036	0.368674	1.27868	0.433357	0.354652	1.01225	0.354652	1.01225	1	1	1	26.6188	26.8542	26.7861	26.449	27.269	27.605						1	1	1	3.2	3.2	3.2	31.783	0	2.8173	886200000	7	1	1	1	1	1	1	1	1	1	1
tr|B2AZG2|B2AZG2_PODAN Podospora anserina S mat+ genomic DNA chromosome 3, supercontig 2 OS=Podospora anserina (strain S / ATCC MYA-4624 / DSM 980 / FGSC 10383) OX=515849 GN=PODANS_3_3590 PE=4 SV=1	B2AZG2	B2AZG2					0.723701	0.368227	1.35946	0.433884	0.443034	1.0133	0.443034	1.0133	3	3	3	30.3911	30.3693	31.0519	30.3025	31.3352	31.5037						3	3	3	44.8	44.8	44.8	11.801	0	47.727	12103000000	45	3	3	3	3	3	3	3	3	3	3
tr|B2B1X2|B2B1X2_PODAN Podospora anserina S mat+ genomic DNA chromosome 6, supercontig 2 OS=Podospora anserina (strain S / ATCC MYA-4624 / DSM 980 / FGSC 10383) OX=515849 GN=PODANS_6_4750 PE=3 SV=1	B2B1X2	B2B1X2					0.719928	0.366801	1.24122	0.43557	0.311761	1.01668	0.311761	1.01668	6	6	6	27.4663	28.0818	28.3828	28.1385	28.1472	28.5805						6	6	6	27	27	27	33.522	0	24.541	1813700000	29	5	4	4	6	4	5	5	4	4	6
tr|B2ARJ3|B2ARJ3_PODAN Podospora anserina S mat+ genomic DNA chromosome 4, supercontig 4 OS=Podospora anserina (strain S / ATCC MYA-4624 / DSM 980 / FGSC 10383) OX=515849 GN=PODANS_4_7300 PE=3 SV=1	B2ARJ3	B2ARJ3					0.719042	0.364882	1.11862	0.437848	0.161723	1.02123	0.161723	1.02123	10	10	10	28.7526	28.8434	29.1221	28.8751	29.0624	29.2657						10	10	10	36.5	36.5	36.5	33.367	0	34.969	3216600000	34	7	7	8	10	9	8	7	7	8	10
tr|B2A914|B2A914_PODAN Podospora anserina S mat+ genomic DNA chromosome 1, supercontig 1 OS=Podospora anserina (strain S / ATCC MYA-4624 / DSM 980 / FGSC 10383) OX=515849 GN=PODANS_1_8100 PE=3 SV=1	B2A914	B2A914					0.718703	0.364432	1.25181	0.438383	0.324018	1.0223	0.324018	1.0223	8	8	8	32.6881	32.6831	32.8599	33.5849	33.1102	32.5081						8	8	8	50.7	50.7	50.7	15.946	0	112.2	49895000000	94	7	8	7	8	7	7	7	8	7	8
tr|B2B1C5|B2B1C5_PODAN Podospora anserina S mat+ genomic DNA chromosome 3, supercontig 2 OS=Podospora anserina (strain S / ATCC MYA-4624 / DSM 980 / FGSC 10383) OX=515849 GN=PODANS_3_9000 PE=4 SV=1	B2B1C5	B2B1C5					0.717682	0.36346	1.16789	0.439543	0.223906	1.02462	0.223906	1.02462	3	3	3	29.4087	29.3002	29.8376	29.9747	29.4769	29.7666						3	3	3	2.3	2.3	2.3	134.72	0	8.2219	5060000000	24	3	3	3	3	3	3	3	3	3	3
tr|B2AZN4|B2AZN4_PODAN Podospora anserina S mat+ genomic DNA chromosome 3, supercontig 2 OS=Podospora anserina (strain S / ATCC MYA-4624 / DSM 980 / FGSC 10383) OX=515849 GN=PODANS_3_5010 PE=4 SV=1	B2AZN4	B2AZN4					0.716303	0.362822	1.7598	0.440307	0.815412	1.02615	0.815412	1.02615	3	3	3	24.3882	25.6745	25.0035	27.1587	25.5909	24.7629						3	3	3	22.9	22.9	22.9	12.245	0	8.4779	337980000	4	1	2	2	3	2	1	1	2	2	3
tr|B2AYX6|B2AYX6_PODAN Phospho-2-dehydro-3-deoxyheptonate aldolase OS=Podospora anserina (strain S / ATCC MYA-4624 / DSM 980 / FGSC 10383) OX=515849 GN=PODANS_1_12560 PE=3 SV=1	B2AYX6	B2AYX6					0.711366	0.359048	1.13136	0.444847	0.178061	1.03521	0.178061	1.03521	5	5	5	27.7066	27.9876	28.1616	27.928	28.3048	28.1572						5	5	5	18.7	18.7	18.7	40.731	0	90.079	1671700000	24	2	3	3	4	4	5	2	3	3	4
tr|B2B4V0|B2B4V0_PODAN Podospora anserina S mat+ genomic DNA chromosome 2, supercontig 2 OS=Podospora anserina (strain S / ATCC MYA-4624 / DSM 980 / FGSC 10383) OX=515849 GN=PODANS_2_2550 PE=4 SV=1	B2B4V0	B2B4V0					0.711939	0.358591	1.5059	0.445401	0.59063	1.03632	0.59063	1.03632	8	8	8	29.3446	30.4941	30.3725	29.7963	30.9718	31.2151						8	8	8	42	42	42	16.231	0	142.2	9119200000	74	8	8	8	8	8	8	8	8	8	8
tr|A0A090CFZ3|A0A090CFZ3_PODAN Putative Cyclin-C OS=Podospora anserina (strain S / ATCC MYA-4624 / DSM 980 / FGSC 10383) OX=515849 PE=3 SV=1	A0A090CFZ3	A0A090CFZ3					0.712551	0.358307	12.8152	0.445744	3.67978	1.037	3.67978	1.037	1	1	1	26.0515	26.5694	15.6994	26.9228	26.3248	26.1121						1	1	1	3.8	3.8	3.8	38.924	0.0057225	2.0655	452930000	7	1	1	0	1	1	1	1	1	0	1
tr|B2AMR1|B2AMR1_PODAN Podospora anserina S mat+ genomic DNA chromosome 5, supercontig 5 OS=Podospora anserina (strain S / ATCC MYA-4624 / DSM 980 / FGSC 10383) OX=515849 GN=PODANS_5_4910 PE=3 SV=1	B2AMR1	B2AMR1					0.712989	0.357899	1.11776	0.446239	0.160606	1.03799	0.160606	1.03799	7	7	7	29.9356	30.3318	30.3958	30.273	30.4648	30.4073						7	7	7	48.5	48.5	48.5	25.357	0	32.912	7994300000	66	4	5	6	6	4	5	4	5	6	6
tr|B2AX73|B2AX73_PODAN Podospora anserina S mat+ genomic DNA chromosome 7, supercontig 1 OS=Podospora anserina (strain S / ATCC MYA-4624 / DSM 980 / FGSC 10383) OX=515849 GN=PODANS_7_9550 PE=4 SV=1	B2AX73	B2AX73					0.713452	0.357673	11.3113	0.446513	3.49969	1.03854	3.49969	1.03854	1	1	1	15.6994	25.6842	25.9188	26.1182	25.7396	25.9437						1	1	1	2.5	2.5	2.5	43.71	0.0014706	2.4641	310760000	4	0	1	1	1	1	1	0	1	1	1
tr|B2AP08|B2AP08_PODAN Podospora anserina S mat+ genomic DNA chromosome 7, supercontig 3 OS=Podospora anserina (strain S / ATCC MYA-4624 / DSM 980 / FGSC 10383) OX=515849 GN=PODANS_7_820 PE=4 SV=1	B2AP08	B2AP08					0.709478	0.355324	1.10593	0.449376	0.145257	1.04424	0.145257	1.04424	10	10	10	29.3495	29.1223	29.1748	29.1189	29.4793	29.4842						10	10	10	33.3	33.3	33.3	39.587	0	62.998	3956900000	37	8	8	9	9	9	7	8	8	9	9
tr|B2AMK5|B2AMK5_PODAN Podospora anserina S mat+ genomic DNA chromosome 5, supercontig 5 OS=Podospora anserina (strain S / ATCC MYA-4624 / DSM 980 / FGSC 10383) OX=515849 GN=PODANS_5_4350 PE=3 SV=1	B2AMK5	B2AMK5					0.709155	0.354322	1.17973	0.450602	0.238455	1.04669	0.238455	1.04669	12	12	12	28.3089	27.9449	28.7026	28.6207	28.6207	28.4303						12	12	12	34.3	34.3	34.3	57.031	0	107.89	2215000000	35	8	9	9	10	10	11	8	9	9	10
tr|B2AZK2|B2AZK2_PODAN Podospora anserina S mat+ genomic DNA chromosome 3, supercontig 2 OS=Podospora anserina (strain S / ATCC MYA-4624 / DSM 980 / FGSC 10383) OX=515849 GN=PODANS_3_4690 PE=4 SV=1	B2AZK2	B2AZK2					0.709916	0.354134	8.48188	0.450832	3.08438	1.04714	3.08438	1.04714	2	2	2	15.6994	24.107	24.7469	24.2819	24.0849	25.4397						2	2	2	9.3	9.3	9.3	22.656	0	3.5263	129930000	3	0	2	2	1	2	1	0	2	2	1
tr|A0A090D5C4|A0A090D5C4_PODAN Uncharacterized protein OS=Podospora anserina (strain S / ATCC MYA-4624 / DSM 980 / FGSC 10383) OX=515849 PE=4 SV=1	A0A090D5C4	A0A090D5C4					0.707495	0.353022	1.40332	0.452199	0.488841	1.04987	0.488841	1.04987	2	2	2	23.0099	24.3977	24.1345	24.4774	24.5692	23.9622						2	2	2	16.4	16.4	16.4	12.928	0	3.1287	113560000	13	1	2	2	2	2	2	1	2	2	2
tr|B2AEZ2|B2AEZ2_PODAN Podospora anserina S mat+ genomic DNA chromosome 5, supercontig 1 OS=Podospora anserina (strain S / ATCC MYA-4624 / DSM 980 / FGSC 10383) OX=515849 GN=PODANS_5_1060 PE=4 SV=1	B2AEZ2	B2AEZ2					0.707925	0.352751	1.72144	0.452531	0.783618	1.05053	0.783618	1.05053	1	1	1	22.9629	22.3952	22.677	22.7556	22.7131	24.9172						1	1	1	3.4	3.4	3.4	42.769	0	3.2959	66037000	1	1	1	1	1	1	1	1	1	1	1
tr|B2AMB4|B2AMB4_PODAN Podospora anserina S mat+ genomic DNA chromosome 5, supercontig 8 OS=Podospora anserina (strain S / ATCC MYA-4624 / DSM 980 / FGSC 10383) OX=515849 GN=PODANS_5_7420 PE=4 SV=1	B2AMB4	B2AMB4					0.707025	0.351996	1.37011	0.453462	0.454295	1.05238	0.454295	1.05238	1	1	1	26.1636	26.5559	26.6433	26.1315	27.095	27.4992						1	1	1	14.3	14.3	14.3	15.328	0	9.2916	685210000	13	1	1	1	1	1	1	1	1	1	1
tr|A0A090C8G4|A0A090C8G4_PODAN Uncharacterized protein OS=Podospora anserina (strain S / ATCC MYA-4624 / DSM 980 / FGSC 10383) OX=515849 PE=4 SV=1	A0A090C8G4	A0A090C8G4					0.707266	0.351499	1.41194	0.454076	0.497676	1.05361	0.497676	1.05361	3	3	3	24.5148	25.8551	25.9475	26.0919	25.7672	25.9513						3	3	3	29.1	29.1	29.1	12.988	0	11.758	342890000	12	3	3	2	2	3	2	3	3	2	2
tr|B2ALT1|B2ALT1_PODAN Podospora anserina S mat+ genomic DNA chromosome 1, supercontig 3 OS=Podospora anserina (strain S / ATCC MYA-4624 / DSM 980 / FGSC 10383) OX=515849 GN=PODANS_1_13600 PE=4 SV=1	B2ALT1	B2ALT1					0.705509	0.350227	1.67297	0.455651	0.742414	1.05674	0.742414	1.05674	4	4	4	24.5713	25.6571	26.3508	27.1457	25.5149	26.1458						4	4	4	15.4	15.4	15.4	31.779	0	22.267	434100000	13	4	3	4	4	4	4	4	3	4	4
tr|B2A8W9|B2A8W9_PODAN Podospora anserina S mat+ genomic DNA chromosome 1, supercontig 1 OS=Podospora anserina (strain S / ATCC MYA-4624 / DSM 980 / FGSC 10383) OX=515849 GN=PODANS_1_7660 PE=4 SV=1	B2A8W9	B2A8W9					0.70485	0.349454	1.14262	0.45661	0.192349	1.05865	0.192349	1.05865	13	13	13	30.0917	29.5004	29.9044	30.035	30.1067	29.9319						13	13	13	29.2	29.2	29.2	62.707	0	184.65	6198700000	54	11	8	10	8	9	10	11	8	10	8
tr|B2VLH3|B2VLH3_PODAN Podospora anserina S mat+ genomic DNA chromosome 5, supercontig 6 OS=Podospora anserina (strain S / ATCC MYA-4624 / DSM 980 / FGSC 10383) OX=515849 GN=PODANS_5_6150 PE=4 SV=1	B2VLH3	B2VLH3					0.702622	0.347909	1.16896	0.458535	0.225229	1.06248	0.225229	1.06248	1	1	1	24.5741	24.7179	25.0998	25.0353	24.7694	25.2628						1	1	1	3.5	3.5	3.5	54.95	0	15.722	191770000	8	1	1	1	1	1	1	1	1	1	1
tr|B2ASK1|B2ASK1_PODAN Podospora anserina S mat+ genomic DNA chromosome 1, supercontig 6 OS=Podospora anserina (strain S / ATCC MYA-4624 / DSM 980 / FGSC 10383) OX=515849 GN=PODANS_1_23750 PE=4 SV=1	B2ASK1	B2ASK1					0.703734	0.347908	10.4418	0.458536	3.3843	1.06248	3.3843	1.06248	1	1	1	25.176	25.2954	15.6994	25.0398	25.6438	25.6402						1	1	1	3.3	3.3	3.3	51.994	0	21.088	218300000	2	1	1	0	1	1	1	1	1	0	1
tr|B2B6Z8|B2B6Z8_PODAN Podospora anserina S mat+ genomic DNA chromosome 2, supercontig 2 OS=Podospora anserina (strain S / ATCC MYA-4624 / DSM 980 / FGSC 10383) OX=515849 GN=PODANS_2_9400 PE=4 SV=1	B2B6Z8	B2B6Z8					0.704184	0.347577	1.22832	0.458949	0.296691	1.0633	0.296691	1.0633	1	1	1	21.9926	22.0863	22.7996	22.7698	22.3795	22.6194						1	1	1	4.9	4.9	4.9	39.449	0	3.1679	34977000	1	1	1	1	1	1	1	1	1	1	1
tr|B2AE65|B2AE65_PODAN Podospora anserina S mat+ genomic DNA chromosome 4, supercontig 2 OS=Podospora anserina (strain S / ATCC MYA-4624 / DSM 980 / FGSC 10383) OX=515849 GN=PODANS_4_3000 PE=4 SV=1	B2AE65	B2AE65					0.701981	0.346606	1.07291	0.460164	0.101531	1.06572	0.101531	1.06572	7	7	7	30.8502	30.7063	30.8033	30.7258	30.9237	31.0149						7	7	7	22.7	22.7	22.7	40.674	0	121.48	11544000000	50	5	5	7	5	7	7	5	5	7	5
tr|B2AVZ0|B2AVZ0_PODAN Podospora anserina S mat+ genomic DNA chromosome 7, supercontig 1 OS=Podospora anserina (strain S / ATCC MYA-4624 / DSM 980 / FGSC 10383) OX=515849 GN=PODANS_7_5360 PE=4 SV=1	B2AVZ0	B2AVZ0					0.70255	0.34634	1.35955	0.460498	0.443134	1.06638	0.443134	1.06638	2	2	2	26.4145	25.9709	26.862	26.5608	26.5051	27.5109						2	2	2	6	6	6	50.492	0	10.699	662670000	13	1	1	2	2	2	2	1	1	2	2
[truncated: 378 more rows]
[truncated: 62 more columns]
